# Supplementary material for: Deciphering of Adult Glioma Vulnerabilities through Expression Pattern Analysis of GABA, Glutamate and Calcium Neurotransmitter Genes
Source: MDPI journal article supplement (doi:10.3390/jpm12040633), 2022-04-14

Gene Ontology Term

## cell activation

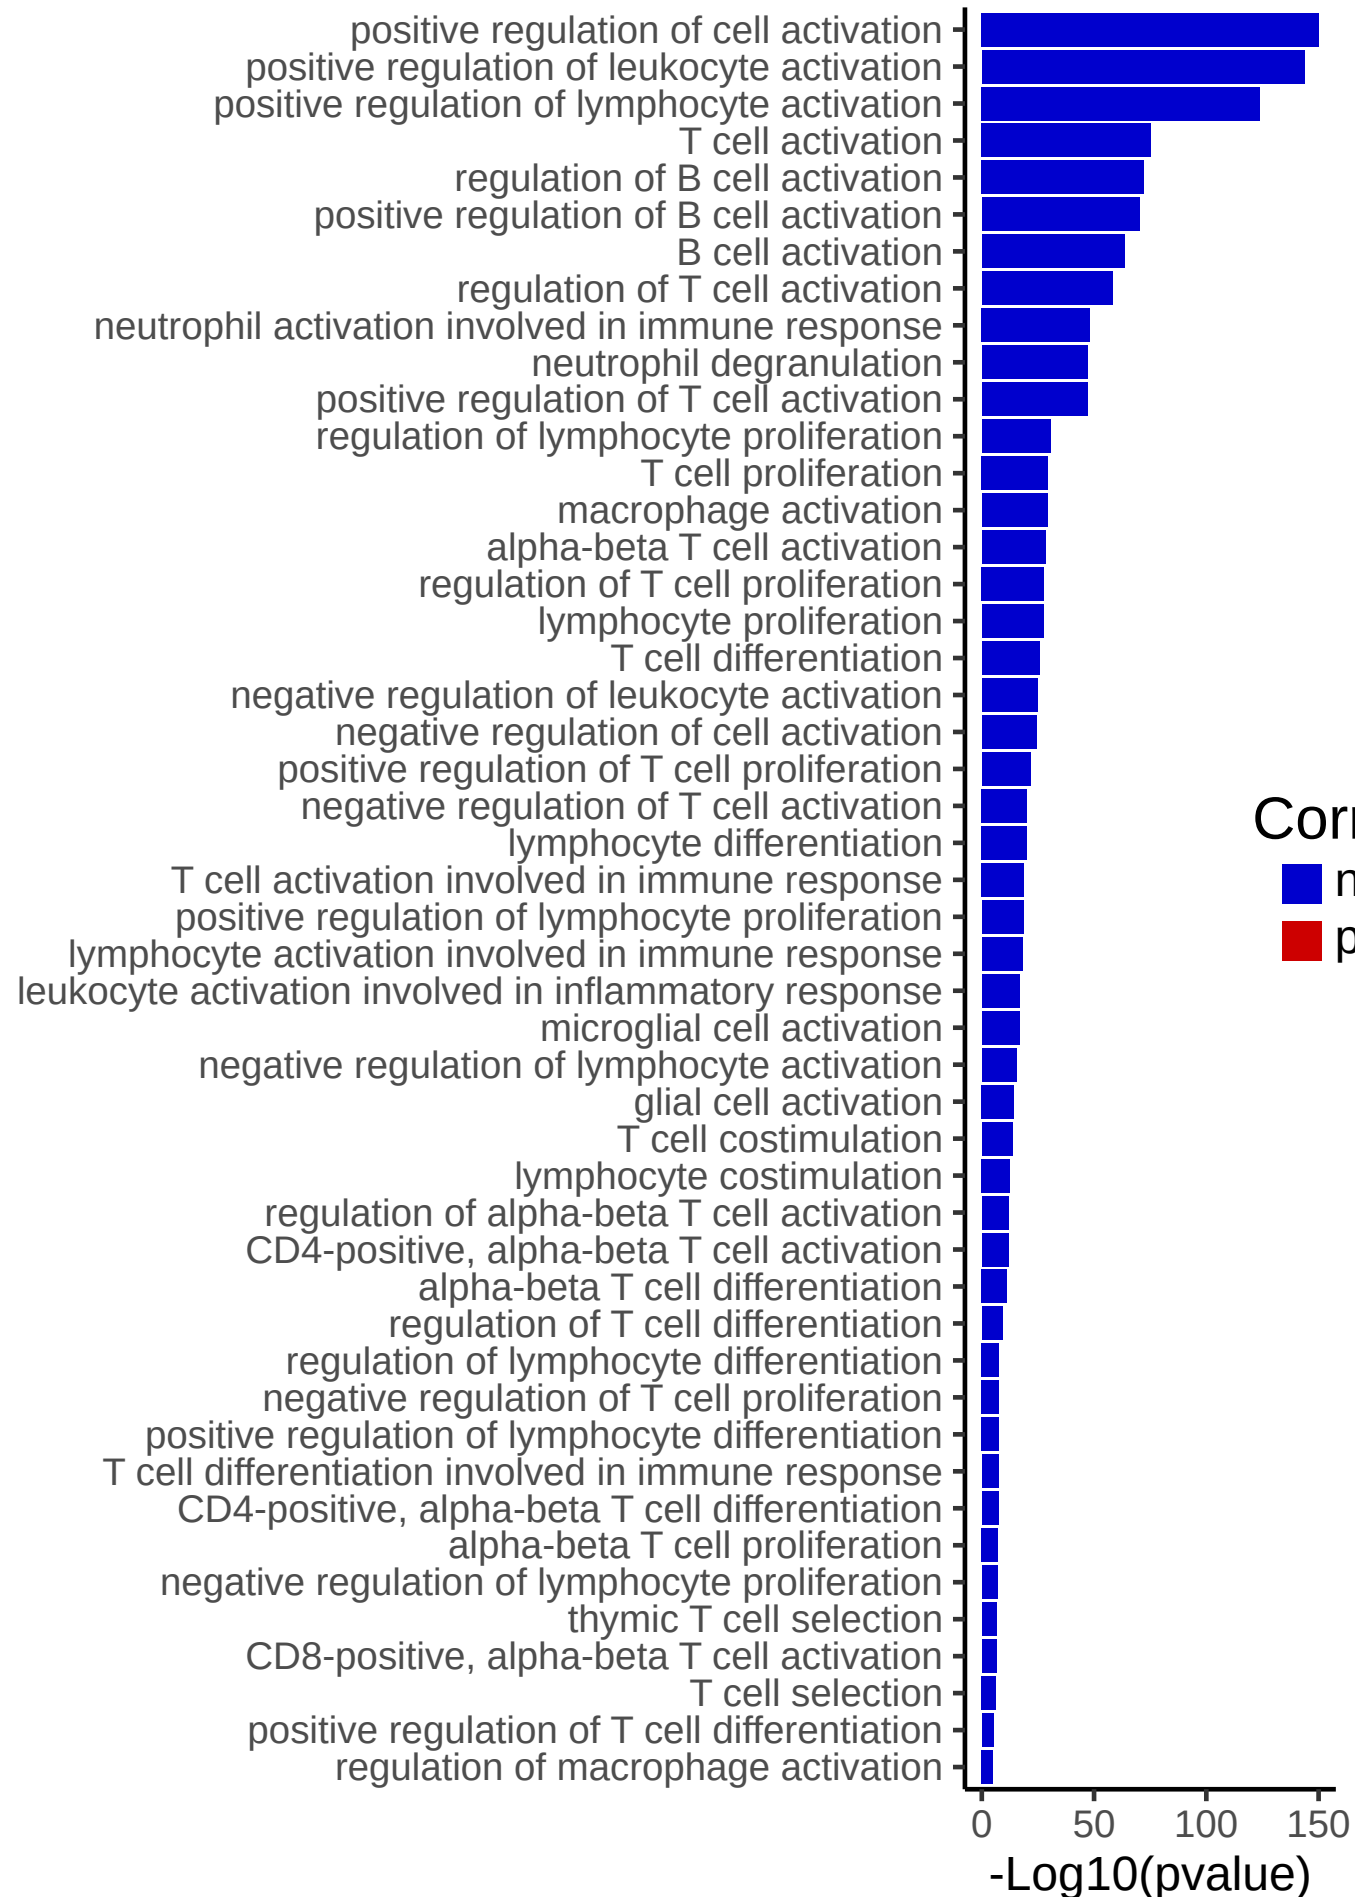

## Correlation

■ negative  
■ positive

## cell population proliferation

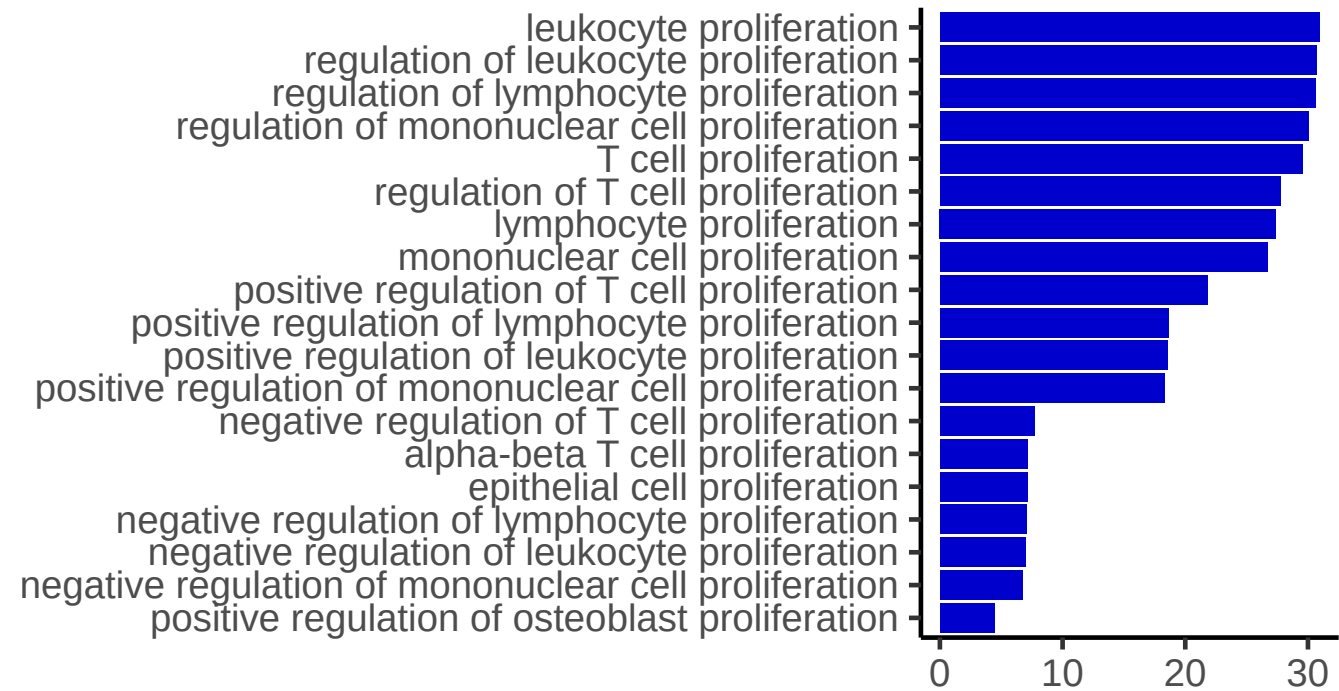

## movement of cell or subcellular component

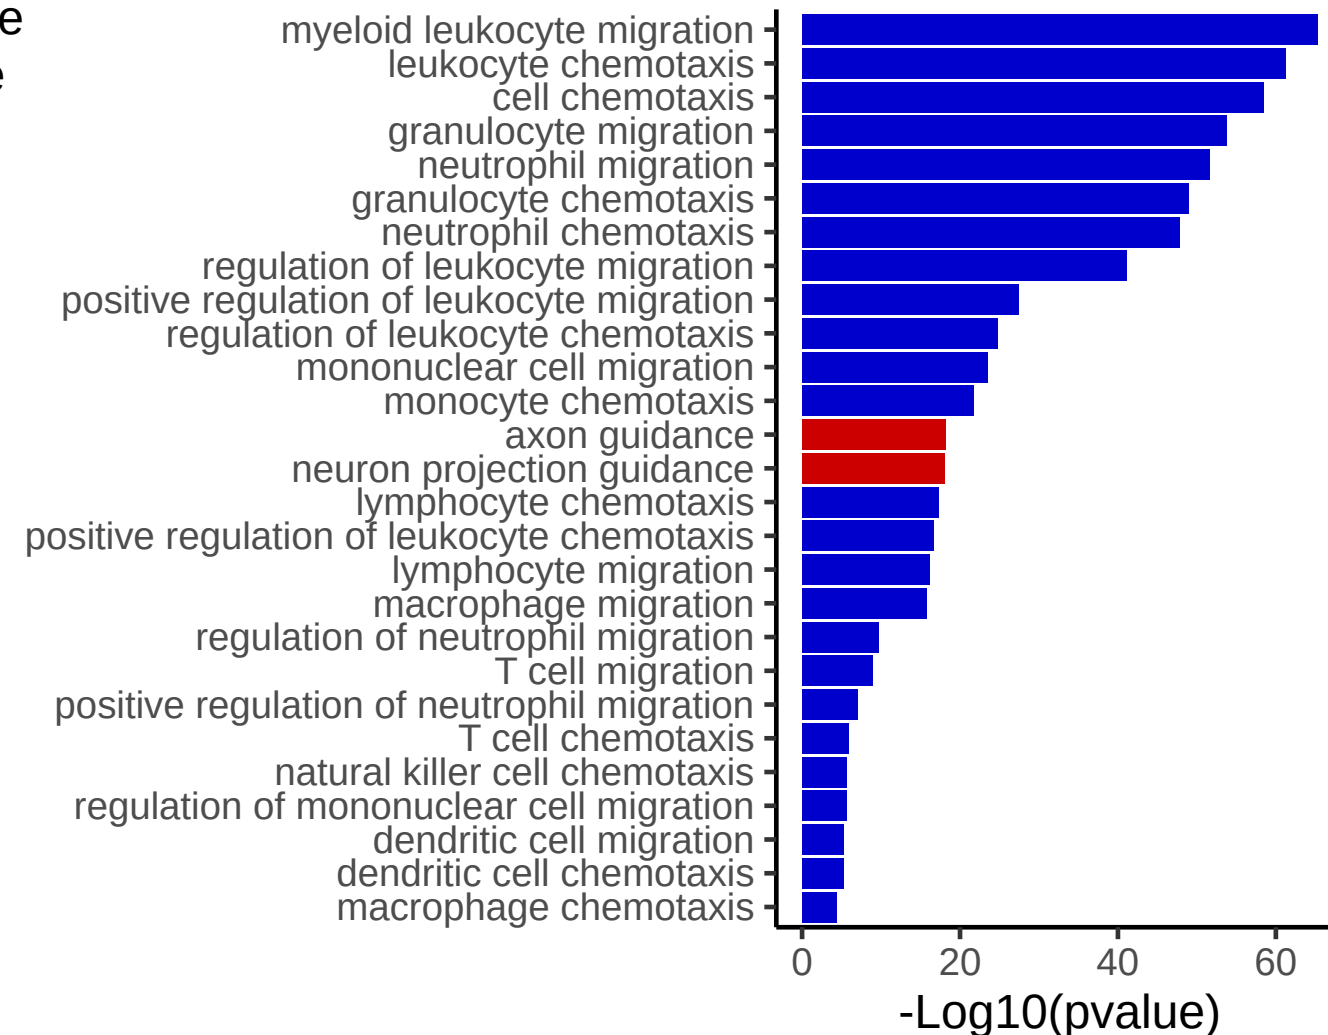

Supplement: s1 [file s1]
