# Supplementary material for: Deciphering of Adult Glioma Vulnerabilities through Expression Pattern Analysis of GABA, Glutamate and Calcium Neurotransmitter Genes
Source: J Pers Med. 2022 Apr 14;12(4):633. doi: 10.3390/jpm12040633 (PMC9030730; doi:10.3390/jpm12040633)
Supplement: Supplementary file 1 [file jpm-12-00633-s001.zip]

Archive with 13 entries (13 files):
- supplementary_data_figureS1_upsetplot_neurotransmission_genes.pdf
- supplementary_data_figureS2_entropy_curve.pdf
- supplementary_data_figureS3_correlations_sankeyplot_review.pdf
- supplementary_data_figureS4_negative_correlation_goterm.pdf
- supplementary_data_figureS5_positive_correlation_goterm.pdf
- supplementary_data_tableS1_highly_expressed_genes.xlsx
- supplementary_data_tableS2_sample_cluster_information.xlsx
- supplementary_data_tableS3_biomolecular_information.xlsx
- supplementary_data_tableS4_DE_gene_counting.xlsx
- supplementary_data_tableS5_mirna_average_expression.xlsx
- supplementary_data_tableS6_neurotransmission_correlations.xlsx
- supplementary_data_tableS7_immune_cell_type_enrichment.xlsx
- supplementary_data_tableS8_epidemio_biomol_distribution.xlsx
