# Supplementary material for: Deciphering of Adult Glioma Vulnerabilities through Expression Pattern Analysis of GABA, Glutamate and Calcium Neurotransmitter Genes
Source: J Pers Med. 2022 Apr 14;12(4):633. doi: 10.3390/jpm12040633 (PMC9030730; doi:10.3390/jpm12040633)
Supplement: Supplementary file 1 [file jpm-12-00633-s001.zip › supplementary_data_tableS1_highly_expressed_genes.xlsx]

## Sheet: supplementary_data_tableS1_high
Supplementary Data Table S1. List of the neurotransmitter-related genes used for the unsupervised clustering (>10 counts).
gene_id	gene_name
ENSG00000078369	GNB1
ENSG00000187730	GABRD
ENSG00000159423	ALDH4A1
ENSG00000169403	PTAFR
ENSG00000163873	GRIK3
ENSG00000177181	RIMKLA
ENSG00000162383	SLC1A7
ENSG00000172380	GNG12
ENSG00000050628	PTGER3
ENSG00000122420	PTGFR
ENSG00000142875	PRKACB
ENSG00000174021	GNG5
ENSG00000055732	MCOLN3
ENSG00000065135	GNAI3
ENSG00000134259	NGF
ENSG00000118729	CASQ2
ENSG00000163399	ATP1A1
ENSG00000198400	NTRK1
ENSG00000018625	ATP1A2
ENSG00000132681	ATP1A4
ENSG00000143318	CASQ1
ENSG00000143153	ATP1B1
ENSG00000197959	DNM3
ENSG00000198216	CACNA1E
ENSG00000135821	GLUL
ENSG00000116711	PLA2G4A
ENSG00000081248	CACNA1S
ENSG00000058668	ATP2B4
ENSG00000008118	CAMK1G
ENSG00000143772	ITPKB
ENSG00000168243	GNG4
ENSG00000198626	RYR2
ENSG00000133019	CHRM3
ENSG00000138031	ADCY3
ENSG00000084774	CAD
ENSG00000183023	SLC8A1
ENSG00000143933	CALM2
ENSG00000221823	PPP3R1
ENSG00000198380	GFPT1
ENSG00000115353	TACR1
ENSG00000121966	CXCR4
ENSG00000162989	KCNJ3
ENSG00000128683	GAD1
ENSG00000115252	PDE1A
ENSG00000115419	GLS
ENSG00000115896	PLCL1
ENSG00000115993	TRAK2
ENSG00000021826	CPS1
ENSG00000178568	ERBB4
ENSG00000115556	PLCD4
ENSG00000150995	ITPR1
ENSG00000196277	GRM7
ENSG00000180914	OXTR
ENSG00000134072	CAMK1
ENSG00000157087	ATP2B2
ENSG00000132164	SLC6A11
ENSG00000157103	SLC6A1
ENSG00000196639	HRH1
ENSG00000187091	PLCD1
ENSG00000160801	PTH1R
ENSG00000173531	MST1
ENSG00000188338	SLC38A3
ENSG00000114353	GNAI2
ENSG00000164082	GRM2
ENSG00000157388	CACNA1D
ENSG00000114021	NIT2
ENSG00000173175	ADCY5
ENSG00000065534	MYLK
ENSG00000069849	ATP1B3
ENSG00000144935	TRPC1
ENSG00000144891	AGTR1
ENSG00000075651	PLD1
ENSG00000114450	GNB4
ENSG00000161203	AP2M1
ENSG00000068078	FGFR3
ENSG00000185818	NAT8L
ENSG00000004468	CD38
ENSG00000109689	STIM2
ENSG00000163285	GABRG1
ENSG00000151834	GABRA2
ENSG00000109158	GABRA4
ENSG00000163288	GABRB1
ENSG00000134853	PDGFRA
ENSG00000128052	KDR
ENSG00000128059	PPAT
ENSG00000138675	FGF5
ENSG00000138814	PPP3CA
ENSG00000169836	TACR3
ENSG00000138798	EGF
ENSG00000145349	CAMK2D
ENSG00000138685	FGF2
ENSG00000151617	EDNRA
ENSG00000145431	PDGFC
ENSG00000120251	GRIA2
ENSG00000150630	VEGFC
ENSG00000151729	SLC25A4
ENSG00000078295	ADCY2
ENSG00000079215	SLC1A3
ENSG00000168621	GDNF
ENSG00000070193	FGF10
ENSG00000181104	F2R
ENSG00000152413	HOMER1
ENSG00000152495	CAMK4
ENSG00000213585	VDAC1
ENSG00000113578	FGF1
ENSG00000169252	ADRB2
ENSG00000113721	PDGFRB
ENSG00000070808	CAMK2A
ENSG00000155511	GRIA1
ENSG00000170214	ADRA1B
ENSG00000145864	GABRB2
ENSG00000145863	GABRA6
ENSG00000022355	GABRA1
ENSG00000113327	GABRG2
ENSG00000156427	FGF18
ENSG00000184845	DRD1
ENSG00000113749	HRH2
ENSG00000175416	CLTB
ENSG00000160867	FGFR4
ENSG00000131459	GFPT2
ENSG00000037280	FLT4
ENSG00000112294	ALDH5A1
ENSG00000204681	GABBR1
ENSG00000096433	ITPR3
ENSG00000124493	GRM4
ENSG00000112715	VEGFA
ENSG00000146276	GABRR1
ENSG00000164418	GRIK2
ENSG00000203797	DDO
ENSG00000198523	PLN
ENSG00000186439	TRDN
ENSG00000152822	GRM1
ENSG00000197461	PDGFA
ENSG00000154678	PDE1C
ENSG00000058404	CAMK2B
ENSG00000164742	ADCY1
ENSG00000146648	EGFR
ENSG00000164776	PHKG1
ENSG00000126522	ASL
ENSG00000127955	GNAI1
ENSG00000019991	HGF
ENSG00000198822	GRM3
ENSG00000127920	GNG11
ENSG00000070669	ASNS
ENSG00000172354	GNB2
ENSG00000160991	ORAI2
ENSG00000105976	MET
ENSG00000179603	GRM8
ENSG00000181072	CHRM2
ENSG00000164867	NOS3
ENSG00000157219	HTR5A
ENSG00000169100	SLC25A6
ENSG00000044446	PHKA2
ENSG00000017483	SLC38A5
ENSG00000067177	PHKA1
ENSG00000173198	CYSLTR1
ENSG00000147246	HTR2C
ENSG00000005022	SLC25A5
ENSG00000182890	GLUD2
ENSG00000125675	GRIA3
ENSG00000102287	GABRE
ENSG00000011677	GABRA3
ENSG00000268089	GABRQ
ENSG00000067842	ATP2B3
ENSG00000158815	FGF17
ENSG00000120910	PPP3CC
ENSG00000120907	ADRA1A
ENSG00000120899	PTK2B
ENSG00000077782	FGFR1
ENSG00000078668	VDAC3
ENSG00000198363	ASPH
ENSG00000104327	CALB1
ENSG00000155897	ADCY8
ENSG00000167701	GPT
ENSG00000106688	SLC1A1
ENSG00000122705	CLTA
ENSG00000156049	GNA14
ENSG00000156052	GNAQ
ENSG00000148053	NTRK2
ENSG00000136928	GABBR2
ENSG00000198785	GRIN3A
ENSG00000242616	GNG10
ENSG00000106976	DNM1
ENSG00000130707	ASS1
ENSG00000176884	GRIN1
ENSG00000148408	CACNA1B
ENSG00000183020	AP2A2
ENSG00000167323	STIM1
ENSG00000110148	CCKBR
ENSG00000091664	SLC17A6
ENSG00000110436	SLC1A2
ENSG00000086205	FOLH1
ENSG00000162174	ASRGL1
ENSG00000162188	GNG3
ENSG00000168539	CHRM1
ENSG00000173511	VEGFB
ENSG00000149782	PLCB3
ENSG00000173020	GRK2
ENSG00000162341	TPCN2
ENSG00000162105	SHANK2
ENSG00000168959	GRM5
ENSG00000170962	PDGFD
ENSG00000152578	GRIA4
ENSG00000137731	FXYD2
ENSG00000149403	GRIK4
ENSG00000183049	CAMK1D
ENSG00000136750	GAD2
ENSG00000165731	RET
ENSG00000156026	MCU
ENSG00000107758	PPP3CB
ENSG00000148660	CAMK2G
ENSG00000165637	VDAC2
ENSG00000108179	PPIF
ENSG00000148672	GLUD1
ENSG00000138193	PLCE1
ENSG00000120053	GOT1
ENSG00000043591	ADRB1
ENSG00000066468	FGFR2
ENSG00000111181	SLC6A12
ENSG00000010379	SLC6A13
ENSG00000151067	CACNA1C
ENSG00000111664	GNB3
ENSG00000166532	RIMKLB
ENSG00000139112	GABARAPL1
ENSG00000273079	GRIN2B
ENSG00000123104	ITPR2
ENSG00000111371	SLC38A1
ENSG00000134294	SLC38A2
ENSG00000111424	VDR
ENSG00000174233	ADCY6
ENSG00000123360	PDE1B
ENSG00000065361	ERBB3
ENSG00000166148	AVPR1A
ENSG00000070961	ATP2B1
ENSG00000179520	SLC17A8
ENSG00000174437	ATP2A2
ENSG00000186815	TPCN1
ENSG00000089250	NOS1
ENSG00000089041	P2RX7
ENSG00000135124	P2RX4
ENSG00000276045	ORAI1
ENSG00000187848	P2RX2
ENSG00000102678	FGF9
ENSG00000102755	FLT1
ENSG00000133116	KL
ENSG00000102468	HTR2A
ENSG00000152207	CYSLTR2
ENSG00000136160	EDNRB
ENSG00000129467	ADCY4
ENSG00000186469	GNG2
ENSG00000171723	GPHN
ENSG00000100678	SLC8A3
ENSG00000198668	CALM1
ENSG00000168398	BDKRB2
ENSG00000166206	GABRB3
ENSG00000186297	GABRA5
ENSG00000182256	GABRG3
ENSG00000175344	CHRNA7
ENSG00000198838	RYR3
ENSG00000184984	CHRM5
ENSG00000137841	PLCB2
ENSG00000137825	ITPKA
ENSG00000168970	JMJD7-PLA2G4B
ENSG00000140285	FGF7
ENSG00000069966	GNB5
ENSG00000103769	RAB11A
ENSG00000129007	CALML4
ENSG00000103942	HOMER2
ENSG00000140538	NTRK3
ENSG00000196557	CACNA1H
ENSG00000162104	ADCY9
ENSG00000183044	ABAT
ENSG00000183454	GRIN2A
ENSG00000166501	PRKCB
ENSG00000196296	ATP2A1
ENSG00000102882	MAPK3
ENSG00000156873	PHKG2
ENSG00000175938	ORAI3
ENSG00000140795	MYLK3
ENSG00000166123	GPT2
ENSG00000102893	PHKB
ENSG00000121281	ADCY7
ENSG00000087258	GNAO1
ENSG00000125166	GOT2
ENSG00000034713	GABARAPL2
ENSG00000197943	PLCG2
ENSG00000108381	ASPA
ENSG00000074370	ATP2A3
ENSG00000129219	PLD2
ENSG00000132535	DLG4
ENSG00000170296	GABARAP
ENSG00000129244	ATP1B2
ENSG00000170425	ADORA2B
ENSG00000007171	NOS2
ENSG00000006125	AP2B1
ENSG00000141736	ERBB2
ENSG00000173805	HAP1
ENSG00000161714	PLCD3
ENSG00000073969	NSF
ENSG00000006283	CACNA1G
ENSG00000141367	CLTC
ENSG00000154229	PRKCA
ENSG00000161509	GRIN2C
ENSG00000176170	SPHK1
ENSG00000170579	DLGAP1
ENSG00000141404	GNAL
ENSG00000171873	ADRA1D
ENSG00000182621	PLCB1
ENSG00000101333	PLCB4
ENSG00000101306	MYLK2
ENSG00000197122	SRC
ENSG00000101438	SLC32A1
ENSG00000124181	PLCG1
ENSG00000124140	SLC12A5
ENSG00000087460	GNAS
ENSG00000101188	NTSR1
ENSG00000176533	GNG7
ENSG00000088256	GNA11
ENSG00000060558	GNA15
ENSG00000006638	TBXA2R
ENSG00000090674	MCOLN1
ENSG00000079805	DNM2
ENSG00000141837	CACNA1A
ENSG00000072062	PRKACA
ENSG00000105143	SLC1A6
ENSG00000051128	HOMER3
ENSG00000196218	RYR1
ENSG00000086544	ITPKC
ENSG00000105409	ATP1A3
ENSG00000105737	GRIK5
ENSG00000160014	CALM3
ENSG00000042753	AP2S1
ENSG00000118160	SLC8A2
ENSG00000105499	PLA2G4C
ENSG00000105464	GRIN2D
ENSG00000063176	SPHK2
ENSG00000104888	SLC17A7
ENSG00000196961	AP2A1
ENSG00000104951	IL4I1
ENSG00000161681	SHANK1
ENSG00000126583	PRKCG
ENSG00000070371	CLTCL1
ENSG00000099957	P2RX6
ENSG00000100030	MAPK1
ENSG00000100077	GRK3
ENSG00000100311	PDGFB
ENSG00000100346	CACNA1I
ENSG00000239900	ADSL
ENSG00000251322	SHANK3
ENSG00000171189	GRIK1
ENSG00000157542	KCNJ6
