# Supplementary material for: Deciphering of Adult Glioma Vulnerabilities through Expression Pattern Analysis of GABA, Glutamate and Calcium Neurotransmitter Genes
Source: J Pers Med. 2022 Apr 14;12(4):633. doi: 10.3390/jpm12040633 (PMC9030730; doi:10.3390/jpm12040633)
Supplement: Supplementary file 1 [file jpm-12-00633-s001.zip › supplementary_data_tableS2_sample_cluster_information.xlsx]

## Sheet: supplementary_data_tableS2_samp
Supplementary data Table S2. Distribution of the NT-1-4 glioma clusters among the 661 TCGA glioma samples.
sample_id	cluster
TCGA-E1-A7YW	NT-4
TCGA-HT-8012	NT-1
TCGA-DU-A7TC	NT-1
TCGA-E1-A7YL	NT-2
TCGA-S9-A7IY	NT-4
TCGA-TM-A84F	NT-4
TCGA-DB-A64Q	NT-3
TCGA-DU-A5TS	NT-4
TCGA-HT-7467	NT-1
TCGA-HT-7605	NT-1
TCGA-S9-A7R7	NT-2
TCGA-HT-A5R5	NT-1
TCGA-P5-A5ET	NT-1
TCGA-VM-A8CD	NT-2
TCGA-TQ-A7RR	NT-4
TCGA-CS-4944	NT-4
TCGA-S9-A7J2	NT-3
TCGA-TQ-A7RH	NT-4
TCGA-DB-A4XG	NT-1
TCGA-RY-A83X	NT-3
TCGA-S9-A6U2	NT-3
TCGA-HT-A74O	NT-4
TCGA-HT-7858	NT-4
TCGA-DU-5854	NT-2
TCGA-E1-5304	NT-4
TCGA-S9-A89Z	NT-4
TCGA-DB-A64S	NT-4
TCGA-DH-5141	NT-3
TCGA-DU-5847	NT-2
TCGA-HT-7855	NT-4
TCGA-DU-8167	NT-4
TCGA-HW-A5KL	NT-4
TCGA-S9-A6WP	NT-1
TCGA-HW-7491	NT-3
TCGA-DU-A5TY	NT-2
TCGA-VM-A8CF	NT-4
TCGA-HT-7684	NT-4
TCGA-S9-A7QZ	NT-1
TCGA-HT-7676	NT-4
TCGA-E1-A7Z2	NT-1
TCGA-FG-7637	NT-3
TCGA-DB-A75P	NT-1
TCGA-HT-7483	NT-1
TCGA-TM-A84H	NT-4
TCGA-DU-A7T8	NT-4
TCGA-DU-8161	NT-2
TCGA-HT-7873	NT-4
TCGA-DU-6410	NT-1
TCGA-DB-5278	NT-1
TCGA-HT-7472	NT-4
TCGA-DU-A76L	NT-2
TCGA-HT-7688	NT-1
TCGA-P5-A736	NT-4
TCGA-QH-A870	NT-4
TCGA-DH-A66F	NT-3
TCGA-TM-A84L	NT-4
TCGA-DU-6392	NT-4
TCGA-HT-7606	NT-4
TCGA-FG-6690	NT-4
TCGA-HT-7609	NT-4
TCGA-EZ-7264	NT-3
TCGA-DU-7018	NT-3
TCGA-E1-A7YJ	NT-2
TCGA-S9-A7IQ	NT-1
TCGA-TM-A84T	NT-4
TCGA-P5-A731	NT-1
TCGA-E1-A7YY	NT-1
TCGA-DU-6400	NT-1
TCGA-DU-7302	NT-1
TCGA-TQ-A7RJ	NT-4
TCGA-HW-8322	NT-3
TCGA-E1-A7YN	NT-2
TCGA-DB-5281	NT-1
TCGA-QH-A6CU	NT-4
TCGA-FG-5964	NT-1
TCGA-DH-A66D	NT-4
TCGA-DU-6396	NT-4
TCGA-TM-A84R	NT-1
TCGA-FG-6688	NT-2
TCGA-HW-7489	NT-1
TCGA-S9-A6WG	NT-4
TCGA-P5-A737	NT-3
TCGA-HT-A614	NT-4
TCGA-DU-7294	NT-3
TCGA-FG-6692	NT-2
TCGA-R8-A73M	NT-3
TCGA-DB-5270	NT-1
TCGA-S9-A7IZ	NT-1
TCGA-DU-7010	NT-4
TCGA-S9-A6UB	NT-3
TCGA-DB-A64R	NT-1
TCGA-RY-A845	NT-1
TCGA-DU-A7TJ	NT-2
TCGA-S9-A7IS	NT-4
TCGA-FG-7641	NT-1
TCGA-DH-A7US	NT-3
TCGA-HT-A4DS	NT-2
TCGA-DU-7019	NT-1
TCGA-DB-A64X	NT-1
TCGA-HT-7877	NT-1
TCGA-VM-A8CE	NT-3
TCGA-P5-A5EW	NT-4
TCGA-HW-7486	NT-4
TCGA-HW-7490	NT-4
TCGA-CS-4942	NT-4
TCGA-S9-A6WO	NT-4
TCGA-DU-7011	NT-1
TCGA-S9-A6TS	NT-1
TCGA-VW-A7QS	NT-3
TCGA-DU-A5TW	NT-4
TCGA-S9-A6UA	NT-2
TCGA-HT-7690	NT-1
TCGA-DU-7007	NT-2
TCGA-S9-A6WN	NT-2
TCGA-CS-5395	NT-2
TCGA-HT-8010	NT-1
TCGA-RY-A843	NT-1
TCGA-FG-A60K	NT-3
TCGA-S9-A6WE	NT-1
TCGA-HT-8013	NT-4
TCGA-HT-7473	NT-4
TCGA-S9-A6U9	NT-4
TCGA-DU-A6S6	NT-1
TCGA-R8-A6YH	NT-4
TCGA-E1-5311	NT-1
TCGA-QH-A6X5	NT-4
TCGA-DU-A5TU	NT-4
TCGA-HT-7474	NT-1
TCGA-S9-A6WI	NT-1
TCGA-DU-A7TD	NT-2
TCGA-CS-5390	NT-1
TCGA-TQ-A7RG	NT-3
TCGA-E1-A7YK	NT-4
TCGA-DB-A64L	NT-1
TCGA-FG-8186	NT-1
TCGA-QH-A6CV	NT-2
TCGA-QH-A6CS	NT-2
TCGA-QH-A6CY	NT-1
TCGA-QH-A6CW	NT-4
TCGA-HW-8319	NT-1
TCGA-DU-6401	NT-4
TCGA-RY-A840	NT-3
TCGA-P5-A5EZ	NT-4
TCGA-HW-8320	NT-4
TCGA-DB-A4XD	NT-4
TCGA-S9-A7J3	NT-1
TCGA-DU-6402	NT-2
TCGA-R8-A6MK	NT-4
TCGA-TM-A84O	NT-1
TCGA-DU-8168	NT-1
TCGA-P5-A72U	NT-2
TCGA-HT-8110	NT-2
TCGA-S9-A7R8	NT-4
TCGA-DB-A64P	NT-3
TCGA-S9-A89V	NT-4
TCGA-DB-5280	NT-4
TCGA-HT-A74J	NT-1
TCGA-DH-A7UT	NT-4
TCGA-FG-8191	NT-4
TCGA-DH-5143	NT-1
TCGA-QH-A65S	NT-4
TCGA-HT-A5RB	NT-1
TCGA-TM-A7C3	NT-2
TCGA-P5-A781	NT-1
TCGA-DU-A76R	NT-1
TCGA-HT-7687	NT-1
TCGA-HT-7470	NT-1
TCGA-DU-A7T6	NT-1
TCGA-E1-A7YV	NT-4
TCGA-DB-A64V	NT-4
TCGA-HT-7477	NT-4
TCGA-CS-6186	NT-2
TCGA-DU-A5TP	NT-4
TCGA-HW-A5KK	NT-2
TCGA-HT-A5RA	NT-2
TCGA-HT-A615	NT-1
TCGA-HT-8011	NT-2
TCGA-DU-5852	NT-4
TCGA-S9-A6TV	NT-2
TCGA-HT-7469	NT-2
TCGA-FG-A4MY	NT-4
TCGA-DU-A7TA	NT-4
TCGA-HT-A74K	NT-3
TCGA-DU-7299	NT-4
TCGA-DU-A5TR	NT-4
TCGA-TQ-A7RS	NT-3
TCGA-DU-A5TT	NT-2
TCGA-HW-A5KJ	NT-3
TCGA-DB-A64W	NT-1
TCGA-VM-A8CA	NT-1
TCGA-DB-A4XB	NT-1
TCGA-FG-A711	NT-1
TCGA-HT-7476	NT-1
TCGA-HT-7611	NT-4
TCGA-TQ-A7RN	NT-3
TCGA-QH-A6CX	NT-2
TCGA-E1-A7YO	NT-1
TCGA-DU-A6S3	NT-1
TCGA-DU-7012	NT-2
TCGA-RY-A83Z	NT-3
TCGA-DB-5274	NT-3
TCGA-DU-7292	NT-1
TCGA-E1-A7YM	NT-2
TCGA-TM-A84Q	NT-4
TCGA-P5-A72W	NT-4
TCGA-QH-A6XC	NT-1
TCGA-DB-A4XC	NT-1
TCGA-P5-A72X	NT-4
TCGA-HT-A61B	NT-4
TCGA-FG-A6IZ	NT-3
TCGA-E1-A7YE	NT-4
TCGA-TM-A84I	NT-4
TCGA-DU-8165	NT-2
TCGA-DH-A66B	NT-4
TCGA-S9-A7QX	NT-4
TCGA-DU-A76K	NT-1
TCGA-E1-5318	NT-3
TCGA-QH-A6XA	NT-4
TCGA-HT-7485	NT-4
TCGA-DU-7013	NT-4
TCGA-WY-A85E	NT-1
TCGA-FG-7634	NT-3
TCGA-FN-7833	NT-4
TCGA-HT-7610	NT-1
TCGA-DU-8164	NT-1
TCGA-HT-7468	NT-3
TCGA-DB-A4XA	NT-1
TCGA-HT-7884	NT-4
TCGA-E1-A7Z3	NT-1
TCGA-S9-A6U1	NT-4
TCGA-DU-7298	NT-1
TCGA-DB-5273	NT-4
TCGA-RY-A847	NT-1
TCGA-P5-A5F1	NT-4
TCGA-FG-A70Z	NT-4
TCGA-CS-6669	NT-1
TCGA-E1-A7YD	NT-2
TCGA-DH-A7UV	NT-4
TCGA-CS-6667	NT-4
TCGA-DU-A6S7	NT-4
TCGA-DB-A4XF	NT-1
TCGA-FG-7638	NT-1
TCGA-FG-8189	NT-1
TCGA-S9-A6TY	NT-1
TCGA-E1-A7YQ	NT-2
TCGA-HT-7681	NT-1
TCGA-E1-5322	NT-4
TCGA-DB-A75L	NT-1
TCGA-HT-A5R9	NT-3
TCGA-DU-5874	NT-3
TCGA-CS-6666	NT-4
TCGA-FG-A4MW	NT-2
TCGA-FG-6691	NT-4
TCGA-FG-A87Q	NT-2
TCGA-RY-A83Y	NT-3
TCGA-HT-8563	NT-2
TCGA-S9-A6U0	NT-2
TCGA-S9-A7J1	NT-3
TCGA-FG-8187	NT-4
TCGA-P5-A780	NT-4
TCGA-CS-5393	NT-1
TCGA-S9-A7QY	NT-1
TCGA-HT-7481	NT-1
TCGA-CS-5397	NT-1
TCGA-TQ-A7RW	NT-4
TCGA-WY-A859	NT-1
TCGA-HW-8321	NT-4
TCGA-WY-A85C	NT-4
TCGA-HT-7874	NT-1
TCGA-F6-A8O3	NT-1
TCGA-TQ-A7RP	NT-2
TCGA-FG-8181	NT-1
TCGA-HT-7857	NT-2
TCGA-HT-7882	NT-2
TCGA-HT-7601	NT-4
TCGA-DB-5279	NT-1
TCGA-E1-5307	NT-1
TCGA-S9-A6WH	NT-3
TCGA-KT-A74X	NT-3
TCGA-HT-7602	NT-4
TCGA-FG-5962	NT-1
TCGA-HT-A616	NT-1
TCGA-S9-A6WM	NT-2
TCGA-HT-A5RC	NT-2
TCGA-HT-8015	NT-1
TCGA-KT-A7W1	NT-2
TCGA-P5-A5EU	NT-2
TCGA-DU-6393	NT-3
TCGA-CS-6668	NT-3
TCGA-FG-A710	NT-1
TCGA-S9-A7R3	NT-4
TCGA-HT-A619	NT-3
TCGA-FG-6689	NT-1
TCGA-WY-A85D	NT-4
TCGA-S9-A6TW	NT-3
TCGA-CS-5396	NT-3
TCGA-TQ-A7RI	NT-3
TCGA-VM-A8C8	NT-4
TCGA-HT-7691	NT-2
TCGA-VM-A8CH	NT-4
TCGA-VV-A829	NT-3
TCGA-TM-A84J	NT-4
TCGA-DU-6394	NT-3
TCGA-P5-A72Z	NT-3
TCGA-HT-7616	NT-3
TCGA-HT-7695	NT-1
TCGA-DU-7300	NT-1
TCGA-QH-A86X	NT-1
TCGA-HW-A5KM	NT-4
TCGA-S9-A7QW	NT-4
TCGA-P5-A733	NT-4
TCGA-HT-7693	NT-4
TCGA-VM-A8C9	NT-2
TCGA-TQ-A7RM	NT-4
TCGA-HT-7482	NT-4
TCGA-HT-7680	NT-2
TCGA-DH-A7UR	NT-3
TCGA-HT-7608	NT-4
TCGA-DU-A6S2	NT-1
TCGA-DB-A75M	NT-4
TCGA-P5-A730	NT-4
TCGA-HT-8019	NT-1
TCGA-HT-A618	NT-4
TCGA-FG-A4MX	NT-3
TCGA-HT-8111	NT-4
TCGA-HT-7604	NT-4
TCGA-DU-A7TG	NT-1
TCGA-DU-6542	NT-1
TCGA-DU-5849	NT-1
TCGA-F6-A8O4	NT-1
TCGA-DU-6395	NT-4
TCGA-IK-7675	NT-4
TCGA-S9-A6U8	NT-4
TCGA-CS-6670	NT-1
TCGA-DB-A64O	NT-2
TCGA-TM-A84B	NT-2
TCGA-DU-7009	NT-1
TCGA-P5-A77X	NT-1
TCGA-HT-A61A	NT-1
TCGA-S9-A6WQ	NT-4
TCGA-DU-8166	NT-1
TCGA-HT-8107	NT-1
TCGA-DB-A75K	NT-3
TCGA-FG-A87N	NT-4
TCGA-S9-A6U6	NT-1
TCGA-S9-A6TZ	NT-4
TCGA-P5-A5F6	NT-2
TCGA-E1-5319	NT-3
TCGA-HW-7487	NT-1
TCGA-E1-A7YI	NT-4
TCGA-HT-7480	NT-1
TCGA-DB-A64U	NT-3
TCGA-DB-A4X9	NT-4
TCGA-P5-A735	NT-4
TCGA-HT-7479	NT-4
TCGA-P5-A77W	NT-3
TCGA-WY-A858	NT-4
TCGA-FG-7636	NT-4
TCGA-WY-A85B	NT-4
TCGA-TM-A7C4	NT-1
TCGA-QH-A6X8	NT-3
TCGA-HT-7686	NT-4
TCGA-HT-8108	NT-4
TCGA-HW-7495	NT-1
TCGA-DH-5144	NT-3
TCGA-E1-A7YH	NT-4
TCGA-TQ-A7RF	NT-4
TCGA-E1-A7YU	NT-1
TCGA-DU-7006	NT-2
TCGA-IK-8125	NT-1
TCGA-P5-A5F2	NT-1
TCGA-TM-A84G	NT-3
TCGA-HT-7475	NT-1
TCGA-DU-7309	NT-1
TCGA-QH-A6X3	NT-4
TCGA-DB-A75O	NT-4
TCGA-FG-8188	NT-4
TCGA-DU-6399	NT-4
TCGA-FG-8185	NT-4
TCGA-HT-8564	NT-1
TCGA-P5-A5F0	NT-1
TCGA-S9-A6WL	NT-1
TCGA-VM-A8CB	NT-3
TCGA-HT-8114	NT-4
TCGA-S9-A7R4	NT-4
TCGA-S9-A7R2	NT-2
TCGA-DU-6408	NT-4
TCGA-DU-7290	NT-2
TCGA-HT-7694	NT-1
TCGA-S9-A6TU	NT-4
TCGA-FG-A713	NT-1
TCGA-TQ-A7RO	NT-1
TCGA-HT-8105	NT-1
TCGA-DU-6403	NT-4
TCGA-QH-A65R	NT-3
TCGA-QH-A6CZ	NT-1
TCGA-DU-7015	NT-4
TCGA-DH-A7UU	NT-4
TCGA-HT-7478	NT-4
TCGA-CS-4943	NT-4
TCGA-TM-A84M	NT-3
TCGA-S9-A7IX	NT-1
TCGA-DB-A4XE	NT-1
TCGA-DH-A66G	NT-1
TCGA-DU-6406	NT-2
TCGA-HT-8113	NT-1
TCGA-HT-7854	NT-2
TCGA-HT-A61C	NT-4
TCGA-HT-7880	NT-1
TCGA-E1-5303	NT-4
TCGA-DH-5140	NT-4
TCGA-FG-8182	NT-4
TCGA-S9-A6WD	NT-1
TCGA-HT-7879	NT-4
TCGA-DU-7301	NT-4
TCGA-S9-A7R1	NT-1
TCGA-HT-7860	NT-2
TCGA-HT-8018	NT-1
TCGA-S9-A7J0	NT-4
TCGA-CS-6290	NT-4
TCGA-DU-6405	NT-2
TCGA-HT-7677	NT-3
TCGA-DU-A6S8	NT-3
TCGA-TM-A84C	NT-2
TCGA-CS-4938	NT-4
TCGA-QH-A65X	NT-3
TCGA-DH-5142	NT-4
TCGA-CS-5394	NT-3
TCGA-P5-A5EY	NT-1
TCGA-DU-5853	NT-4
TCGA-FG-A60L	NT-4
TCGA-DU-8162	NT-1
TCGA-DU-8163	NT-4
TCGA-R8-A6ML	NT-3
TCGA-VV-A86M	NT-4
TCGA-E1-5302	NT-4
TCGA-HT-7689	NT-4
TCGA-HT-A74L	NT-3
TCGA-DB-A4XH	NT-1
TCGA-DB-5277	NT-4
TCGA-P5-A5EX	NT-2
TCGA-TM-A7C5	NT-3
TCGA-HT-8109	NT-1
TCGA-HT-A4DV	NT-1
TCGA-E1-A7Z4	NT-4
TCGA-HT-A5R7	NT-1
TCGA-FG-A70Y	NT-4
TCGA-S9-A6U5	NT-3
TCGA-E1-A7YS	NT-3
TCGA-FG-A4MU	NT-2
TCGA-HT-8104	NT-2
TCGA-S9-A6TX	NT-3
TCGA-HT-7471	NT-3
TCGA-HT-7902	NT-4
TCGA-E1-A7Z6	NT-4
TCGA-HT-7881	NT-1
TCGA-FG-A60J	NT-4
TCGA-WH-A86K	NT-4
TCGA-R8-A6MO	NT-3
TCGA-W9-A837	NT-1
TCGA-CS-6188	NT-2
TCGA-P5-A5F4	NT-1
TCGA-VW-A8FI	NT-2
TCGA-WY-A85A	NT-4
TCGA-E1-5305	NT-1
TCGA-HT-8558	NT-1
TCGA-HT-A74H	NT-2
TCGA-FG-A6J3	NT-4
TCGA-HT-7856	NT-1
TCGA-HT-7875	NT-1
TCGA-DU-8158	NT-2
TCGA-DU-5855	NT-4
TCGA-DU-A76O	NT-4
TCGA-HT-A617	NT-2
TCGA-TQ-A7RQ	NT-1
TCGA-CS-4941	NT-2
TCGA-QH-A65Z	NT-1
TCGA-DU-5871	NT-4
TCGA-QH-A65V	NT-4
TCGA-DU-7306	NT-4
TCGA-QH-A6X4	NT-3
TCGA-HT-7692	NT-3
TCGA-DB-5275	NT-4
TCGA-FG-7643	NT-1
TCGA-TM-A7CA	NT-1
TCGA-DU-A7TB	NT-4
TCGA-FG-A6J1	NT-3
TCGA-HT-7607	NT-1
TCGA-TM-A84S	NT-3
TCGA-DU-7008	NT-1
TCGA-HT-7620	NT-4
TCGA-QH-A6X9	NT-1
TCGA-HT-7603	NT-1
TCGA-P5-A5EV	NT-4
TCGA-06-2563	NT-2
TCGA-06-0138	NT-2
TCGA-06-2570	NT-4
TCGA-15-1444	NT-4
TCGA-41-4097	NT-2
TCGA-32-4213	NT-2
TCGA-06-2562	NT-2
TCGA-06-0878	NT-2
TCGA-15-0742	NT-2
TCGA-76-4929	NT-2
TCGA-06-5418	NT-2
TCGA-27-2519	NT-2
TCGA-27-1834	NT-2
TCGA-06-5410	NT-2
TCGA-26-5136	NT-2
TCGA-06-0744	NT-2
TCGA-19-2625	NT-2
TCGA-06-0749	NT-2
TCGA-06-0645	NT-2
TCGA-32-5222	NT-2
TCGA-28-5215	NT-4
TCGA-41-2571	NT-4
TCGA-28-5204	NT-2
TCGA-28-1753	NT-2
TCGA-32-2632	NT-2
TCGA-06-1804	NT-2
TCGA-06-2557	NT-2
TCGA-06-0745	NT-2
TCGA-76-4931	NT-4
TCGA-06-0882	NT-2
TCGA-06-0743	NT-2
TCGA-27-1832	NT-2
TCGA-41-5651	NT-4
TCGA-06-0158	NT-2
TCGA-06-0130	NT-2
TCGA-06-0184	NT-2
TCGA-28-2514	NT-4
TCGA-14-0781	NT-2
TCGA-06-2565	NT-2
TCGA-19-2629	NT-4
TCGA-06-5412	NT-2
TCGA-06-0139	NT-2
TCGA-28-5218	NT-2
TCGA-19-5960	NT-2
TCGA-41-3915	NT-2
TCGA-06-2559	NT-4
TCGA-14-2554	NT-2
TCGA-76-4927	NT-2
TCGA-06-5411	NT-1
TCGA-76-4925	NT-2
TCGA-27-1830	NT-2
TCGA-06-5408	NT-2
TCGA-06-0747	NT-2
TCGA-12-3653	NT-2
TCGA-19-1389	NT-2
TCGA-28-5207	NT-2
TCGA-14-1823	NT-2
TCGA-06-0152	NT-2
TCGA-06-2561	NT-2
TCGA-06-0178	NT-4
TCGA-28-5209	NT-2
TCGA-12-0616	NT-4
TCGA-28-2513	NT-2
TCGA-28-5220	NT-2
TCGA-12-0821	NT-2
TCGA-27-1837	NT-4
TCGA-02-2486	NT-2
TCGA-08-0386	NT-2
TCGA-76-4932	NT-2
TCGA-14-0871	NT-2
TCGA-32-1980	NT-1
TCGA-12-1597	NT-4
TCGA-02-0055	NT-2
TCGA-32-1982	NT-2
TCGA-06-0750	NT-2
TCGA-28-1747	NT-2
TCGA-27-2528	NT-2
TCGA-12-0619	NT-2
TCGA-06-5856	NT-2
TCGA-06-0646	NT-4
TCGA-06-0221	NT-1
TCGA-06-0129	NT-4
TCGA-14-0787	NT-2
TCGA-27-1835	NT-2
TCGA-26-5135	NT-2
TCGA-16-0846	NT-4
TCGA-14-1829	NT-2
TCGA-76-4928	NT-2
TCGA-19-2620	NT-2
TCGA-06-2567	NT-2
TCGA-32-2615	NT-2
TCGA-12-5295	NT-2
TCGA-06-0649	NT-2
TCGA-06-0219	NT-2
TCGA-06-0174	NT-4
TCGA-26-5139	NT-2
TCGA-06-2569	NT-2
TCGA-06-0187	NT-2
TCGA-06-0132	NT-1
TCGA-28-5208	NT-2
TCGA-28-2509	NT-2
TCGA-06-0238	NT-4
TCGA-06-5858	NT-2
TCGA-19-0957	NT-4
TCGA-14-1825	NT-4
TCGA-26-1442	NT-4
TCGA-12-5299	NT-2
TCGA-06-5413	NT-2
TCGA-28-2499	NT-2
TCGA-14-0790	NT-2
TCGA-02-2483	NT-4
TCGA-28-5213	NT-2
TCGA-27-2524	NT-2
TCGA-27-2521	NT-4
TCGA-32-1970	NT-2
TCGA-06-5414	NT-2
TCGA-06-0171	NT-2
TCGA-19-2624	NT-4
TCGA-28-2510	NT-1
TCGA-02-2485	NT-2
TCGA-32-2634	NT-4
TCGA-06-0686	NT-4
TCGA-14-0817	NT-2
TCGA-02-0047	NT-4
TCGA-41-2572	NT-2
TCGA-27-2523	NT-2
TCGA-14-0789	NT-2
TCGA-12-0618	NT-4
TCGA-32-2638	NT-2
TCGA-12-3652	NT-2
TCGA-06-2558	NT-4
TCGA-19-1390	NT-4
TCGA-16-1045	NT-2
TCGA-06-2564	NT-2
TCGA-27-2526	NT-2
TCGA-06-0157	NT-2
TCGA-76-4926	NT-2
TCGA-06-0644	NT-2
TCGA-12-3650	NT-2
TCGA-26-5132	NT-2
TCGA-06-5859	NT-2
TCGA-26-5133	NT-4
TCGA-28-5216	NT-4
TCGA-27-1831	NT-2
TCGA-26-5134	NT-4
TCGA-06-0141	NT-2
TCGA-06-0168	NT-2
TCGA-19-2619	NT-2
TCGA-TQ-A7RV	NT-1
TCGA-DU-5870	NT-3
TCGA-FG-5963	NT-4
TCGA-DU-6397	NT-3
TCGA-DU-7304	NT-3
TCGA-TQ-A7RK	NT-4
TCGA-FG-A4MT	NT-1
TCGA-DH-A669	NT-3
TCGA-DU-6407	NT-3
TCGA-DU-5872	NT-2
TCGA-FG-5965	NT-4
TCGA-TM-A7CF	NT-4
TCGA-DU-6404	NT-4
TCGA-TQ-A8XE	NT-4
TCGA-06-0210	NT-2
TCGA-06-0211	NT-2
TCGA-14-1034	NT-2
TCGA-06-0125	NT-2
TCGA-06-0190	NT-2
