# Supplementary material for: Deciphering of Adult Glioma Vulnerabilities through Expression Pattern Analysis of GABA, Glutamate and Calcium Neurotransmitter Genes
Source: J Pers Med. 2022 Apr 14;12(4):633. doi: 10.3390/jpm12040633 (PMC9030730; doi:10.3390/jpm12040633)
Supplement: Supplementary file 1 [file jpm-12-00633-s001.zip › supplementary_data_tableS3_biomolecular_information.xlsx]

## Sheet: formated_data
Supplementary data Table S3. Distribution of biomolecular and epidemiological variables among NT-1-4 glioma clusters.
variable	category	NT-1 (n = 168)	NT-2 (n = 188)	NT-3 (n = 81)	NT-4 (n = 224)
gender	unknown	1 (0.6%)	0 (0.0%)	0 (0.0%)	1 (0.4%)
	female	77 (45.8%)	75 (39.9%)	39 (48.1%)	88 (39.3%)
	male	90 (53.6%)	113 (60.1%)	42 (51.9%)	135 (60.3%)
Histology	astrocytoma	32 (19.0%)	45 (23.9%)	3 (3.7%)	86 (38.4%)
	glioblastoma	4 (2.4%)	115 (61.2%)	0 (0.0%)	33 (14.7%)
	oligoastrocytoma	36 (21.4%)	10 (5.3%)	14 (17.3%)	52 (23.2%)
	oligodendroglioma	81 (48.2%)	11 (5.9%)	51 (63.0%)	30 (13.4%)
	unknown	15 (8.9%)	7 (3.7%)	13 (16.0%)	23 (10.3%)
Grade	G2	87 (51.8%)	13 (6.9%)	30 (37.0%)	84 (37.5%)
	G3	62 (36.9%)	53 (28.2%)	38 (46.9%)	84 (37.5%)
	G4	4 (2.4%)	115 (61.2%)	0 (0.0%)	33 (14.7%)
	unknown	15 (8.9%)	7 (3.7%)	13 (16.0%)	23 (10.3%)
Karnofsky_Performance_Score	40	1 (0.6%)	8 (4.3%)	0 (0.0%)	0 (0.0%)
	50	2 (1.2%)	0 (0.0%)	0 (0.0%)	2 (0.9%)
	60	2 (1.2%)	21 (11.2%)	1 (1.2%)	10 (4.5%)
	70	12 (7.1%)	5 (2.7%)	2 (2.5%)	2 (0.9%)
	80	14 (8.3%)	60 (31.9%)	6 (7.4%)	27 (12.1%)
	90	26 (15.5%)	17 (9.0%)	14 (17.3%)	54 (24.1%)
	100	24 (14.3%)	12 (6.4%)	16 (19.8%)	35 (15.6%)
	unknown	87 (51.8%)	65 (34.6%)	42 (51.9%)	94 (42.0%)
classification	IDHmut_CODEL	80 (47.6%)	2 (1.1%)	75 (92.6%)	11 (4.9%)
	IDHmut_nonCODEL	67 (39.9%)	6 (3.2%)	6 (7.4%)	176 (78.6%)
	IDHwt	21 (12.5%)	180 (95.7%)	0 (0.0%)	37 (16.5%)
IDH_status	Mutant	147 (87.5%)	8 (4.3%)	81 (100.0%)	187 (83.5%)
	WT	21 (12.5%)	180 (95.7%)	0 (0.0%)	37 (16.5%)
1p_19q_codeletion	codel	80 (47.6%)	2 (1.1%)	75 (92.6%)	11 (4.9%)
	non-codel	88 (52.4%)	183 (97.3%)	6 (7.4%)	212 (94.6%)
	unknown	0 (0.0%)	3 (1.6%)	0 (0.0%)	1 (0.4%)
Chr_7_gain_Chr_10_loss	Gain chr 7 & loss chr 10	6 (3.6%)	129 (68.6%)	0 (0.0%)	18 (8.0%)
	No combined CNA	160 (95.2%)	56 (29.8%)	80 (98.8%)	205 (91.5%)
	unknown	2 (1.2%)	3 (1.6%)	1 (1.2%)	1 (0.4%)
TERT_promoter_status	Mutant	52 (31.0%)	54 (28.7%)	32 (39.5%)	18 (8.0%)
	unknown	65 (38.7%)	124 (66.0%)	44 (54.3%)	109 (48.7%)
	WT	51 (30.4%)	10 (5.3%)	5 (6.2%)	97 (43.3%)
MGMT_promoter_status	Methylated	145 (86.3%)	68 (36.2%)	80 (98.8%)	174 (77.7%)
	unknown	2 (1.2%)	24 (12.8%)	0 (0.0%)	7 (3.1%)
	Unmethylated	21 (12.5%)	96 (51.1%)	1 (1.2%)	43 (19.2%)
ATRX_status	Mutant	46 (27.4%)	10 (5.3%)	5 (6.2%)	133 (59.4%)
	unknown	0 (0.0%)	3 (1.6%)	0 (0.0%)	1 (0.4%)
	WT	122 (72.6%)	175 (93.1%)	76 (93.8%)	90 (40.2%)
EGFR	0	160 (95.2%)	86 (45.7%)	80 (98.8%)	204 (91.1%)
	amplification	5 (3.0%)	89 (47.3%)	0 (0.0%)	17 (7.6%)
	unknown	3 (1.8%)	8 (4.3%)	1 (1.2%)	3 (1.3%)
	deletion	0 (0.0%)	5 (2.7%)	0 (0.0%)	0 (0.0%)
FGFR	0	165 (98.2%)	179 (95.2%)	80 (98.8%)	219 (97.8%)
	amplification	0 (0.0%)	1 (0.5%)	0 (0.0%)	2 (0.9%)
	unknown	3 (1.8%)	8 (4.3%)	1 (1.2%)	3 (1.3%)
CDKN2A	0	146 (86.9%)	75 (39.9%)	76 (93.8%)	184 (82.1%)
	deletion	18 (10.7%)	105 (55.9%)	4 (4.9%)	37 (16.5%)
	unknown	3 (1.8%)	8 (4.3%)	1 (1.2%)	3 (1.3%)
	amplification	1 (0.6%)	0 (0.0%)	0 (0.0%)	0 (0.0%)
CDKN2B	0	147 (87.5%)	76 (40.4%)	76 (93.8%)	184 (82.1%)
	deletion	18 (10.7%)	103 (54.8%)	4 (4.9%)	37 (16.5%)
	unknown	3 (1.8%)	8 (4.3%)	1 (1.2%)	3 (1.3%)
	amplification	0 (0.0%)	1 (0.5%)	0 (0.0%)	0 (0.0%)
MYB	0	162 (96.4%)	170 (90.4%)	79 (97.5%)	211 (94.2%)
	deletion	3 (1.8%)	9 (4.8%)	1 (1.2%)	10 (4.5%)
	unknown	3 (1.8%)	8 (4.3%)	1 (1.2%)	3 (1.3%)
	amplification	0 (0.0%)	1 (0.5%)	0 (0.0%)	0 (0.0%)
MYBL1	0	165 (98.2%)	180 (95.7%)	79 (97.5%)	216 (96.4%)
	amplification	0 (0.0%)	0 (0.0%)	0 (0.0%)	2 (0.9%)
	deletion	0 (0.0%)	0 (0.0%)	1 (1.2%)	3 (1.3%)
	unknown	3 (1.8%)	8 (4.3%)	1 (1.2%)	3 (1.3%)
