# Supplementary material for: Deciphering of Adult Glioma Vulnerabilities through Expression Pattern Analysis of GABA, Glutamate and Calcium Neurotransmitter Genes
Source: J Pers Med. 2022 Apr 14;12(4):633. doi: 10.3390/jpm12040633 (PMC9030730; doi:10.3390/jpm12040633)
Supplement: Supplementary file 1 [file jpm-12-00633-s001.zip › supplementary_data_tableS4_DE_gene_counting.xlsx]

## Sheet: DE_counting_data
Supplementary data Table S4. Distribution of overexpressed and underexpressed neurotransmission-related genes in NT-1-4 gliomas.
	Pathway	Cluster Name	Gene Number	Ratio	Percentage
Under-expressed Genes	CALCIUM_endocrine	NT-1	0	0/23	0
underexpression	CALCIUM_endocrine	NT-2	14	14/23	60.87
underexpression	CALCIUM_endocrine	NT-3	8	8/23	34.78
underexpression	CALCIUM_endocrine	NT-4	1	1/23	4.35
underexpression	CALCIUM_signaling	NT-1	8	8/132	6.06
underexpression	CALCIUM_signaling	NT-2	60	60/132	45.45
underexpression	CALCIUM_signaling	NT-3	49	49/132	37.12
underexpression	CALCIUM_signaling	NT-4	15	15/132	11.36
underexpression	GABA_synapse	NT-1	1	1/55	1.82
underexpression	GABA_synapse	NT-2	36	36/55	65.45
underexpression	GABA_synapse	NT-3	10	10/55	18.18
underexpression	GABA_synapse	NT-4	8	8/55	14.55
underexpression	GLUTAMATE_metabolism	NT-1	1	1/15	6.67
underexpression	GLUTAMATE_metabolism	NT-2	7	7/15	46.67
underexpression	GLUTAMATE_metabolism	NT-3	4	4/15	26.67
underexpression	GLUTAMATE_metabolism	NT-4	3	3/15	20
underexpression	GLUTAMATE_synapse	NT-1	0	0/65	0
underexpression	GLUTAMATE_synapse	NT-2	48	48/65	73.85
underexpression	GLUTAMATE_synapse	NT-3	13	13/65	20
underexpression	GLUTAMATE_synapse	NT-4	4	4/65	6.15
Over-expression Genes	CALCIUM_endocrine	NT-1	15	15/23	65.22
overexpression	CALCIUM_endocrine	NT-2	5	5/23	21.74
overexpression	CALCIUM_endocrine	NT-3	3	3/23	13.04
overexpression	CALCIUM_endocrine	NT-4	0	0/23	0
overexpression	CALCIUM_signaling	NT-1	70	70/132	53.03
overexpression	CALCIUM_signaling	NT-2	40	40/132	30.3
overexpression	CALCIUM_signaling	NT-3	13	13/132	9.85
overexpression	CALCIUM_signaling	NT-4	9	9/132	6.82
overexpression	GABA_synapse	NT-1	41	41/55	74.55
overexpression	GABA_synapse	NT-2	6	6/55	10.91
overexpression	GABA_synapse	NT-3	7	7/55	12.73
overexpression	GABA_synapse	NT-4	1	1/55	1.82
overexpression	GLUTAMATE_metabolism	NT-1	8	8/15	53.33
overexpression	GLUTAMATE_metabolism	NT-2	2	2/15	13.33
overexpression	GLUTAMATE_metabolism	NT-3	2	2/15	13.33
overexpression	GLUTAMATE_metabolism	NT-4	3	3/15	20
overexpression	GLUTAMATE_synapse	NT-1	43	43/65	66.15
overexpression	GLUTAMATE_synapse	NT-2	7	7/65	10.77
overexpression	GLUTAMATE_synapse	NT-3	12	12/65	18.46
overexpression	GLUTAMATE_synapse	NT-4	3	3/65	4.62
