# Supplementary material for: Deciphering of Adult Glioma Vulnerabilities through Expression Pattern Analysis of GABA, Glutamate and Calcium Neurotransmitter Genes
Source: J Pers Med. 2022 Apr 14;12(4):633. doi: 10.3390/jpm12040633 (PMC9030730; doi:10.3390/jpm12040633)
Supplement: Supplementary file 1 [file jpm-12-00633-s001.zip › supplementary_data_tableS5_mirna_average_expression.xlsx]

## Sheet: supplementary_data_tableS5_mirn
Supplementary Data Table S5. Average expression levels of 73 differentially expressed miRNAs in NT-1-4 gliomas.
variable	cluster	expression_average_cluster
hsa-mir-1-1	NT-4	3.40903
hsa-mir-1-1	NT-2	3.28398
hsa-mir-1-1	NT-1	4.54476
hsa-mir-1-1	NT-3	3.99541
hsa-mir-100	NT-4	15.7216
hsa-mir-100	NT-2	16.2173
hsa-mir-100	NT-1	15.2241
hsa-mir-100	NT-3	15.4264
hsa-mir-1179	NT-4	2.7579
hsa-mir-1179	NT-2	3.05644
hsa-mir-1179	NT-1	3.56657
hsa-mir-1179	NT-3	3.73039
hsa-mir-1197	NT-4	1.74708
hsa-mir-1197	NT-2	1.80547
hsa-mir-1197	NT-1	2.86823
hsa-mir-1197	NT-3	1.56951
hsa-mir-1229	NT-4	2.78492
hsa-mir-1229	NT-2	2.28652
hsa-mir-1229	NT-1	3.62887
hsa-mir-1229	NT-3	2.39032
hsa-mir-1248	NT-4	2.72082
hsa-mir-1248	NT-2	3.49134
hsa-mir-1248	NT-1	2.37654
hsa-mir-1248	NT-3	2.3655
hsa-mir-1264	NT-4	1.99892
hsa-mir-1264	NT-2	1.87861
hsa-mir-1264	NT-1	2.69695
hsa-mir-1264	NT-3	1.89779
hsa-mir-1269a	NT-4	2.10002
hsa-mir-1269a	NT-2	2.44196
hsa-mir-1269a	NT-1	2.72743
hsa-mir-1269a	NT-3	2.02377
hsa-mir-1275	NT-4	2.14271
hsa-mir-1275	NT-2	1.22218
hsa-mir-1275	NT-1	1.82739
hsa-mir-1275	NT-3	2.26393
hsa-mir-128-2	NT-4	11.2584
hsa-mir-128-2	NT-2	10.1682
hsa-mir-128-2	NT-1	12.5338
hsa-mir-128-2	NT-3	11.7847
hsa-mir-1284	NT-4	1.88775
hsa-mir-1284	NT-2	1.30026
hsa-mir-1284	NT-1	1.54936
hsa-mir-1284	NT-3	1.44298
hsa-mir-1291	NT-4	2.54502
hsa-mir-1291	NT-2	2.33499
hsa-mir-1291	NT-1	2.59351
hsa-mir-1291	NT-3	3.2014
hsa-mir-1296	NT-4	7.963
hsa-mir-1296	NT-2	6.13586
hsa-mir-1296	NT-1	8.06026
hsa-mir-1296	NT-3	7.7022
hsa-mir-133b	NT-4	1.89697
hsa-mir-133b	NT-2	1.81243
hsa-mir-133b	NT-1	2.83898
hsa-mir-133b	NT-3	2.23499
hsa-mir-138-1	NT-4	6.09842
hsa-mir-138-1	NT-2	5.31667
hsa-mir-138-1	NT-1	7.49041
hsa-mir-138-1	NT-3	6.56983
hsa-mir-146b	NT-4	9.29324
hsa-mir-146b	NT-2	10.8461
hsa-mir-146b	NT-1	9.73629
hsa-mir-146b	NT-3	9.47801
hsa-mir-149	NT-4	9.10766
hsa-mir-149	NT-2	9.48057
hsa-mir-149	NT-1	9.90446
hsa-mir-149	NT-3	8.58413
hsa-mir-15b	NT-4	8.93043
hsa-mir-15b	NT-2	9.83263
hsa-mir-15b	NT-1	8.56939
hsa-mir-15b	NT-3	9.19746
hsa-mir-183	NT-4	13.039
hsa-mir-183	NT-2	11.189
hsa-mir-183	NT-1	12.7721
hsa-mir-183	NT-3	13.7131
hsa-mir-186	NT-4	10.1045
hsa-mir-186	NT-2	9.74707
hsa-mir-186	NT-1	9.24928
hsa-mir-186	NT-3	8.83971
hsa-mir-196a-1	NT-4	1.65495
hsa-mir-196a-1	NT-2	4.4154
hsa-mir-196a-1	NT-1	1.22583
hsa-mir-196a-1	NT-3	1.25066
hsa-mir-1976	NT-4	4.44833
hsa-mir-1976	NT-2	5.35203
hsa-mir-1976	NT-1	4.30647
hsa-mir-1976	NT-3	4.15026
hsa-mir-206	NT-4	2.59027
hsa-mir-206	NT-2	2.0869
hsa-mir-206	NT-1	2.69435
hsa-mir-206	NT-3	3.27903
hsa-mir-218-2	NT-4	5.83339
hsa-mir-218-2	NT-2	6.12197
hsa-mir-218-2	NT-1	8.35271
hsa-mir-218-2	NT-3	5.89788
hsa-mir-221	NT-4	7.40981
hsa-mir-221	NT-2	9.09652
hsa-mir-221	NT-1	8.75452
hsa-mir-221	NT-3	7.3124
hsa-mir-23a	NT-4	12.1552
hsa-mir-23a	NT-2	12.7384
hsa-mir-23a	NT-1	11.3554
hsa-mir-23a	NT-3	11.5698
hsa-mir-301a	NT-4	7.77075
hsa-mir-301a	NT-2	6.85755
hsa-mir-301a	NT-1	6.91422
hsa-mir-301a	NT-3	6.63624
hsa-mir-31	NT-4	2.53736
hsa-mir-31	NT-2	3.93926
hsa-mir-31	NT-1	3.87828
hsa-mir-31	NT-3	2.51064
hsa-mir-3170	NT-4	2.64862
hsa-mir-3170	NT-2	2.10845
hsa-mir-3170	NT-1	2.10851
hsa-mir-3170	NT-3	1.95302
hsa-mir-3200	NT-4	7.44569
hsa-mir-3200	NT-2	6.51851
hsa-mir-3200	NT-1	8.07784
hsa-mir-3200	NT-3	6.89363
hsa-mir-320c-1	NT-4	2.77453
hsa-mir-320c-1	NT-2	2.90661
hsa-mir-320c-1	NT-1	2.16389
hsa-mir-320c-1	NT-3	2.73527
hsa-mir-326	NT-4	5.07748
hsa-mir-326	NT-2	4.16158
hsa-mir-326	NT-1	5.68907
hsa-mir-326	NT-3	4.70153
hsa-mir-346	NT-4	5.4519
hsa-mir-346	NT-2	4.16333
hsa-mir-346	NT-1	5.80731
hsa-mir-346	NT-3	5.56425
hsa-mir-3612	NT-4	1.63502
hsa-mir-3612	NT-2	1.07079
hsa-mir-3612	NT-1	1.5857
hsa-mir-3612	NT-3	1.58442
hsa-mir-3662	NT-4	1.16758
hsa-mir-3662	NT-2	1.52643
hsa-mir-3662	NT-1	1.05008
hsa-mir-3662	NT-3	1.18613
hsa-mir-378a	NT-4	8.83546
hsa-mir-378a	NT-2	9.43112
hsa-mir-378a	NT-1	9.15395
hsa-mir-378a	NT-3	9.88917
hsa-mir-3919	NT-4	1.20678
hsa-mir-3919	NT-2	1.08312
hsa-mir-3919	NT-1	1.61636
hsa-mir-3919	NT-3	1.91171
hsa-mir-3943	NT-4	2.54711
hsa-mir-3943	NT-2	1.96659
hsa-mir-3943	NT-1	3.90258
hsa-mir-3943	NT-3	3.08859
hsa-mir-429	NT-4	1.84529
hsa-mir-429	NT-2	2.65032
hsa-mir-429	NT-1	1.75785
hsa-mir-429	NT-3	1.51624
hsa-mir-4421	NT-4	1.28759
hsa-mir-4421	NT-2	2.11955
hsa-mir-4421	NT-1	1.23313
hsa-mir-4421	NT-3	1.21655
hsa-mir-4424	NT-4	2.2772
hsa-mir-4424	NT-2	1.3496
hsa-mir-4424	NT-1	1.78442
hsa-mir-4424	NT-3	1.77228
hsa-mir-448	NT-4	1.54316
hsa-mir-448	NT-2	1.4493
hsa-mir-448	NT-1	2.44146
hsa-mir-448	NT-3	1.35164
hsa-mir-4484	NT-4	1.1712
hsa-mir-4484	NT-2	1.5653
hsa-mir-4484	NT-1	1.48622
hsa-mir-4484	NT-3	1.3978
hsa-mir-449a	NT-4	0.96889
hsa-mir-449a	NT-2	1.26614
hsa-mir-449a	NT-1	1.15544
hsa-mir-449a	NT-3	0.890823
hsa-mir-4533	NT-4	0.98313
hsa-mir-4533	NT-2	1.44277
hsa-mir-4533	NT-1	1.18924
hsa-mir-4533	NT-3	0.987844
hsa-mir-455	NT-4	8.43368
hsa-mir-455	NT-2	9.01271
hsa-mir-455	NT-1	7.80426
hsa-mir-455	NT-3	6.77755
hsa-mir-4654	NT-4	1.43
hsa-mir-4654	NT-2	1.51666
hsa-mir-4654	NT-1	1.0705
hsa-mir-4654	NT-3	1.00898
hsa-mir-4660	NT-4	2.28962
hsa-mir-4660	NT-2	2.70472
hsa-mir-4660	NT-1	1.99921
hsa-mir-4660	NT-3	2.12688
hsa-mir-4705	NT-4	2.96274
hsa-mir-4705	NT-2	2.00239
hsa-mir-4705	NT-1	3.05227
hsa-mir-4705	NT-3	3.3097
hsa-mir-496	NT-4	3.87083
hsa-mir-496	NT-2	4.25151
hsa-mir-496	NT-1	5.61851
hsa-mir-496	NT-3	3.84857
hsa-mir-503	NT-4	5.0478
hsa-mir-503	NT-2	5.60034
hsa-mir-503	NT-1	4.84536
hsa-mir-503	NT-3	5.15017
hsa-mir-543	NT-4	3.79385
hsa-mir-543	NT-2	3.79112
hsa-mir-543	NT-1	5.17755
hsa-mir-543	NT-3	3.63047
hsa-mir-544a	NT-4	1.20601
hsa-mir-544a	NT-2	1.35487
hsa-mir-544a	NT-1	2.03919
hsa-mir-544a	NT-3	1.1845
hsa-mir-548aw	NT-4	2.10182
hsa-mir-548aw	NT-2	1.71992
hsa-mir-548aw	NT-1	2.03993
hsa-mir-548aw	NT-3	2.34371
hsa-mir-548ba	NT-4	3.42427
hsa-mir-548ba	NT-2	1.87153
hsa-mir-548ba	NT-1	2.43029
hsa-mir-548ba	NT-3	2.36881
hsa-mir-5680	NT-4	1.41135
hsa-mir-5680	NT-2	1.33393
hsa-mir-5680	NT-1	1.87311
hsa-mir-5680	NT-3	1.56835
hsa-mir-5698	NT-4	2.02491
hsa-mir-5698	NT-2	2.08561
hsa-mir-5698	NT-1	1.58105
hsa-mir-5698	NT-3	1.40346
hsa-mir-592	NT-4	5.64391
hsa-mir-592	NT-2	5.4887
hsa-mir-592	NT-1	6.68054
hsa-mir-592	NT-3	6.94824
hsa-mir-599	NT-4	1.54476
hsa-mir-599	NT-2	2.40812
hsa-mir-599	NT-1	1.20952
hsa-mir-599	NT-3	0.947725
hsa-mir-615	NT-4	1.12365
hsa-mir-615	NT-2	2.14747
hsa-mir-615	NT-1	0.990169
hsa-mir-615	NT-3	0.908946
hsa-mir-6860	NT-4	1.15347
hsa-mir-6860	NT-2	1.07022
hsa-mir-6860	NT-1	1.69797
hsa-mir-6860	NT-3	1.12753
hsa-mir-744	NT-4	8.81591
hsa-mir-744	NT-2	8.05521
hsa-mir-744	NT-1	9.13585
hsa-mir-744	NT-3	8.51339
hsa-mir-766	NT-4	4.3039
hsa-mir-766	NT-2	4.98837
hsa-mir-766	NT-1	5.70815
hsa-mir-766	NT-3	4.34592
hsa-mir-769	NT-4	7.53701
hsa-mir-769	NT-2	7.55886
hsa-mir-769	NT-1	8.4787
hsa-mir-769	NT-3	7.15364
hsa-mir-7702	NT-4	2.3925
hsa-mir-7702	NT-2	2.2223
hsa-mir-7702	NT-1	1.83022
hsa-mir-7702	NT-3	1.71479
hsa-mir-7705	NT-4	1.24631
hsa-mir-7705	NT-2	1.97339
hsa-mir-7705	NT-1	1.16597
hsa-mir-7705	NT-3	1.22563
hsa-mir-891b	NT-4	2.96908
hsa-mir-891b	NT-2	2.81782
hsa-mir-891b	NT-1	3.2656
hsa-mir-891b	NT-3	4.15629
hsa-mir-892a	NT-4	4.04897
hsa-mir-892a	NT-2	3.60998
hsa-mir-892a	NT-1	4.40935
hsa-mir-892a	NT-3	5.65724
hsa-mir-892b	NT-4	2.46906
hsa-mir-892b	NT-2	2.1415
hsa-mir-892b	NT-1	2.61435
hsa-mir-892b	NT-3	3.62811
hsa-mir-935	NT-4	7.60054
hsa-mir-935	NT-2	7.21099
hsa-mir-935	NT-1	8.8635
hsa-mir-935	NT-3	7.86023
hsa-mir-940	NT-4	4.47479
hsa-mir-940	NT-2	4.47856
hsa-mir-940	NT-1	5.0031
hsa-mir-940	NT-3	4.10351
hsa-mir-944	NT-4	1.16757
hsa-mir-944	NT-2	1.84759
hsa-mir-944	NT-1	1.20725
hsa-mir-944	NT-3	1.26488
hsa-mir-96	NT-4	5.61734
hsa-mir-96	NT-2	3.89948
hsa-mir-96	NT-1	5.51889
hsa-mir-96	NT-3	6.50768
