# Supplementary material for: Deciphering of Adult Glioma Vulnerabilities through Expression Pattern Analysis of GABA, Glutamate and Calcium Neurotransmitter Genes
Source: J Pers Med. 2022 Apr 14;12(4):633. doi: 10.3390/jpm12040633 (PMC9030730; doi:10.3390/jpm12040633)
Supplement: Supplementary file 1 [file jpm-12-00633-s001.zip › supplementary_data_tableS6_neurotransmission_correlations.xlsx]

## Sheet: significant_positive_correlatio
Supplementary data Table S6. Positive and negative correlations between CHRM1, CHRM3 and GRIN-1 genes and non-related neurotransmission genes.
gene_of_interest	target	pearson	pvalue	adj_pval
ENSG00000133019	ENSG00000133019.10	1	0	0
ENSG00000168539	ENSG00000168539.3	1	0	0
ENSG00000176884	ENSG00000176884.13	1	0	0
ENSG00000176884	ENSG00000145920.13	0.926075	6.53618e-288	4.97076e-284
ENSG00000168539	ENSG00000008056.11	0.920435	1.45932e-277	1.10981e-273
ENSG00000176884	ENSG00000101489.17	0.919115	2.99398e-275	2.27692e-271
ENSG00000176884	ENSG00000100604.11	0.914712	8.1195e-268	6.17488e-264
ENSG00000168539	ENSG00000101489.17	0.913822	2.31312e-266	1.75913e-262
ENSG00000176884	ENSG00000166111.8	0.910899	1.07291e-261	8.15949e-258
ENSG00000176884	ENSG00000167281.17	0.910368	7.26153e-261	5.52239e-257
ENSG00000168539	ENSG00000176884.13	0.910337	8.12776e-261	6.18116e-257
ENSG00000176884	ENSG00000168539.3	0.910337	8.12776e-261	6.18116e-257
ENSG00000168539	ENSG00000145920.13	0.909724	7.2543e-260	5.51689e-256
ENSG00000176884	ENSG00000113327.13	0.909149	5.58913e-259	4.25054e-255
ENSG00000176884	ENSG00000008056.11	0.905348	2.91584e-253	2.2175e-249
ENSG00000168539	ENSG00000100604.11	0.896434	9.41098e-241	7.15705e-237
ENSG00000168539	ENSG00000074317.9	0.895655	1.02848e-239	7.82159e-236
ENSG00000176884	ENSG00000074317.9	0.893762	3.18376e-237	2.42125e-233
ENSG00000176884	ENSG00000107147.10	0.892535	1.23459e-235	9.38906e-232
ENSG00000168539	ENSG00000166111.8	0.891507	2.55785e-234	1.94524e-230
ENSG00000176884	ENSG00000118160.12	0.891336	4.22104e-234	3.2101e-230
ENSG00000168539	ENSG00000152932.7	0.890401	6.44904e-233	4.90449e-229
ENSG00000168539	ENSG00000102003.9	0.88892	4.5997e-231	3.49807e-227
ENSG00000168539	ENSG00000132639.11	0.888884	5.09937e-231	3.87807e-227
ENSG00000168539	ENSG00000099365.8	0.888229	3.29147e-230	2.50316e-226
ENSG00000176884	ENSG00000213424.7	0.887711	1.43114e-229	1.08838e-225
ENSG00000168539	ENSG00000118160.12	0.885863	2.54188e-227	1.9331e-223
ENSG00000176884	ENSG00000196990.7	0.885697	4.03328e-227	3.06731e-223
ENSG00000176884	ENSG00000006116.3	0.885409	8.96533e-227	6.81813e-223
ENSG00000176884	ENSG00000132639.11	0.884624	7.80959e-226	5.9392e-222
ENSG00000168539	ENSG00000186487.16	0.883144	4.4304e-224	3.36932e-220
ENSG00000176884	ENSG00000075035.8	0.880718	2.95055e-221	2.24389e-217
ENSG00000168539	ENSG00000113327.13	0.880149	1.32855e-220	1.01036e-216
ENSG00000168539	ENSG00000059915.15	0.879663	4.78044e-220	3.63552e-216
ENSG00000176884	ENSG00000168993.13	0.879355	1.0716e-219	8.14952e-216
ENSG00000168539	ENSG00000164061.4	0.878842	4.09831e-219	3.11676e-215
ENSG00000168539	ENSG00000105649.8	0.878715	5.69512e-219	4.33114e-215
ENSG00000176884	ENSG00000186487.16	0.878209	2.12252e-218	1.61418e-214
ENSG00000176884	ENSG00000166006.11	0.877808	5.99714e-218	4.56082e-214
ENSG00000176884	ENSG00000101180.14	0.876089	4.91634e-216	3.73888e-212
ENSG00000176884	ENSG00000124140.11	0.876064	5.24044e-216	3.98535e-212
ENSG00000168539	ENSG00000136854.16	0.875828	9.55183e-216	7.26416e-212
ENSG00000176884	ENSG00000130643.7	0.875181	4.91353e-215	3.73674e-211
ENSG00000176884	ENSG00000059915.15	0.875025	7.28498e-215	5.54022e-211
ENSG00000168539	ENSG00000213424.7	0.874229	5.39278e-214	4.10121e-210
ENSG00000176884	ENSG00000022355.13	0.872824	1.77848e-212	1.35253e-208
ENSG00000176884	ENSG00000102003.9	0.871717	2.72067e-211	2.06907e-207
ENSG00000168539	ENSG00000019505.6	0.870828	2.38867e-210	1.81658e-206
ENSG00000168539	ENSG00000075035.8	0.870594	4.21416e-210	3.20487e-206
ENSG00000168539	ENSG00000107147.10	0.868964	2.15158e-208	1.63628e-204
ENSG00000168539	ENSG00000167281.17	0.868933	2.3149e-208	1.76048e-204
ENSG00000168539	ENSG00000124140.11	0.868577	5.43083e-208	4.13015e-204
ENSG00000176884	ENSG00000099365.8	0.868497	6.57171e-208	4.99779e-204
ENSG00000168539	ENSG00000116544.10	0.868151	1.49735e-207	1.13873e-203
ENSG00000168539	ENSG00000166006.11	0.868001	2.14367e-207	1.63026e-203
ENSG00000168539	ENSG00000127585.10	0.867928	2.5476e-207	1.93745e-203
ENSG00000176884	ENSG00000161681.14	0.867419	8.51643e-207	6.47675e-203
ENSG00000176884	ENSG00000164061.4	0.867197	1.43982e-206	1.09498e-202
ENSG00000168539	ENSG00000006116.3	0.866976	2.42236e-206	1.8422e-202
ENSG00000176884	ENSG00000067842.16	0.866778	3.86227e-206	2.93726e-202
ENSG00000176884	ENSG00000175766.10	0.866739	4.24045e-206	3.22486e-202
ENSG00000176884	ENSG00000120645.10	0.866249	1.3405e-205	1.01945e-201
ENSG00000168539	ENSG00000132932.15	0.865914	2.93589e-205	2.23274e-201
ENSG00000176884	ENSG00000152932.7	0.865904	3.0014e-205	2.28257e-201
ENSG00000168539	ENSG00000168993.13	0.865371	1.04111e-204	7.91767e-201
ENSG00000168539	ENSG00000175766.10	0.864948	2.77778e-204	2.1125e-200
ENSG00000176884	ENSG00000269935.1	0.864291	1.26982e-203	9.65701e-200
ENSG00000176884	ENSG00000197106.6	0.863543	7.09686e-203	5.39717e-199
ENSG00000168539	ENSG00000196990.7	0.862936	2.84765e-202	2.16564e-198
ENSG00000168539	ENSG00000197106.6	0.862065	2.06431e-201	1.56991e-197
ENSG00000168539	ENSG00000130643.7	0.861768	4.04616e-201	3.0771e-197
ENSG00000176884	ENSG00000105649.8	0.861648	5.29909e-201	4.02996e-197
ENSG00000168539	ENSG00000269935.1	0.861169	1.56076e-200	1.18696e-196
ENSG00000176884	ENSG00000157219.3	0.860152	1.52681e-199	1.16114e-195
ENSG00000168539	ENSG00000181418.7	0.859152	1.41253e-198	1.07423e-194
ENSG00000176884	ENSG00000139767.7	0.858199	1.15914e-197	8.81526e-194
ENSG00000168539	ENSG00000166448.13	0.857796	2.80382e-197	2.13231e-193
ENSG00000176884	ENSG00000178171.9	0.857677	3.64385e-197	2.77115e-193
ENSG00000168539	ENSG00000242173.7	0.857005	1.58095e-196	1.20231e-192
ENSG00000168539	ENSG00000157152.15	0.856936	1.83632e-196	1.39652e-192
ENSG00000168539	ENSG00000108309.11	0.856897	1.9996e-196	1.5207e-192
ENSG00000176884	ENSG00000136854.16	0.855948	1.568e-195	1.19246e-191
ENSG00000176884	ENSG00000242173.7	0.855349	5.71566e-195	4.34676e-191
ENSG00000176884	ENSG00000124493.12	0.85526	6.92549e-195	5.26684e-191
ENSG00000168539	ENSG00000223572.8	0.855198	7.90978e-195	6.01539e-191
ENSG00000168539	ENSG00000157782.8	0.854654	2.53778e-194	1.92998e-190
ENSG00000176884	ENSG00000124507.9	0.853277	4.77659e-193	3.6326e-189
ENSG00000176884	ENSG00000113100.8	0.852792	1.33196e-192	1.01295e-188
ENSG00000168539	ENSG00000237289.8	0.85232	3.60021e-192	2.73796e-188
ENSG00000176884	ENSG00000019505.6	0.851205	3.72797e-191	2.83512e-187
ENSG00000168539	ENSG00000161681.14	0.85112	4.44957e-191	3.3839e-187
ENSG00000168539	ENSG00000008735.13	0.851058	5.0661e-191	3.85277e-187
ENSG00000168539	ENSG00000279090.1	0.850991	5.8235e-191	4.42877e-187
ENSG00000168539	ENSG00000107954.9	0.850839	7.99788e-191	6.08238e-187
ENSG00000176884	ENSG00000132932.15	0.850405	1.96734e-190	1.49616e-186
ENSG00000168539	ENSG00000164076.15	0.849996	4.59108e-190	3.49152e-186
ENSG00000176884	ENSG00000130540.12	0.849734	7.90232e-190	6.00971e-186
ENSG00000176884	ENSG00000006740.15	0.849732	7.92196e-190	6.02465e-186
ENSG00000168539	ENSG00000178233.16	0.849382	1.63272e-189	1.24169e-185
ENSG00000176884	ENSG00000116254.16	0.84913	2.74034e-189	2.08403e-185
ENSG00000176884	ENSG00000116544.10	0.848848	4.89283e-189	3.721e-185
ENSG00000168539	ENSG00000022355.13	0.848406	1.20964e-188	9.1993e-185
ENSG00000176884	ENSG00000100346.16	0.848402	1.22035e-188	9.28077e-185
ENSG00000176884	ENSG00000145198.13	0.848211	1.80073e-188	1.36945e-184
ENSG00000176884	ENSG00000127585.10	0.847852	3.74386e-188	2.84721e-184
ENSG00000168539	ENSG00000100346.16	0.847537	7.11151e-188	5.40831e-184
ENSG00000176884	ENSG00000181418.7	0.847461	8.29334e-188	6.30709e-184
ENSG00000168539	ENSG00000120645.10	0.847339	1.06401e-187	8.09176e-184
ENSG00000168539	ENSG00000215218.3	0.846667	4.14643e-187	3.15336e-183
ENSG00000176884	ENSG00000148798.8	0.846491	5.91283e-187	4.49671e-183
ENSG00000168539	ENSG00000157219.3	0.846361	7.6833e-187	5.84315e-183
ENSG00000168539	ENSG00000067842.16	0.845799	2.38014e-186	1.81009e-182
ENSG00000176884	ENSG00000157782.8	0.84569	2.96084e-186	2.25172e-182
ENSG00000168539	ENSG00000006740.15	0.844704	2.12189e-185	1.61369e-181
ENSG00000168539	ENSG00000113100.8	0.844585	2.68922e-185	2.04515e-181
ENSG00000176884	ENSG00000261675.1	0.844444	3.559e-185	2.70662e-181
ENSG00000168539	ENSG00000101180.14	0.843609	1.86432e-184	1.41782e-180
ENSG00000176884	ENSG00000166448.13	0.843149	4.62191e-184	3.51497e-180
ENSG00000168539	ENSG00000079841.17	0.843138	4.71629e-184	3.58674e-180
ENSG00000176884	ENSG00000159753.12	0.842962	6.68115e-184	5.08102e-180
ENSG00000176884	ENSG00000157152.15	0.842227	2.82095e-183	2.14533e-179
ENSG00000176884	ENSG00000008735.13	0.841725	7.53325e-183	5.72904e-179
ENSG00000168539	ENSG00000225465.8	0.841543	1.07347e-182	8.16375e-179
ENSG00000176884	ENSG00000148408.11	0.840849	4.13202e-182	3.1424e-178
ENSG00000168539	ENSG00000168490.12	0.840563	7.20011e-182	5.47569e-178
ENSG00000168539	ENSG00000145198.13	0.839532	5.25484e-181	3.99631e-177
ENSG00000176884	ENSG00000104722.12	0.839229	9.39147e-181	7.14222e-177
ENSG00000168539	ENSG00000178171.9	0.83822	6.4554e-180	4.90933e-176
ENSG00000176884	ENSG00000178233.16	0.837811	1.40507e-179	1.06856e-175
ENSG00000168539	ENSG00000171450.5	0.837589	2.13918e-179	1.62685e-175
ENSG00000168539	ENSG00000159753.12	0.83677	1.00547e-178	7.6466e-175
ENSG00000176884	ENSG00000165643.9	0.836606	1.3714e-178	1.04295e-174
ENSG00000168539	ENSG00000176406.19	0.836055	3.86344e-178	2.93814e-174
ENSG00000176884	ENSG00000186732.12	0.83554	1.01302e-177	7.70398e-174
ENSG00000168539	ENSG00000182674.5	0.835483	1.12631e-177	8.56561e-174
ENSG00000168539	ENSG00000186642.14	0.834298	1.02261e-176	7.77697e-173
ENSG00000176884	ENSG00000145864.11	0.83425	1.11807e-176	8.50288e-173
ENSG00000176884	ENSG00000225465.8	0.834198	1.23119e-176	9.36317e-173
ENSG00000168539	ENSG00000154118.11	0.83406	1.58881e-176	1.20829e-172
ENSG00000133019	ENSG00000171617.12	0.832704	1.93251e-175	1.46968e-171
ENSG00000176884	ENSG00000225978.3	0.832617	2.26914e-175	1.72568e-171
ENSG00000168539	ENSG00000138944.7	0.832404	3.35221e-175	2.54935e-171
ENSG00000168539	ENSG00000139767.7	0.832194	4.91622e-175	3.73879e-171
ENSG00000168539	ENSG00000130540.12	0.832106	5.77636e-175	4.39292e-171
ENSG00000176884	ENSG00000141668.8	0.832093	5.92183e-175	4.50355e-171
ENSG00000168539	ENSG00000116254.16	0.831974	7.36119e-175	5.59819e-171
ENSG00000168539	ENSG00000166257.7	0.831008	4.26283e-174	3.24188e-170
ENSG00000176884	ENSG00000225110.1	0.830674	7.81854e-174	5.946e-170
ENSG00000176884	ENSG00000168490.12	0.830626	8.52876e-174	6.48612e-170
ENSG00000176884	ENSG00000147676.12	0.830336	1.4405e-173	1.0955e-169
ENSG00000168539	ENSG00000186732.12	0.829947	2.90271e-173	2.20751e-169
ENSG00000168539	ENSG00000141668.8	0.829913	3.08502e-173	2.34616e-169
ENSG00000176884	ENSG00000078328.18	0.829296	9.3507e-173	7.11121e-169
ENSG00000176884	ENSG00000164588.4	0.828816	2.21224e-172	1.68241e-168
ENSG00000176884	ENSG00000182674.5	0.828624	3.11465e-172	2.36869e-168
ENSG00000176884	ENSG00000132872.10	0.827822	1.30096e-171	9.89378e-168
ENSG00000168539	ENSG00000124507.9	0.827707	1.59521e-171	1.21316e-167
ENSG00000168539	ENSG00000148798.8	0.827476	2.40436e-171	1.82852e-167
ENSG00000168539	ENSG00000065609.13	0.826718	9.18191e-171	6.98285e-167
ENSG00000176884	ENSG00000215218.3	0.82641	1.57889e-170	1.20075e-166
ENSG00000176884	ENSG00000119946.10	0.826242	2.12204e-170	1.61381e-166
ENSG00000176884	ENSG00000107954.9	0.826206	2.26089e-170	1.71941e-166
ENSG00000168539	ENSG00000078328.18	0.825734	5.18129e-170	3.94037e-166
ENSG00000168539	ENSG00000225110.1	0.825564	6.97723e-170	5.30618e-166
ENSG00000176884	ENSG00000261678.2	0.825553	7.11106e-170	5.40796e-166
ENSG00000176884	ENSG00000187730.7	0.825136	1.47555e-169	1.12215e-165
ENSG00000168539	ENSG00000163013.10	0.824572	3.9452e-169	3.00033e-165
ENSG00000176884	ENSG00000237289.8	0.824325	6.05973e-169	4.60842e-165
ENSG00000168539	ENSG00000183775.9	0.824258	6.80046e-169	5.17175e-165
ENSG00000168539	ENSG00000278195.1	0.823748	1.64686e-168	1.25244e-164
ENSG00000168539	ENSG00000119946.10	0.823684	1.83941e-168	1.39887e-164
ENSG00000176884	ENSG00000171450.5	0.823199	4.25758e-168	3.23789e-164
ENSG00000176884	ENSG00000108309.11	0.822624	1.14523e-167	8.70951e-164
ENSG00000176884	ENSG00000104888.8	0.822475	1.47895e-167	1.12474e-163
ENSG00000176884	ENSG00000176406.19	0.822111	2.76226e-167	2.1007e-163
ENSG00000168539	ENSG00000113763.9	0.822062	3.00386e-167	2.28444e-163
ENSG00000168539	ENSG00000129990.13	0.821476	8.18173e-167	6.2222e-163
ENSG00000168539	ENSG00000122733.12	0.82146	8.41126e-167	6.39676e-163
ENSG00000168539	ENSG00000132872.10	0.821342	1.02723e-166	7.81205e-163
ENSG00000168539	ENSG00000147676.12	0.821302	1.10081e-166	8.37163e-163
ENSG00000176884	ENSG00000125814.16	0.820842	2.40722e-166	1.83069e-162
ENSG00000176884	ENSG00000185518.10	0.820689	3.12299e-166	2.37504e-162
ENSG00000176884	ENSG00000183654.8	0.820481	4.44215e-166	3.37826e-162
ENSG00000168539	ENSG00000067715.12	0.820419	4.93637e-166	3.75411e-162
ENSG00000168539	ENSG00000100321.13	0.820253	6.5409e-166	4.97435e-162
ENSG00000176884	ENSG00000172782.10	0.820114	8.27199e-166	6.29085e-162
ENSG00000176884	ENSG00000168830.7	0.819813	1.37611e-165	1.04653e-161
ENSG00000176884	ENSG00000186642.14	0.819465	2.47674e-165	1.88356e-161
ENSG00000168539	ENSG00000144834.11	0.819421	2.66827e-165	2.02922e-161
ENSG00000176884	ENSG00000223572.8	0.819367	2.92098e-165	2.22141e-161
ENSG00000176884	ENSG00000198626.14	0.819287	3.33966e-165	2.53981e-161
ENSG00000168539	ENSG00000177511.5	0.819088	4.66958e-165	3.55121e-161
ENSG00000168539	ENSG00000233508.2	0.818766	8.0227e-165	6.10126e-161
ENSG00000176884	ENSG00000151952.13	0.81858	1.09526e-164	8.32945e-161
ENSG00000168539	ENSG00000161082.11	0.818381	1.5297e-164	1.16334e-160
ENSG00000168539	ENSG00000104722.12	0.818071	2.56909e-164	1.9538e-160
ENSG00000176884	ENSG00000154118.11	0.818049	2.66218e-164	2.02459e-160
ENSG00000176884	ENSG00000065609.13	0.81796	3.0892e-164	2.34934e-160
ENSG00000168539	ENSG00000261675.1	0.817826	3.86828e-164	2.94183e-160
ENSG00000168539	ENSG00000110786.16	0.817661	5.09019e-164	3.87109e-160
ENSG00000168539	ENSG00000165643.9	0.817342	8.66349e-164	6.58859e-160
ENSG00000168539	ENSG00000125814.16	0.817275	9.68354e-164	7.36433e-160
ENSG00000176884	ENSG00000136750.10	0.817238	1.02935e-163	7.82822e-160
ENSG00000176884	ENSG00000279090.1	0.817154	1.18372e-163	9.00218e-160
ENSG00000168539	ENSG00000260230.2	0.816922	1.73792e-163	1.32169e-159
ENSG00000168539	ENSG00000124493.12	0.816771	2.23299e-163	1.69819e-159
ENSG00000168539	ENSG00000198883.10	0.816288	4.96742e-163	3.77772e-159
ENSG00000176884	ENSG00000250366.2	0.81606	7.23565e-163	5.50272e-159
ENSG00000168539	ENSG00000105642.14	0.815922	9.08817e-163	6.91155e-159
ENSG00000168539	ENSG00000067606.14	0.815716	1.27701e-162	9.71165e-159
ENSG00000176884	ENSG00000113763.9	0.815699	1.31251e-162	9.98161e-159
ENSG00000168539	ENSG00000182901.14	0.815627	1.47908e-162	1.12484e-158
ENSG00000176884	ENSG00000166159.9	0.815257	2.71521e-162	2.06492e-158
ENSG00000176884	ENSG00000137766.15	0.815029	3.94955e-162	3.00364e-158
ENSG00000168539	ENSG00000145864.11	0.814963	4.39612e-162	3.34325e-158
ENSG00000176884	ENSG00000278195.1	0.814742	6.32105e-162	4.80716e-158
ENSG00000168539	ENSG00000127561.13	0.81473	6.44686e-162	4.90284e-158
ENSG00000176884	ENSG00000261340.1	0.814669	7.1215e-162	5.4159e-158
ENSG00000168539	ENSG00000170091.9	0.814572	8.33832e-162	6.34129e-158
ENSG00000176884	ENSG00000072657.7	0.814295	1.3129e-161	9.98457e-158
ENSG00000176884	ENSG00000177511.5	0.814029	2.02341e-161	1.5388e-157
ENSG00000176884	ENSG00000186297.10	0.813605	4.03957e-161	3.07209e-157
ENSG00000168539	ENSG00000166159.9	0.813063	9.72617e-161	7.39675e-157
ENSG00000168539	ENSG00000149927.16	0.812946	1.17595e-160	8.94312e-157
ENSG00000168539	ENSG00000105409.14	0.812519	2.34792e-160	1.78559e-156
ENSG00000176884	ENSG00000273079.3	0.81233	3.18302e-160	2.42069e-156
ENSG00000176884	ENSG00000138944.7	0.812319	3.2395e-160	2.46364e-156
ENSG00000168539	ENSG00000164588.4	0.812008	5.35197e-160	4.07017e-156
ENSG00000176884	ENSG00000011083.7	0.811924	6.12783e-160	4.66022e-156
ENSG00000168539	ENSG00000077080.8	0.810893	3.20171e-159	2.4349e-155
ENSG00000176884	ENSG00000110786.16	0.810835	3.51273e-159	2.67143e-155
ENSG00000176884	ENSG00000122733.12	0.81065	4.72148e-159	3.59068e-155
ENSG00000176884	ENSG00000101438.3	0.810522	5.79329e-159	4.4058e-155
ENSG00000176884	ENSG00000100321.13	0.810502	5.97672e-159	4.54529e-155
ENSG00000176884	ENSG00000236279.5	0.81036	7.49826e-159	5.70243e-155
ENSG00000168539	ENSG00000196972.7	0.809551	2.71564e-158	2.06524e-154
ENSG00000168539	ENSG00000273079.3	0.809369	3.62802e-158	2.75911e-154
ENSG00000168539	ENSG00000183780.11	0.808669	1.09718e-157	8.34407e-154
ENSG00000176884	ENSG00000169884.12	0.808453	1.54278e-157	1.17329e-153
ENSG00000176884	ENSG00000220575.6	0.808428	1.60526e-157	1.2208e-153
ENSG00000176884	ENSG00000204314.9	0.808363	1.77837e-157	1.35245e-153
ENSG00000168539	ENSG00000204314.9	0.808245	2.14149e-157	1.62861e-153
ENSG00000168539	ENSG00000151952.13	0.807958	3.36049e-157	2.55565e-153
ENSG00000168539	ENSG00000175874.8	0.807911	3.6178e-157	2.75134e-153
ENSG00000168539	ENSG00000204851.6	0.807899	3.68764e-157	2.80445e-153
ENSG00000176884	ENSG00000163630.9	0.807849	3.99018e-157	3.03453e-153
ENSG00000176884	ENSG00000204851.6	0.807782	4.43072e-157	3.36956e-153
ENSG00000176884	ENSG00000149927.16	0.80756	6.28418e-157	4.77912e-153
ENSG00000176884	ENSG00000175874.8	0.807486	7.05326e-157	5.364e-153
ENSG00000168539	ENSG00000168830.7	0.807444	7.53104e-157	5.72735e-153
ENSG00000168539	ENSG00000159409.13	0.80744	7.58697e-157	5.76989e-153
ENSG00000176884	ENSG00000171532.4	0.807259	1.00719e-156	7.6597e-153
ENSG00000176884	ENSG00000164076.15	0.806947	1.64033e-156	1.24747e-152
ENSG00000176884	ENSG00000233508.2	0.806837	1.94758e-156	1.48113e-152
ENSG00000168539	ENSG00000146360.8	0.806518	3.20516e-156	2.43753e-152
ENSG00000176884	ENSG00000129990.13	0.806462	3.49315e-156	2.65654e-152
ENSG00000176884	ENSG00000111218.10	0.806403	3.83107e-156	2.91353e-152
ENSG00000168539	ENSG00000160716.4	0.806158	5.60844e-156	4.26522e-152
ENSG00000176884	ENSG00000182901.14	0.80602	6.94952e-156	5.28511e-152
ENSG00000176884	ENSG00000164794.7	0.805976	7.44576e-156	5.6625e-152
ENSG00000168539	ENSG00000172782.10	0.805853	9.01404e-156	6.85518e-152
ENSG00000168539	ENSG00000177380.12	0.805801	9.77556e-156	7.43431e-152
ENSG00000176884	ENSG00000198010.10	0.805198	2.48834e-155	1.89238e-151
ENSG00000168539	ENSG00000273238.1	0.805186	2.53559e-155	1.92831e-151
ENSG00000176884	ENSG00000146360.8	0.804959	3.60126e-155	2.73876e-151
ENSG00000176884	ENSG00000176769.9	0.804629	5.98718e-155	4.55325e-151
ENSG00000168539	ENSG00000185518.10	0.804387	8.69116e-155	6.60962e-151
ENSG00000168539	ENSG00000198673.9	0.804335	9.41515e-155	7.16022e-151
ENSG00000176884	ENSG00000198883.10	0.804254	1.06759e-154	8.11899e-151
ENSG00000176884	ENSG00000170091.9	0.803881	1.89288e-154	1.43954e-150
ENSG00000168539	ENSG00000155980.10	0.803533	3.22541e-154	2.45292e-150
ENSG00000168539	ENSG00000002746.13	0.80344	3.72441e-154	2.83242e-150
ENSG00000168539	ENSG00000130558.17	0.80343	3.77843e-154	2.87349e-150
ENSG00000168539	ENSG00000183654.8	0.803413	3.87616e-154	2.94782e-150
ENSG00000168539	ENSG00000186297.10	0.803287	4.70264e-154	3.57636e-150
ENSG00000168539	ENSG00000130477.13	0.803267	4.85352e-154	3.6911e-150
ENSG00000168539	ENSG00000250366.2	0.803026	7.00722e-154	5.32899e-150
ENSG00000176884	ENSG00000079841.17	0.802998	7.3194e-154	5.56641e-150
ENSG00000176884	ENSG00000126583.9	0.802916	8.29788e-154	6.31054e-150
ENSG00000168539	ENSG00000225978.3	0.802757	1.057e-153	8.03846e-150
ENSG00000168539	ENSG00000183317.15	0.802676	1.19621e-153	9.09721e-150
ENSG00000176884	ENSG00000174473.14	0.802575	1.39524e-153	1.06108e-149
ENSG00000176884	ENSG00000198673.9	0.802424	1.75417e-153	1.33405e-149
ENSG00000168539	ENSG00000169884.12	0.802397	1.82934e-153	1.39122e-149
ENSG00000168539	ENSG00000187730.7	0.802112	2.82093e-153	2.14532e-149
ENSG00000176884	ENSG00000067715.12	0.80183	4.32632e-153	3.29017e-149
ENSG00000176884	ENSG00000077080.8	0.801661	5.59627e-153	4.25597e-149
ENSG00000176884	ENSG00000166862.6	0.80164	5.77283e-153	4.39024e-149
ENSG00000168539	ENSG00000236279.5	0.801556	6.55443e-153	4.98465e-149
ENSG00000176884	ENSG00000169933.11	0.801433	7.90047e-153	6.00831e-149
ENSG00000168539	ENSG00000116983.11	0.801042	1.42682e-152	1.0851e-148
ENSG00000168539	ENSG00000072657.7	0.800672	2.49365e-152	1.89642e-148
ENSG00000176884	ENSG00000074211.12	0.800586	2.83868e-152	2.15882e-148
ENSG00000168539	ENSG00000174521.7	0.799368	1.7671e-151	1.34388e-147
ENSG00000176884	ENSG00000273238.1	0.799321	1.89636e-151	1.44218e-147
ENSG00000168539	ENSG00000136531.12	0.799123	2.54874e-151	1.93831e-147
ENSG00000176884	ENSG00000215196.4	0.799112	2.58957e-151	1.96936e-147
ENSG00000168539	ENSG00000254746.4	0.798818	4.01534e-151	3.05366e-147
ENSG00000168539	ENSG00000060140.7	0.798562	5.88114e-151	4.4726e-147
ENSG00000176884	ENSG00000184388.5	0.79843	7.15374e-151	5.44042e-147
ENSG00000176884	ENSG00000166257.7	0.798278	8.97407e-151	6.82478e-147
ENSG00000168539	ENSG00000145990.9	0.798221	9.76119e-151	7.42338e-147
ENSG00000168539	ENSG00000272321.1	0.798166	1.05969e-150	8.0589e-147
ENSG00000168539	ENSG00000215196.4	0.798121	1.13404e-150	8.62437e-147
ENSG00000176884	ENSG00000196972.7	0.798104	1.16304e-150	8.84489e-147
ENSG00000168539	ENSG00000101438.3	0.797788	1.85718e-150	1.41239e-146
ENSG00000176884	ENSG00000164600.5	0.797782	1.87329e-150	1.42464e-146
ENSG00000176884	ENSG00000271892.1	0.797693	2.13847e-150	1.62631e-146
ENSG00000176884	ENSG00000254746.4	0.797579	2.53014e-150	1.92417e-146
ENSG00000168539	ENSG00000011083.7	0.797538	2.69108e-150	2.04656e-146
ENSG00000176884	ENSG00000177380.12	0.797458	3.029e-150	2.30355e-146
ENSG00000168539	ENSG00000164600.5	0.797145	4.80735e-150	3.65599e-146
ENSG00000168539	ENSG00000171509.14	0.796887	7.03557e-150	5.35055e-146
ENSG00000168539	ENSG00000126583.9	0.796675	9.62906e-150	7.3229e-146
ENSG00000168539	ENSG00000164794.7	0.796643	1.00926e-149	7.67545e-146
ENSG00000176884	ENSG00000163032.10	0.796545	1.16616e-149	8.86865e-146
ENSG00000168539	ENSG00000261678.2	0.796243	1.81701e-149	1.38183e-145
ENSG00000176884	ENSG00000260230.2	0.796066	2.35655e-149	1.79215e-145
ENSG00000168539	ENSG00000104888.8	0.796008	2.56792e-149	1.9529e-145
ENSG00000168539	ENSG00000110148.8	0.795623	4.51367e-149	3.43264e-145
ENSG00000176884	ENSG00000272321.1	0.795587	4.75752e-149	3.6181e-145
ENSG00000168539	ENSG00000261340.1	0.795579	4.81336e-149	3.66056e-145
ENSG00000176884	ENSG00000105409.14	0.795372	6.51683e-149	4.95605e-145
ENSG00000168539	ENSG00000220575.6	0.795317	7.05859e-149	5.36806e-145
ENSG00000168539	ENSG00000198626.14	0.7952	8.37662e-149	6.37042e-145
ENSG00000168539	ENSG00000103154.8	0.795154	8.96468e-149	6.81764e-145
ENSG00000168539	ENSG00000077264.13	0.795062	1.02435e-148	7.79016e-145
ENSG00000176884	ENSG00000116983.11	0.79506	1.02742e-148	7.81351e-145
ENSG00000176884	ENSG00000154478.3	0.794912	1.27679e-148	9.71002e-145
ENSG00000176884	ENSG00000103154.8	0.794809	1.48277e-148	1.12765e-144
ENSG00000176884	ENSG00000171509.14	0.79468	1.79011e-148	1.36138e-144
ENSG00000176884	ENSG00000132938.17	0.794564	2.11969e-148	1.61202e-144
ENSG00000168539	ENSG00000197753.8	0.794275	3.22731e-148	2.45437e-144
ENSG00000168539	ENSG00000151948.10	0.794147	3.88478e-148	2.95437e-144
ENSG00000168539	ENSG00000148408.11	0.794142	3.91635e-148	2.97839e-144
ENSG00000168539	ENSG00000174514.11	0.794121	4.03306e-148	3.06715e-144
ENSG00000176884	ENSG00000183317.15	0.793942	5.23283e-148	3.97957e-144
ENSG00000176884	ENSG00000163013.10	0.79382	6.24651e-148	4.75047e-144
ENSG00000168539	ENSG00000171532.4	0.793572	8.94896e-148	6.80569e-144
ENSG00000176884	ENSG00000162989.4	0.793553	9.19137e-148	6.99004e-144
ENSG00000176884	ENSG00000105642.14	0.792266	5.89152e-147	4.4805e-143
ENSG00000168539	ENSG00000070808.14	0.792003	8.59699e-147	6.53801e-143
ENSG00000168539	ENSG00000260838.3	0.79147	1.84444e-146	1.4027e-142
ENSG00000168539	ENSG00000132938.17	0.791461	1.8684e-146	1.42092e-142
ENSG00000176884	ENSG00000260328.1	0.791427	1.96184e-146	1.49198e-142
ENSG00000168539	ENSG00000154478.3	0.791425	1.96653e-146	1.49554e-142
ENSG00000168539	ENSG00000135709.11	0.79112	3.0408e-146	2.31253e-142
ENSG00000168539	ENSG00000260328.1	0.790994	3.64351e-146	2.77089e-142
ENSG00000168539	ENSG00000152954.10	0.790564	6.72145e-146	5.11166e-142
ENSG00000168539	ENSG00000174473.14	0.790318	9.54347e-146	7.25781e-142
ENSG00000176884	ENSG00000183780.11	0.789801	1.99027e-145	1.5136e-141
ENSG00000176884	ENSG00000127561.13	0.789046	5.79205e-145	4.40485e-141
ENSG00000168539	ENSG00000099960.11	0.789025	5.96694e-145	4.53786e-141
ENSG00000176884	ENSG00000099960.11	0.788919	6.92422e-145	5.26587e-141
ENSG00000168539	ENSG00000107105.13	0.788881	7.30586e-145	5.5561e-141
ENSG00000168539	ENSG00000111218.10	0.788851	7.62972e-145	5.80241e-141
ENSG00000168539	ENSG00000271892.1	0.788781	8.41763e-145	6.4016e-141
ENSG00000176884	ENSG00000135709.11	0.788462	1.31987e-144	1.00376e-140
ENSG00000176884	ENSG00000232903.2	0.788281	1.70288e-144	1.29504e-140
ENSG00000176884	ENSG00000060140.7	0.78815	2.04739e-144	1.55704e-140
ENSG00000176884	ENSG00000145990.9	0.788059	2.32476e-144	1.76798e-140
ENSG00000168539	ENSG00000129159.6	0.787998	2.53511e-144	1.92795e-140
ENSG00000168539	ENSG00000136750.10	0.78783	3.20606e-144	2.43821e-140
ENSG00000176884	ENSG00000257434.1	0.787675	3.98569e-144	3.03112e-140
ENSG00000176884	ENSG00000260837.1	0.787213	7.60921e-144	5.7868e-140
ENSG00000176884	ENSG00000110148.8	0.787152	8.29755e-144	6.31029e-140
ENSG00000168539	ENSG00000137766.15	0.786263	2.86655e-143	2.18001e-139
ENSG00000168539	ENSG00000281160.1	0.786253	2.90686e-143	2.21067e-139
ENSG00000176884	ENSG00000135638.12	0.786047	3.86899e-143	2.94237e-139
ENSG00000168539	ENSG00000040608.12	0.785825	5.26875e-143	4.00688e-139
ENSG00000176884	ENSG00000256008.2	0.78541	9.3658e-143	7.12269e-139
ENSG00000168539	ENSG00000257434.1	0.785337	1.03596e-142	7.8785e-139
ENSG00000176884	ENSG00000157064.9	0.785152	1.33848e-142	1.01791e-138
ENSG00000168539	ENSG00000074211.12	0.784585	2.92778e-142	2.22658e-138
ENSG00000176884	ENSG00000070808.14	0.78449	3.33623e-142	2.5372e-138
ENSG00000168539	ENSG00000163032.10	0.784412	3.71536e-142	2.82553e-138
ENSG00000168539	ENSG00000125851.8	0.784325	4.18664e-142	3.18394e-138
ENSG00000168539	ENSG00000196876.12	0.783988	6.66121e-142	5.06585e-138
ENSG00000176884	ENSG00000279117.1	0.783846	8.09504e-142	6.15628e-138
ENSG00000168539	ENSG00000248485.1	0.783723	9.58013e-142	7.28569e-138
ENSG00000168539	ENSG00000167037.17	0.783671	1.02885e-141	7.82443e-138
ENSG00000168539	ENSG00000184185.8	0.783508	1.28648e-141	9.78366e-138
ENSG00000168539	ENSG00000089199.8	0.783313	1.68233e-141	1.27941e-137
ENSG00000176884	ENSG00000224223.1	0.782712	3.82602e-141	2.90969e-137
ENSG00000168539	ENSG00000172209.5	0.782408	5.79356e-141	4.406e-137
ENSG00000176884	ENSG00000144460.11	0.782142	8.31365e-141	6.32253e-137
ENSG00000168539	ENSG00000168280.15	0.781737	1.44223e-140	1.09682e-136
ENSG00000176884	ENSG00000183775.9	0.781528	1.91514e-140	1.45646e-136
ENSG00000168539	ENSG00000176749.7	0.78142	2.21834e-140	1.68705e-136
ENSG00000176884	ENSG00000161082.11	0.780449	8.24741e-140	6.27215e-136
ENSG00000168539	ENSG00000232903.2	0.78026	1.06413e-139	8.09268e-136
ENSG00000168539	ENSG00000157064.9	0.780206	1.144e-139	8.70011e-136
ENSG00000176884	ENSG00000130477.13	0.780085	1.3471e-139	1.02447e-135
ENSG00000168539	ENSG00000120088.13	0.779907	1.71172e-139	1.30176e-135
ENSG00000176884	ENSG00000174514.11	0.779768	2.06284e-139	1.56879e-135
ENSG00000168539	ENSG00000184388.5	0.779722	2.19478e-139	1.66913e-135
ENSG00000168539	ENSG00000149575.5	0.779571	2.68841e-139	2.04454e-135
ENSG00000176884	ENSG00000197753.8	0.779535	2.82193e-139	2.14608e-135
ENSG00000168539	ENSG00000198216.9	0.779313	3.80169e-139	2.89119e-135
ENSG00000176884	ENSG00000151948.10	0.779291	3.91434e-139	2.97686e-135
ENSG00000168539	ENSG00000173898.10	0.779262	4.06939e-139	3.09477e-135
ENSG00000176884	ENSG00000107864.13	0.779241	4.18782e-139	3.18484e-135
ENSG00000168539	ENSG00000123901.7	0.778983	5.91153e-139	4.49572e-135
ENSG00000168539	ENSG00000213760.9	0.778809	7.46014e-139	5.67344e-135
ENSG00000168539	ENSG00000260837.1	0.778447	1.2112e-138	9.21118e-135
ENSG00000168539	ENSG00000198010.10	0.77822	1.6395e-138	1.24684e-134
ENSG00000168539	ENSG00000146469.11	0.778056	2.03905e-138	1.5507e-134
ENSG00000168539	ENSG00000183837.9	0.77793	2.41191e-138	1.83426e-134
ENSG00000176884	ENSG00000123901.7	0.777927	2.42247e-138	1.84229e-134
ENSG00000168539	ENSG00000166862.6	0.777865	2.62782e-138	1.99846e-134
ENSG00000176884	ENSG00000107105.13	0.777807	2.83904e-138	2.15909e-134
ENSG00000168539	ENSG00000092051.15	0.777431	4.6797e-138	3.55891e-134
ENSG00000168539	ENSG00000163630.9	0.777321	5.41909e-138	4.12122e-134
ENSG00000176884	ENSG00000136531.12	0.777196	6.3951e-138	4.86347e-134
ENSG00000168539	ENSG00000224223.1	0.77676	1.13883e-137	8.66078e-134
ENSG00000176884	ENSG00000167971.15	0.776639	1.33668e-137	1.01655e-133
ENSG00000176884	ENSG00000002746.13	0.776604	1.39985e-137	1.06459e-133
ENSG00000168539	ENSG00000279117.1	0.776314	2.05305e-137	1.56135e-133
ENSG00000176884	ENSG00000183837.9	0.776275	2.16314e-137	1.64507e-133
ENSG00000176884	ENSG00000108684.13	0.77623	2.29599e-137	1.7461e-133
ENSG00000168539	ENSG00000176769.9	0.775964	3.26037e-137	2.47951e-133
ENSG00000176884	ENSG00000248485.1	0.775837	3.85317e-137	2.93034e-133
ENSG00000168539	ENSG00000135638.12	0.775764	4.23913e-137	3.22386e-133
ENSG00000176884	ENSG00000152954.10	0.775731	4.43157e-137	3.37021e-133
ENSG00000168539	ENSG00000176840.10	0.775723	4.47587e-137	3.4039e-133
ENSG00000168539	ENSG00000259234.4	0.775702	4.59988e-137	3.49821e-133
ENSG00000176884	ENSG00000167037.17	0.775535	5.72977e-137	4.35749e-133
ENSG00000176884	ENSG00000260838.3	0.775405	6.79836e-137	5.17015e-133
ENSG00000176884	ENSG00000130558.17	0.775337	7.43767e-137	5.65635e-133
ENSG00000176884	ENSG00000067606.14	0.775089	1.02918e-136	7.82688e-133
ENSG00000168539	ENSG00000167971.15	0.775058	1.07205e-136	8.15291e-133
ENSG00000176884	ENSG00000281160.1	0.774327	2.7943e-136	2.12506e-132
ENSG00000168539	ENSG00000156486.7	0.774236	3.1445e-136	2.39139e-132
ENSG00000168539	ENSG00000248469.1	0.77377	5.77305e-136	4.3904e-132
ENSG00000168539	ENSG00000169933.11	0.773724	6.13093e-136	4.66258e-132
ENSG00000176884	ENSG00000267651.1	0.773598	7.22852e-136	5.49729e-132
ENSG00000168539	ENSG00000105376.4	0.773504	8.16108e-136	6.2065e-132
ENSG00000176884	ENSG00000236333.3	0.773488	8.339e-136	6.34181e-132
ENSG00000176884	ENSG00000160716.4	0.773442	8.85532e-136	6.73447e-132
ENSG00000168539	ENSG00000150672.15	0.773429	8.99959e-136	6.84419e-132
ENSG00000168539	ENSG00000256982.1	0.773251	1.13449e-135	8.62778e-132
ENSG00000168539	ENSG00000156564.8	0.773017	1.53822e-135	1.16982e-131
ENSG00000176884	ENSG00000248469.1	0.772858	1.89021e-135	1.43751e-131
ENSG00000176884	ENSG00000166206.12	0.772786	2.07507e-135	1.57809e-131
ENSG00000168539	ENSG00000130368.5	0.772749	2.17587e-135	1.65475e-131
ENSG00000176884	ENSG00000185924.6	0.772712	2.28297e-135	1.7362e-131
ENSG00000168539	ENSG00000162105.15	0.772712	2.2834e-135	1.73653e-131
ENSG00000133019	ENSG00000124134.7	0.772595	2.65813e-135	2.02151e-131
ENSG00000176884	ENSG00000155980.10	0.772574	2.7319e-135	2.07761e-131
ENSG00000176884	ENSG00000174145.7	0.772288	3.95412e-135	3.00711e-131
ENSG00000176884	ENSG00000181215.11	0.772102	5.02577e-135	3.82209e-131
ENSG00000168539	ENSG00000073670.12	0.772053	5.35978e-135	4.07611e-131
ENSG00000176884	ENSG00000273301.1	0.771801	7.41239e-135	5.63713e-131
ENSG00000168539	ENSG00000186377.7	0.771172	1.66776e-134	1.26833e-130
ENSG00000176884	ENSG00000102468.9	0.771122	1.77779e-134	1.35201e-130
ENSG00000168539	ENSG00000158806.12	0.771093	1.8441e-134	1.40244e-130
ENSG00000168539	ENSG00000152034.9	0.771042	1.97067e-134	1.4987e-130
ENSG00000176884	ENSG00000259234.4	0.770958	2.19507e-134	1.66935e-130
ENSG00000176884	ENSG00000184185.8	0.770873	2.44852e-134	1.8621e-130
ENSG00000176884	ENSG00000213760.9	0.770815	2.63722e-134	2.00561e-130
ENSG00000176884	ENSG00000089199.8	0.770531	3.79378e-134	2.88517e-130
ENSG00000168539	ENSG00000013293.5	0.770279	5.24183e-134	3.98641e-130
ENSG00000168539	ENSG00000187094.10	0.770144	6.22999e-134	4.73791e-130
ENSG00000168539	ENSG00000108684.13	0.769969	7.79343e-134	5.92691e-130
ENSG00000168539	ENSG00000198910.11	0.769403	1.60332e-133	1.21933e-129
ENSG00000176884	ENSG00000174469.16	0.769345	1.7277e-133	1.31392e-129
ENSG00000168539	ENSG00000174469.16	0.769157	2.19283e-133	1.66764e-129
ENSG00000168539	ENSG00000181215.11	0.769141	2.23802e-133	1.70201e-129
ENSG00000168539	ENSG00000120903.9	0.769029	2.58082e-133	1.96271e-129
ENSG00000168539	ENSG00000131242.14	0.768975	2.76651e-133	2.10393e-129
ENSG00000168539	ENSG00000184261.4	0.768957	2.82887e-133	2.15136e-129
ENSG00000176884	ENSG00000186288.5	0.768717	3.83823e-133	2.91898e-129
ENSG00000176884	ENSG00000279013.1	0.768679	4.02945e-133	3.0644e-129
ENSG00000168539	ENSG00000259964.5	0.768669	4.08096e-133	3.10357e-129
ENSG00000176884	ENSG00000168952.14	0.768644	4.20854e-133	3.20059e-129
ENSG00000176884	ENSG00000149575.5	0.768276	6.71181e-133	5.10433e-129
ENSG00000176884	ENSG00000187094.10	0.768262	6.8337e-133	5.19703e-129
ENSG00000176884	ENSG00000162105.15	0.768085	8.54825e-133	6.50095e-129
ENSG00000168539	ENSG00000186462.8	0.767903	1.07668e-132	8.18818e-129
ENSG00000168539	ENSG00000158748.3	0.767644	1.49389e-132	1.13611e-128
ENSG00000176884	ENSG00000172209.5	0.767625	1.52901e-132	1.16281e-128
ENSG00000168539	ENSG00000267651.1	0.767343	2.18317e-132	1.6603e-128
ENSG00000176884	ENSG00000129159.6	0.76726	2.42379e-132	1.84329e-128
ENSG00000176884	ENSG00000168280.15	0.767227	2.52764e-132	1.92227e-128
ENSG00000168539	ENSG00000164082.13	0.76681	4.2719e-132	3.24878e-128
ENSG00000176884	ENSG00000120088.13	0.766712	4.83417e-132	3.67638e-128
ENSG00000176884	ENSG00000109158.9	0.766685	4.99633e-132	3.79971e-128
ENSG00000176884	ENSG00000156486.7	0.766436	6.8342e-132	5.19741e-128
ENSG00000168539	ENSG00000102468.9	0.76623	8.84536e-132	6.7269e-128
ENSG00000176884	ENSG00000256982.1	0.766005	1.17377e-131	8.92649e-128
ENSG00000176884	ENSG00000146469.11	0.765625	1.88766e-131	1.43556e-127
ENSG00000176884	ENSG00000166501.11	0.76547	2.29188e-131	1.74298e-127
ENSG00000168539	ENSG00000185924.6	0.765424	2.42627e-131	1.84518e-127
ENSG00000176884	ENSG00000272163.1	0.76531	2.79839e-131	2.12817e-127
ENSG00000176884	ENSG00000277586.1	0.765294	2.85564e-131	2.17171e-127
ENSG00000168539	ENSG00000165868.11	0.764616	6.63991e-131	5.04965e-127
ENSG00000168539	ENSG00000136535.13	0.764336	9.40652e-131	7.15366e-127
ENSG00000168539	ENSG00000256008.2	0.764276	1.01372e-130	7.7093e-127
ENSG00000168539	ENSG00000160396.8	0.764208	1.10315e-130	8.38945e-127
ENSG00000168539	ENSG00000279013.1	0.764121	1.22899e-130	9.34645e-127
ENSG00000176884	ENSG00000123612.14	0.764029	1.37648e-130	1.04681e-126
ENSG00000176884	ENSG00000173267.12	0.763835	1.75199e-130	1.33239e-126
ENSG00000168539	ENSG00000149654.8	0.763761	1.92089e-130	1.46084e-126
ENSG00000176884	ENSG00000184261.4	0.76338	3.07492e-130	2.33848e-126
ENSG00000168539	ENSG00000174145.7	0.763341	3.22971e-130	2.4562e-126
ENSG00000176884	ENSG00000182255.6	0.763155	4.06417e-130	3.0908e-126
ENSG00000176884	ENSG00000159409.13	0.762979	5.0454e-130	3.83703e-126
ENSG00000176884	ENSG00000111344.10	0.762745	6.73282e-130	5.12031e-126
ENSG00000176884	ENSG00000136535.13	0.762402	1.02726e-129	7.81228e-126
ENSG00000168539	ENSG00000166206.12	0.762357	1.08644e-129	8.26237e-126
ENSG00000176884	ENSG00000105143.11	0.762355	1.08842e-129	8.27741e-126
ENSG00000168539	ENSG00000166501.11	0.76228	1.19462e-129	9.08505e-126
ENSG00000168539	ENSG00000091664.7	0.762174	1.35945e-129	1.03386e-125
ENSG00000176884	ENSG00000173898.10	0.761846	2.03495e-129	1.54758e-125
ENSG00000168539	ENSG00000170419.9	0.76179	2.17986e-129	1.65778e-125
ENSG00000176884	ENSG00000073670.12	0.761742	2.31256e-129	1.7587e-125
ENSG00000168539	ENSG00000173267.12	0.761651	2.58525e-129	1.96608e-125
ENSG00000168539	ENSG00000206052.9	0.761331	3.82223e-129	2.90681e-125
ENSG00000168539	ENSG00000084731.12	0.761245	4.24833e-129	3.23086e-125
ENSG00000176884	ENSG00000077264.13	0.761086	5.16238e-129	3.92599e-125
ENSG00000176884	ENSG00000237737.4	0.760843	6.94734e-129	5.28345e-125
ENSG00000176884	ENSG00000111249.12	0.76082	7.13841e-129	5.42876e-125
ENSG00000168539	ENSG00000237737.4	0.76073	7.96988e-129	6.0611e-125
ENSG00000176884	ENSG00000160396.8	0.760374	1.23092e-128	9.36116e-125
ENSG00000176884	ENSG00000150672.15	0.760146	1.62458e-128	1.23549e-124
ENSG00000176884	ENSG00000166763.7	0.759827	2.39371e-128	1.82042e-124
ENSG00000176884	ENSG00000176840.10	0.759672	2.88898e-128	2.19707e-124
ENSG00000176884	ENSG00000178394.4	0.759485	3.62478e-128	2.75664e-124
ENSG00000176884	ENSG00000130368.5	0.759479	3.65196e-128	2.77732e-124
ENSG00000176884	ENSG00000164082.13	0.75941	3.9689e-128	3.01835e-124
ENSG00000168539	ENSG00000129682.12	0.759195	5.15289e-128	3.91877e-124
ENSG00000176884	ENSG00000131242.14	0.758948	6.94394e-128	5.28086e-124
ENSG00000168539	ENSG00000186288.5	0.758854	7.77883e-128	5.9158e-124
ENSG00000176884	ENSG00000007264.12	0.758797	8.3326e-128	6.33695e-124
ENSG00000176884	ENSG00000067840.11	0.758715	9.20672e-128	7.00171e-124
ENSG00000168539	ENSG00000109158.9	0.758688	9.51136e-128	7.23339e-124
ENSG00000168539	ENSG00000170786.11	0.758672	9.69313e-128	7.37163e-124
ENSG00000168539	ENSG00000171132.12	0.758619	1.034e-127	7.8636e-124
ENSG00000176884	ENSG00000198216.9	0.758612	1.04187e-127	7.9234e-124
ENSG00000168539	ENSG00000101349.15	0.758463	1.24761e-127	9.4881e-124
ENSG00000176884	ENSG00000159248.4	0.758313	1.49558e-127	1.13739e-123
ENSG00000168539	ENSG00000168952.14	0.758222	1.66859e-127	1.26896e-123
ENSG00000176884	ENSG00000261496.1	0.75822	1.6729e-127	1.27224e-123
ENSG00000168539	ENSG00000132821.10	0.758134	1.85478e-127	1.41056e-123
ENSG00000168539	ENSG00000130822.14	0.75785	2.6118e-127	1.98628e-123
ENSG00000168539	ENSG00000060709.12	0.757734	3.00271e-127	2.28356e-123
ENSG00000176884	ENSG00000260903.2	0.757652	3.31321e-127	2.5197e-123
ENSG00000133019	ENSG00000054803.3	0.757648	3.32845e-127	2.53129e-123
ENSG00000168539	ENSG00000157087.15	0.757296	5.07976e-127	3.86315e-123
ENSG00000176884	ENSG00000144834.11	0.757164	5.95504e-127	4.52881e-123
ENSG00000168539	ENSG00000111249.12	0.757157	6.00702e-127	4.56834e-123
ENSG00000168539	ENSG00000159248.4	0.757115	6.31522e-127	4.80272e-123
ENSG00000168539	ENSG00000179841.8	0.757041	6.89696e-127	5.24514e-123
ENSG00000176884	ENSG00000259964.5	0.756891	8.25767e-127	6.27996e-123
ENSG00000176884	ENSG00000174521.7	0.756866	8.5074e-127	6.46988e-123
ENSG00000168539	ENSG00000147465.10	0.756568	1.21576e-126	9.24588e-123
ENSG00000168539	ENSG00000166763.7	0.756532	1.2691e-126	9.65148e-123
ENSG00000168539	ENSG00000144550.11	0.756531	1.27004e-126	9.65864e-123
ENSG00000176884	ENSG00000125851.8	0.756434	1.42601e-126	1.08448e-122
ENSG00000176884	ENSG00000120903.9	0.756292	1.69003e-126	1.28527e-122
ENSG00000176884	ENSG00000091664.7	0.756287	1.69969e-126	1.29262e-122
ENSG00000168539	ENSG00000135472.7	0.755985	2.43807e-126	1.85416e-122
ENSG00000176884	ENSG00000158806.12	0.755965	2.49588e-126	1.89812e-122
ENSG00000176884	ENSG00000176749.7	0.755842	2.88965e-126	2.19758e-122
ENSG00000176884	ENSG00000145526.10	0.75571	3.38192e-126	2.57195e-122
ENSG00000176884	ENSG00000144550.11	0.755681	3.50063e-126	2.66223e-122
ENSG00000168539	ENSG00000162989.4	0.755666	3.56466e-126	2.71093e-122
ENSG00000176884	ENSG00000196876.12	0.755595	3.87687e-126	2.94836e-122
ENSG00000176884	ENSG00000147465.10	0.755511	4.2857e-126	3.25927e-122
ENSG00000168539	ENSG00000111344.10	0.755493	4.3814e-126	3.33206e-122
ENSG00000176884	ENSG00000170786.11	0.755253	5.82318e-126	4.42853e-122
ENSG00000176884	ENSG00000186377.7	0.755068	7.25896e-126	5.52044e-122
ENSG00000176884	ENSG00000181072.10	0.75505	7.41753e-126	5.64103e-122
ENSG00000176884	ENSG00000198910.11	0.755022	7.66701e-126	5.83076e-122
ENSG00000168539	ENSG00000261496.1	0.755015	7.73087e-126	5.87932e-122
ENSG00000168539	ENSG00000107864.13	0.754942	8.43143e-126	6.41211e-122
ENSG00000176884	ENSG00000135472.7	0.754907	8.78315e-126	6.67958e-122
ENSG00000168539	ENSG00000198934.4	0.754868	9.2042e-126	6.99979e-122
ENSG00000168539	ENSG00000236333.3	0.754661	1.17636e-125	8.94623e-122
ENSG00000168539	ENSG00000069712.10	0.754572	1.30688e-125	9.9388e-122
ENSG00000176884	ENSG00000156564.8	0.75455	1.34026e-125	1.01926e-121
ENSG00000176884	ENSG00000206052.9	0.75424	1.93455e-125	1.47122e-121
ENSG00000168539	ENSG00000118733.15	0.754165	2.11489e-125	1.60838e-121
ENSG00000176884	ENSG00000186462.8	0.753983	2.62043e-125	1.99284e-121
ENSG00000168539	ENSG00000272163.1	0.753939	2.76288e-125	2.10117e-121
ENSG00000168539	ENSG00000186862.16	0.753928	2.79746e-125	2.12747e-121
ENSG00000176884	ENSG00000149654.8	0.75381	3.21537e-125	2.44529e-121
ENSG00000168539	ENSG00000118194.17	0.753747	3.46541e-125	2.63544e-121
ENSG00000176884	ENSG00000011347.8	0.753114	7.29725e-125	5.54956e-121
ENSG00000133019	ENSG00000133816.12	0.753099	7.42459e-125	5.6464e-121
ENSG00000168539	ENSG00000162728.4	0.752984	8.49952e-125	6.46388e-121
ENSG00000176884	ENSG00000152034.9	0.752804	1.05097e-124	7.99263e-121
ENSG00000168539	ENSG00000163995.17	0.752752	1.1165e-124	8.49099e-121
ENSG00000176884	ENSG00000069712.10	0.752742	1.13007e-124	8.59418e-121
ENSG00000168539	ENSG00000154146.11	0.752637	1.27774e-124	9.71724e-121
ENSG00000168539	ENSG00000153233.11	0.752516	1.47286e-124	1.12011e-120
ENSG00000168539	ENSG00000112290.11	0.752505	1.49138e-124	1.13419e-120
ENSG00000168539	ENSG00000144583.4	0.752414	1.65911e-124	1.26175e-120
ENSG00000176884	ENSG00000040608.12	0.752047	2.54997e-124	1.93925e-120
ENSG00000168539	ENSG00000067840.11	0.751974	2.77699e-124	2.1119e-120
ENSG00000176884	ENSG00000170419.9	0.751892	3.05738e-124	2.32514e-120
ENSG00000168539	ENSG00000221890.2	0.751146	7.30702e-124	5.55699e-120
ENSG00000168539	ENSG00000189410.10	0.750951	9.16416e-124	6.96935e-120
ENSG00000176884	ENSG00000013293.5	0.750894	9.79032e-124	7.44554e-120
ENSG00000176884	ENSG00000130822.14	0.750853	1.02772e-123	7.81578e-120
ENSG00000168539	ENSG00000011347.8	0.750844	1.03747e-123	7.88997e-120
ENSG00000176884	ENSG00000100285.9	0.750747	1.16179e-123	8.83538e-120
ENSG00000168539	ENSG00000078053.15	0.750558	1.4473e-123	1.10067e-119
ENSG00000176884	ENSG00000129682.12	0.750322	1.90302e-123	1.44725e-119
ENSG00000176884	ENSG00000169035.10	0.750308	1.9347e-123	1.47134e-119
ENSG00000176884	ENSG00000153233.11	0.750255	2.05827e-123	1.56532e-119
ENSG00000176884	ENSG00000105376.4	0.750107	2.44365e-123	1.85839e-119
ENSG00000176884	ENSG00000156097.11	0.749979	2.83365e-123	2.15499e-119
ENSG00000168539	ENSG00000254377.4	0.74991	3.06895e-123	2.33394e-119
ENSG00000168539	ENSG00000105613.8	0.749657	4.11357e-123	3.12837e-119
ENSG00000168539	ENSG00000165152.7	0.749637	4.20908e-123	3.20101e-119
ENSG00000133019	ENSG00000184368.14	0.74963	4.24094e-123	3.22524e-119
ENSG00000168539	ENSG00000033122.17	0.749117	7.67539e-123	5.83713e-119
ENSG00000133019	ENSG00000135324.5	0.748936	9.45875e-123	7.19338e-119
ENSG00000168539	ENSG00000188191.13	0.748846	1.04844e-122	7.97336e-119
ENSG00000168539	ENSG00000169676.5	0.74878	1.13159e-122	8.60576e-119
ENSG00000168539	ENSG00000226717.2	0.748762	1.15543e-122	8.78706e-119
ENSG00000168539	ENSG00000277586.1	0.748456	1.64216e-122	1.24886e-118
ENSG00000176884	ENSG00000186862.16	0.74814	2.36236e-122	1.79657e-118
ENSG00000176884	ENSG00000118194.17	0.748033	2.6709e-122	2.03122e-118
ENSG00000176884	ENSG00000104435.12	0.747798	3.49946e-122	2.66134e-118
ENSG00000168539	ENSG00000144619.13	0.74755	4.64674e-122	3.53385e-118
ENSG00000176884	ENSG00000171435.12	0.747383	5.62327e-122	4.27649e-118
ENSG00000168539	ENSG00000144460.11	0.747315	6.07807e-122	4.62237e-118
ENSG00000176884	ENSG00000165985.9	0.747273	6.3828e-122	4.85412e-118
ENSG00000168539	ENSG00000123612.14	0.747199	6.94649e-122	5.28281e-118
ENSG00000168539	ENSG00000184702.16	0.747137	7.45478e-122	5.66936e-118
ENSG00000176884	ENSG00000118733.15	0.747029	8.43438e-122	6.41434e-118
ENSG00000168539	ENSG00000007264.12	0.746951	9.21405e-122	7.00728e-118
ENSG00000168539	ENSG00000184368.14	0.746681	1.25501e-121	9.54439e-118
ENSG00000168539	ENSG00000183186.6	0.746625	1.33684e-121	1.01667e-117
ENSG00000168539	ENSG00000145526.10	0.746572	1.42084e-121	1.08055e-117
ENSG00000168539	ENSG00000169035.10	0.746559	1.4422e-121	1.09679e-117
ENSG00000168539	ENSG00000174672.14	0.746413	1.70167e-121	1.29412e-117
ENSG00000168539	ENSG00000177570.12	0.746404	1.71945e-121	1.30764e-117
ENSG00000168539	ENSG00000106648.12	0.746362	1.80403e-121	1.37196e-117
ENSG00000168539	ENSG00000259823.4	0.746229	2.10031e-121	1.59729e-117
ENSG00000176884	ENSG00000033122.17	0.746175	2.23215e-121	1.69755e-117
ENSG00000168539	ENSG00000279042.1	0.746088	2.46585e-121	1.87528e-117
ENSG00000176884	ENSG00000154027.17	0.745974	2.80613e-121	2.13406e-117
ENSG00000168539	ENSG00000204588.5	0.745828	3.31199e-121	2.51877e-117
ENSG00000176884	ENSG00000201136.1	0.745582	4.37879e-121	3.33007e-117
ENSG00000176884	ENSG00000139970.15	0.745535	4.61841e-121	3.5123e-117
ENSG00000168539	ENSG00000006432.14	0.745385	5.47487e-121	4.16364e-117
ENSG00000168539	ENSG00000054356.12	0.7453	6.0299e-121	4.58574e-117
ENSG00000168539	ENSG00000156097.11	0.745177	6.93326e-121	5.27275e-117
ENSG00000168539	ENSG00000120049.17	0.744823	1.03421e-120	7.86519e-117
ENSG00000168539	ENSG00000021645.16	0.744769	1.09928e-120	8.36002e-117
ENSG00000176884	ENSG00000205037.2	0.744419	1.63242e-120	1.24146e-116
ENSG00000176884	ENSG00000234688.1	0.744079	2.3938e-120	1.82048e-116
ENSG00000168539	ENSG00000178773.13	0.74388	2.99651e-120	2.27885e-116
ENSG00000176884	ENSG00000005379.14	0.74378	3.35387e-120	2.55062e-116
ENSG00000176884	ENSG00000279042.1	0.743173	6.63392e-120	5.04509e-116
ENSG00000168539	ENSG00000135423.11	0.743056	7.56594e-120	5.7539e-116
ENSG00000176884	ENSG00000235711.4	0.742983	8.20956e-120	6.24337e-116
ENSG00000168539	ENSG00000105143.11	0.742707	1.11865e-119	8.50737e-116
ENSG00000176884	ENSG00000274400.1	0.7423	1.76348e-119	1.34113e-115
ENSG00000176884	ENSG00000132821.10	0.742276	1.81086e-119	1.37716e-115
ENSG00000176884	ENSG00000053524.10	0.742153	2.07713e-119	1.57966e-115
ENSG00000133019	ENSG00000196872.9	0.742118	2.15982e-119	1.64254e-115
ENSG00000168539	ENSG00000106089.10	0.741914	2.71336e-119	2.06351e-115
ENSG00000176884	ENSG00000165868.11	0.741786	3.12956e-119	2.38003e-115
ENSG00000168539	ENSG00000201136.1	0.741785	3.13078e-119	2.38096e-115
ENSG00000168539	ENSG00000115194.9	0.741751	3.25339e-119	2.4742e-115
ENSG00000176884	ENSG00000169676.5	0.741722	3.36076e-119	2.55586e-115
ENSG00000168539	ENSG00000158560.13	0.741502	4.28986e-119	3.26244e-115
ENSG00000176884	ENSG00000198934.4	0.741431	4.64232e-119	3.53048e-115
ENSG00000168539	ENSG00000173175.13	0.740878	8.58464e-119	6.52862e-115
ENSG00000168539	ENSG00000146267.11	0.740806	9.29785e-119	7.07101e-115
ENSG00000133019	ENSG00000169427.5	0.740696	1.05126e-118	7.99483e-115
ENSG00000176884	ENSG00000154146.11	0.740577	1.19934e-118	9.12095e-115
ENSG00000176884	ENSG00000108352.10	0.74046	1.36493e-118	1.03803e-114
ENSG00000168539	ENSG00000180875.4	0.740405	1.45049e-118	1.1031e-114
ENSG00000168539	ENSG00000221857.6	0.740204	1.8121e-118	1.3781e-114
ENSG00000176884	ENSG00000177984.6	0.740146	1.93286e-118	1.46994e-114
ENSG00000168539	ENSG00000274400.1	0.740009	2.24969e-118	1.71089e-114
ENSG00000133019	ENSG00000175352.9	0.739979	2.32333e-118	1.76689e-114
ENSG00000176884	ENSG00000254377.4	0.739886	2.57684e-118	1.95969e-114
ENSG00000168539	ENSG00000181072.10	0.73987	2.6208e-118	1.99312e-114
ENSG00000168539	ENSG00000179148.8	0.739819	2.77246e-118	2.10846e-114
ENSG00000168539	ENSG00000154027.17	0.739636	3.39639e-118	2.58296e-114
ENSG00000168539	ENSG00000177984.6	0.739527	3.82791e-118	2.91112e-114
ENSG00000168539	ENSG00000100285.9	0.739398	4.41661e-118	3.35883e-114
ENSG00000168539	ENSG00000165985.9	0.739164	5.71353e-118	4.34514e-114
ENSG00000176884	ENSG00000103316.9	0.738919	7.47679e-118	5.6861e-114
ENSG00000168539	ENSG00000178394.4	0.73868	9.72951e-118	7.39929e-114
ENSG00000168539	ENSG00000243902.5	0.738475	1.21901e-117	9.27055e-114
ENSG00000168539	ENSG00000186472.18	0.73839	1.33766e-117	1.01729e-113
ENSG00000168539	ENSG00000108352.10	0.738184	1.67686e-117	1.27525e-113
ENSG00000168539	ENSG00000139973.14	0.738027	1.99096e-117	1.51413e-113
ENSG00000168539	ENSG00000172350.8	0.738017	2.01275e-117	1.5307e-113
ENSG00000168539	ENSG00000203772.7	0.737909	2.26554e-117	1.72294e-113
ENSG00000168539	ENSG00000280105.1	0.737478	3.63005e-117	2.76066e-113
ENSG00000176884	ENSG00000226717.2	0.737476	3.6381e-117	2.76677e-113
ENSG00000176884	ENSG00000157087.15	0.737433	3.81421e-117	2.90071e-113
ENSG00000168539	ENSG00000269945.1	0.737373	4.07445e-117	3.09862e-113
ENSG00000176884	ENSG00000106648.12	0.737288	4.46826e-117	3.39811e-113
ENSG00000168539	ENSG00000196277.14	0.737005	6.08706e-117	4.62921e-113
ENSG00000176884	ENSG00000157445.13	0.736954	6.43388e-117	4.89297e-113
ENSG00000176884	ENSG00000119125.15	0.736682	8.65242e-117	6.58017e-113
ENSG00000168539	ENSG00000235711.4	0.736626	9.19616e-117	6.99368e-113
ENSG00000168539	ENSG00000070182.16	0.736543	1.00637e-116	7.65346e-113
ENSG00000168539	ENSG00000076826.8	0.736473	1.08574e-116	8.25708e-113
ENSG00000168539	ENSG00000189181.4	0.736449	1.1148e-116	8.47802e-113
ENSG00000176884	ENSG00000189410.10	0.736419	1.15178e-116	8.75931e-113
ENSG00000168539	ENSG00000128683.12	0.736298	1.31372e-116	9.9908e-113
ENSG00000176884	ENSG00000204588.5	0.736223	1.42522e-116	1.08388e-112
ENSG00000176884	ENSG00000269945.1	0.736179	1.49583e-116	1.13758e-112
ENSG00000176884	ENSG00000168748.12	0.73611	1.61063e-116	1.22488e-112
ENSG00000176884	ENSG00000084731.12	0.735996	1.82274e-116	1.38619e-112
ENSG00000176884	ENSG00000172995.15	0.735981	1.85415e-116	1.41008e-112
ENSG00000168539	ENSG00000273301.1	0.735948	1.92112e-116	1.46101e-112
ENSG00000168539	ENSG00000205037.2	0.735602	2.79504e-116	2.12563e-112
ENSG00000176884	ENSG00000144583.4	0.735493	3.14515e-116	2.39189e-112
ENSG00000168539	ENSG00000005379.14	0.735166	4.48205e-116	3.4086e-112
ENSG00000168539	ENSG00000104435.12	0.735125	4.68541e-116	3.56326e-112
ENSG00000168539	ENSG00000182255.6	0.734959	5.60274e-116	4.26088e-112
ENSG00000168539	ENSG00000260903.2	0.734773	6.85114e-116	5.21029e-112
ENSG00000176884	ENSG00000221890.2	0.734758	6.964e-116	5.29612e-112
ENSG00000176884	ENSG00000162728.4	0.73466	7.74252e-116	5.88819e-112
ENSG00000168539	ENSG00000141404.14	0.734583	8.41061e-116	6.39627e-112
ENSG00000168539	ENSG00000091428.16	0.734532	8.88445e-116	6.75662e-112
ENSG00000168539	ENSG00000251621.1	0.734365	1.0634e-115	8.08712e-112
ENSG00000176884	ENSG00000171132.12	0.734329	1.10648e-115	8.4148e-112
ENSG00000176884	ENSG00000120049.17	0.734323	1.11316e-115	8.46557e-112
ENSG00000168539	ENSG00000176788.8	0.734088	1.43275e-115	1.0896e-111
ENSG00000168539	ENSG00000103316.9	0.733986	1.5995e-115	1.21642e-111
ENSG00000168539	ENSG00000136883.11	0.733928	1.70306e-115	1.29518e-111
ENSG00000176884	ENSG00000147246.8	0.733918	1.72088e-115	1.30873e-111
ENSG00000168539	ENSG00000134343.11	0.733877	1.79936e-115	1.36841e-111
ENSG00000176884	ENSG00000253230.5	0.733711	2.15009e-115	1.63514e-111
ENSG00000133019	ENSG00000117152.12	0.733658	2.27471e-115	1.72992e-111
ENSG00000168539	ENSG00000179774.8	0.733431	2.90273e-115	2.20753e-111
ENSG00000168539	ENSG00000142408.2	0.733367	3.10891e-115	2.36432e-111
ENSG00000176884	ENSG00000171246.5	0.733343	3.19198e-115	2.4275e-111
ENSG00000176884	ENSG00000163995.17	0.733064	4.30108e-115	3.27097e-111
ENSG00000168539	ENSG00000152969.15	0.732659	6.63454e-115	5.04557e-111
ENSG00000168539	ENSG00000168748.12	0.732601	7.05968e-115	5.36889e-111
ENSG00000176884	ENSG00000152969.15	0.73248	8.03533e-115	6.11087e-111
ENSG00000176884	ENSG00000135423.11	0.732405	8.70867e-115	6.62294e-111
ENSG00000168539	ENSG00000160963.12	0.732281	9.94156e-115	7.56055e-111
ENSG00000168539	ENSG00000149305.5	0.732123	1.17652e-114	8.94742e-111
ENSG00000176884	ENSG00000165125.16	0.731878	1.528e-114	1.16205e-110
ENSG00000168539	ENSG00000132026.12	0.731466	2.36682e-114	1.79997e-110
ENSG00000176884	ENSG00000091428.16	0.731451	2.40703e-114	1.83055e-110
ENSG00000168539	ENSG00000172995.15	0.731163	3.26811e-114	2.4854e-110
ENSG00000168539	ENSG00000167889.11	0.731142	3.34166e-114	2.54133e-110
ENSG00000176884	ENSG00000203772.7	0.731001	3.88097e-114	2.95147e-110
ENSG00000176884	ENSG00000100884.8	0.730933	4.17067e-114	3.17179e-110
ENSG00000176884	ENSG00000229797.1	0.730903	4.30493e-114	3.2739e-110
ENSG00000168539	ENSG00000139970.15	0.730851	4.55085e-114	3.46092e-110
ENSG00000168539	ENSG00000183715.12	0.730783	4.88752e-114	3.71696e-110
ENSG00000133019	ENSG00000130032.14	0.730553	6.23963e-114	4.74524e-110
ENSG00000176884	ENSG00000144619.13	0.73048	6.74208e-114	5.12735e-110
ENSG00000176884	ENSG00000141404.14	0.730378	7.50483e-114	5.70742e-110
ENSG00000176884	ENSG00000136883.11	0.730363	7.63037e-114	5.8029e-110
ENSG00000176884	ENSG00000177570.12	0.730244	8.65254e-114	6.58026e-110
ENSG00000168539	ENSG00000183662.9	0.729863	1.29328e-113	9.83542e-110
ENSG00000176884	ENSG00000204681.9	0.729504	1.88894e-113	1.43654e-109
ENSG00000168539	ENSG00000186310.9	0.729491	1.9155e-113	1.45674e-109
ENSG00000168539	ENSG00000167178.14	0.729386	2.13942e-113	1.62703e-109
ENSG00000176884	ENSG00000174672.14	0.729355	2.21103e-113	1.68149e-109
ENSG00000168539	ENSG00000216863.8	0.729127	2.81177e-113	2.13835e-109
ENSG00000168539	ENSG00000157445.13	0.728991	3.24365e-113	2.4668e-109
ENSG00000168539	ENSG00000011677.11	0.72895	3.38631e-113	2.57529e-109
ENSG00000176884	ENSG00000198785.4	0.728921	3.4894e-113	2.65369e-109
ENSG00000168539	ENSG00000204681.9	0.728744	4.20156e-113	3.19528e-109
ENSG00000176884	ENSG00000165379.12	0.728713	4.34479e-113	3.30421e-109
ENSG00000168539	ENSG00000171246.5	0.728639	4.69247e-113	3.56862e-109
ENSG00000176884	ENSG00000167371.15	0.728601	4.88445e-113	3.71462e-109
ENSG00000168539	ENSG00000175772.10	0.728499	5.43585e-113	4.13396e-109
ENSG00000176884	ENSG00000231133.5	0.728468	5.61383e-113	4.26932e-109
ENSG00000176884	ENSG00000184368.14	0.728458	5.67262e-113	4.31403e-109
ENSG00000168539	ENSG00000253230.5	0.728371	6.21806e-113	4.72883e-109
ENSG00000176884	ENSG00000261292.2	0.727983	9.34053e-113	7.10347e-109
ENSG00000168539	ENSG00000182256.11	0.727892	1.02662e-112	7.80742e-109
ENSG00000133019	ENSG00000128245.13	0.727643	1.3326e-112	1.01344e-108
ENSG00000176884	ENSG00000186310.9	0.72748	1.57987e-112	1.20149e-108
ENSG00000176884	ENSG00000182256.11	0.727293	1.92121e-112	1.46108e-108
ENSG00000133019	ENSG00000185742.6	0.727268	1.97007e-112	1.49824e-108
ENSG00000168539	ENSG00000234688.1	0.727243	2.02397e-112	1.53923e-108
ENSG00000133019	ENSG00000149269.8	0.727163	2.19849e-112	1.67195e-108
ENSG00000176884	ENSG00000060709.12	0.726943	2.76732e-112	2.10455e-108
ENSG00000133019	ENSG00000106976.17	0.726907	2.87131e-112	2.18363e-108
ENSG00000168539	ENSG00000053524.10	0.726903	2.88417e-112	2.19341e-108
ENSG00000176884	ENSG00000176788.8	0.726846	3.05964e-112	2.32686e-108
ENSG00000168539	ENSG00000144596.10	0.726826	3.12543e-112	2.37689e-108
ENSG00000176884	ENSG00000008118.8	0.726593	3.98133e-112	3.0278e-108
ENSG00000133019	ENSG00000154146.11	0.726578	4.04469e-112	3.07599e-108
ENSG00000176884	ENSG00000167178.14	0.726498	4.39465e-112	3.34213e-108
ENSG00000133019	ENSG00000180044.4	0.726416	4.78552e-112	3.63939e-108
ENSG00000133019	ENSG00000165985.9	0.726291	5.45197e-112	4.14622e-108
ENSG00000168539	ENSG00000168135.4	0.726071	6.85036e-112	5.2097e-108
ENSG00000176884	ENSG00000092051.15	0.725983	7.50561e-112	5.70802e-108
ENSG00000168539	ENSG00000167754.11	0.725847	8.6385e-112	6.56958e-108
ENSG00000168539	ENSG00000116675.14	0.725834	8.76157e-112	6.66318e-108
ENSG00000168539	ENSG00000106976.17	0.725781	9.25828e-112	7.04092e-108
ENSG00000168539	ENSG00000185105.4	0.725722	9.83352e-112	7.47839e-108
ENSG00000168539	ENSG00000165125.16	0.725646	1.06442e-111	8.09494e-108
ENSG00000176884	ENSG00000101349.15	0.725401	1.37237e-111	1.04369e-107
ENSG00000176884	ENSG00000164112.11	0.724857	2.40731e-111	1.83076e-107
ENSG00000176884	ENSG00000165152.7	0.724684	2.87812e-111	2.18881e-107
ENSG00000168539	ENSG00000162951.9	0.724617	3.08406e-111	2.34543e-107
ENSG00000168539	ENSG00000135127.10	0.724584	3.18992e-111	2.42594e-107
ENSG00000176884	ENSG00000185274.10	0.72456	3.27044e-111	2.48717e-107
ENSG00000176884	ENSG00000216863.8	0.724559	3.2734e-111	2.48942e-107
ENSG00000176884	ENSG00000105613.8	0.724441	3.6968e-111	2.81141e-107
ENSG00000176884	ENSG00000221857.6	0.724425	3.75677e-111	2.85703e-107
ENSG00000176884	ENSG00000243902.5	0.724335	4.12216e-111	3.1349e-107
ENSG00000176884	ENSG00000102924.10	0.723971	5.99787e-111	4.56138e-107
ENSG00000176884	ENSG00000259823.4	0.723686	8.03795e-111	6.11286e-107
ENSG00000176884	ENSG00000189181.4	0.723649	8.34725e-111	6.34808e-107
ENSG00000176884	ENSG00000278532.1	0.72339	1.08908e-110	8.28243e-107
ENSG00000168539	ENSG00000165553.4	0.723338	1.14915e-110	8.73932e-107
ENSG00000133019	ENSG00000174460.3	0.722999	1.62549e-110	1.23618e-106
ENSG00000176884	ENSG00000106089.10	0.722838	1.91698e-110	1.45787e-106
ENSG00000168539	ENSG00000235961.5	0.722717	2.16907e-110	1.64957e-106
ENSG00000176884	ENSG00000186472.18	0.722671	2.27393e-110	1.72932e-106
ENSG00000176884	ENSG00000183662.9	0.722576	2.50664e-110	1.9063e-106
ENSG00000176884	ENSG00000119698.10	0.722501	2.70488e-110	2.05706e-106
ENSG00000176884	ENSG00000277200.1	0.72247	2.7925e-110	2.1237e-106
ENSG00000176884	ENSG00000184845.3	0.722292	3.35003e-110	2.5477e-106
ENSG00000168539	ENSG00000164112.11	0.722268	3.43063e-110	2.60899e-106
ENSG00000168539	ENSG00000169282.16	0.722264	3.44669e-110	2.6212e-106
ENSG00000176884	ENSG00000140600.15	0.722197	3.68937e-110	2.80576e-106
ENSG00000168539	ENSG00000171303.6	0.722005	4.49006e-110	3.41469e-106
ENSG00000168539	ENSG00000228971.2	0.721983	4.59226e-110	3.49242e-106
ENSG00000176884	ENSG00000179148.8	0.721662	6.36611e-110	4.84142e-106
ENSG00000168539	ENSG00000268038.1	0.721525	7.31464e-110	5.56278e-106
ENSG00000133019	ENSG00000070159.12	0.721474	7.71063e-110	5.86393e-106
ENSG00000176884	ENSG00000054356.12	0.72142	8.13933e-110	6.18996e-106
ENSG00000176884	ENSG00000145335.14	0.721418	8.15569e-110	6.2024e-106
ENSG00000176884	ENSG00000157005.3	0.721398	8.3233e-110	6.32987e-106
ENSG00000168539	ENSG00000145335.14	0.721369	8.57853e-110	6.52397e-106
ENSG00000168539	ENSG00000236064.1	0.721277	9.41395e-110	7.15931e-106
ENSG00000176884	ENSG00000158748.3	0.721199	1.01932e-109	7.75191e-106
ENSG00000133019	ENSG00000164112.11	0.721166	1.05419e-109	8.01709e-106
ENSG00000168539	ENSG00000147246.8	0.721118	1.10674e-109	8.41678e-106
ENSG00000176884	ENSG00000108924.12	0.721076	1.15552e-109	8.78776e-106
ENSG00000168539	ENSG00000157005.3	0.721047	1.18999e-109	9.04991e-106
ENSG00000176884	ENSG00000203900.2	0.720955	1.30568e-109	9.92972e-106
ENSG00000168539	ENSG00000167654.16	0.720813	1.50785e-109	1.14672e-105
ENSG00000176884	ENSG00000021645.16	0.720524	2.02081e-109	1.53683e-105
ENSG00000168539	ENSG00000069424.13	0.720361	2.38319e-109	1.81242e-105
ENSG00000176884	ENSG00000121905.8	0.720359	2.38954e-109	1.81724e-105
ENSG00000176884	ENSG00000184702.16	0.720339	2.43706e-109	1.85339e-105
ENSG00000133019	ENSG00000135426.13	0.720083	3.15672e-109	2.40069e-105
ENSG00000168539	ENSG00000166603.4	0.719951	3.60991e-109	2.74533e-105
ENSG00000168539	ENSG00000203900.2	0.719933	3.67475e-109	2.79465e-105
ENSG00000168539	ENSG00000270111.1	0.719906	3.77866e-109	2.87367e-105
ENSG00000168539	ENSG00000101204.14	0.71984	4.03864e-109	3.07139e-105
ENSG00000168539	ENSG00000254921.1	0.719795	4.22326e-109	3.21179e-105
ENSG00000168539	ENSG00000100341.10	0.719712	4.59343e-109	3.4933e-105
ENSG00000168539	ENSG00000100167.18	0.719651	4.88745e-109	3.71691e-105
ENSG00000168539	ENSG00000186907.6	0.719541	5.46095e-109	4.15305e-105
ENSG00000168539	ENSG00000119125.15	0.719353	6.60106e-109	5.0201e-105
ENSG00000168539	ENSG00000008118.8	0.719311	6.88316e-109	5.23464e-105
ENSG00000168539	ENSG00000063180.7	0.719018	9.24136e-109	7.02806e-105
ENSG00000176884	ENSG00000185105.4	0.719017	9.25268e-109	7.03667e-105
ENSG00000176884	ENSG00000196090.11	0.71896	9.80179e-109	7.45426e-105
ENSG00000176884	ENSG00000179841.8	0.718939	1.00057e-108	7.6093e-105
ENSG00000176884	ENSG00000135127.10	0.718938	1.00153e-108	7.61665e-105
ENSG00000176884	ENSG00000228971.2	0.718711	1.25835e-108	9.56972e-105
ENSG00000176884	ENSG00000142408.2	0.718443	1.64722e-108	1.25271e-104
ENSG00000133019	ENSG00000106852.14	0.718359	1.79183e-108	1.36268e-104
ENSG00000168539	ENSG00000010438.15	0.718352	1.80502e-108	1.37272e-104
ENSG00000168539	ENSG00000261325.1	0.71817	2.16698e-108	1.64799e-104
ENSG00000133019	ENSG00000115194.9	0.71811	2.3007e-108	1.74969e-104
ENSG00000168539	ENSG00000277200.1	0.718013	2.53667e-108	1.92914e-104
ENSG00000168539	ENSG00000263571.1	0.717951	2.69896e-108	2.05256e-104
ENSG00000168539	ENSG00000121905.8	0.717404	4.66569e-108	3.54826e-104
ENSG00000176884	ENSG00000251621.1	0.717145	6.03781e-108	4.59176e-104
ENSG00000133019	ENSG00000165983.13	0.717128	6.14602e-108	4.67405e-104
ENSG00000176884	ENSG00000180616.7	0.71705	6.64284e-108	5.05188e-104
ENSG00000176884	ENSG00000182230.10	0.716951	7.32983e-108	5.57433e-104
ENSG00000168539	ENSG00000101445.8	0.716891	7.78507e-108	5.92054e-104
ENSG00000133019	ENSG00000141750.6	0.716781	8.68608e-108	6.60576e-104
ENSG00000168539	ENSG00000171435.12	0.716395	1.27512e-107	9.69727e-104
ENSG00000176884	ENSG00000178773.13	0.716342	1.34387e-107	1.02201e-103
ENSG00000168539	ENSG00000179477.8	0.716307	1.39134e-107	1.05811e-103
ENSG00000168539	ENSG00000278911.1	0.716286	1.42152e-107	1.08106e-103
ENSG00000176884	ENSG00000082556.9	0.716221	1.51581e-107	1.15278e-103
ENSG00000168539	ENSG00000205279.7	0.716214	1.52631e-107	1.16076e-103
ENSG00000168539	ENSG00000107130.8	0.716195	1.55636e-107	1.18361e-103
ENSG00000168539	ENSG00000231133.5	0.716102	1.70659e-107	1.29786e-103
ENSG00000168539	ENSG00000166793.9	0.715992	1.90387e-107	1.44789e-103
ENSG00000168539	ENSG00000237720.1	0.715914	2.05656e-107	1.56402e-103
ENSG00000168539	ENSG00000254187.1	0.71576	2.39591e-107	1.82209e-103
ENSG00000168539	ENSG00000249487.5	0.715737	2.45239e-107	1.86505e-103
ENSG00000168539	ENSG00000132671.5	0.715593	2.82839e-107	2.15099e-103
ENSG00000168539	ENSG00000187135.7	0.715443	3.28007e-107	2.49449e-103
ENSG00000168539	ENSG00000231536.1	0.715424	3.34354e-107	2.54277e-103
ENSG00000176884	ENSG00000058335.14	0.715189	4.22115e-107	3.21018e-103
ENSG00000133019	ENSG00000106089.10	0.715144	4.41214e-107	3.35543e-103
ENSG00000176884	ENSG00000268038.1	0.715082	4.68912e-107	3.56608e-103
ENSG00000168539	ENSG00000250584.2	0.71489	5.67177e-107	4.31338e-103
ENSG00000168539	ENSG00000167680.14	0.714829	6.02633e-107	4.58302e-103
ENSG00000176884	ENSG00000100341.10	0.71474	6.57863e-107	5.00305e-103
ENSG00000168539	ENSG00000187672.11	0.714668	7.06268e-107	5.37117e-103
ENSG00000176884	ENSG00000149305.5	0.714662	7.10268e-107	5.40159e-103
ENSG00000168539	ENSG00000088538.12	0.714627	7.35274e-107	5.59176e-103
ENSG00000176884	ENSG00000069424.13	0.714614	7.45054e-107	5.66614e-103
ENSG00000168539	ENSG00000130294.13	0.714556	7.89014e-107	6.00045e-103
ENSG00000168539	ENSG00000255087.2	0.714526	8.12889e-107	6.18202e-103
ENSG00000168539	ENSG00000229797.1	0.71447	8.58829e-107	6.5314e-103
ENSG00000168539	ENSG00000198785.4	0.714393	9.26315e-107	7.04462e-103
ENSG00000176884	ENSG00000169282.16	0.714326	9.90133e-107	7.52996e-103
ENSG00000133019	ENSG00000147041.10	0.714212	1.10705e-106	8.41915e-103
ENSG00000168539	ENSG00000112053.12	0.714184	1.13793e-106	8.65392e-103
ENSG00000133019	ENSG00000178965.12	0.71365	1.92619e-106	1.46487e-102
ENSG00000176884	ENSG00000269883.1	0.713567	2.08958e-106	1.58913e-102
ENSG00000176884	ENSG00000196277.14	0.713466	2.30731e-106	1.75471e-102
ENSG00000176884	ENSG00000076826.8	0.713438	2.37039e-106	1.80268e-102
ENSG00000168539	ENSG00000269883.1	0.713304	2.70596e-106	2.05788e-102
ENSG00000168539	ENSG00000196090.11	0.713275	2.78316e-106	2.11659e-102
ENSG00000176884	ENSG00000172260.12	0.713154	3.13335e-106	2.38291e-102
ENSG00000176884	ENSG00000126733.19	0.712685	4.96459e-106	3.77557e-102
ENSG00000168539	ENSG00000185933.6	0.712642	5.17604e-106	3.93637e-102
ENSG00000176884	ENSG00000166793.9	0.712504	5.92229e-106	4.5039e-102
ENSG00000176884	ENSG00000237720.1	0.712494	5.9806e-106	4.54824e-102
ENSG00000176884	ENSG00000053108.15	0.712318	7.1027e-106	5.40161e-102
ENSG00000176884	ENSG00000167754.11	0.71223	7.74071e-106	5.88681e-102
ENSG00000176884	ENSG00000171368.11	0.712189	8.05754e-106	6.12776e-102
ENSG00000176884	ENSG00000132671.5	0.71215	8.37708e-106	6.37077e-102
ENSG00000176884	ENSG00000180875.4	0.711928	1.04031e-105	7.91156e-102
ENSG00000176884	ENSG00000280105.1	0.711865	1.10559e-105	8.40804e-102
ENSG00000176884	ENSG00000130294.13	0.711843	1.13036e-105	8.5964e-102
ENSG00000168539	ENSG00000126733.19	0.711742	1.24729e-105	9.48564e-102
ENSG00000133019	ENSG00000136153.18	0.711704	1.29385e-105	9.83973e-102
ENSG00000168539	ENSG00000267466.1	0.711561	1.48786e-105	1.13151e-101
ENSG00000176884	ENSG00000063180.7	0.711544	1.51277e-105	1.15046e-101
ENSG00000176884	ENSG00000115194.9	0.711185	2.1453e-105	1.6315e-101
ENSG00000133019	ENSG00000160396.8	0.711138	2.245e-105	1.70732e-101
ENSG00000176884	ENSG00000264515.4	0.711134	2.25468e-105	1.71469e-101
ENSG00000176884	ENSG00000274718.1	0.711087	2.35879e-105	1.79386e-101
ENSG00000176884	ENSG00000116675.14	0.710966	2.65496e-105	2.0191e-101
ENSG00000176884	ENSG00000070182.16	0.710297	5.07851e-105	3.86221e-101
ENSG00000176884	ENSG00000150054.17	0.710041	6.50616e-105	4.94794e-101
ENSG00000168539	ENSG00000264515.4	0.71	6.77161e-105	5.14981e-101
ENSG00000176884	ENSG00000139874.5	0.709998	6.78403e-105	5.15926e-101
ENSG00000168539	ENSG00000249896.1	0.709958	7.05186e-105	5.36294e-101
ENSG00000168539	ENSG00000101292.7	0.709887	7.55604e-105	5.74637e-101
ENSG00000176884	ENSG00000175772.10	0.709615	9.83178e-105	7.47707e-101
ENSG00000176884	ENSG00000248285.1	0.709582	1.01497e-104	7.71888e-101
ENSG00000176884	ENSG00000168135.4	0.709546	1.05065e-104	7.99021e-101
ENSG00000168539	ENSG00000232503.1	0.709544	1.05278e-104	8.00642e-101
ENSG00000176884	ENSG00000169900.6	0.709517	1.08062e-104	8.21813e-101
ENSG00000168539	ENSG00000274718.1	0.709482	1.11728e-104	8.4969e-101
ENSG00000168539	ENSG00000169258.6	0.709462	1.13967e-104	8.66718e-101
ENSG00000176884	ENSG00000128683.12	0.709396	1.21476e-104	9.23826e-101
ENSG00000176884	ENSG00000155974.10	0.709135	1.56162e-104	1.18761e-100
ENSG00000168539	ENSG00000004660.13	0.709134	1.56418e-104	1.18956e-100
ENSG00000176884	ENSG00000103056.10	0.709029	1.73065e-104	1.31616e-100
ENSG00000168539	ENSG00000272636.3	0.709021	1.74396e-104	1.32628e-100
ENSG00000168539	ENSG00000188573.7	0.708938	1.88941e-104	1.4369e-100
ENSG00000176884	ENSG00000272636.3	0.708795	2.16742e-104	1.64832e-100
ENSG00000133019	ENSG00000233487.6	0.708717	2.3369e-104	1.77721e-100
ENSG00000176884	ENSG00000173175.13	0.708572	2.68713e-104	2.04356e-100
ENSG00000176884	ENSG00000166603.4	0.708533	2.78994e-104	2.12175e-100
ENSG00000168539	ENSG00000007402.10	0.708524	2.81309e-104	2.13935e-100
ENSG00000176884	ENSG00000198944.5	0.708494	2.8943e-104	2.20112e-100
ENSG00000176884	ENSG00000006432.14	0.708354	3.3113e-104	2.51825e-100
ENSG00000168539	ENSG00000100884.8	0.708161	3.98923e-104	3.03381e-100
ENSG00000176884	ENSG00000107130.8	0.708108	4.19466e-104	3.19004e-100
ENSG00000168539	ENSG00000107295.9	0.708092	4.26236e-104	3.24153e-100
ENSG00000176884	ENSG00000100167.18	0.708003	4.63962e-104	3.52843e-100
ENSG00000176884	ENSG00000088538.12	0.707954	4.86239e-104	3.69785e-100
ENSG00000168539	ENSG00000184845.3	0.707491	7.58071e-104	5.76513e-100
ENSG00000133019	ENSG00000186212.3	0.707436	7.9923e-104	6.07814e-100
ENSG00000176884	ENSG00000078725.11	0.707242	9.62233e-104	7.31778e-100
ENSG00000176884	ENSG00000249436.1	0.707162	1.03857e-103	7.89833e-100
ENSG00000176884	ENSG00000158560.13	0.707117	1.08413e-103	8.2448e-100
ENSG00000176884	ENSG00000232503.1	0.707092	1.1107e-103	8.44686e-100
ENSG00000133019	ENSG00000140403.11	0.707089	1.11343e-103	8.46764e-100
ENSG00000176884	ENSG00000165973.16	0.707075	1.12876e-103	8.58424e-100
ENSG00000168539	ENSG00000261963.2	0.706936	1.28909e-103	9.80351e-100
ENSG00000168539	ENSG00000182230.10	0.706906	1.32639e-103	1.00872e-99
ENSG00000176884	ENSG00000160963.12	0.706778	1.49863e-103	1.13971e-99
ENSG00000176884	ENSG00000132026.12	0.706074	2.93332e-103	2.23079e-99
ENSG00000168539	ENSG00000103056.10	0.706001	3.14264e-103	2.38998e-99
ENSG00000168539	ENSG00000278532.1	0.705918	3.40078e-103	2.5863e-99
ENSG00000168539	ENSG00000233123.1	0.705879	3.52907e-103	2.68386e-99
ENSG00000168539	ENSG00000119698.10	0.705779	3.88227e-103	2.95247e-99
ENSG00000168539	ENSG00000150361.10	0.705769	3.91951e-103	2.98079e-99
ENSG00000133019	ENSG00000156486.7	0.705706	4.16078e-103	3.16427e-99
ENSG00000168539	ENSG00000273540.1	0.70559	4.64723e-103	3.53422e-99
ENSG00000176884	ENSG00000167889.11	0.705294	6.15402e-103	4.68013e-99
ENSG00000168539	ENSG00000140600.15	0.70513	7.1893e-103	5.46746e-99
ENSG00000176884	ENSG00000187135.7	0.705105	7.36238e-103	5.59909e-99
ENSG00000176884	ENSG00000185933.6	0.704988	8.22818e-103	6.25753e-99
ENSG00000176884	ENSG00000073150.12	0.704915	8.8159e-103	6.70449e-99
ENSG00000176884	ENSG00000078053.15	0.704895	8.98402e-103	6.83234e-99
ENSG00000168539	ENSG00000176194.16	0.704693	1.08763e-102	8.27146e-99
ENSG00000176884	ENSG00000003987.12	0.704496	1.3099e-102	9.96177e-99
ENSG00000168539	ENSG00000162188.5	0.703874	2.35805e-102	1.79329e-98
ENSG00000168539	ENSG00000249436.1	0.703853	2.40442e-102	1.82856e-98
ENSG00000168539	ENSG00000221946.6	0.703846	2.4213e-102	1.8414e-98
ENSG00000168539	ENSG00000153266.11	0.703792	2.54705e-102	1.93703e-98
ENSG00000168539	ENSG00000265579.1	0.703768	2.60487e-102	1.98101e-98
ENSG00000168539	ENSG00000154162.12	0.703743	2.66678e-102	2.02809e-98
ENSG00000176884	ENSG00000100362.11	0.703711	2.74911e-102	2.0907e-98
ENSG00000133019	ENSG00000277586.1	0.703686	2.81396e-102	2.14001e-98
ENSG00000133019	ENSG00000140284.9	0.703684	2.82024e-102	2.14479e-98
ENSG00000133019	ENSG00000150995.16	0.703599	3.05625e-102	2.32428e-98
ENSG00000168539	ENSG00000101977.18	0.703295	4.06788e-102	3.09362e-98
ENSG00000176884	ENSG00000153266.11	0.702769	6.66548e-102	5.0691e-98
ENSG00000133019	ENSG00000091622.14	0.702743	6.83214e-102	5.19584e-98
ENSG00000168539	ENSG00000133878.7	0.702471	8.81995e-102	6.70757e-98
ENSG00000133019	ENSG00000204396.9	0.70235	9.87398e-102	7.50916e-98
ENSG00000168539	ENSG00000108924.12	0.702347	9.90952e-102	7.53619e-98
ENSG00000168539	ENSG00000150054.17	0.702328	1.00788e-101	7.66489e-98
ENSG00000176884	ENSG00000007402.10	0.702294	1.04108e-101	7.91738e-98
ENSG00000133019	ENSG00000138378.16	0.702234	1.10077e-101	8.37135e-98
ENSG00000168539	ENSG00000189275.3	0.702221	1.11458e-101	8.4764e-98
ENSG00000176884	ENSG00000187672.11	0.702168	1.17159e-101	8.90997e-98
ENSG00000176884	ENSG00000165553.4	0.702166	1.17352e-101	8.92464e-98
ENSG00000176884	ENSG00000171772.14	0.701892	1.51717e-101	1.15381e-97
ENSG00000176884	ENSG00000171303.6	0.701746	1.73874e-101	1.32231e-97
ENSG00000176884	ENSG00000101204.14	0.701745	1.73943e-101	1.32284e-97
ENSG00000176884	ENSG00000112053.12	0.701714	1.79108e-101	1.36212e-97
ENSG00000168539	ENSG00000168348.3	0.701689	1.83363e-101	1.39447e-97
ENSG00000168539	ENSG00000110427.13	0.701501	2.18559e-101	1.66214e-97
ENSG00000176884	ENSG00000176194.16	0.701417	2.36331e-101	1.7973e-97
ENSG00000176884	ENSG00000188011.5	0.701375	2.45835e-101	1.86957e-97
ENSG00000168539	ENSG00000178235.7	0.701309	2.61404e-101	1.98797e-97
ENSG00000168539	ENSG00000165379.12	0.701299	2.63964e-101	2.00745e-97
ENSG00000168539	ENSG00000139874.5	0.701275	2.69913e-101	2.05269e-97
ENSG00000133019	ENSG00000011347.8	0.701231	2.81207e-101	2.13858e-97
ENSG00000176884	ENSG00000205279.7	0.70113	3.08973e-101	2.34974e-97
ENSG00000133019	ENSG00000008118.8	0.701106	3.15871e-101	2.4022e-97
ENSG00000176884	ENSG00000179774.8	0.701008	3.46185e-101	2.63274e-97
ENSG00000133019	ENSG00000250584.2	0.700885	3.88153e-101	2.9519e-97
ENSG00000168539	ENSG00000180616.7	0.700844	4.03409e-101	3.06792e-97
ENSG00000168539	ENSG00000186212.3	0.700837	4.05946e-101	3.08722e-97
ENSG00000176884	ENSG00000107295.9	0.700822	4.11439e-101	3.129e-97
ENSG00000133019	ENSG00000121905.8	0.700822	4.11532e-101	3.1297e-97
ENSG00000176884	ENSG00000110427.13	0.700801	4.19548e-101	3.19067e-97
ENSG00000168539	ENSG00000111262.4	0.700797	4.21253e-101	3.20363e-97
ENSG00000176884	ENSG00000004660.13	0.700778	4.28692e-101	3.2602e-97
ENSG00000176884	ENSG00000204677.9	0.700646	4.85052e-101	3.68882e-97
ENSG00000133019	ENSG00000152034.9	0.700322	6.55572e-101	4.98562e-97
ENSG00000168539	ENSG00000105278.9	0.700213	7.24961e-101	5.51333e-97
ENSG00000168539	ENSG00000117016.8	0.700123	7.88215e-101	5.99437e-97
ENSG00000176884	ENSG00000263571.1	0.700072	8.26439e-101	6.28507e-97
ENSG00000168539	ENSG00000165973.16	0.700062	8.34576e-101	6.34695e-97
ENSG00000168539	ENSG00000122254.6	0.70003	8.59396e-101	6.5357e-97
ENSG00000168539	ENSG00000272479.1	0.699901	9.68617e-101	7.36633e-97
ENSG00000168539	ENSG00000082556.9	0.699898	9.71361e-101	7.3872e-97
ENSG00000133019	ENSG00000101638.12	0.699889	9.79259e-101	7.44726e-97
ENSG00000176884	ENSG00000261963.2	0.699701	1.16562e-100	8.86452e-97
ENSG00000133019	ENSG00000278969.1	0.699663	1.20786e-100	9.18577e-97
ENSG00000176884	ENSG00000106123.10	0.699613	1.26466e-100	9.61771e-97
ENSG00000168539	ENSG00000135750.13	0.699577	1.30788e-100	9.94646e-97
ENSG00000168539	ENSG00000102924.10	0.699544	1.34821e-100	1.02531e-96
ENSG00000176884	ENSG00000231824.3	0.699532	1.36409e-100	1.03739e-96
ENSG00000176884	ENSG00000139973.14	0.699068	2.09486e-100	1.59314e-96
ENSG00000176884	ENSG00000122254.6	0.698985	2.26258e-100	1.72069e-96
ENSG00000168539	ENSG00000184258.6	0.69892	2.40146e-100	1.82631e-96
ENSG00000176884	ENSG00000179542.14	0.698849	2.56539e-100	1.95098e-96
ENSG00000168539	ENSG00000205562.2	0.698828	2.61416e-100	1.98807e-96
ENSG00000176884	ENSG00000106976.17	0.698791	2.70534e-100	2.05741e-96
ENSG00000168539	ENSG00000134709.9	0.69877	2.75932e-100	2.09847e-96
ENSG00000176884	ENSG00000224116.5	0.698728	2.86733e-100	2.18061e-96
ENSG00000168539	ENSG00000233936.1	0.698627	3.14919e-100	2.39496e-96
ENSG00000168539	ENSG00000150394.12	0.698615	3.18384e-100	2.42131e-96
ENSG00000133019	ENSG00000205037.2	0.698471	3.63655e-100	2.7656e-96
ENSG00000176884	ENSG00000101292.7	0.698366	4.00345e-100	3.04463e-96
ENSG00000168539	ENSG00000020129.14	0.69836	4.02685e-100	3.06242e-96
ENSG00000176884	ENSG00000236064.1	0.698253	4.44426e-100	3.37986e-96
ENSG00000168539	ENSG00000171368.11	0.698233	4.52704e-100	3.44281e-96
ENSG00000176884	ENSG00000114812.11	0.697982	5.7024e-100	4.33668e-96
ENSG00000168539	ENSG00000155974.10	0.697856	6.40671e-100	4.8723e-96
ENSG00000168539	ENSG00000152495.9	0.697697	7.41389e-100	5.63826e-96
ENSG00000176884	ENSG00000101445.8	0.697403	9.70747e-100	7.38253e-96
ENSG00000168539	ENSG00000114812.11	0.697383	9.89016e-100	7.52147e-96
ENSG00000168539	ENSG00000162817.6	0.697219	1.14902e-99	8.73833e-96
ENSG00000176884	ENSG00000257151.1	0.697147	1.22746e-99	9.33484e-96
ENSG00000176884	ENSG00000139287.11	0.696762	1.74693e-99	1.32854e-95
ENSG00000133019	ENSG00000162188.5	0.696729	1.80056e-99	1.36933e-95
ENSG00000176884	ENSG00000139220.15	0.696543	2.13473e-99	1.62346e-95
ENSG00000133019	ENSG00000214043.6	0.696513	2.1953e-99	1.66952e-95
ENSG00000168539	ENSG00000168959.13	0.69649	2.24144e-99	1.70461e-95
ENSG00000168539	ENSG00000185274.10	0.696137	3.09563e-99	2.35423e-95
ENSG00000176884	ENSG00000169891.16	0.696049	3.35377e-99	2.55054e-95
ENSG00000168539	ENSG00000139287.11	0.695813	4.15916e-99	3.16304e-95
ENSG00000168539	ENSG00000113319.10	0.69561	5.00215e-99	3.80413e-95
ENSG00000176884	ENSG00000124406.15	0.695592	5.08881e-99	3.87004e-95
ENSG00000176884	ENSG00000250584.2	0.695516	5.45339e-99	4.1473e-95
ENSG00000168539	ENSG00000261037.1	0.695361	6.27538e-99	4.77243e-95
ENSG00000168539	ENSG00000167371.15	0.695201	7.26361e-99	5.52398e-95
ENSG00000133019	ENSG00000189410.10	0.695192	7.31937e-99	5.56638e-95
ENSG00000168539	ENSG00000124406.15	0.695037	8.43134e-99	6.41203e-95
ENSG00000176884	ENSG00000144290.15	0.694911	9.45481e-99	7.19038e-95
ENSG00000176884	ENSG00000255087.2	0.694848	1.00082e-98	7.61122e-95
ENSG00000176884	ENSG00000265579.1	0.694776	1.06903e-98	8.12994e-95
ENSG00000168539	ENSG00000145087.11	0.694561	1.29895e-98	9.87854e-95
ENSG00000133019	ENSG00000216863.8	0.694496	1.37761e-98	1.04767e-94
ENSG00000133019	ENSG00000175874.8	0.694451	1.43524e-98	1.0915e-94
ENSG00000176884	ENSG00000150361.10	0.694357	1.56336e-98	1.18893e-94
ENSG00000176884	ENSG00000278911.1	0.693913	2.33541e-98	1.77608e-94
ENSG00000168539	ENSG00000170214.3	0.693804	2.57876e-98	1.96114e-94
ENSG00000176884	ENSG00000250986.1	0.69364	2.99083e-98	2.27452e-94
ENSG00000176884	ENSG00000144596.10	0.693598	3.1071e-98	2.36295e-94
ENSG00000168539	ENSG00000091622.14	0.693509	3.36646e-98	2.56019e-94
ENSG00000168539	ENSG00000261292.2	0.693405	3.69668e-98	2.81133e-94
ENSG00000176884	ENSG00000011677.11	0.69338	3.78287e-98	2.87687e-94
ENSG00000133019	ENSG00000168748.12	0.693369	3.82004e-98	2.90514e-94
ENSG00000133019	ENSG00000182256.11	0.693355	3.86696e-98	2.94083e-94
ENSG00000176884	ENSG00000106113.17	0.693245	4.27099e-98	3.24809e-94
ENSG00000168539	ENSG00000248455.4	0.693166	4.588e-98	3.48917e-94
ENSG00000168539	ENSG00000279685.2	0.693135	4.71803e-98	3.58806e-94
ENSG00000176884	ENSG00000203685.8	0.693017	5.24767e-98	3.99085e-94
ENSG00000133019	ENSG00000167178.14	0.692845	6.12725e-98	4.65977e-94
ENSG00000168539	ENSG00000162374.15	0.692629	7.44567e-98	5.66243e-94
ENSG00000133019	ENSG00000270112.3	0.692617	7.52703e-98	5.72431e-94
ENSG00000168539	ENSG00000106123.10	0.692537	8.08345e-98	6.14746e-94
ENSG00000176884	ENSG00000152495.9	0.692528	8.15291e-98	6.20029e-94
ENSG00000168539	ENSG00000003987.12	0.692362	9.46004e-98	7.19436e-94
ENSG00000168539	ENSG00000261439.1	0.692328	9.75396e-98	7.41789e-94
ENSG00000168539	ENSG00000257151.1	0.692305	9.95838e-98	7.57335e-94
ENSG00000176884	ENSG00000111262.4	0.692257	1.03976e-97	7.90738e-94
ENSG00000176884	ENSG00000135750.13	0.692201	1.09407e-97	8.3204e-94
ENSG00000168539	ENSG00000169891.16	0.692081	1.21786e-97	9.2618e-94
ENSG00000133019	ENSG00000172209.5	0.692023	1.28349e-97	9.76097e-94
ENSG00000168539	ENSG00000166963.11	0.691916	1.41233e-97	1.07407e-93
ENSG00000176884	ENSG00000145708.9	0.691814	1.54825e-97	1.17745e-93
ENSG00000176884	ENSG00000254187.1	0.691807	1.55798e-97	1.18485e-93
ENSG00000133019	ENSG00000256193.4	0.691771	1.60877e-97	1.22347e-93
ENSG00000176884	ENSG00000278518.1	0.691757	1.62934e-97	1.23912e-93
ENSG00000133019	ENSG00000172031.6	0.691268	2.52463e-97	1.91998e-93
ENSG00000176884	ENSG00000188191.13	0.691204	2.67299e-97	2.03281e-93
ENSG00000176884	ENSG00000146267.11	0.691037	3.10608e-97	2.36217e-93
ENSG00000176884	ENSG00000273540.1	0.691006	3.19266e-97	2.42802e-93
ENSG00000168539	ENSG00000124194.14	0.690919	3.44906e-97	2.62301e-93
ENSG00000176884	ENSG00000172247.3	0.690828	3.74355e-97	2.84697e-93
ENSG00000176884	ENSG00000238276.4	0.690825	3.75306e-97	2.8542e-93
ENSG00000168539	ENSG00000169900.6	0.690771	3.93676e-97	2.99391e-93
ENSG00000168539	ENSG00000138311.14	0.690698	4.20444e-97	3.19748e-93
ENSG00000176884	ENSG00000172350.8	0.69069	4.23333e-97	3.21945e-93
ENSG00000168539	ENSG00000231824.3	0.690623	4.49615e-97	3.41932e-93
ENSG00000133019	ENSG00000233705.5	0.690506	4.99122e-97	3.79582e-93
ENSG00000168539	ENSG00000151150.19	0.690493	5.04947e-97	3.84012e-93
ENSG00000176884	ENSG00000168348.3	0.690469	5.15487e-97	3.92028e-93
ENSG00000176884	ENSG00000233123.1	0.690371	5.62519e-97	4.27796e-93
ENSG00000168539	ENSG00000255693.1	0.690341	5.78222e-97	4.39738e-93
ENSG00000168539	ENSG00000186479.4	0.69027	6.15647e-97	4.682e-93
ENSG00000176884	ENSG00000132359.12	0.6902	6.55578e-97	4.98567e-93
ENSG00000133019	ENSG00000186094.15	0.690142	6.89905e-97	5.24672e-93
ENSG00000168539	ENSG00000198944.5	0.690088	7.24431e-97	5.5093e-93
ENSG00000176884	ENSG00000166963.11	0.689992	7.89115e-97	6.00122e-93
ENSG00000176884	ENSG00000184258.6	0.689969	8.04945e-97	6.1216e-93
ENSG00000176884	ENSG00000270111.1	0.689964	8.08928e-97	6.1519e-93
ENSG00000168539	ENSG00000166897.13	0.689959	8.12133e-97	6.17627e-93
ENSG00000133019	ENSG00000163673.6	0.689813	9.24728e-97	7.03255e-93
ENSG00000168539	ENSG00000171772.14	0.689742	9.8507e-97	7.49146e-93
ENSG00000168539	ENSG00000139220.15	0.68973	9.95706e-97	7.57235e-93
ENSG00000168539	ENSG00000172260.12	0.689721	1.00431e-96	7.63777e-93
ENSG00000176884	ENSG00000168959.13	0.68966	1.05958e-96	8.05813e-93
ENSG00000176884	ENSG00000010438.15	0.689645	1.07457e-96	8.17214e-93
ENSG00000176884	ENSG00000020129.14	0.689625	1.09323e-96	8.31401e-93
ENSG00000176884	ENSG00000205562.2	0.689606	1.11249e-96	8.46047e-93
ENSG00000168539	ENSG00000180720.7	0.689556	1.1631e-96	8.84541e-93
ENSG00000176884	ENSG00000101977.18	0.689514	1.20663e-96	9.17641e-93
ENSG00000168539	ENSG00000100362.11	0.689513	1.20788e-96	9.18595e-93
ENSG00000176884	ENSG00000134709.9	0.6893	1.45958e-96	1.11001e-92
ENSG00000168539	ENSG00000179542.14	0.689255	1.51852e-96	1.15483e-92
ENSG00000168539	ENSG00000144290.15	0.689152	1.66419e-96	1.26562e-92
ENSG00000176884	ENSG00000254921.1	0.689119	1.71407e-96	1.30355e-92
ENSG00000133019	ENSG00000175772.10	0.689078	1.7781e-96	1.35225e-92
ENSG00000133019	ENSG00000020129.14	0.689023	1.86589e-96	1.41901e-92
ENSG00000168539	ENSG00000265313.4	0.689005	1.8966e-96	1.44236e-92
ENSG00000168539	ENSG00000280776.1	0.688964	1.96593e-96	1.49509e-92
ENSG00000168539	ENSG00000140015.18	0.688888	2.10305e-96	1.59937e-92
ENSG00000133019	ENSG00000070808.14	0.688847	2.18176e-96	1.65923e-92
ENSG00000176884	ENSG00000154162.12	0.688553	2.82984e-96	2.15209e-92
ENSG00000133019	ENSG00000174145.7	0.688295	3.55524e-96	2.70376e-92
ENSG00000133019	ENSG00000118898.14	0.688286	3.58516e-96	2.72651e-92
ENSG00000168539	ENSG00000187902.10	0.688275	3.62056e-96	2.75343e-92
ENSG00000176884	ENSG00000134343.11	0.688225	3.78203e-96	2.87623e-92
ENSG00000168539	ENSG00000236668.2	0.688208	3.84023e-96	2.92049e-92
ENSG00000176884	ENSG00000185736.14	0.688175	3.95545e-96	3.00812e-92
ENSG00000168539	ENSG00000144406.17	0.688096	4.23907e-96	3.22381e-92
ENSG00000133019	ENSG00000135638.12	0.687926	4.92819e-96	3.74789e-92
ENSG00000133019	ENSG00000220575.6	0.687873	5.16365e-96	3.92696e-92
ENSG00000133019	ENSG00000189181.4	0.687785	5.57886e-96	4.24272e-92
ENSG00000176884	ENSG00000180720.7	0.687738	5.81429e-96	4.42177e-92
ENSG00000176884	ENSG00000255916.1	0.687417	7.72087e-96	5.87172e-92
ENSG00000176884	ENSG00000182870.11	0.687382	7.96209e-96	6.05517e-92
ENSG00000133019	ENSG00000185933.6	0.687238	9.03555e-96	6.87154e-92
ENSG00000168539	ENSG00000197959.12	0.687215	9.22266e-96	7.01383e-92
ENSG00000168539	ENSG00000248285.1	0.687158	9.69858e-96	7.37577e-92
ENSG00000176884	ENSG00000183186.6	0.686835	1.2879e-95	9.79445e-92
ENSG00000176884	ENSG00000186481.14	0.686791	1.33943e-95	1.01864e-91
ENSG00000168539	ENSG00000205899.3	0.686699	1.45197e-95	1.10422e-91
ENSG00000168539	ENSG00000226757.2	0.686515	1.70713e-95	1.29827e-91
ENSG00000168539	ENSG00000147571.4	0.686401	1.88574e-95	1.43411e-91
ENSG00000176884	ENSG00000248455.4	0.68635	1.97306e-95	1.50051e-91
ENSG00000176884	ENSG00000186212.3	0.686207	2.23597e-95	1.70045e-91
ENSG00000168539	ENSG00000172247.3	0.685889	2.95537e-95	2.24756e-91
ENSG00000176884	ENSG00000152822.12	0.685806	3.17862e-95	2.41734e-91
ENSG00000168539	ENSG00000158856.16	0.685785	3.23752e-95	2.46214e-91
ENSG00000176884	ENSG00000249896.1	0.685781	3.24634e-95	2.46884e-91
ENSG00000168539	ENSG00000184305.13	0.685766	3.29167e-95	2.50332e-91
ENSG00000168539	ENSG00000273032.1	0.685245	5.18787e-95	3.94538e-91
ENSG00000133019	ENSG00000185352.8	0.685012	6.35878e-95	4.83585e-91
ENSG00000176884	ENSG00000231536.1	0.68498	6.54235e-95	4.97546e-91
ENSG00000168539	ENSG00000106113.17	0.684927	6.84878e-95	5.2085e-91
ENSG00000176884	ENSG00000279113.1	0.684875	7.16586e-95	5.44964e-91
ENSG00000176884	ENSG00000167680.14	0.684763	7.90549e-95	6.01213e-91
ENSG00000168539	ENSG00000268297.1	0.684598	9.12376e-95	6.93862e-91
ENSG00000133019	ENSG00000162817.6	0.684506	9.88305e-95	7.51606e-91
ENSG00000133019	ENSG00000164794.7	0.684345	1.13735e-94	8.64952e-91
ENSG00000176884	ENSG00000153291.14	0.684342	1.14079e-94	8.67568e-91
ENSG00000168539	ENSG00000183307.3	0.684341	1.1417e-94	8.68262e-91
ENSG00000176884	ENSG00000235949.1	0.68429	1.19264e-94	9.07e-91
ENSG00000176884	ENSG00000180332.6	0.684277	1.20663e-94	9.17639e-91
ENSG00000168539	ENSG00000204677.9	0.684228	1.25947e-94	9.57827e-91
ENSG00000168539	ENSG00000122375.10	0.684132	1.36874e-94	1.04093e-90
ENSG00000176884	ENSG00000233936.1	0.684028	1.49902e-94	1.14001e-90
ENSG00000168539	ENSG00000133958.12	0.683844	1.75799e-94	1.33695e-90
ENSG00000168539	ENSG00000053108.15	0.683807	1.81627e-94	1.38127e-90
ENSG00000133019	ENSG00000272031.2	0.683514	2.34091e-94	1.78026e-90
ENSG00000168539	ENSG00000274002.1	0.683285	2.85444e-94	2.1708e-90
ENSG00000176884	ENSG00000273032.1	0.683197	3.08082e-94	2.34296e-90
ENSG00000168539	ENSG00000188011.5	0.682972	3.74559e-94	2.84852e-90
ENSG00000168539	ENSG00000132359.12	0.682722	4.64799e-94	3.53479e-90
ENSG00000133019	ENSG00000163032.10	0.682655	4.92748e-94	3.74735e-90
ENSG00000176884	ENSG00000150175.13	0.682624	5.05812e-94	3.8467e-90
ENSG00000176884	ENSG00000272479.1	0.682591	5.20539e-94	3.9587e-90
ENSG00000168539	ENSG00000255384.1	0.682429	5.98765e-94	4.55361e-90
ENSG00000168539	ENSG00000123360.10	0.682206	7.25858e-94	5.52015e-90
ENSG00000176884	ENSG00000113319.10	0.681926	9.24493e-94	7.03077e-90
ENSG00000176884	ENSG00000279685.2	0.68185	9.86597e-94	7.50307e-90
ENSG00000176884	ENSG00000146352.11	0.681793	1.03641e-93	7.88187e-90
ENSG00000176884	ENSG00000260412.1	0.681608	1.21479e-93	9.23851e-90
ENSG00000168539	ENSG00000166558.9	0.681395	1.46003e-93	1.11036e-89
ENSG00000176884	ENSG00000255693.1	0.681305	1.57768e-93	1.19983e-89
ENSG00000133019	ENSG00000272321.1	0.681143	1.81288e-93	1.3787e-89
ENSG00000133019	ENSG00000228203.5	0.680969	2.10586e-93	1.60151e-89
ENSG00000168539	ENSG00000224116.5	0.68094	2.15867e-93	1.64167e-89
ENSG00000176884	ENSG00000205899.3	0.680799	2.43606e-93	1.85262e-89
ENSG00000133019	ENSG00000170786.11	0.680471	3.22721e-93	2.4543e-89
ENSG00000168539	ENSG00000172568.4	0.68003	4.70771e-93	3.58022e-89
ENSG00000168539	ENSG00000203685.8	0.679726	6.10155e-93	4.64023e-89
ENSG00000168539	ENSG00000255330.7	0.679633	6.60797e-93	5.02536e-89
ENSG00000176884	ENSG00000188385.10	0.679502	7.38814e-93	5.61868e-89
ENSG00000176884	ENSG00000261325.1	0.679479	7.53664e-93	5.73162e-89
ENSG00000168539	ENSG00000135519.6	0.679366	8.30037e-93	6.31243e-89
ENSG00000176884	ENSG00000122375.10	0.679298	8.7946e-93	6.68829e-89
ENSG00000168539	ENSG00000078725.11	0.679277	8.95189e-93	6.80791e-89
ENSG00000176884	ENSG00000151150.19	0.679259	9.08966e-93	6.91269e-89
ENSG00000133019	ENSG00000106123.10	0.679217	9.42624e-93	7.16866e-89
ENSG00000168539	ENSG00000153291.14	0.67892	1.21333e-92	9.22737e-89
ENSG00000168539	ENSG00000260163.1	0.678893	1.24228e-92	9.44751e-89
ENSG00000168539	ENSG00000183248.10	0.678768	1.38128e-92	1.05046e-88
ENSG00000176884	ENSG00000249487.5	0.678635	1.54748e-92	1.17686e-88
ENSG00000133019	ENSG00000280776.1	0.678523	1.7018e-92	1.29422e-88
ENSG00000133019	ENSG00000152931.7	0.678426	1.84811e-92	1.40549e-88
ENSG00000176884	ENSG00000268297.1	0.678249	2.14797e-92	1.63353e-88
ENSG00000176884	ENSG00000162817.6	0.678226	2.19032e-92	1.66574e-88
ENSG00000168539	ENSG00000267799.1	0.67819	2.25811e-92	1.7173e-88
ENSG00000133019	ENSG00000117069.13	0.678187	2.26362e-92	1.72148e-88
ENSG00000176884	ENSG00000117016.8	0.67807	2.49975e-92	1.90106e-88
ENSG00000133019	ENSG00000236064.1	0.677924	2.82903e-92	2.15148e-88
ENSG00000176884	ENSG00000184305.13	0.677915	2.85239e-92	2.16924e-88
ENSG00000133019	ENSG00000259823.4	0.677871	2.96061e-92	2.25154e-88
ENSG00000168539	ENSG00000238276.4	0.677505	4.03765e-92	3.07063e-88
ENSG00000168539	ENSG00000115252.17	0.677464	4.18089e-92	3.17957e-88
ENSG00000168539	ENSG00000145451.11	0.677325	4.69942e-92	3.57391e-88
ENSG00000176884	ENSG00000179915.19	0.677311	4.75757e-92	3.61813e-88
ENSG00000176884	ENSG00000196581.9	0.677192	5.26222e-92	4.00192e-88
ENSG00000168539	ENSG00000102678.6	0.67714	5.49593e-92	4.17966e-88
ENSG00000176884	ENSG00000091622.14	0.676459	9.7669e-92	7.42772e-88
ENSG00000168539	ENSG00000180332.6	0.676368	1.05461e-91	8.02029e-88
ENSG00000168539	ENSG00000206187.3	0.676315	1.10283e-91	8.38699e-88
ENSG00000133019	ENSG00000112186.10	0.676194	1.22179e-91	9.29168e-88
ENSG00000133019	ENSG00000124203.5	0.676	1.43769e-91	1.09336e-87
ENSG00000168539	ENSG00000179915.19	0.675914	1.54656e-91	1.17616e-87
ENSG00000176884	ENSG00000144406.17	0.675748	1.77753e-91	1.35181e-87
ENSG00000176884	ENSG00000162188.5	0.675564	2.07598e-91	1.57878e-87
ENSG00000133019	ENSG00000260328.1	0.675502	2.18558e-91	1.66213e-87
ENSG00000168539	ENSG00000008086.9	0.675417	2.34857e-91	1.78609e-87
ENSG00000176884	ENSG00000166897.13	0.675378	2.42578e-91	1.84481e-87
ENSG00000176884	ENSG00000162374.15	0.675215	2.7822e-91	2.11587e-87
ENSG00000168539	ENSG00000188848.14	0.675188	2.84588e-91	2.16429e-87
ENSG00000133019	ENSG00000269945.1	0.675162	2.90862e-91	2.212e-87
ENSG00000168539	ENSG00000183287.12	0.674951	3.47157e-91	2.64013e-87
ENSG00000168539	ENSG00000157470.10	0.674912	3.58595e-91	2.72712e-87
ENSG00000168539	ENSG00000250448.1	0.674867	3.72546e-91	2.83321e-87
ENSG00000133019	ENSG00000233532.4	0.67469	4.31924e-91	3.28478e-87
ENSG00000168539	ENSG00000169783.11	0.674666	4.40745e-91	3.35186e-87
ENSG00000176884	ENSG00000115252.17	0.674644	4.49066e-91	3.41514e-87
ENSG00000168539	ENSG00000186481.14	0.67461	4.62047e-91	3.51387e-87
ENSG00000168539	ENSG00000260412.1	0.67451	5.02385e-91	3.82064e-87
ENSG00000176884	ENSG00000255384.1	0.674205	6.48217e-91	4.92969e-87
ENSG00000168539	ENSG00000260166.1	0.67406	7.31954e-91	5.56651e-87
ENSG00000168539	ENSG00000066248.13	0.673993	7.7402e-91	5.88642e-87
ENSG00000176884	ENSG00000133878.7	0.673904	8.3344e-91	6.33831e-87
ENSG00000176884	ENSG00000133958.12	0.67382	8.9398e-91	6.79872e-87
ENSG00000168539	ENSG00000157502.11	0.673793	9.14671e-91	6.95607e-87
ENSG00000168539	ENSG00000250986.1	0.673767	9.34328e-91	7.10556e-87
ENSG00000176884	ENSG00000102678.6	0.673547	1.12312e-90	8.54131e-87
ENSG00000168539	ENSG00000149926.12	0.673326	1.34955e-90	1.02633e-86
ENSG00000168539	ENSG00000263878.1	0.673304	1.37466e-90	1.04543e-86
ENSG00000133019	ENSG00000168830.7	0.673274	1.40996e-90	1.07227e-86
ENSG00000168539	ENSG00000185736.14	0.67322	1.47428e-90	1.12119e-86
ENSG00000176884	ENSG00000145087.11	0.673216	1.47948e-90	1.12514e-86
ENSG00000168539	ENSG00000091482.5	0.673095	1.63547e-90	1.24378e-86
ENSG00000168539	ENSG00000144407.8	0.672826	2.04555e-90	1.55564e-86
ENSG00000133019	ENSG00000278911.1	0.672825	2.04817e-90	1.55763e-86
ENSG00000168539	ENSG00000197322.3	0.672787	2.11374e-90	1.6075e-86
ENSG00000176884	ENSG00000250448.1	0.672775	2.13397e-90	1.62288e-86
ENSG00000168539	ENSG00000249109.1	0.672773	2.13803e-90	1.62597e-86
ENSG00000176884	ENSG00000226757.2	0.672762	2.15782e-90	1.64102e-86
ENSG00000176884	ENSG00000188573.7	0.672747	2.1841e-90	1.66101e-86
ENSG00000168539	ENSG00000150175.13	0.672666	2.33669e-90	1.77705e-86
ENSG00000168539	ENSG00000234646.4	0.672623	2.42128e-90	1.84138e-86
ENSG00000133019	ENSG00000175471.18	0.672536	2.60337e-90	1.97986e-86
ENSG00000176884	ENSG00000065325.11	0.672511	2.65869e-90	2.02193e-86
ENSG00000133019	ENSG00000204588.5	0.672466	2.75926e-90	2.09842e-86
ENSG00000133019	ENSG00000228016.1	0.672383	2.95605e-90	2.24808e-86
ENSG00000168539	ENSG00000073150.12	0.672323	3.1067e-90	2.36265e-86
ENSG00000133019	ENSG00000119125.15	0.672029	3.96572e-90	3.01593e-86
ENSG00000133019	ENSG00000261594.3	0.671939	4.27031e-90	3.24757e-86
ENSG00000168539	ENSG00000266101.1	0.671726	5.09752e-90	3.87666e-86
ENSG00000133019	ENSG00000011083.7	0.67169	5.25071e-90	3.99317e-86
ENSG00000133019	ENSG00000261193.1	0.671647	5.44044e-90	4.13746e-86
ENSG00000176884	ENSG00000221946.6	0.671629	5.52353e-90	4.20064e-86
ENSG00000133019	ENSG00000133101.8	0.67152	6.04093e-90	4.59413e-86
ENSG00000168539	ENSG00000254092.1	0.671485	6.22214e-90	4.73194e-86
ENSG00000168539	ENSG00000163536.11	0.671423	6.54684e-90	4.97887e-86
ENSG00000168539	ENSG00000060566.12	0.671344	6.98742e-90	5.31394e-86
ENSG00000176884	ENSG00000260166.1	0.671317	7.14467e-90	5.43352e-86
ENSG00000168539	ENSG00000129951.17	0.671099	8.55527e-90	6.50628e-86
ENSG00000168539	ENSG00000267750.4	0.670996	9.31247e-90	7.08214e-86
ENSG00000176884	ENSG00000183307.3	0.670963	9.57113e-90	7.27884e-86
ENSG00000168539	ENSG00000165863.15	0.670919	9.92681e-90	7.54934e-86
ENSG00000133019	ENSG00000179673.4	0.670823	1.07433e-89	8.17026e-86
ENSG00000176884	ENSG00000267799.1	0.670775	1.11772e-89	8.50025e-86
ENSG00000176884	ENSG00000189275.3	0.670659	1.22983e-89	9.35289e-86
ENSG00000176884	ENSG00000140015.18	0.670442	1.47117e-89	1.11882e-85
ENSG00000176884	ENSG00000261439.1	0.670368	1.56359e-89	1.18911e-85
ENSG00000176884	ENSG00000147571.4	0.67023	1.752e-89	1.33239e-85
ENSG00000168539	ENSG00000058335.14	0.670214	1.77463e-89	1.34961e-85
ENSG00000133019	ENSG00000260878.1	0.670132	1.89789e-89	1.44334e-85
ENSG00000176884	ENSG00000112290.11	0.670115	1.92489e-89	1.46388e-85
ENSG00000168539	ENSG00000272880.1	0.670047	2.03621e-89	1.54854e-85
ENSG00000176884	ENSG00000162931.10	0.669881	2.33262e-89	1.77396e-85
ENSG00000133019	ENSG00000248540.2	0.669634	2.8579e-89	2.17343e-85
ENSG00000168539	ENSG00000184672.10	0.669342	3.63193e-89	2.76208e-85
ENSG00000133019	ENSG00000224982.3	0.66933	3.66742e-89	2.78907e-85
ENSG00000133019	ENSG00000133135.12	0.669293	3.78238e-89	2.8765e-85
ENSG00000176884	ENSG00000123360.10	0.669265	3.87041e-89	2.94344e-85
ENSG00000168539	ENSG00000065325.11	0.669042	4.64529e-89	3.53275e-85
ENSG00000168539	ENSG00000263667.1	0.668881	5.29968e-89	4.03041e-85
ENSG00000176884	ENSG00000157470.10	0.668796	5.68184e-89	4.32104e-85
ENSG00000133019	ENSG00000172782.10	0.668722	6.03314e-89	4.58821e-85
ENSG00000133019	ENSG00000228971.2	0.668677	6.25931e-89	4.7602e-85
ENSG00000176884	ENSG00000235961.5	0.66865	6.40205e-89	4.86876e-85
ENSG00000176884	ENSG00000249109.1	0.668454	7.5123e-89	5.7131e-85
ENSG00000176884	ENSG00000006128.10	0.668129	9.79519e-89	7.44924e-85
ENSG00000133019	ENSG00000153233.11	0.668102	1.00147e-88	7.61617e-85
ENSG00000176884	ENSG00000263878.1	0.668014	1.07654e-88	8.18711e-85
ENSG00000176884	ENSG00000263667.1	0.667913	1.1689e-88	8.88945e-85
ENSG00000133019	ENSG00000128656.12	0.667892	1.1891e-88	9.04312e-85
ENSG00000133019	ENSG00000138207.11	0.667422	1.74267e-88	1.3253e-84
ENSG00000176884	ENSG00000179477.8	0.667409	1.76249e-88	1.34037e-84
ENSG00000176884	ENSG00000279229.1	0.667376	1.81039e-88	1.3768e-84
ENSG00000168539	ENSG00000152931.7	0.667314	1.90314e-88	1.44734e-84
ENSG00000168539	ENSG00000248738.5	0.667292	1.93765e-88	1.47358e-84
ENSG00000176884	ENSG00000072041.15	0.667265	1.98e-88	1.50579e-84
ENSG00000176884	ENSG00000265313.4	0.667239	2.02232e-88	1.53797e-84
ENSG00000168539	ENSG00000117152.12	0.667203	2.08293e-88	1.58407e-84
ENSG00000176884	ENSG00000187902.10	0.667027	2.40287e-88	1.82738e-84
ENSG00000176884	ENSG00000258441.1	0.666947	2.56514e-88	1.95079e-84
ENSG00000133019	ENSG00000137843.10	0.666851	2.77258e-88	2.10855e-84
ENSG00000176884	ENSG00000172568.4	0.66676	2.98527e-88	2.2703e-84
ENSG00000176884	ENSG00000162951.9	0.666734	3.05007e-88	2.31958e-84
ENSG00000176884	ENSG00000211574.1	0.66668	3.18715e-88	2.42383e-84
ENSG00000176884	ENSG00000169258.6	0.666677	3.19426e-88	2.42923e-84
ENSG00000133019	ENSG00000248485.1	0.666391	4.02609e-88	3.06184e-84
ENSG00000176884	ENSG00000261037.1	0.666366	4.11125e-88	3.1266e-84
ENSG00000176884	ENSG00000150394.12	0.666363	4.11868e-88	3.13226e-84
ENSG00000168539	ENSG00000104140.6	0.666358	4.13753e-88	3.14659e-84
ENSG00000176884	ENSG00000178235.7	0.66628	4.40746e-88	3.35187e-84
ENSG00000176884	ENSG00000110975.7	0.666277	4.41893e-88	3.3606e-84
ENSG00000133019	ENSG00000278195.1	0.665612	7.56767e-88	5.75521e-84
ENSG00000168539	ENSG00000256193.4	0.665486	8.37701e-88	6.37072e-84
ENSG00000168539	ENSG00000278518.1	0.665432	8.75358e-88	6.65709e-84
ENSG00000168539	ENSG00000211574.1	0.665281	9.88618e-88	7.51844e-84
ENSG00000133019	ENSG00000205634.5	0.665098	1.14599e-87	8.71524e-84
ENSG00000176884	ENSG00000182450.11	0.664721	1.55224e-87	1.18048e-83
ENSG00000133019	ENSG00000130368.5	0.664639	1.65925e-87	1.26186e-83
ENSG00000168539	ENSG00000165061.13	0.664632	1.66744e-87	1.26808e-83
ENSG00000176884	ENSG00000267466.1	0.664611	1.69639e-87	1.2901e-83
ENSG00000176884	ENSG00000183287.12	0.66442	1.97892e-87	1.50497e-83
ENSG00000168539	ENSG00000205634.5	0.664359	2.07724e-87	1.57974e-83
ENSG00000133019	ENSG00000171126.7	0.664249	2.26921e-87	1.72573e-83
ENSG00000176884	ENSG00000186479.4	0.664196	2.36961e-87	1.80209e-83
ENSG00000133019	ENSG00000171992.11	0.664103	2.5518e-87	1.94065e-83
ENSG00000168539	ENSG00000206579.8	0.664064	2.63313e-87	2.0025e-83
ENSG00000176884	ENSG00000158856.16	0.663949	2.88947e-87	2.19744e-83
ENSG00000168539	ENSG00000153933.8	0.663828	3.18415e-87	2.42155e-83
ENSG00000176884	ENSG00000153933.8	0.663464	4.26163e-87	3.24097e-83
ENSG00000168539	ENSG00000152822.12	0.663429	4.38242e-87	3.33283e-83
ENSG00000168539	ENSG00000233928.4	0.663101	5.7002e-87	4.33501e-83
ENSG00000168539	ENSG00000154975.12	0.662784	7.34432e-87	5.58536e-83
ENSG00000168539	ENSG00000173452.12	0.662772	7.41737e-87	5.64091e-83
ENSG00000168539	ENSG00000182870.11	0.662748	7.56034e-87	5.74964e-83
ENSG00000176884	ENSG00000145863.9	0.662669	8.05509e-87	6.12589e-83
ENSG00000176884	ENSG00000170214.3	0.662614	8.41595e-87	6.40033e-83
ENSG00000133019	ENSG00000167210.15	0.662572	8.69924e-87	6.61577e-83
ENSG00000176884	ENSG00000060566.12	0.662532	8.98733e-87	6.83486e-83
ENSG00000133019	ENSG00000230852.1	0.662515	9.10736e-87	6.92615e-83
ENSG00000168539	ENSG00000180777.12	0.662437	9.69169e-87	7.37053e-83
ENSG00000133019	ENSG00000260166.1	0.662406	9.93325e-87	7.55424e-83
ENSG00000176884	ENSG00000269387.1	0.662302	1.07961e-86	8.21043e-83
ENSG00000168539	ENSG00000279305.1	0.662279	1.09986e-86	8.36445e-83
ENSG00000176884	ENSG00000105278.9	0.662152	1.21645e-86	9.25107e-83
ENSG00000168539	ENSG00000224404.1	0.662123	1.24503e-86	9.46848e-83
ENSG00000168539	ENSG00000165983.13	0.661914	1.4711e-86	1.11878e-82
ENSG00000133019	ENSG00000196277.14	0.661909	1.47693e-86	1.12321e-82
ENSG00000176884	ENSG00000197959.12	0.661824	1.5798e-86	1.20144e-82
ENSG00000176884	ENSG00000124194.14	0.661756	1.66849e-86	1.26888e-82
ENSG00000176884	ENSG00000279305.1	0.661612	1.87103e-86	1.42292e-82
ENSG00000176884	ENSG00000091482.5	0.661534	1.98989e-86	1.51331e-82
ENSG00000168539	ENSG00000182698.10	0.661526	2.00354e-86	1.52369e-82
ENSG00000168539	ENSG00000226377.1	0.6615	2.04556e-86	1.55565e-82
ENSG00000168539	ENSG00000203877.6	0.661403	2.20861e-86	1.67964e-82
ENSG00000168539	ENSG00000235949.1	0.661291	2.41509e-86	1.83668e-82
ENSG00000168539	ENSG00000185666.13	0.661149	2.7028e-86	2.05548e-82
ENSG00000133019	ENSG00000251621.1	0.661114	2.77828e-86	2.11288e-82
ENSG00000176884	ENSG00000180777.12	0.660976	3.10216e-86	2.35919e-82
ENSG00000133019	ENSG00000112619.7	0.660959	3.14378e-86	2.39085e-82
ENSG00000176884	ENSG00000170074.18	0.660954	3.15592e-86	2.40008e-82
ENSG00000133019	ENSG00000101188.4	0.660849	3.43137e-86	2.60956e-82
ENSG00000176884	ENSG00000233705.5	0.660794	3.5839e-86	2.72556e-82
ENSG00000168539	ENSG00000253734.1	0.660587	4.221e-86	3.21007e-82
ENSG00000133019	ENSG00000178015.4	0.660491	4.55509e-86	3.46415e-82
ENSG00000176884	ENSG00000184156.14	0.660328	5.18543e-86	3.94352e-82
ENSG00000168539	ENSG00000258441.1	0.660206	5.70946e-86	4.34205e-82
ENSG00000133019	ENSG00000259234.4	0.660076	6.32569e-86	4.81069e-82
ENSG00000133019	ENSG00000246363.2	0.660047	6.47338e-86	4.923e-82
ENSG00000168539	ENSG00000127588.4	0.659974	6.85797e-86	5.21549e-82
ENSG00000176884	ENSG00000163536.11	0.65988	7.39017e-86	5.62022e-82
ENSG00000168539	ENSG00000196581.9	0.659738	8.26838e-86	6.2881e-82
ENSG00000168539	ENSG00000233304.4	0.659715	8.4179e-86	6.40181e-82
ENSG00000133019	ENSG00000172350.8	0.659548	9.60312e-86	7.30317e-82
ENSG00000176884	ENSG00000183715.12	0.659435	1.04999e-85	7.98515e-82
ENSG00000168539	ENSG00000165066.12	0.659258	1.20781e-85	9.18541e-82
ENSG00000176884	ENSG00000248738.5	0.659116	1.35044e-85	1.02701e-81
ENSG00000168539	ENSG00000233705.5	0.659021	1.45501e-85	1.10653e-81
ENSG00000168539	ENSG00000135625.7	0.659017	1.45953e-85	1.10998e-81
ENSG00000168539	ENSG00000158445.7	0.658966	1.52007e-85	1.15601e-81
ENSG00000176884	ENSG00000234646.4	0.658904	1.59642e-85	1.21408e-81
ENSG00000176884	ENSG00000255330.7	0.658867	1.64292e-85	1.24944e-81
ENSG00000168539	ENSG00000279113.1	0.658782	1.7571e-85	1.33627e-81
ENSG00000176884	ENSG00000180440.3	0.658754	1.79626e-85	1.36605e-81
ENSG00000133019	ENSG00000226757.2	0.658698	1.87707e-85	1.42751e-81
ENSG00000168539	ENSG00000185742.6	0.658618	1.99805e-85	1.51952e-81
ENSG00000168539	ENSG00000269908.1	0.658602	2.02475e-85	1.53982e-81
ENSG00000168539	ENSG00000279229.1	0.658458	2.26656e-85	1.72372e-81
ENSG00000133019	ENSG00000236268.4	0.658434	2.31046e-85	1.7571e-81
ENSG00000168539	ENSG00000278456.1	0.658308	2.55003e-85	1.93929e-81
ENSG00000168539	ENSG00000225539.4	0.658283	2.60069e-85	1.97783e-81
ENSG00000168539	ENSG00000107518.15	0.658232	2.70744e-85	2.05901e-81
ENSG00000168539	ENSG00000225619.1	0.658223	2.72596e-85	2.07309e-81
ENSG00000168539	ENSG00000183785.13	0.658218	2.73745e-85	2.08183e-81
ENSG00000133019	ENSG00000198932.11	0.65799	3.27327e-85	2.48933e-81
ENSG00000133019	ENSG00000106789.11	0.657793	3.82084e-85	2.90575e-81
ENSG00000168539	ENSG00000274996.1	0.657729	4.01703e-85	3.05495e-81
ENSG00000133019	ENSG00000104059.4	0.65765	4.27524e-85	3.25132e-81
ENSG00000168539	ENSG00000235024.1	0.657628	4.34877e-85	3.30724e-81
ENSG00000176884	ENSG00000206187.3	0.657574	4.53783e-85	3.45102e-81
ENSG00000168539	ENSG00000149742.8	0.657286	5.68445e-85	4.32302e-81
ENSG00000133019	ENSG00000184307.12	0.657095	6.602e-85	5.02082e-81
ENSG00000168539	ENSG00000275286.1	0.656984	7.19984e-85	5.47548e-81
ENSG00000168539	ENSG00000188385.10	0.656825	8.15275e-85	6.20017e-81
ENSG00000168539	ENSG00000136297.13	0.656638	9.42974e-85	7.17132e-81
ENSG00000176884	ENSG00000205035.7	0.656616	9.5956e-85	7.29745e-81
ENSG00000133019	ENSG00000227825.4	0.656614	9.61001e-85	7.30841e-81
ENSG00000133019	ENSG00000123901.7	0.656566	9.97888e-85	7.58894e-81
ENSG00000133019	ENSG00000122733.12	0.656547	1.01293e-84	7.70335e-81
ENSG00000176884	ENSG00000135519.6	0.656302	1.22558e-84	9.32057e-81
ENSG00000168539	ENSG00000253554.4	0.65606	1.48035e-84	1.1258e-80
ENSG00000176884	ENSG00000166558.9	0.656044	1.49908e-84	1.14005e-80
ENSG00000168539	ENSG00000162931.10	0.655959	1.6023e-84	1.21855e-80
ENSG00000176884	ENSG00000275392.1	0.655844	1.75138e-84	1.33192e-80
ENSG00000168539	ENSG00000254507.2	0.655821	1.7838e-84	1.35658e-80
ENSG00000176884	ENSG00000273164.1	0.655655	2.02985e-84	1.5437e-80
ENSG00000176884	ENSG00000008086.9	0.655641	2.05066e-84	1.55953e-80
ENSG00000168539	ENSG00000163793.11	0.655605	2.11035e-84	1.60492e-80
ENSG00000168539	ENSG00000214978.7	0.655603	2.11218e-84	1.60631e-80
ENSG00000176884	ENSG00000260769.1	0.655528	2.23903e-84	1.70279e-80
ENSG00000133019	ENSG00000164742.13	0.655404	2.46632e-84	1.87564e-80
ENSG00000168539	ENSG00000058404.18	0.655348	2.57704e-84	1.95984e-80
ENSG00000176884	ENSG00000280776.1	0.655297	2.68076e-84	2.03872e-80
ENSG00000133019	ENSG00000254187.1	0.654937	3.54383e-84	2.69508e-80
ENSG00000133019	ENSG00000279663.1	0.654881	3.70173e-84	2.81516e-80
ENSG00000168539	ENSG00000230852.1	0.654871	3.72989e-84	2.83658e-80
ENSG00000168539	ENSG00000185760.14	0.65472	4.19464e-84	3.19002e-80
ENSG00000133019	ENSG00000152595.15	0.654607	4.5765e-84	3.48043e-80
ENSG00000168539	ENSG00000163833.7	0.654604	4.58757e-84	3.48884e-80
ENSG00000168539	ENSG00000269387.1	0.654583	4.66392e-84	3.54691e-80
ENSG00000176884	ENSG00000235024.1	0.654446	5.18556e-84	3.94362e-80
ENSG00000168539	ENSG00000257272.1	0.654393	5.4025e-84	4.1086e-80
ENSG00000176884	ENSG00000165983.13	0.654376	5.47412e-84	4.16307e-80
ENSG00000133019	ENSG00000263878.1	0.654289	5.85754e-84	4.45466e-80
ENSG00000168539	ENSG00000229618.1	0.65425	6.03296e-84	4.58806e-80
ENSG00000133019	ENSG00000147676.12	0.654215	6.20002e-84	4.71511e-80
ENSG00000168539	ENSG00000228133.2	0.654115	6.69639e-84	5.0926e-80
ENSG00000176884	ENSG00000102104.8	0.654076	6.90389e-84	5.25041e-80
ENSG00000168539	ENSG00000205035.7	0.653969	7.49755e-84	5.70188e-80
ENSG00000176884	ENSG00000152784.14	0.65393	7.72837e-84	5.87742e-80
ENSG00000168539	ENSG00000272031.2	0.653917	7.80533e-84	5.93595e-80
ENSG00000176884	ENSG00000234965.2	0.653888	7.98664e-84	6.07384e-80
ENSG00000176884	ENSG00000274002.1	0.65385	8.22112e-84	6.25216e-80
ENSG00000168539	ENSG00000184156.14	0.653631	9.73488e-84	7.40337e-80
ENSG00000168539	ENSG00000138207.11	0.653508	1.07055e-83	8.14154e-80
ENSG00000168539	ENSG00000143921.6	0.653483	1.09131e-83	8.29941e-80
ENSG00000168539	ENSG00000226762.1	0.653322	1.23535e-83	9.3948e-80
ENSG00000176884	ENSG00000255136.2	0.653289	1.26756e-83	9.63978e-80
ENSG00000176884	ENSG00000278456.1	0.653127	1.43627e-83	1.09228e-79
ENSG00000133019	ENSG00000145063.13	0.653017	1.56272e-83	1.18845e-79
ENSG00000168539	ENSG00000177108.5	0.652973	1.61687e-83	1.22963e-79
ENSG00000176884	ENSG00000066248.13	0.652873	1.74628e-83	1.32804e-79
ENSG00000176884	ENSG00000167654.16	0.652873	1.74655e-83	1.32825e-79
ENSG00000168539	ENSG00000278840.1	0.652851	1.7762e-83	1.3508e-79
ENSG00000133019	ENSG00000136535.13	0.652753	1.91458e-83	1.45604e-79
ENSG00000176884	ENSG00000163833.7	0.652563	2.21627e-83	1.68547e-79
ENSG00000168539	ENSG00000180440.3	0.652549	2.24045e-83	1.70386e-79
ENSG00000133019	ENSG00000133519.11	0.652535	2.26465e-83	1.72227e-79
ENSG00000176884	ENSG00000183454.12	0.652401	2.51104e-83	1.90965e-79
ENSG00000168539	ENSG00000102104.8	0.652396	2.51922e-83	1.91587e-79
ENSG00000133019	ENSG00000103316.9	0.652339	2.63272e-83	2.00219e-79
ENSG00000176884	ENSG00000204933.3	0.652182	2.97036e-83	2.25896e-79
ENSG00000176884	ENSG00000080224.16	0.652107	3.14585e-83	2.39242e-79
ENSG00000176884	ENSG00000254092.1	0.6521	3.1638e-83	2.40607e-79
ENSG00000176884	ENSG00000228543.1	0.65203	3.3363e-83	2.53726e-79
ENSG00000133019	ENSG00000091137.10	0.652027	3.34533e-83	2.54413e-79
ENSG00000168539	ENSG00000255136.2	0.65198	3.46683e-83	2.63653e-79
ENSG00000176884	ENSG00000183166.9	0.65195	3.5481e-83	2.69833e-79
ENSG00000168539	ENSG00000184515.9	0.651922	3.6264e-83	2.75787e-79
ENSG00000168539	ENSG00000236403.1	0.651717	4.24189e-83	3.22595e-79
ENSG00000176884	ENSG00000121335.11	0.651599	4.64357e-83	3.53143e-79
ENSG00000168539	ENSG00000253762.1	0.651358	5.5846e-83	4.24708e-79
ENSG00000176884	ENSG00000166402.7	0.651211	6.24785e-83	4.75149e-79
ENSG00000168539	ENSG00000072041.15	0.651202	6.2912e-83	4.78446e-79
ENSG00000176884	ENSG00000188848.14	0.651111	6.74494e-83	5.12953e-79
ENSG00000176884	ENSG00000145451.11	0.651046	7.08893e-83	5.39113e-79
ENSG00000176884	ENSG00000129951.17	0.651004	7.32333e-83	5.56939e-79
ENSG00000176884	ENSG00000272880.1	0.650988	7.41215e-83	5.63694e-79
ENSG00000176884	ENSG00000115616.2	0.650969	7.52209e-83	5.72055e-79
ENSG00000133019	ENSG00000067715.12	0.650941	7.6832e-83	5.84307e-79
ENSG00000168539	ENSG00000233930.3	0.650873	8.09375e-83	6.1553e-79
ENSG00000176884	ENSG00000267750.4	0.650764	8.79433e-83	6.68808e-79
ENSG00000133019	ENSG00000100341.10	0.650698	9.25155e-83	7.03581e-79
ENSG00000176884	ENSG00000197322.3	0.650682	9.36332e-83	7.12081e-79
ENSG00000176884	ENSG00000058404.18	0.650635	9.7047e-83	7.38043e-79
ENSG00000168539	ENSG00000228543.1	0.650588	1.00613e-82	7.65159e-79
ENSG00000133019	ENSG00000004660.13	0.650532	1.04941e-82	7.9808e-79
ENSG00000168539	ENSG00000275392.1	0.650151	1.40318e-82	1.06712e-78
ENSG00000133019	ENSG00000154478.3	0.650125	1.43196e-82	1.08901e-78
ENSG00000176884	ENSG00000225619.1	0.650069	1.49379e-82	1.13603e-78
ENSG00000133019	ENSG00000267799.1	0.649998	1.57696e-82	1.19928e-78
ENSG00000168539	ENSG00000152784.14	0.649984	1.59362e-82	1.21195e-78
ENSG00000168539	ENSG00000127152.16	0.649886	1.71676e-82	1.30559e-78
ENSG00000168539	ENSG00000170074.18	0.649838	1.78099e-82	1.35444e-78
ENSG00000168539	ENSG00000112379.8	0.649825	1.79864e-82	1.36786e-78
ENSG00000133019	ENSG00000248469.1	0.649503	2.29843e-82	1.74796e-78
ENSG00000176884	ENSG00000204442.3	0.649426	2.43657e-82	1.85301e-78
ENSG00000176884	ENSG00000254507.2	0.649413	2.45958e-82	1.87051e-78
ENSG00000176884	ENSG00000236922.8	0.649405	2.47563e-82	1.88272e-78
ENSG00000176884	ENSG00000269908.1	0.649404	2.47703e-82	1.88379e-78
ENSG00000176884	ENSG00000138207.11	0.649297	2.68716e-82	2.04359e-78
ENSG00000176884	ENSG00000149926.12	0.649285	2.71101e-82	2.06172e-78
ENSG00000133019	ENSG00000082556.9	0.649181	2.93512e-82	2.23216e-78
ENSG00000133019	ENSG00000233936.1	0.649167	2.96561e-82	2.25535e-78
ENSG00000168539	ENSG00000006128.10	0.64898	3.41756e-82	2.59905e-78
ENSG00000168539	ENSG00000255618.1	0.64876	4.03727e-82	3.07034e-78
ENSG00000176884	ENSG00000183785.13	0.64876	4.03835e-82	3.07116e-78
ENSG00000176884	ENSG00000260163.1	0.648603	4.54738e-82	3.45828e-78
ENSG00000168539	ENSG00000110975.7	0.648546	4.74882e-82	3.61148e-78
ENSG00000168539	ENSG00000204442.3	0.648526	4.82181e-82	3.66699e-78
ENSG00000176884	ENSG00000158445.7	0.648407	5.27511e-82	4.01172e-78
ENSG00000168539	ENSG00000206814.1	0.648311	5.6718e-82	4.31341e-78
ENSG00000168539	ENSG00000255916.1	0.64827	5.84942e-82	4.44848e-78
ENSG00000176884	ENSG00000233928.4	0.648143	6.44025e-82	4.89781e-78
ENSG00000133019	ENSG00000179841.8	0.648015	7.09737e-82	5.39755e-78
ENSG00000176884	ENSG00000149742.8	0.647701	8.99288e-82	6.83909e-78
ENSG00000168539	ENSG00000279663.1	0.647656	9.30486e-82	7.07635e-78
ENSG00000133019	ENSG00000144959.8	0.647614	9.60368e-82	7.3036e-78
ENSG00000168539	ENSG00000265356.1	0.647605	9.67003e-82	7.35406e-78
ENSG00000168539	ENSG00000236922.8	0.647512	1.03701e-81	7.88646e-78
ENSG00000176884	ENSG00000165066.12	0.647394	1.13334e-81	8.61906e-78
ENSG00000133019	ENSG00000258517.1	0.647256	1.25797e-81	9.56687e-78
ENSG00000176884	ENSG00000049283.16	0.647225	1.28726e-81	9.7896e-78
ENSG00000133019	ENSG00000184613.9	0.647197	1.31506e-81	1.00011e-77
ENSG00000168539	ENSG00000228203.5	0.647178	1.3344e-81	1.01481e-77
ENSG00000176884	ENSG00000260878.1	0.647053	1.46567e-81	1.11464e-77
ENSG00000133019	ENSG00000204789.4	0.646992	1.53476e-81	1.16719e-77
ENSG00000133019	ENSG00000229618.1	0.646937	1.59909e-81	1.21611e-77
ENSG00000168539	ENSG00000175352.9	0.646725	1.87662e-81	1.42717e-77
ENSG00000168539	ENSG00000204933.3	0.646641	1.99774e-81	1.51928e-77
ENSG00000133019	ENSG00000130540.12	0.646543	2.15113e-81	1.63594e-77
ENSG00000176884	ENSG00000274996.1	0.646479	2.25776e-81	1.71703e-77
ENSG00000133019	ENSG00000132975.7	0.646433	2.33618e-81	1.77666e-77
ENSG00000168539	ENSG00000253973.2	0.646377	2.43722e-81	1.8535e-77
ENSG00000168539	ENSG00000151229.11	0.646345	2.49628e-81	1.89842e-77
ENSG00000176884	ENSG00000094796.4	0.646344	2.49789e-81	1.89965e-77
ENSG00000176884	ENSG00000122012.12	0.646315	2.55343e-81	1.94188e-77
ENSG00000168539	ENSG00000105048.15	0.646271	2.63918e-81	2.0071e-77
ENSG00000133019	ENSG00000135519.6	0.646201	2.78075e-81	2.11476e-77
ENSG00000176884	ENSG00000029534.18	0.646159	2.86987e-81	2.18253e-77
ENSG00000133019	ENSG00000144550.11	0.646063	3.08427e-81	2.34559e-77
ENSG00000176884	ENSG00000185742.6	0.646047	3.12052e-81	2.37315e-77
ENSG00000133019	ENSG00000248859.2	0.646031	3.16035e-81	2.40344e-77
ENSG00000168539	ENSG00000114757.17	0.64597	3.30723e-81	2.51514e-77
ENSG00000176884	ENSG00000177108.5	0.645968	3.31191e-81	2.51871e-77
ENSG00000176884	ENSG00000256193.4	0.645872	3.5583e-81	2.70609e-77
ENSG00000168539	ENSG00000273164.1	0.645765	3.85667e-81	2.93299e-77
ENSG00000176884	ENSG00000117152.12	0.645484	4.75866e-81	3.61896e-77
ENSG00000176884	ENSG00000135625.7	0.645464	4.83152e-81	3.67437e-77
ENSG00000133019	ENSG00000158856.16	0.645324	5.36281e-81	4.07841e-77
ENSG00000168539	ENSG00000135426.13	0.645181	5.97177e-81	4.54153e-77
ENSG00000133019	ENSG00000132359.12	0.645081	6.43123e-81	4.89095e-77
ENSG00000176884	ENSG00000185760.14	0.644882	7.46374e-81	5.67618e-77
ENSG00000133019	ENSG00000145864.11	0.644706	8.51381e-81	6.47475e-77
ENSG00000133019	ENSG00000146469.11	0.644674	8.72007e-81	6.63161e-77
ENSG00000168539	ENSG00000122012.12	0.644651	8.87015e-81	6.74575e-77
ENSG00000168539	ENSG00000214376.5	0.644509	9.85752e-81	7.49664e-77
ENSG00000168539	ENSG00000106852.14	0.644444	1.03494e-80	7.87075e-77
ENSG00000168539	ENSG00000174453.8	0.644422	1.05179e-80	7.99886e-77
ENSG00000133019	ENSG00000197753.8	0.644402	1.06778e-80	8.12045e-77
ENSG00000168539	ENSG00000134115.11	0.644375	1.08956e-80	8.28611e-77
ENSG00000176884	ENSG00000196358.9	0.644333	1.12452e-80	8.55197e-77
ENSG00000168539	ENSG00000270750.1	0.644317	1.13799e-80	8.65441e-77
ENSG00000168539	ENSG00000197177.14	0.644206	1.23601e-80	9.39987e-77
ENSG00000133019	ENSG00000269210.2	0.644017	1.42233e-80	1.08168e-76
ENSG00000168539	ENSG00000145708.9	0.643906	1.5446e-80	1.17466e-76
ENSG00000133019	ENSG00000157542.9	0.643662	1.85305e-80	1.40924e-76
ENSG00000176884	ENSG00000170579.13	0.643651	1.86705e-80	1.41989e-76
ENSG00000176884	ENSG00000070886.9	0.643613	1.9218e-80	1.46153e-76
ENSG00000133019	ENSG00000118194.17	0.64356	1.99914e-80	1.52035e-76
ENSG00000168539	ENSG00000006071.10	0.643487	2.11009e-80	1.60473e-76
ENSG00000176884	ENSG00000205634.5	0.643247	2.52146e-80	1.91757e-76
ENSG00000176884	ENSG00000146151.11	0.643244	2.52604e-80	1.92105e-76
ENSG00000133019	ENSG00000255087.2	0.643117	2.77749e-80	2.11228e-76
ENSG00000176884	ENSG00000143858.10	0.643024	2.97551e-80	2.26288e-76
ENSG00000168539	ENSG00000115616.2	0.643023	2.97742e-80	2.26432e-76
ENSG00000168539	ENSG00000259017.1	0.643022	2.97899e-80	2.26552e-76
ENSG00000176884	ENSG00000114757.17	0.643008	3.01065e-80	2.2896e-76
ENSG00000168539	ENSG00000176204.12	0.642995	3.04007e-80	2.31197e-76
ENSG00000133019	ENSG00000229672.2	0.642929	3.19126e-80	2.42696e-76
ENSG00000133019	ENSG00000115598.8	0.642879	3.31303e-80	2.51956e-76
ENSG00000176884	ENSG00000184672.10	0.642855	3.37226e-80	2.5646e-76
ENSG00000168539	ENSG00000121335.11	0.642736	3.68403e-80	2.8017e-76
ENSG00000133019	ENSG00000281160.1	0.642701	3.77835e-80	2.87343e-76
ENSG00000168539	ENSG00000170231.14	0.642529	4.29147e-80	3.26366e-76
ENSG00000168539	ENSG00000177679.15	0.64239	4.75852e-80	3.61885e-76
ENSG00000133019	ENSG00000205562.2	0.642357	4.87481e-80	3.70729e-76
ENSG00000168539	ENSG00000257522.4	0.642318	5.01677e-80	3.81525e-76
ENSG00000133019	ENSG00000253554.4	0.642225	5.37467e-80	4.08744e-76
ENSG00000133019	ENSG00000272479.1	0.642219	5.40091e-80	4.10739e-76
ENSG00000168539	ENSG00000240707.2	0.641968	6.50042e-80	4.94357e-76
ENSG00000176884	ENSG00000236668.2	0.641957	6.55217e-80	4.98293e-76
ENSG00000176884	ENSG00000006071.10	0.641887	6.89969e-80	5.24721e-76
ENSG00000176884	ENSG00000107518.15	0.641887	6.9009e-80	5.24814e-76
ENSG00000168539	ENSG00000276627.1	0.641776	7.49058e-80	5.69658e-76
ENSG00000176884	ENSG00000182601.6	0.641671	8.09386e-80	6.15538e-76
ENSG00000168539	ENSG00000146151.11	0.641593	8.57581e-80	6.5219e-76
ENSG00000168539	ENSG00000183166.9	0.641586	8.61672e-80	6.55301e-76
ENSG00000176884	ENSG00000104140.6	0.641465	9.42427e-80	7.16716e-76
ENSG00000133019	ENSG00000118733.15	0.641386	9.98612e-80	7.59444e-76
ENSG00000176884	ENSG00000233304.4	0.641376	1.00577e-79	7.64886e-76
ENSG00000176884	ENSG00000169836.4	0.641351	1.02449e-79	7.79127e-76
ENSG00000168539	ENSG00000169427.5	0.641291	1.07124e-79	8.14675e-76
ENSG00000133019	ENSG00000151948.10	0.641196	1.14871e-79	8.73597e-76
ENSG00000133019	ENSG00000273312.1	0.641157	1.18191e-79	8.98845e-76
ENSG00000176884	ENSG00000182698.10	0.64114	1.19688e-79	9.10225e-76
ENSG00000133019	ENSG00000132671.5	0.641139	1.19829e-79	9.11303e-76
ENSG00000168539	ENSG00000226627.1	0.641079	1.25244e-79	9.52482e-76
ENSG00000176884	ENSG00000271830.1	0.640975	1.35141e-79	1.02775e-75
ENSG00000176884	ENSG00000186907.6	0.640869	1.46161e-79	1.11156e-75
ENSG00000168539	ENSG00000241439.1	0.640834	1.49996e-79	1.14072e-75
ENSG00000168539	ENSG00000273628.1	0.640743	1.603e-79	1.21908e-75
ENSG00000176884	ENSG00000253554.4	0.64071	1.64198e-79	1.24873e-75
ENSG00000176884	ENSG00000165863.15	0.640651	1.71539e-79	1.30455e-75
ENSG00000133019	ENSG00000267034.1	0.640606	1.77294e-79	1.34832e-75
ENSG00000176884	ENSG00000168843.12	0.640599	1.78207e-79	1.35527e-75
ENSG00000176884	ENSG00000183117.16	0.640499	1.91822e-79	1.45881e-75
ENSG00000133019	ENSG00000240253.4	0.640439	2.00397e-79	1.52402e-75
ENSG00000133019	ENSG00000132938.17	0.640401	2.06135e-79	1.56766e-75
ENSG00000168539	ENSG00000145863.9	0.640371	2.10668e-79	1.60213e-75
ENSG00000176884	ENSG00000240707.2	0.640303	2.2148e-79	1.68435e-75
ENSG00000176884	ENSG00000273628.1	0.640243	2.31502e-79	1.76057e-75
ENSG00000168539	ENSG00000277399.3	0.640172	2.43866e-79	1.8546e-75
ENSG00000133019	ENSG00000186377.7	0.640164	2.45348e-79	1.86587e-75
ENSG00000168539	ENSG00000149243.14	0.640118	2.53655e-79	1.92905e-75
ENSG00000168539	ENSG00000204071.8	0.640112	2.54761e-79	1.93746e-75
ENSG00000168539	ENSG00000169836.4	0.639966	2.83704e-79	2.15757e-75
ENSG00000176884	ENSG00000157502.11	0.639815	3.16861e-79	2.40973e-75
ENSG00000133019	ENSG00000149305.5	0.639666	3.53382e-79	2.68747e-75
ENSG00000168539	ENSG00000145063.13	0.639508	3.96796e-79	3.01764e-75
ENSG00000168539	ENSG00000268257.2	0.639417	4.24073e-79	3.22508e-75
ENSG00000133019	ENSG00000177291.3	0.639278	4.69507e-79	3.5706e-75
ENSG00000133019	ENSG00000069424.13	0.639216	4.91055e-79	3.73447e-75
ENSG00000168539	ENSG00000146352.11	0.639163	5.10581e-79	3.88297e-75
ENSG00000176884	ENSG00000266101.1	0.639155	5.13698e-79	3.90668e-75
ENSG00000133019	ENSG00000261325.1	0.639077	5.43831e-79	4.13584e-75
ENSG00000176884	ENSG00000138311.14	0.638952	5.95777e-79	4.53089e-75
ENSG00000133019	ENSG00000270111.1	0.638784	6.73301e-79	5.12045e-75
ENSG00000176884	ENSG00000253973.2	0.638689	7.21778e-79	5.48912e-75
ENSG00000168539	ENSG00000089169.13	0.638659	7.37633e-79	5.6097e-75
ENSG00000133019	ENSG00000205279.7	0.638555	7.95732e-79	6.05154e-75
ENSG00000176884	ENSG00000254973.1	0.638501	8.27781e-79	6.29528e-75
ENSG00000133019	ENSG00000253734.1	0.638477	8.42649e-79	6.40834e-75
ENSG00000168539	ENSG00000166402.7	0.638431	8.71034e-79	6.62421e-75
ENSG00000133019	ENSG00000081985.9	0.63842	8.78514e-79	6.6811e-75
ENSG00000133019	ENSG00000180440.3	0.638363	9.15576e-79	6.96295e-75
ENSG00000168539	ENSG00000049283.16	0.638265	9.8342e-79	7.47891e-75
ENSG00000176884	ENSG00000127588.4	0.638112	1.09949e-78	8.36161e-75
ENSG00000168539	ENSG00000267665.1	0.637679	1.50634e-78	1.14557e-74
ENSG00000176884	ENSG00000253477.4	0.637623	1.56889e-78	1.19314e-74
ENSG00000176884	ENSG00000268257.2	0.637532	1.67547e-78	1.27419e-74
ENSG00000176884	ENSG00000253734.1	0.637456	1.77142e-78	1.34716e-74
ENSG00000168539	ENSG00000186369.8	0.637253	2.05223e-78	1.56072e-74
ENSG00000176884	ENSG00000152931.7	0.637244	2.0652e-78	1.57058e-74
ENSG00000176884	ENSG00000165023.5	0.637141	2.22665e-78	1.69337e-74
ENSG00000176884	ENSG00000183248.10	0.63697	2.52081e-78	1.91707e-74
ENSG00000176884	ENSG00000115041.11	0.636594	3.30971e-78	2.51703e-74
ENSG00000176884	ENSG00000275286.1	0.636569	3.37089e-78	2.56356e-74
ENSG00000168539	ENSG00000203737.3	0.636517	3.49844e-78	2.66056e-74
ENSG00000176884	ENSG00000278840.1	0.636496	3.55336e-78	2.70233e-74
ENSG00000176884	ENSG00000226377.1	0.636468	3.62521e-78	2.75698e-74
ENSG00000176884	ENSG00000141837.17	0.636444	3.68768e-78	2.80448e-74
ENSG00000133019	ENSG00000151834.14	0.636366	3.90359e-78	2.96868e-74
ENSG00000133019	ENSG00000276627.1	0.636315	4.04982e-78	3.07989e-74
ENSG00000168539	ENSG00000260878.1	0.6363	4.09303e-78	3.11275e-74
ENSG00000176884	ENSG00000278012.1	0.636279	4.15753e-78	3.1618e-74
ENSG00000133019	ENSG00000060140.7	0.636129	4.63255e-78	3.52305e-74
ENSG00000133019	ENSG00000125814.16	0.636086	4.77888e-78	3.63434e-74
ENSG00000133019	ENSG00000169884.12	0.636079	4.80227e-78	3.65212e-74
ENSG00000168539	ENSG00000183454.12	0.635952	5.26307e-78	4.00257e-74
ENSG00000168539	ENSG00000259385.1	0.635944	5.29374e-78	4.02589e-74
ENSG00000176884	ENSG00000135426.13	0.635944	5.2956e-78	4.0273e-74
ENSG00000176884	ENSG00000136297.13	0.6359	5.4652e-78	4.15628e-74
ENSG00000176884	ENSG00000204071.8	0.635869	5.59096e-78	4.25193e-74
ENSG00000168539	ENSG00000234891.1	0.635819	5.79454e-78	4.40674e-74
ENSG00000176884	ENSG00000256925.2	0.635804	5.8581e-78	4.45508e-74
ENSG00000168539	ENSG00000266248.1	0.635679	6.41137e-78	4.87585e-74
ENSG00000168539	ENSG00000229672.2	0.635671	6.4498e-78	4.90508e-74
ENSG00000133019	ENSG00000250056.4	0.635322	8.29183e-78	6.30593e-74
ENSG00000168539	ENSG00000095203.13	0.635277	8.57045e-78	6.51783e-74
ENSG00000133019	ENSG00000171246.5	0.635158	9.33558e-78	7.09971e-74
ENSG00000168539	ENSG00000141837.17	0.635115	9.63053e-78	7.32401e-74
ENSG00000176884	ENSG00000055813.5	0.635099	9.74185e-78	7.40868e-74
ENSG00000168539	ENSG00000235026.4	0.634921	1.10707e-77	8.41927e-74
ENSG00000133019	ENSG00000100285.9	0.634834	1.1788e-77	8.96476e-74
ENSG00000176884	ENSG00000112379.8	0.634732	1.26825e-77	9.64504e-74
ENSG00000168539	ENSG00000271830.1	0.634672	1.32468e-77	1.00742e-73
ENSG00000176884	ENSG00000233930.3	0.634671	1.3249e-77	1.00759e-73
ENSG00000168539	ENSG00000029534.18	0.634589	1.40535e-77	1.06877e-73
ENSG00000133019	ENSG00000136750.10	0.634584	1.41075e-77	1.07287e-73
ENSG00000176884	ENSG00000253535.4	0.634517	1.48031e-77	1.12577e-73
ENSG00000176884	ENSG00000177679.15	0.634512	1.48557e-77	1.12977e-73
ENSG00000168539	ENSG00000115041.11	0.634487	1.51247e-77	1.15024e-73
ENSG00000176884	ENSG00000177238.12	0.634468	1.5334e-77	1.16615e-73
ENSG00000168539	ENSG00000253535.4	0.634391	1.62022e-77	1.23218e-73
ENSG00000176884	ENSG00000226762.1	0.634374	1.64085e-77	1.24787e-73
ENSG00000168539	ENSG00000253477.4	0.634329	1.694e-77	1.28829e-73
ENSG00000133019	ENSG00000074590.12	0.634196	1.86401e-77	1.41758e-73
ENSG00000176884	ENSG00000144407.8	0.634087	2.01507e-77	1.53246e-73
ENSG00000133019	ENSG00000104888.8	0.633889	2.32389e-77	1.76732e-73
ENSG00000133019	ENSG00000226762.1	0.633512	3.04321e-77	2.31436e-73
ENSG00000133019	ENSG00000256443.1	0.633506	3.0577e-77	2.32538e-73
ENSG00000168539	ENSG00000165023.5	0.633469	3.13962e-77	2.38768e-73
ENSG00000176884	ENSG00000236403.1	0.633455	3.16967e-77	2.41053e-73
ENSG00000176884	ENSG00000228133.2	0.633235	3.70971e-77	2.82124e-73
ENSG00000133019	ENSG00000112183.13	0.633138	3.97781e-77	3.02513e-73
ENSG00000133019	ENSG00000009709.10	0.633082	4.13938e-77	3.148e-73
ENSG00000176884	ENSG00000230852.1	0.633052	4.22854e-77	3.2158e-73
ENSG00000168539	ENSG00000166342.17	0.633014	4.34631e-77	3.30537e-73
ENSG00000133019	ENSG00000150556.15	0.63301	4.35695e-77	3.31346e-73
ENSG00000176884	ENSG00000165061.13	0.632984	4.43979e-77	3.37646e-73
ENSG00000133019	ENSG00000230246.6	0.632926	4.62818e-77	3.51973e-73
ENSG00000168539	ENSG00000170579.13	0.632866	4.82884e-77	3.67233e-73
ENSG00000176884	ENSG00000183570.15	0.632857	4.86094e-77	3.69675e-73
ENSG00000168539	ENSG00000182450.11	0.632841	4.9162e-77	3.73877e-73
ENSG00000176884	ENSG00000214978.7	0.632674	5.53822e-77	4.21181e-73
ENSG00000133019	ENSG00000196353.10	0.632651	5.63263e-77	4.28361e-73
ENSG00000133019	ENSG00000134709.9	0.632622	5.75122e-77	4.37381e-73
ENSG00000168539	ENSG00000100302.6	0.632607	5.80915e-77	4.41786e-73
ENSG00000168539	ENSG00000070729.12	0.632338	7.03837e-77	5.35268e-73
ENSG00000168539	ENSG00000258702.1	0.632289	7.29128e-77	5.54502e-73
ENSG00000176884	ENSG00000074706.12	0.632258	7.45533e-77	5.66978e-73
ENSG00000133019	ENSG00000218336.6	0.63218	7.87941e-77	5.99229e-73
ENSG00000176884	ENSG00000163793.11	0.632162	7.98305e-77	6.07111e-73
ENSG00000176884	ENSG00000153820.11	0.631858	9.91157e-77	7.53775e-73
ENSG00000133019	ENSG00000104361.8	0.631836	1.00625e-76	7.6525e-73
ENSG00000133019	ENSG00000140798.14	0.631776	1.05026e-76	7.98721e-73
ENSG00000133019	ENSG00000120903.9	0.63175	1.07031e-76	8.13971e-73
ENSG00000168539	ENSG00000196358.9	0.631657	1.14293e-76	8.69201e-73
ENSG00000176884	ENSG00000127152.16	0.63135	1.42161e-76	1.08113e-72
ENSG00000133019	ENSG00000254092.1	0.631315	1.45737e-76	1.10833e-72
ENSG00000133019	ENSG00000267272.4	0.631196	1.58653e-76	1.20656e-72
ENSG00000176884	ENSG00000265356.1	0.631154	1.63463e-76	1.24314e-72
ENSG00000168539	ENSG00000100095.17	0.631137	1.65367e-76	1.25761e-72
ENSG00000133019	ENSG00000129990.13	0.631074	1.72996e-76	1.31563e-72
ENSG00000168539	ENSG00000182566.11	0.630791	2.11442e-76	1.60802e-72
ENSG00000168539	ENSG00000234965.2	0.630789	2.11702e-76	1.60999e-72
ENSG00000176884	ENSG00000169783.11	0.630783	2.12564e-76	1.61655e-72
ENSG00000133019	ENSG00000189108.11	0.63071	2.23818e-76	1.70213e-72
ENSG00000176884	ENSG00000182566.11	0.630638	2.35667e-76	1.79225e-72
ENSG00000176884	ENSG00000257272.1	0.630586	2.44362e-76	1.85837e-72
ENSG00000176884	ENSG00000134115.11	0.630418	2.7526e-76	2.09336e-72
ENSG00000168539	ENSG00000183117.16	0.630333	2.92303e-76	2.22296e-72
ENSG00000168539	ENSG00000185352.8	0.630089	3.47533e-76	2.64299e-72
ENSG00000133019	ENSG00000250770.2	0.629978	3.75742e-76	2.85752e-72
ENSG00000133019	ENSG00000165553.4	0.629926	3.89992e-76	2.96589e-72
ENSG00000168539	ENSG00000177182.9	0.629694	4.59191e-76	3.49215e-72
ENSG00000133019	ENSG00000143674.9	0.629661	4.69996e-76	3.57432e-72
ENSG00000133019	ENSG00000116299.15	0.629609	4.87817e-76	3.70985e-72
ENSG00000133019	ENSG00000047597.5	0.629526	5.17119e-76	3.93269e-72
ENSG00000168539	ENSG00000162494.5	0.62937	5.77295e-76	4.39033e-72
ENSG00000133019	ENSG00000233123.1	0.629344	5.87809e-76	4.47029e-72
ENSG00000168539	ENSG00000258517.1	0.629305	6.04374e-76	4.59627e-72
ENSG00000168539	ENSG00000177238.12	0.629165	6.66774e-76	5.07082e-72
ENSG00000168539	ENSG00000070601.8	0.62897	7.65201e-76	5.81935e-72
ENSG00000133019	ENSG00000253973.2	0.62884	8.38314e-76	6.37538e-72
ENSG00000133019	ENSG00000279952.1	0.628761	8.86625e-76	6.74278e-72
ENSG00000168539	ENSG00000203809.5	0.628704	9.22417e-76	7.01498e-72
ENSG00000176884	ENSG00000157542.9	0.628525	1.04641e-75	7.95797e-72
ENSG00000176884	ENSG00000206579.8	0.628311	1.21583e-75	9.24639e-72
ENSG00000176884	ENSG00000228203.5	0.628099	1.41145e-75	1.07341e-71
ENSG00000176884	ENSG00000224404.1	0.628068	1.44233e-75	1.09689e-71
ENSG00000133019	ENSG00000197106.6	0.628039	1.47241e-75	1.11976e-71
ENSG00000133019	ENSG00000104722.12	0.627907	1.61476e-75	1.22803e-71
ENSG00000176884	ENSG00000225539.4	0.627847	1.68475e-75	1.28125e-71
ENSG00000133019	ENSG00000259964.5	0.627592	2.0143e-75	1.53187e-71
ENSG00000176884	ENSG00000206814.1	0.627581	2.02993e-75	1.54376e-71
ENSG00000168539	ENSG00000279877.1	0.62741	2.28803e-75	1.74005e-71
ENSG00000168539	ENSG00000187486.5	0.627275	2.51329e-75	1.91135e-71
ENSG00000176884	ENSG00000270750.1	0.627164	2.71699e-75	2.06627e-71
ENSG00000133019	ENSG00000258072.1	0.627057	2.92826e-75	2.22694e-71
ENSG00000133019	ENSG00000240207.5	0.627025	2.9947e-75	2.27747e-71
ENSG00000133019	ENSG00000186297.10	0.627011	3.02427e-75	2.29996e-71
ENSG00000133019	ENSG00000119866.19	0.626938	3.18206e-75	2.41996e-71
ENSG00000176884	ENSG00000185666.13	0.62693	3.20072e-75	2.43415e-71
ENSG00000133019	ENSG00000070729.12	0.626906	3.25503e-75	2.47545e-71
ENSG00000168539	ENSG00000094796.4	0.626621	3.96989e-75	3.0191e-71
ENSG00000168539	ENSG00000227895.5	0.626526	4.24273e-75	3.2266e-71
ENSG00000133019	ENSG00000124507.9	0.626475	4.39787e-75	3.34458e-71
ENSG00000176884	ENSG00000273001.1	0.626466	4.42284e-75	3.36357e-71
ENSG00000133019	ENSG00000075073.13	0.626312	4.92639e-75	3.74652e-71
ENSG00000168539	ENSG00000228135.1	0.626163	5.4653e-75	4.15636e-71
ENSG00000168539	ENSG00000251293.1	0.625857	6.76519e-75	5.14493e-71
ENSG00000133019	ENSG00000119782.12	0.625639	7.87098e-75	5.98588e-71
ENSG00000133019	ENSG00000169220.16	0.625586	8.16742e-75	6.21132e-71
ENSG00000176884	ENSG00000234891.1	0.625547	8.39169e-75	6.38188e-71
ENSG00000176884	ENSG00000227895.5	0.625529	8.49867e-75	6.46324e-71
ENSG00000176884	ENSG00000214376.5	0.625462	8.90286e-75	6.77062e-71
ENSG00000133019	ENSG00000157219.3	0.625447	8.99702e-75	6.84223e-71
ENSG00000168539	ENSG00000271440.1	0.625387	9.3751e-75	7.12976e-71
ENSG00000168539	ENSG00000101327.7	0.625284	1.00729e-74	7.66045e-71
ENSG00000133019	ENSG00000117155.15	0.62507	1.16845e-74	8.88606e-71
ENSG00000176884	ENSG00000105048.15	0.624977	1.2465e-74	9.47962e-71
ENSG00000176884	ENSG00000279663.1	0.624827	1.3837e-74	1.0523e-70
ENSG00000168539	ENSG00000174948.5	0.624799	1.41041e-74	1.07262e-70
ENSG00000133019	ENSG00000217236.1	0.624797	1.41246e-74	1.07418e-70
ENSG00000133019	ENSG00000010438.15	0.62468	1.53199e-74	1.16507e-70
ENSG00000133019	ENSG00000164129.10	0.624631	1.58439e-74	1.20493e-70
ENSG00000133019	ENSG00000168081.7	0.624587	1.63381e-74	1.24251e-70
ENSG00000133019	ENSG00000164588.4	0.624544	1.68297e-74	1.2799e-70
ENSG00000176884	ENSG00000102053.12	0.624466	1.77632e-74	1.35089e-70
ENSG00000176884	ENSG00000203877.6	0.624413	1.84247e-74	1.4012e-70
ENSG00000176884	ENSG00000253762.1	0.624339	1.93988e-74	1.47528e-70
ENSG00000168539	ENSG00000155052.14	0.6242	2.13527e-74	1.62387e-70
ENSG00000133019	ENSG00000166863.10	0.624166	2.18636e-74	1.66273e-70
ENSG00000168539	ENSG00000230051.1	0.624097	2.29359e-74	1.74427e-70
ENSG00000133019	ENSG00000234614.1	0.624081	2.31942e-74	1.76392e-70
ENSG00000168539	ENSG00000228358.4	0.624003	2.4474e-74	1.86124e-70
ENSG00000176884	ENSG00000154975.12	0.623835	2.74814e-74	2.08996e-70
ENSG00000176884	ENSG00000148600.13	0.62378	2.85511e-74	2.17131e-70
ENSG00000176884	ENSG00000198354.5	0.623587	3.26165e-74	2.48049e-70
ENSG00000133019	ENSG00000136883.11	0.62355	3.34599e-74	2.54463e-70
ENSG00000133019	ENSG00000145934.14	0.623389	3.73965e-74	2.84401e-70
ENSG00000168539	ENSG00000275011.1	0.623355	3.82838e-74	2.91148e-70
ENSG00000168539	ENSG00000153820.11	0.623329	3.89777e-74	2.96425e-70
ENSG00000133019	ENSG00000185518.10	0.623323	3.9142e-74	2.97675e-70
ENSG00000168539	ENSG00000080224.16	0.623243	4.13662e-74	3.1459e-70
ENSG00000168539	ENSG00000120251.17	0.623235	4.15808e-74	3.16222e-70
ENSG00000168539	ENSG00000197444.8	0.623216	4.21414e-74	3.20486e-70
ENSG00000168539	ENSG00000249695.5	0.623173	4.34091e-74	3.30126e-70
ENSG00000168539	ENSG00000230725.4	0.622666	6.1549e-74	4.6808e-70
ENSG00000176884	ENSG00000175352.9	0.622556	6.63825e-74	5.04839e-70
ENSG00000176884	ENSG00000185352.8	0.622515	6.82777e-74	5.19252e-70
ENSG00000133019	ENSG00000279042.1	0.622502	6.88788e-74	5.23824e-70
ENSG00000133019	ENSG00000233928.4	0.622484	6.97614e-74	5.30536e-70
ENSG00000133019	ENSG00000264714.1	0.622458	7.10076e-74	5.40012e-70
ENSG00000168539	ENSG00000256925.2	0.622403	7.37714e-74	5.61031e-70
ENSG00000168539	ENSG00000170837.2	0.62238	7.49455e-74	5.6996e-70
ENSG00000133019	ENSG00000215475.4	0.622335	7.72517e-74	5.87499e-70
ENSG00000168539	ENSG00000070886.9	0.622114	8.99176e-74	6.83823e-70
ENSG00000176884	ENSG00000100095.17	0.62211	9.0194e-74	6.85925e-70
ENSG00000133019	ENSG00000265313.4	0.622046	9.42391e-74	7.16688e-70
ENSG00000176884	ENSG00000148795.5	0.621937	1.01545e-73	7.72248e-70
ENSG00000176884	ENSG00000102452.14	0.621836	1.08817e-73	8.27555e-70
ENSG00000168539	ENSG00000265015.1	0.621683	1.20916e-73	9.19567e-70
ENSG00000133019	ENSG00000140015.18	0.621666	1.22345e-73	9.30436e-70
ENSG00000168539	ENSG00000276282.1	0.621496	1.37399e-73	1.04492e-69
ENSG00000133019	ENSG00000248673.1	0.621424	1.44364e-73	1.09789e-69
ENSG00000176884	ENSG00000112232.8	0.621243	1.63387e-73	1.24256e-69
ENSG00000133019	ENSG00000280105.1	0.620961	1.98211e-73	1.50739e-69
ENSG00000133019	ENSG00000107954.9	0.620817	2.18648e-73	1.66282e-69
ENSG00000168539	ENSG00000141622.12	0.620724	2.33047e-73	1.77232e-69
ENSG00000176884	ENSG00000235026.4	0.620683	2.39634e-73	1.82242e-69
ENSG00000168539	ENSG00000278012.1	0.620578	2.57516e-73	1.95841e-69
ENSG00000176884	ENSG00000174453.8	0.620533	2.65536e-73	2.0194e-69
ENSG00000176884	ENSG00000159516.8	0.620491	2.732e-73	2.07769e-69
ENSG00000168539	ENSG00000136928.4	0.620439	2.83179e-73	2.15357e-69
ENSG00000133019	ENSG00000182230.10	0.620407	2.89285e-73	2.20001e-69
ENSG00000168539	ENSG00000248673.1	0.620308	3.09681e-73	2.35512e-69
ENSG00000176884	ENSG00000197177.14	0.62028	3.15558e-73	2.39982e-69
ENSG00000176884	ENSG00000279951.1	0.620108	3.54952e-73	2.69941e-69
ENSG00000176884	ENSG00000167549.17	0.620102	3.56178e-73	2.70873e-69
ENSG00000133019	ENSG00000091482.5	0.620072	3.63761e-73	2.7664e-69
ENSG00000168539	ENSG00000281106.1	0.619961	3.92176e-73	2.98249e-69
ENSG00000168539	ENSG00000279951.1	0.619834	4.2777e-73	3.25319e-69
ENSG00000176884	ENSG00000266248.1	0.619712	4.64813e-73	3.5349e-69
ENSG00000176884	ENSG00000147432.5	0.61971	4.6545e-73	3.53975e-69
ENSG00000176884	ENSG00000259017.1	0.619594	5.03636e-73	3.83015e-69
ENSG00000168539	ENSG00000102452.14	0.619518	5.30338e-73	4.03322e-69
ENSG00000176884	ENSG00000257522.4	0.619461	5.51256e-73	4.1923e-69
ENSG00000133019	ENSG00000150361.10	0.619274	6.25839e-73	4.75951e-69
ENSG00000168539	ENSG00000074706.12	0.619058	7.24753e-73	5.51174e-69
ENSG00000168539	ENSG00000254973.1	0.618979	7.6477e-73	5.81608e-69
ENSG00000133019	ENSG00000058404.18	0.618942	7.84386e-73	5.96526e-69
ENSG00000168539	ENSG00000225675.2	0.618807	8.5977e-73	6.53855e-69
ENSG00000168539	ENSG00000226695.1	0.618782	8.74513e-73	6.65067e-69
ENSG00000168539	ENSG00000197360.8	0.618744	8.97176e-73	6.82302e-69
ENSG00000168539	ENSG00000102053.12	0.61844	1.10249e-72	8.38441e-69
ENSG00000133019	ENSG00000145242.12	0.618431	1.10894e-72	8.43351e-69
ENSG00000176884	ENSG00000173452.12	0.61827	1.23692e-72	9.40674e-69
ENSG00000168539	ENSG00000265215.1	0.618254	1.25019e-72	9.50771e-69
ENSG00000168539	ENSG00000204603.5	0.618158	1.3341e-72	1.01459e-68
ENSG00000176884	ENSG00000258517.1	0.617992	1.49296e-72	1.13539e-68
ENSG00000168539	ENSG00000130032.14	0.617814	1.68455e-72	1.2811e-68
ENSG00000133019	ENSG00000203737.3	0.61755	2.01295e-72	1.53085e-68
ENSG00000168539	ENSG00000258240.4	0.617248	2.4688e-72	1.87752e-68
ENSG00000168539	ENSG00000270883.1	0.617162	2.61486e-72	1.9886e-68
ENSG00000168539	ENSG00000205704.6	0.617085	2.75527e-72	2.09538e-68
ENSG00000176884	ENSG00000174948.5	0.617054	2.81297e-72	2.13926e-68
ENSG00000133019	ENSG00000249436.1	0.616897	3.12714e-72	2.37819e-68
ENSG00000176884	ENSG00000276282.1	0.616885	3.1523e-72	2.39732e-68
ENSG00000133019	ENSG00000205899.3	0.616769	3.4092e-72	2.5927e-68
ENSG00000133019	ENSG00000176349.10	0.616726	3.50932e-72	2.66883e-68
ENSG00000168539	ENSG00000140465.12	0.616537	3.98556e-72	3.03102e-68
ENSG00000133019	ENSG00000137825.9	0.616479	4.14342e-72	3.15107e-68
ENSG00000168539	ENSG00000147432.5	0.616452	4.2206e-72	3.20977e-68
ENSG00000176884	ENSG00000241439.1	0.616315	4.62737e-72	3.51911e-68
ENSG00000176884	ENSG00000205704.6	0.616273	4.76003e-72	3.62e-68
ENSG00000168539	ENSG00000204396.9	0.616169	5.10443e-72	3.88192e-68
ENSG00000176884	ENSG00000230453.8	0.616109	5.31311e-72	4.04062e-68
ENSG00000133019	ENSG00000145335.14	0.615975	5.81297e-72	4.42076e-68
ENSG00000176884	ENSG00000155966.12	0.615863	6.26801e-72	4.76682e-68
ENSG00000168539	ENSG00000198822.9	0.615532	7.82899e-72	5.95394e-68
ENSG00000176884	ENSG00000166342.17	0.615501	7.99087e-72	6.07706e-68
ENSG00000168539	ENSG00000236268.4	0.615307	9.09944e-72	6.92013e-68
ENSG00000176884	ENSG00000120251.17	0.615193	9.82219e-72	7.46977e-68
ENSG00000176884	ENSG00000089169.13	0.615163	1.00216e-71	7.62145e-68
ENSG00000176884	ENSG00000272031.2	0.61484	1.24465e-71	9.46557e-68
ENSG00000176884	ENSG00000264860.1	0.614835	1.24825e-71	9.49295e-68
ENSG00000133019	ENSG00000101438.3	0.614805	1.27374e-71	9.6868e-68
ENSG00000168539	ENSG00000169271.2	0.614587	1.47397e-71	1.12095e-67
ENSG00000176884	ENSG00000258702.1	0.614564	1.49617e-71	1.13784e-67
ENSG00000168539	ENSG00000128656.12	0.614548	1.51256e-71	1.1503e-67
ENSG00000176884	ENSG00000255618.1	0.614145	1.97944e-71	1.50536e-67
ENSG00000133019	ENSG00000112053.12	0.614124	2.00761e-71	1.52679e-67
ENSG00000176884	ENSG00000228358.4	0.614062	2.09221e-71	1.59112e-67
ENSG00000168539	ENSG00000164236.10	0.613975	2.21754e-71	1.68644e-67
ENSG00000176884	ENSG00000272449.1	0.613897	2.33495e-71	1.77573e-67
ENSG00000168539	ENSG00000260769.1	0.613866	2.38414e-71	1.81314e-67
ENSG00000133019	ENSG00000022355.13	0.613741	2.59223e-71	1.97139e-67
ENSG00000133019	ENSG00000107130.8	0.613709	2.64689e-71	2.01296e-67
ENSG00000168539	ENSG00000274253.3	0.613596	2.85444e-71	2.1708e-67
ENSG00000176884	ENSG00000204176.12	0.613587	2.87113e-71	2.18349e-67
ENSG00000168539	ENSG00000055813.5	0.613564	2.91482e-71	2.21672e-67
ENSG00000176884	ENSG00000203737.3	0.613554	2.93496e-71	2.23204e-67
ENSG00000176884	ENSG00000143921.6	0.613509	3.02392e-71	2.29969e-67
ENSG00000176884	ENSG00000249695.5	0.613491	3.06065e-71	2.32763e-67
ENSG00000176884	ENSG00000226627.1	0.613459	3.1274e-71	2.37839e-67
ENSG00000133019	ENSG00000183785.13	0.613358	3.34506e-71	2.54391e-67
[truncated: 5,737 more rows]

## Sheet: significant_negative_correlatio
gene_of_interest	target	pearson	pvalue	adj_pval
ENSG00000176884	ENSG00000174021.9	-0.688942	2.00501e-96	1.52481e-92
ENSG00000168539	ENSG00000126453.8	-0.686679	1.47777e-95	1.12384e-91
ENSG00000168539	ENSG00000174021.9	-0.674817	3.8858e-91	2.95515e-87
ENSG00000176884	ENSG00000126453.8	-0.669286	3.80192e-89	2.89136e-85
ENSG00000176884	ENSG00000149257.12	-0.667007	2.44268e-88	1.85766e-84
ENSG00000176884	ENSG00000177426.19	-0.657581	4.51305e-85	3.43217e-81
ENSG00000168539	ENSG00000257702.3	-0.65345	1.11945e-83	8.51338e-80
ENSG00000168539	ENSG00000157227.11	-0.650207	1.34518e-82	1.02301e-78
ENSG00000168539	ENSG00000026025.12	-0.649939	1.64891e-82	1.254e-78
ENSG00000168539	ENSG00000177426.19	-0.649917	1.67738e-82	1.27565e-78
ENSG00000168539	ENSG00000100504.15	-0.644523	9.75807e-81	7.42101e-77
ENSG00000176884	ENSG00000257702.3	-0.644166	1.27348e-80	9.68483e-77
ENSG00000176884	ENSG00000112773.14	-0.642885	3.29778e-80	2.50796e-76
ENSG00000168539	ENSG00000117519.14	-0.64187	6.98629e-80	5.31307e-76
ENSG00000176884	ENSG00000065485.16	-0.64172	7.80594e-80	5.93642e-76
ENSG00000176884	ENSG00000116157.5	-0.640146	2.48528e-79	1.89005e-75
ENSG00000176884	ENSG00000026025.12	-0.639465	4.09296e-79	3.11269e-75
ENSG00000168539	ENSG00000149257.12	-0.639394	4.31126e-79	3.27871e-75
ENSG00000176884	ENSG00000157227.11	-0.637978	1.21206e-78	9.2177e-75
ENSG00000176884	ENSG00000196954.11	-0.637863	1.31736e-78	1.00185e-74
ENSG00000176884	ENSG00000117519.14	-0.634781	1.22426e-77	9.31051e-74
ENSG00000176884	ENSG00000100504.15	-0.633797	2.48117e-77	1.88693e-73
ENSG00000168539	ENSG00000137752.21	-0.632867	4.82684e-77	3.67081e-73
ENSG00000176884	ENSG00000213719.7	-0.632362	6.9207e-77	5.26319e-73
ENSG00000168539	ENSG00000065485.16	-0.63004	3.59816e-76	2.7364e-72
ENSG00000176884	ENSG00000102359.5	-0.629451	5.4528e-76	4.14685e-72
ENSG00000168539	ENSG00000112773.14	-0.629005	7.46262e-76	5.67532e-72
ENSG00000168539	ENSG00000153250.16	-0.628927	7.88663e-76	5.99778e-72
ENSG00000176884	ENSG00000153250.16	-0.627985	1.52913e-75	1.1629e-71
ENSG00000168539	ENSG00000182718.15	-0.625103	1.14254e-74	8.68899e-71
ENSG00000168539	ENSG00000196954.11	-0.624756	1.4535e-74	1.10539e-70
ENSG00000176884	ENSG00000006327.12	-0.623899	2.63001e-74	2.00012e-70
ENSG00000176884	ENSG00000163191.5	-0.623168	4.35528e-74	3.31219e-70
ENSG00000168539	ENSG00000102034.15	-0.621733	1.16859e-73	8.88712e-70
ENSG00000176884	ENSG00000182718.15	-0.621459	1.40918e-73	1.07168e-69
ENSG00000176884	ENSG00000122861.14	-0.621289	1.58332e-73	1.20411e-69
ENSG00000176884	ENSG00000105559.10	-0.620268	3.18266e-73	2.42041e-69
ENSG00000168539	ENSG00000185404.15	-0.619578	5.091e-73	3.87171e-69
ENSG00000168539	ENSG00000140030.5	-0.618713	9.16254e-73	6.96811e-69
ENSG00000176884	ENSG00000244509.3	-0.618076	1.41106e-72	1.07311e-68
ENSG00000176884	ENSG00000163430.8	-0.617513	2.06447e-72	1.57003e-68
ENSG00000176884	ENSG00000038945.13	-0.616143	5.19391e-72	3.94997e-68
ENSG00000168539	ENSG00000213719.7	-0.615989	5.75922e-72	4.37988e-68
ENSG00000176884	ENSG00000137752.21	-0.615666	7.15715e-72	5.44301e-68
ENSG00000176884	ENSG00000140030.5	-0.614304	1.78009e-71	1.35376e-67
ENSG00000168539	ENSG00000011028.12	-0.614126	2.00456e-71	1.52447e-67
ENSG00000168539	ENSG00000143851.14	-0.612247	6.99126e-71	5.31685e-67
ENSG00000168539	ENSG00000116157.5	-0.611401	1.22388e-70	9.3076e-67
ENSG00000176884	ENSG00000188060.6	-0.611098	1.49514e-70	1.13706e-66
ENSG00000176884	ENSG00000197712.10	-0.610402	2.3657e-70	1.79911e-66
ENSG00000168539	ENSG00000163191.5	-0.610192	2.71662e-70	2.06599e-66
ENSG00000168539	ENSG00000163694.13	-0.610074	2.93496e-70	2.23204e-66
ENSG00000176884	ENSG00000011028.12	-0.610066	2.95152e-70	2.24463e-66
ENSG00000168539	ENSG00000110077.13	-0.609585	4.04698e-70	3.07773e-66
ENSG00000168539	ENSG00000143226.12	-0.609259	5.01226e-70	3.81182e-66
ENSG00000168539	ENSG00000038945.13	-0.608762	6.94187e-70	5.27929e-66
ENSG00000168539	ENSG00000105559.10	-0.607777	1.32104e-69	1.00465e-65
ENSG00000176884	ENSG00000204397.6	-0.607748	1.34588e-69	1.02354e-65
ENSG00000176884	ENSG00000143226.12	-0.607676	1.41105e-69	1.0731e-65
ENSG00000176884	ENSG00000187498.13	-0.605581	5.50233e-69	4.18453e-65
ENSG00000168539	ENSG00000122861.14	-0.604751	9.40917e-69	7.15568e-65
ENSG00000176884	ENSG00000185404.15	-0.604162	1.37502e-68	1.0457e-64
ENSG00000168539	ENSG00000188001.8	-0.603175	2.59307e-68	1.97203e-64
ENSG00000168539	ENSG00000140575.11	-0.60224	4.71837e-68	3.58832e-64
ENSG00000168539	ENSG00000204397.6	-0.602216	4.79137e-68	3.64383e-64
ENSG00000176884	ENSG00000110077.13	-0.602097	5.17266e-68	3.93381e-64
ENSG00000176884	ENSG00000143851.14	-0.601872	5.97222e-68	4.54187e-64
ENSG00000168539	ENSG00000163430.8	-0.601699	6.66838e-68	5.07131e-64
ENSG00000168539	ENSG00000244509.3	-0.601406	8.04145e-68	6.11553e-64
ENSG00000176884	ENSG00000280206.1	-0.60137	8.22396e-68	6.25432e-64
ENSG00000168539	ENSG00000156869.11	-0.600592	1.35013e-67	1.02677e-63
ENSG00000176884	ENSG00000067182.6	-0.600058	1.89456e-67	1.44081e-63
ENSG00000168539	ENSG00000006327.12	-0.597379	1.02931e-66	7.82794e-63
ENSG00000176884	ENSG00000135862.5	-0.597331	1.06046e-66	8.06477e-63
ENSG00000176884	ENSG00000135842.15	-0.596932	1.36238e-66	1.03609e-62
ENSG00000176884	ENSG00000234380.1	-0.596303	2.02209e-66	1.5378e-62
ENSG00000168539	ENSG00000105948.12	-0.596233	2.11231e-66	1.60641e-62
ENSG00000168539	ENSG00000067066.15	-0.596015	2.42067e-66	1.84092e-62
ENSG00000176884	ENSG00000105948.12	-0.595736	2.88167e-66	2.19151e-62
ENSG00000168539	ENSG00000102359.5	-0.595508	3.3239e-66	2.52783e-62
ENSG00000176884	ENSG00000118508.4	-0.5944	6.62885e-66	5.04124e-62
ENSG00000168539	ENSG00000135842.15	-0.594023	8.38289e-66	6.37519e-62
ENSG00000176884	ENSG00000145779.7	-0.593946	8.79089e-66	6.68547e-62
ENSG00000168539	ENSG00000158869.9	-0.593895	9.07266e-66	6.89975e-62
ENSG00000176884	ENSG00000102034.15	-0.593881	9.15465e-66	6.96211e-62
ENSG00000176884	ENSG00000275395.3	-0.593631	1.06937e-65	8.13254e-62
ENSG00000168539	ENSG00000254685.5	-0.593391	1.24079e-65	9.43622e-62
ENSG00000168539	ENSG00000118508.4	-0.592975	1.60566e-65	1.2211e-61
ENSG00000176884	ENSG00000121552.3	-0.592938	1.64273e-65	1.2493e-61
ENSG00000176884	ENSG00000234961.1	-0.591545	3.88084e-65	2.95138e-61
ENSG00000176884	ENSG00000167553.13	-0.591526	3.92676e-65	2.9863e-61
ENSG00000168539	ENSG00000067182.6	-0.591279	4.57176e-65	3.47682e-61
ENSG00000176884	ENSG00000261295.1	-0.591062	5.22609e-65	3.97444e-61
ENSG00000168539	ENSG00000188060.6	-0.591059	5.2343e-65	3.98069e-61
ENSG00000168539	ENSG00000064012.20	-0.59098	5.49368e-65	4.17795e-61
ENSG00000176884	ENSG00000145703.14	-0.590765	6.27102e-65	4.76911e-61
ENSG00000176884	ENSG00000134013.14	-0.590712	6.48036e-65	4.92831e-61
ENSG00000176884	ENSG00000158869.9	-0.589962	1.02619e-64	7.8042e-61
ENSG00000176884	ENSG00000067066.15	-0.589737	1.17804e-64	8.959e-61
ENSG00000168539	ENSG00000155465.17	-0.588614	2.33924e-64	1.779e-60
ENSG00000176884	ENSG00000140575.11	-0.588417	2.63709e-64	2.00551e-60
ENSG00000168539	ENSG00000234961.1	-0.588237	2.94348e-64	2.23851e-60
ENSG00000168539	ENSG00000117228.9	-0.587365	4.99982e-64	3.80236e-60
ENSG00000176884	ENSG00000163453.10	-0.587296	5.21343e-64	3.96481e-60
ENSG00000176884	ENSG00000188001.8	-0.587086	5.92308e-64	4.5045e-60
ENSG00000168539	ENSG00000106066.12	-0.587079	5.94619e-64	4.52208e-60
ENSG00000176884	ENSG00000156869.11	-0.586952	6.42283e-64	4.88457e-60
ENSG00000176884	ENSG00000237493.3	-0.586782	7.11877e-64	5.41383e-60
ENSG00000176884	ENSG00000166483.9	-0.586592	7.98855e-64	6.0753e-60
ENSG00000168539	ENSG00000145779.7	-0.586399	8.97607e-64	6.82631e-60
ENSG00000176884	ENSG00000171657.5	-0.586329	9.36674e-64	7.12341e-60
ENSG00000176884	ENSG00000117228.9	-0.585932	1.19065e-63	9.05492e-60
ENSG00000176884	ENSG00000163694.13	-0.585636	1.42328e-63	1.0824e-59
ENSG00000176884	ENSG00000161638.9	-0.585565	1.48614e-63	1.13021e-59
ENSG00000176884	ENSG00000121039.8	-0.585449	1.5934e-63	1.21178e-59
ENSG00000176884	ENSG00000135046.12	-0.585391	1.6506e-63	1.25528e-59
ENSG00000176884	ENSG00000134871.16	-0.585125	1.9373e-63	1.47331e-59
ENSG00000176884	ENSG00000231991.4	-0.584048	3.70097e-63	2.81459e-59
ENSG00000168539	ENSG00000135046.12	-0.58379	4.32165e-63	3.28661e-59
ENSG00000176884	ENSG00000179627.9	-0.583711	4.53133e-63	3.44607e-59
ENSG00000176884	ENSG00000064012.20	-0.583207	6.12601e-63	4.65883e-59
ENSG00000176884	ENSG00000109861.14	-0.582473	9.49945e-63	7.22433e-59
ENSG00000168539	ENSG00000197712.10	-0.58211	1.17956e-62	8.97053e-59
ENSG00000176884	ENSG00000121316.9	-0.581951	1.29665e-62	9.86102e-59
ENSG00000168539	ENSG00000179627.9	-0.581871	1.35966e-62	1.03402e-58
ENSG00000176884	ENSG00000188313.11	-0.581737	1.47248e-62	1.11982e-58
ENSG00000168539	ENSG00000121039.8	-0.580618	2.86377e-62	2.1779e-58
ENSG00000168539	ENSG00000175505.10	-0.580588	2.915e-62	2.21686e-58
ENSG00000176884	ENSG00000105991.7	-0.580463	3.13966e-62	2.38771e-58
ENSG00000168539	ENSG00000109861.14	-0.580425	3.21023e-62	2.44138e-58
ENSG00000176884	ENSG00000188641.11	-0.57997	4.2024e-62	3.19593e-58
ENSG00000168539	ENSG00000275395.3	-0.579944	4.26846e-62	3.24616e-58
ENSG00000176884	ENSG00000175505.10	-0.579682	4.98247e-62	3.78917e-58
ENSG00000168539	ENSG00000159216.17	-0.579631	5.13439e-62	3.9047e-58
ENSG00000168539	ENSG00000181481.12	-0.579438	5.75757e-62	4.37864e-58
ENSG00000168539	ENSG00000121552.3	-0.579264	6.3803e-62	4.85222e-58
ENSG00000168539	ENSG00000188641.11	-0.57899	7.49842e-62	5.70255e-58
ENSG00000168539	ENSG00000110079.15	-0.5786	9.43721e-62	7.177e-58
ENSG00000176884	ENSG00000155465.17	-0.578558	9.66957e-62	7.35371e-58
ENSG00000176884	ENSG00000116815.14	-0.577602	1.69642e-61	1.29013e-57
ENSG00000168539	ENSG00000121316.9	-0.577403	1.90671e-61	1.45005e-57
ENSG00000168539	ENSG00000234380.1	-0.577389	1.92232e-61	1.46193e-57
ENSG00000176884	ENSG00000214274.8	-0.577324	1.99638e-61	1.51825e-57
ENSG00000176884	ENSG00000134668.11	-0.57529	6.5515e-61	4.98242e-57
ENSG00000176884	ENSG00000181481.12	-0.574515	1.02785e-60	7.81679e-57
ENSG00000176884	ENSG00000147065.15	-0.574503	1.03513e-60	7.87218e-57
ENSG00000168539	ENSG00000145703.14	-0.574095	1.31171e-60	9.97558e-57
ENSG00000168539	ENSG00000116815.14	-0.57306	2.38828e-60	1.81629e-56
ENSG00000176884	ENSG00000116774.10	-0.57301	2.45726e-60	1.86875e-56
ENSG00000168539	ENSG00000237493.3	-0.573003	2.46737e-60	1.87644e-56
ENSG00000168539	ENSG00000171657.5	-0.572987	2.49048e-60	1.89401e-56
ENSG00000168539	ENSG00000188313.11	-0.572768	2.82659e-60	2.14963e-56
ENSG00000176884	ENSG00000230812.4	-0.572689	2.95733e-60	2.24905e-56
ENSG00000168539	ENSG00000231991.4	-0.572152	4.03173e-60	3.06613e-56
ENSG00000168539	ENSG00000230812.4	-0.571646	5.3929e-60	4.1013e-56
ENSG00000176884	ENSG00000159216.17	-0.571643	5.40183e-60	4.1081e-56
ENSG00000168539	ENSG00000135862.5	-0.571577	5.61033e-60	4.26666e-56
ENSG00000176884	ENSG00000254685.5	-0.571526	5.77895e-60	4.39489e-56
ENSG00000168539	ENSG00000197646.7	-0.571417	6.15366e-60	4.67986e-56
ENSG00000168539	ENSG00000239713.6	-0.57136	6.35689e-60	4.83441e-56
ENSG00000168539	ENSG00000214274.8	-0.570638	9.61909e-60	7.31532e-56
ENSG00000176884	ENSG00000260027.4	-0.570377	1.11692e-59	8.49416e-56
ENSG00000176884	ENSG00000162493.15	-0.569578	1.76333e-59	1.34101e-55
ENSG00000168539	ENSG00000134013.14	-0.569568	1.77369e-59	1.34889e-55
ENSG00000168539	ENSG00000163453.10	-0.56933	2.03135e-59	1.54484e-55
ENSG00000176884	ENSG00000239713.6	-0.569303	2.06322e-59	1.56908e-55
ENSG00000176884	ENSG00000254545.1	-0.568975	2.48698e-59	1.89135e-55
ENSG00000176884	ENSG00000159403.14	-0.568579	3.11614e-59	2.36983e-55
ENSG00000168539	ENSG00000175857.7	-0.568504	3.2527e-59	2.47368e-55
ENSG00000176884	ENSG00000176014.11	-0.568285	3.68191e-59	2.8001e-55
ENSG00000176884	ENSG00000168995.12	-0.568102	4.08564e-59	3.10713e-55
ENSG00000168539	ENSG00000168995.12	-0.56701	7.59027e-59	5.7724e-55
ENSG00000168539	ENSG00000129450.7	-0.566908	8.04131e-59	6.11542e-55
ENSG00000176884	ENSG00000154589.5	-0.56683	8.40024e-59	6.38838e-55
ENSG00000176884	ENSG00000101608.11	-0.566532	9.94375e-59	7.56223e-55
ENSG00000176884	ENSG00000137767.12	-0.566458	1.03694e-58	7.88593e-55
ENSG00000168539	ENSG00000159403.14	-0.566196	1.20232e-58	9.14365e-55
ENSG00000176884	ENSG00000091879.12	-0.566186	1.20903e-58	9.19467e-55
ENSG00000168539	ENSG00000167553.13	-0.565914	1.40943e-58	1.07187e-54
ENSG00000168539	ENSG00000118640.9	-0.565609	1.67365e-58	1.27281e-54
ENSG00000176884	ENSG00000114737.14	-0.565607	1.67519e-58	1.27398e-54
ENSG00000176884	ENSG00000245694.7	-0.565318	1.97155e-58	1.49937e-54
ENSG00000168539	ENSG00000187474.4	-0.565095	2.23455e-58	1.69938e-54
ENSG00000168539	ENSG00000162645.11	-0.565094	2.23549e-58	1.70009e-54
ENSG00000176884	ENSG00000203747.8	-0.564584	2.97819e-58	2.26492e-54
ENSG00000176884	ENSG00000144843.10	-0.563563	5.27595e-58	4.01236e-54
ENSG00000176884	ENSG00000108846.14	-0.563435	5.66829e-58	4.31073e-54
ENSG00000176884	ENSG00000164294.12	-0.563229	6.35894e-58	4.83597e-54
ENSG00000168539	ENSG00000187498.13	-0.563045	7.04524e-58	5.35791e-54
ENSG00000168539	ENSG00000242574.7	-0.562243	1.10211e-57	8.38153e-54
ENSG00000176884	ENSG00000205542.9	-0.562091	1.19939e-57	9.12133e-54
ENSG00000176884	ENSG00000106066.12	-0.562032	1.23892e-57	9.42199e-54
ENSG00000168539	ENSG00000204257.13	-0.561822	1.3929e-57	1.0593e-53
ENSG00000168539	ENSG00000147065.15	-0.561471	1.69294e-57	1.28748e-53
ENSG00000168539	ENSG00000114737.14	-0.561201	1.96593e-57	1.49509e-53
ENSG00000168539	ENSG00000168679.16	-0.561198	1.96987e-57	1.49808e-53
ENSG00000168539	ENSG00000280206.1	-0.56109	2.0912e-57	1.59036e-53
ENSG00000176884	ENSG00000134242.14	-0.56041	3.04729e-57	2.31746e-53
ENSG00000168539	ENSG00000166483.9	-0.560312	3.21757e-57	2.44696e-53
ENSG00000176884	ENSG00000130201.6	-0.560094	3.62995e-57	2.76058e-53
ENSG00000168539	ENSG00000203747.8	-0.560091	3.63429e-57	2.76388e-53
ENSG00000176884	ENSG00000118640.9	-0.559725	4.45002e-57	3.38424e-53
ENSG00000176884	ENSG00000171227.6	-0.559703	4.50386e-57	3.42518e-53
ENSG00000168539	ENSG00000144843.10	-0.559634	4.6778e-57	3.55746e-53
ENSG00000168539	ENSG00000137767.12	-0.559583	4.81195e-57	3.65949e-53
ENSG00000168539	ENSG00000154451.13	-0.559524	4.97078e-57	3.78028e-53
ENSG00000168539	ENSG00000163131.9	-0.559487	5.07363e-57	3.85849e-53
ENSG00000176884	ENSG00000187474.4	-0.559287	5.66436e-57	4.30775e-53
ENSG00000176884	ENSG00000124731.11	-0.559126	6.19113e-57	4.70836e-53
ENSG00000176884	ENSG00000105835.10	-0.559028	6.5358e-57	4.97047e-53
ENSG00000176884	ENSG00000138080.12	-0.558752	7.60769e-57	5.78565e-53
ENSG00000176884	ENSG00000128394.15	-0.558226	1.0154e-56	7.72214e-53
ENSG00000168539	ENSG00000154589.5	-0.558143	1.06302e-56	8.08424e-53
ENSG00000168539	ENSG00000162493.15	-0.558092	1.09329e-56	8.31449e-53
ENSG00000168539	ENSG00000216490.3	-0.557916	1.20408e-56	9.15706e-53
ENSG00000176884	ENSG00000138180.14	-0.557745	1.32253e-56	1.00578e-52
ENSG00000168539	ENSG00000152213.3	-0.557431	1.57028e-56	1.1942e-52
ENSG00000176884	ENSG00000162777.15	-0.557239	1.74518e-56	1.32721e-52
ENSG00000176884	ENSG00000204257.13	-0.556998	1.99069e-56	1.51392e-52
ENSG00000168539	ENSG00000116774.10	-0.556674	2.37652e-56	1.80735e-52
ENSG00000168539	ENSG00000141526.13	-0.556224	3.03762e-56	2.31011e-52
ENSG00000176884	ENSG00000141526.13	-0.556214	3.05535e-56	2.32359e-52
ENSG00000176884	ENSG00000025708.11	-0.556156	3.15266e-56	2.3976e-52
ENSG00000168539	ENSG00000128340.13	-0.555648	4.15772e-56	3.16195e-52
ENSG00000176884	ENSG00000128340.13	-0.55547	4.58175e-56	3.48442e-52
ENSG00000176884	ENSG00000196154.10	-0.555435	4.67021e-56	3.55169e-52
ENSG00000168539	ENSG00000260027.4	-0.555079	5.66622e-56	4.30916e-52
ENSG00000168539	ENSG00000261295.1	-0.555077	5.67301e-56	4.31432e-52
ENSG00000168539	ENSG00000176014.11	-0.55504	5.78668e-56	4.40077e-52
ENSG00000168539	ENSG00000245694.7	-0.554892	6.27282e-56	4.77048e-52
ENSG00000168539	ENSG00000101608.11	-0.554664	7.09738e-56	5.39756e-52
ENSG00000168539	ENSG00000105991.7	-0.554639	7.19491e-56	5.47173e-52
ENSG00000168539	ENSG00000161638.9	-0.554624	7.25529e-56	5.51765e-52
ENSG00000176884	ENSG00000250474.1	-0.554445	7.99439e-56	6.07973e-52
ENSG00000176884	ENSG00000110079.15	-0.554346	8.43527e-56	6.41502e-52
ENSG00000168539	ENSG00000134242.14	-0.554298	8.65377e-56	6.58119e-52
ENSG00000168539	ENSG00000026508.15	-0.554193	9.16402e-56	6.96924e-52
ENSG00000176884	ENSG00000242574.7	-0.554157	9.34142e-56	7.10415e-52
ENSG00000176884	ENSG00000138792.8	-0.55405	9.89875e-56	7.528e-52
ENSG00000168539	ENSG00000025708.11	-0.554016	1.00823e-55	7.66756e-52
ENSG00000176884	ENSG00000115414.17	-0.553911	1.06719e-55	8.11594e-52
ENSG00000168539	ENSG00000162777.15	-0.553901	1.07295e-55	8.15975e-52
ENSG00000168539	ENSG00000171227.6	-0.553753	1.16282e-55	8.84324e-52
ENSG00000176884	ENSG00000216490.3	-0.553463	1.36005e-55	1.03432e-51
ENSG00000176884	ENSG00000158710.13	-0.553364	1.43485e-55	1.09121e-51
ENSG00000168539	ENSG00000254545.1	-0.553055	1.69498e-55	1.28903e-51
ENSG00000168539	ENSG00000134668.11	-0.552614	2.15003e-55	1.6351e-51
ENSG00000176884	ENSG00000266970.1	-0.552437	2.3657e-55	1.79911e-51
ENSG00000176884	ENSG00000129450.7	-0.55238	2.43885e-55	1.85475e-51
ENSG00000168539	ENSG00000167208.13	-0.551854	3.23756e-55	2.46217e-51
ENSG00000176884	ENSG00000142694.6	-0.551651	3.60941e-55	2.74496e-51
ENSG00000176884	ENSG00000125810.9	-0.551625	3.65993e-55	2.78338e-51
ENSG00000168539	ENSG00000069399.11	-0.551547	3.81785e-55	2.90348e-51
ENSG00000176884	ENSG00000011422.10	-0.551381	4.1725e-55	3.17319e-51
ENSG00000176884	ENSG00000026508.15	-0.551151	4.71937e-55	3.58908e-51
ENSG00000168539	ENSG00000164294.12	-0.550968	5.20797e-55	3.96066e-51
ENSG00000176884	ENSG00000249001.4	-0.55058	6.41011e-55	4.87489e-51
ENSG00000176884	ENSG00000069399.11	-0.550453	6.85996e-55	5.217e-51
ENSG00000176884	ENSG00000162645.11	-0.550127	8.16596e-55	6.21021e-51
ENSG00000168539	ENSG00000175489.9	-0.550067	8.43333e-55	6.41355e-51
ENSG00000168539	ENSG00000163879.10	-0.55003	8.5992e-55	6.53969e-51
ENSG00000168539	ENSG00000011600.10	-0.549798	9.73336e-55	7.40222e-51
ENSG00000168539	ENSG00000254416.4	-0.549795	9.74917e-55	7.41424e-51
ENSG00000176884	ENSG00000168938.5	-0.549716	1.01672e-54	7.73215e-51
ENSG00000176884	ENSG00000197646.7	-0.549598	1.08298e-54	8.23609e-51
ENSG00000176884	ENSG00000197956.8	-0.549463	1.16418e-54	8.85355e-51
ENSG00000168539	ENSG00000090530.8	-0.54884	1.6221e-54	1.23361e-50
ENSG00000176884	ENSG00000168679.16	-0.548401	2.04825e-54	1.5577e-50
ENSG00000168539	ENSG00000128394.15	-0.548294	2.16799e-54	1.64875e-50
ENSG00000176884	ENSG00000254416.4	-0.548113	2.38644e-54	1.81489e-50
ENSG00000168539	ENSG00000115919.13	-0.547919	2.64448e-54	2.01113e-50
ENSG00000176884	ENSG00000176907.4	-0.546743	4.92936e-54	3.74878e-50
ENSG00000168539	ENSG00000205542.9	-0.546723	4.98093e-54	3.788e-50
ENSG00000176884	ENSG00000100292.15	-0.546551	5.4549e-54	4.14845e-50
ENSG00000176884	ENSG00000102007.9	-0.546407	5.88595e-54	4.47626e-50
ENSG00000176884	ENSG00000164920.8	-0.54624	6.4291e-54	4.88933e-50
ENSG00000168539	ENSG00000173372.15	-0.546082	6.98658e-54	5.3133e-50
ENSG00000168539	ENSG00000124731.11	-0.545934	7.55052e-54	5.74217e-50
ENSG00000176884	ENSG00000235750.8	-0.545852	7.88756e-54	5.99849e-50
ENSG00000176884	ENSG00000163131.9	-0.545622	8.90103e-54	6.76923e-50
ENSG00000168539	ENSG00000180061.8	-0.545597	9.01999e-54	6.8597e-50
ENSG00000176884	ENSG00000183742.11	-0.545356	1.02365e-53	7.78487e-50
ENSG00000176884	ENSG00000172380.5	-0.545346	1.02903e-53	7.8258e-50
ENSG00000176884	ENSG00000175538.9	-0.545228	1.09482e-53	8.32608e-50
ENSG00000176884	ENSG00000005059.14	-0.545222	1.09847e-53	8.3539e-50
ENSG00000168539	ENSG00000233038.4	-0.545014	1.22545e-53	9.31958e-50
ENSG00000176884	ENSG00000204516.8	-0.544542	1.56967e-53	1.19374e-49
ENSG00000168539	ENSG00000146094.12	-0.544471	1.62939e-53	1.23915e-49
ENSG00000176884	ENSG00000120708.15	-0.544335	1.74913e-53	1.33021e-49
ENSG00000168539	ENSG00000105835.10	-0.544237	1.84146e-53	1.40043e-49
ENSG00000168539	ENSG00000169385.2	-0.544161	1.91682e-53	1.45774e-49
ENSG00000168539	ENSG00000011422.10	-0.544015	2.06856e-53	1.57314e-49
ENSG00000168539	ENSG00000196154.10	-0.543918	2.1764e-53	1.65515e-49
ENSG00000176884	ENSG00000149418.9	-0.543885	2.21443e-53	1.68407e-49
ENSG00000176884	ENSG00000234883.3	-0.543834	2.2745e-53	1.72976e-49
ENSG00000168539	ENSG00000129226.12	-0.543717	2.4183e-53	1.83912e-49
ENSG00000168539	ENSG00000138080.12	-0.543699	2.44016e-53	1.85574e-49
ENSG00000168539	ENSG00000108846.14	-0.543239	3.10291e-53	2.35976e-49
ENSG00000176884	ENSG00000233038.4	-0.542972	3.56724e-53	2.71288e-49
ENSG00000176884	ENSG00000175857.7	-0.542931	3.64524e-53	2.7722e-49
ENSG00000168539	ENSG00000134871.16	-0.542789	3.92386e-53	2.9841e-49
ENSG00000176884	ENSG00000113083.11	-0.54234	4.9575e-53	3.77018e-49
ENSG00000176884	ENSG00000150961.13	-0.542133	5.52128e-53	4.19893e-49
ENSG00000176884	ENSG00000128342.4	-0.541954	6.06234e-53	4.61041e-49
ENSG00000176884	ENSG00000197249.11	-0.541781	6.6313e-53	5.0431e-49
ENSG00000176884	ENSG00000170006.10	-0.54175	6.73843e-53	5.12458e-49
ENSG00000168539	ENSG00000152952.10	-0.541646	7.11234e-53	5.40893e-49
ENSG00000176884	ENSG00000168542.11	-0.541628	7.17937e-53	5.45991e-49
ENSG00000168539	ENSG00000115107.18	-0.541466	7.81135e-53	5.94053e-49
ENSG00000176884	ENSG00000041982.13	-0.541382	8.15611e-53	6.20272e-49
ENSG00000168539	ENSG00000140839.10	-0.540801	1.10223e-52	8.38248e-49
ENSG00000176884	ENSG00000072694.17	-0.540772	1.11926e-52	8.51199e-49
ENSG00000168539	ENSG00000134531.8	-0.540724	1.14732e-52	8.72535e-49
ENSG00000168539	ENSG00000164430.14	-0.540634	1.20196e-52	9.14091e-49
ENSG00000176884	ENSG00000136542.7	-0.540624	1.20831e-52	9.18921e-49
ENSG00000176884	ENSG00000100336.16	-0.540547	1.25743e-52	9.56274e-49
ENSG00000176884	ENSG00000244682.6	-0.540538	1.26312e-52	9.60604e-49
ENSG00000168539	ENSG00000100292.15	-0.540072	1.60724e-52	1.2223e-48
ENSG00000168539	ENSG00000130201.6	-0.539809	1.84101e-52	1.40009e-48
ENSG00000168539	ENSG00000159189.10	-0.539779	1.86974e-52	1.42194e-48
ENSG00000168539	ENSG00000018408.13	-0.539659	1.9889e-52	1.51256e-48
ENSG00000176884	ENSG00000130513.6	-0.53963	2.01904e-52	1.53548e-48
ENSG00000176884	ENSG00000105011.7	-0.539307	2.38479e-52	1.81363e-48
ENSG00000176884	ENSG00000173372.15	-0.539062	2.70525e-52	2.05735e-48
ENSG00000176884	ENSG00000115107.18	-0.538991	2.80674e-52	2.13453e-48
ENSG00000168539	ENSG00000197249.11	-0.538827	3.05335e-52	2.32207e-48
ENSG00000176884	ENSG00000237181.1	-0.538718	3.22985e-52	2.4563e-48
ENSG00000168539	ENSG00000234883.3	-0.538666	3.31701e-52	2.52259e-48
ENSG00000176884	ENSG00000166741.6	-0.538473	3.66197e-52	2.78493e-48
ENSG00000176884	ENSG00000106004.4	-0.538158	4.3056e-52	3.27441e-48
ENSG00000176884	ENSG00000086991.11	-0.538147	4.32915e-52	3.29232e-48
ENSG00000168539	ENSG00000113083.11	-0.538062	4.52257e-52	3.43941e-48
ENSG00000176884	ENSG00000113532.11	-0.53797	4.74078e-52	3.60536e-48
ENSG00000176884	ENSG00000154451.13	-0.537842	5.06312e-52	3.8505e-48
ENSG00000176884	ENSG00000121966.6	-0.53772	5.38943e-52	4.09866e-48
ENSG00000176884	ENSG00000275713.1	-0.537524	5.96015e-52	4.5327e-48
ENSG00000176884	ENSG00000169385.2	-0.537359	6.4844e-52	4.93138e-48
ENSG00000168539	ENSG00000244682.6	-0.537355	6.49851e-52	4.94212e-48
ENSG00000176884	ENSG00000136231.12	-0.537179	7.10838e-52	5.40592e-48
ENSG00000168539	ENSG00000204516.8	-0.537164	7.1635e-52	5.44784e-48
ENSG00000168539	ENSG00000177575.11	-0.537043	7.62332e-52	5.79754e-48
ENSG00000168539	ENSG00000173369.14	-0.536973	7.89943e-52	6.00751e-48
ENSG00000176884	ENSG00000137757.9	-0.536933	8.06147e-52	6.13074e-48
ENSG00000176884	ENSG00000256235.1	-0.536912	8.14957e-52	6.19775e-48
ENSG00000176884	ENSG00000115919.13	-0.536755	8.83106e-52	6.71602e-48
ENSG00000168539	ENSG00000250474.1	-0.536732	8.93674e-52	6.79639e-48
ENSG00000176884	ENSG00000177575.11	-0.536562	9.74644e-52	7.41217e-48
ENSG00000168539	ENSG00000175538.9	-0.53629	1.11981e-51	8.51616e-48
ENSG00000168539	ENSG00000137757.9	-0.536289	1.11984e-51	8.51638e-48
ENSG00000176884	ENSG00000173369.14	-0.536202	1.1711e-51	8.90621e-48
ENSG00000176884	ENSG00000140839.10	-0.535955	1.32828e-51	1.01016e-47
ENSG00000176884	ENSG00000146094.12	-0.535799	1.43762e-51	1.09331e-47
ENSG00000168539	ENSG00000041982.13	-0.535783	1.44958e-51	1.10241e-47
ENSG00000176884	ENSG00000011600.10	-0.535667	1.53757e-51	1.16932e-47
ENSG00000168539	ENSG00000158104.10	-0.535496	1.6778e-51	1.27597e-47
ENSG00000168539	ENSG00000174125.6	-0.535253	1.89787e-51	1.44333e-47
ENSG00000168539	ENSG00000197405.6	-0.535167	1.9831e-51	1.50815e-47
ENSG00000176884	ENSG00000175489.9	-0.535046	2.10867e-51	1.60364e-47
ENSG00000168539	ENSG00000170458.12	-0.535009	2.14907e-51	1.63437e-47
ENSG00000168539	ENSG00000121966.6	-0.534823	2.36192e-51	1.79624e-47
ENSG00000176884	ENSG00000177706.8	-0.534801	2.38828e-51	1.81629e-47
ENSG00000168539	ENSG00000170006.10	-0.534692	2.52306e-51	1.91879e-47
ENSG00000176884	ENSG00000164430.14	-0.534199	3.24069e-51	2.46454e-47
ENSG00000168539	ENSG00000229124.5	-0.534084	3.43343e-51	2.61113e-47
ENSG00000176884	ENSG00000142945.11	-0.534014	3.55799e-51	2.70585e-47
ENSG00000176884	ENSG00000121621.6	-0.533992	3.59858e-51	2.73672e-47
ENSG00000176884	ENSG00000134531.8	-0.533867	3.83358e-51	2.91544e-47
ENSG00000176884	ENSG00000163545.7	-0.533761	4.04364e-51	3.07519e-47
ENSG00000168539	ENSG00000131042.12	-0.533702	4.1671e-51	3.16908e-47
ENSG00000176884	ENSG00000152952.10	-0.533668	4.23801e-51	3.22301e-47
ENSG00000168539	ENSG00000266970.1	-0.533444	4.74778e-51	3.61068e-47
ENSG00000168539	ENSG00000176907.4	-0.532974	6.01894e-51	4.57741e-47
ENSG00000168539	ENSG00000249001.4	-0.532955	6.07447e-51	4.61963e-47
ENSG00000176884	ENSG00000152213.3	-0.53294	6.12285e-51	4.65643e-47
ENSG00000176884	ENSG00000184661.12	-0.532904	6.23307e-51	4.74025e-47
ENSG00000168539	ENSG00000125810.9	-0.532486	7.69359e-51	5.85097e-47
ENSG00000168539	ENSG00000213694.3	-0.53237	8.15894e-51	6.20487e-47
ENSG00000168539	ENSG00000163545.7	-0.532312	8.40058e-51	6.38864e-47
ENSG00000168539	ENSG00000197747.7	-0.532155	9.0878e-51	6.91127e-47
ENSG00000176884	ENSG00000204287.12	-0.532114	9.27796e-51	7.05589e-47
ENSG00000176884	ENSG00000159189.10	-0.531938	1.01371e-50	7.70929e-47
ENSG00000168539	ENSG00000142694.6	-0.531697	1.14455e-50	8.70432e-47
ENSG00000176884	ENSG00000170891.9	-0.531677	1.15558e-50	8.78815e-47
ENSG00000168539	ENSG00000143891.15	-0.53166	1.16582e-50	8.86606e-47
ENSG00000176884	ENSG00000146376.9	-0.531631	1.18267e-50	8.99419e-47
ENSG00000168539	ENSG00000135437.8	-0.531533	1.24251e-50	9.44931e-47
ENSG00000168539	ENSG00000115414.17	-0.531422	1.31365e-50	9.99028e-47
ENSG00000168539	ENSG00000167613.14	-0.531312	1.38808e-50	1.05563e-46
ENSG00000176884	ENSG00000074219.12	-0.531192	1.47444e-50	1.12131e-46
ENSG00000176884	ENSG00000170439.6	-0.531144	1.51004e-50	1.14839e-46
ENSG00000176884	ENSG00000117091.8	-0.530831	1.76616e-50	1.34317e-46
ENSG00000176884	ENSG00000158714.9	-0.530752	1.83792e-50	1.39773e-46
ENSG00000176884	ENSG00000258227.5	-0.530681	1.90417e-50	1.44812e-46
ENSG00000168539	ENSG00000146376.9	-0.530654	1.93067e-50	1.46827e-46
ENSG00000168539	ENSG00000113532.11	-0.530529	2.05515e-50	1.56294e-46
ENSG00000168539	ENSG00000102007.9	-0.530359	2.23717e-50	1.70137e-46
ENSG00000176884	ENSG00000136286.13	-0.530144	2.49059e-50	1.89409e-46
ENSG00000176884	ENSG00000224861.1	-0.530112	2.53072e-50	1.92461e-46
ENSG00000168539	ENSG00000091879.12	-0.530064	2.5922e-50	1.97137e-46
ENSG00000168539	ENSG00000204287.12	-0.530019	2.65117e-50	2.01622e-46
ENSG00000168539	ENSG00000110057.6	-0.529663	3.16663e-50	2.40822e-46
ENSG00000168539	ENSG00000074219.12	-0.52964	3.20296e-50	2.43585e-46
ENSG00000176884	ENSG00000129226.12	-0.529637	3.20865e-50	2.44018e-46
ENSG00000176884	ENSG00000115163.13	-0.529514	3.41121e-50	2.59422e-46
ENSG00000176884	ENSG00000168779.18	-0.52905	4.29903e-50	3.26941e-46
ENSG00000176884	ENSG00000106333.11	-0.528893	4.6473e-50	3.53427e-46
ENSG00000168539	ENSG00000018280.15	-0.528786	4.9008e-50	3.72706e-46
ENSG00000176884	ENSG00000177096.7	-0.528547	5.52046e-50	4.19831e-46
ENSG00000176884	ENSG00000259207.6	-0.52812	6.82431e-50	5.18989e-46
ENSG00000168539	ENSG00000183742.11	-0.528081	6.95747e-50	5.29115e-46
ENSG00000168539	ENSG00000172380.5	-0.528036	7.11319e-50	5.40958e-46
ENSG00000168539	ENSG00000072694.17	-0.527985	7.29844e-50	5.55046e-46
ENSG00000168539	ENSG00000110852.4	-0.527552	9.04454e-50	6.87837e-46
ENSG00000176884	ENSG00000213694.3	-0.527545	9.0757e-50	6.90207e-46
ENSG00000176884	ENSG00000018408.13	-0.527329	1.0099e-49	7.68032e-46
ENSG00000168539	ENSG00000162511.7	-0.527235	1.05828e-49	8.04819e-46
ENSG00000176884	ENSG00000085840.11	-0.527048	1.16059e-49	8.82625e-46
ENSG00000176884	ENSG00000167208.13	-0.526865	1.27038e-49	9.66127e-46
ENSG00000168539	ENSG00000106823.11	-0.526411	1.59008e-49	1.20926e-45
ENSG00000168539	ENSG00000122122.9	-0.526392	1.60441e-49	1.22016e-45
ENSG00000168539	ENSG00000174837.13	-0.526011	1.93596e-49	1.47229e-45
ENSG00000168539	ENSG00000235750.8	-0.525907	2.03826e-49	1.5501e-45
ENSG00000176884	ENSG00000180061.8	-0.52579	2.15928e-49	1.64213e-45
ENSG00000176884	ENSG00000170961.6	-0.525398	2.6184e-49	1.99129e-45
ENSG00000176884	ENSG00000123080.9	-0.525307	2.73784e-49	2.08213e-45
ENSG00000168539	ENSG00000019582.13	-0.525219	2.85929e-49	2.17449e-45
ENSG00000176884	ENSG00000185839.3	-0.52513	2.98769e-49	2.27214e-45
ENSG00000176884	ENSG00000110852.4	-0.52489	3.36001e-49	2.55528e-45
ENSG00000168539	ENSG00000132965.8	-0.524774	3.55682e-49	2.70496e-45
ENSG00000176884	ENSG00000145623.11	-0.524712	3.66657e-49	2.78843e-45
ENSG00000168539	ENSG00000120708.15	-0.524526	4.0186e-49	3.05615e-45
ENSG00000176884	ENSG00000117399.12	-0.52436	4.35912e-49	3.31511e-45
ENSG00000176884	ENSG00000197903.7	-0.524331	4.42018e-49	3.36154e-45
ENSG00000168539	ENSG00000169413.2	-0.5241	4.95096e-49	3.7652e-45
ENSG00000176884	ENSG00000273983.1	-0.524083	4.9915e-49	3.79604e-45
ENSG00000168539	ENSG00000166741.6	-0.524004	5.18951e-49	3.94663e-45
ENSG00000176884	ENSG00000003436.13	-0.523929	5.38271e-49	4.09355e-45
ENSG00000168539	ENSG00000168421.11	-0.523871	5.53837e-49	4.21193e-45
ENSG00000176884	ENSG00000174837.13	-0.523628	6.23497e-49	4.74169e-45
ENSG00000168539	ENSG00000197956.8	-0.523603	6.31358e-49	4.80148e-45
ENSG00000176884	ENSG00000108821.12	-0.5236	6.32294e-49	4.8086e-45
ENSG00000176884	ENSG00000197576.12	-0.523518	6.58046e-49	5.00444e-45
ENSG00000176884	ENSG00000134690.9	-0.523435	6.8521e-49	5.21102e-45
ENSG00000168539	ENSG00000120093.10	-0.523287	7.36539e-49	5.60138e-45
ENSG00000168539	ENSG00000158710.13	-0.523166	7.81496e-49	5.94328e-45
ENSG00000176884	ENSG00000115457.8	-0.522917	8.82607e-49	6.71222e-45
ENSG00000168539	ENSG00000104518.9	-0.522845	9.13775e-49	6.94926e-45
ENSG00000168539	ENSG00000117151.11	-0.522768	9.48725e-49	7.21506e-45
ENSG00000176884	ENSG00000156265.14	-0.522658	1.00122e-48	7.61426e-45
ENSG00000176884	ENSG00000019582.13	-0.522643	1.00842e-48	7.66901e-45
ENSG00000176884	ENSG00000158104.10	-0.522399	1.13582e-48	8.63794e-45
ENSG00000176884	ENSG00000237499.5	-0.522299	1.1927e-48	9.07048e-45
ENSG00000176884	ENSG00000175544.12	-0.522119	1.30145e-48	9.89753e-45
ENSG00000176884	ENSG00000187653.11	-0.522112	1.30611e-48	9.93296e-45
ENSG00000176884	ENSG00000164879.6	-0.521896	1.45066e-48	1.10323e-44
ENSG00000176884	ENSG00000198885.8	-0.521659	1.62804e-48	1.23812e-44
ENSG00000168539	ENSG00000243811.6	-0.521651	1.63428e-48	1.24287e-44
ENSG00000176884	ENSG00000253552.6	-0.521593	1.68061e-48	1.2781e-44
ENSG00000176884	ENSG00000139354.9	-0.521517	1.74399e-48	1.32631e-44
ENSG00000168539	ENSG00000136286.13	-0.521471	1.7829e-48	1.35589e-44
ENSG00000176884	ENSG00000105997.21	-0.521364	1.87825e-48	1.42841e-44
ENSG00000168539	ENSG00000128342.4	-0.521291	1.94644e-48	1.48027e-44
ENSG00000168539	ENSG00000228649.7	-0.520831	2.43178e-48	1.84937e-44
ENSG00000168539	ENSG00000170891.9	-0.52081	2.45714e-48	1.86866e-44
ENSG00000176884	ENSG00000223551.1	-0.520676	2.62132e-48	1.99351e-44
ENSG00000176884	ENSG00000100558.7	-0.52067	2.62908e-48	1.99942e-44
ENSG00000168539	ENSG00000145623.11	-0.520619	2.69469e-48	2.04931e-44
ENSG00000168539	ENSG00000005059.14	-0.520499	2.8559e-48	2.17191e-44
ENSG00000176884	ENSG00000018280.15	-0.520494	2.86312e-48	2.1774e-44
ENSG00000168539	ENSG00000160255.15	-0.520262	3.20304e-48	2.43592e-44
ENSG00000176884	ENSG00000132965.8	-0.520099	3.46628e-48	2.63611e-44
ENSG00000168539	ENSG00000172197.10	-0.520047	3.5531e-48	2.70214e-44
ENSG00000176884	ENSG00000134460.14	-0.519952	3.72054e-48	2.82947e-44
ENSG00000168539	ENSG00000256235.1	-0.519654	4.29666e-48	3.26761e-44
ENSG00000176884	ENSG00000148848.13	-0.519605	4.39979e-48	3.34604e-44
ENSG00000176884	ENSG00000225434.2	-0.519404	4.84557e-48	3.68505e-44
ENSG00000168539	ENSG00000168938.5	-0.519301	5.0921e-48	3.87254e-44
ENSG00000176884	ENSG00000090530.8	-0.51919	5.37356e-48	4.08659e-44
ENSG00000176884	ENSG00000145386.8	-0.519089	5.64083e-48	4.28985e-44
ENSG00000176884	ENSG00000229124.5	-0.519033	5.79511e-48	4.40718e-44
ENSG00000168539	ENSG00000177706.8	-0.519006	5.87204e-48	4.46569e-44
ENSG00000176884	ENSG00000064886.12	-0.518923	6.10897e-48	4.64587e-44
ENSG00000176884	ENSG00000183072.9	-0.518717	6.74772e-48	5.13164e-44
ENSG00000176884	ENSG00000160446.17	-0.518677	6.87924e-48	5.23166e-44
ENSG00000176884	ENSG00000170458.12	-0.518374	7.9575e-48	6.05168e-44
ENSG00000168539	ENSG00000164920.8	-0.518214	8.58998e-48	6.53268e-44
ENSG00000176884	ENSG00000090382.5	-0.518154	8.84441e-48	6.72617e-44
ENSG00000176884	ENSG00000243811.6	-0.518001	9.51585e-48	7.2368e-44
ENSG00000168539	ENSG00000138792.8	-0.517994	9.54807e-48	7.26131e-44
ENSG00000176884	ENSG00000123892.10	-0.517698	1.10033e-47	8.36797e-44
ENSG00000168539	ENSG00000087077.10	-0.517645	1.1285e-47	8.58228e-44
ENSG00000176884	ENSG00000168421.11	-0.517644	1.12934e-47	8.5886e-44
ENSG00000168539	ENSG00000138180.14	-0.517595	1.15631e-47	8.79377e-44
ENSG00000176884	ENSG00000198353.7	-0.517526	1.19523e-47	9.08972e-44
ENSG00000176884	ENSG00000188015.8	-0.517297	1.33358e-47	1.01419e-43
ENSG00000176884	ENSG00000163879.10	-0.5172	1.39658e-47	1.0621e-43
ENSG00000176884	ENSG00000196126.9	-0.51715	1.43094e-47	1.08823e-43
ENSG00000176884	ENSG00000251593.1	-0.516764	1.72091e-47	1.30875e-43
ENSG00000176884	ENSG00000233429.8	-0.516752	1.73035e-47	1.31593e-43
ENSG00000168539	ENSG00000130513.6	-0.51663	1.83426e-47	1.39495e-43
ENSG00000176884	ENSG00000235363.1	-0.516533	1.92096e-47	1.46089e-43
ENSG00000176884	ENSG00000102265.10	-0.516505	1.94746e-47	1.48105e-43
ENSG00000168539	ENSG00000258227.5	-0.516488	1.96345e-47	1.4932e-43
ENSG00000176884	ENSG00000233328.3	-0.516425	2.02301e-47	1.5385e-43
ENSG00000176884	ENSG00000197405.6	-0.516242	2.20719e-47	1.67857e-43
ENSG00000168539	ENSG00000149418.9	-0.516238	2.21177e-47	1.68205e-43
ENSG00000168539	ENSG00000197903.7	-0.516201	2.25069e-47	1.71165e-43
ENSG00000176884	ENSG00000227145.1	-0.51582	2.699e-47	2.05259e-43
ENSG00000168539	ENSG00000156265.14	-0.515687	2.87536e-47	2.18671e-43
ENSG00000176884	ENSG00000186074.17	-0.515617	2.97278e-47	2.2608e-43
ENSG00000168539	ENSG00000152763.15	-0.515557	3.06004e-47	2.32716e-43
ENSG00000176884	ENSG00000105974.10	-0.515552	3.06719e-47	2.3326e-43
ENSG00000168539	ENSG00000139572.3	-0.515544	3.07884e-47	2.34145e-43
ENSG00000176884	ENSG00000104951.14	-0.515413	3.27648e-47	2.49176e-43
ENSG00000168539	ENSG00000197520.9	-0.515304	3.45038e-47	2.62401e-43
ENSG00000176884	ENSG00000165140.8	-0.514934	4.11454e-47	3.12911e-43
ENSG00000176884	ENSG00000184106.7	-0.514519	5.01051e-47	3.81049e-43
ENSG00000176884	ENSG00000169245.5	-0.514467	5.1346e-47	3.90486e-43
ENSG00000168539	ENSG00000186074.17	-0.514281	5.60837e-47	4.26516e-43
ENSG00000168539	ENSG00000168542.11	-0.514277	5.61754e-47	4.27214e-43
ENSG00000176884	ENSG00000185607.5	-0.514107	6.09097e-47	4.63218e-43
ENSG00000168539	ENSG00000117091.8	-0.514024	6.33553e-47	4.81817e-43
ENSG00000176884	ENSG00000231389.6	-0.513957	6.53871e-47	4.97269e-43
ENSG00000176884	ENSG00000231313.2	-0.513831	6.94114e-47	5.27874e-43
ENSG00000176884	ENSG00000228649.7	-0.513809	7.0117e-47	5.3324e-43
ENSG00000176884	ENSG00000116791.12	-0.513804	7.02936e-47	5.34583e-43
ENSG00000176884	ENSG00000143891.15	-0.51369	7.41998e-47	5.64289e-43
ENSG00000168539	ENSG00000225434.2	-0.513398	8.51596e-47	6.47639e-43
ENSG00000176884	ENSG00000232368.1	-0.513304	8.90288e-47	6.77064e-43
ENSG00000176884	ENSG00000112984.10	-0.513227	9.23397e-47	7.02243e-43
ENSG00000168539	ENSG00000137462.6	-0.513138	9.62853e-47	7.3225e-43
ENSG00000176884	ENSG00000253250.2	-0.51302	1.01799e-46	7.74184e-43
ENSG00000176884	ENSG00000231789.2	-0.512847	1.10477e-46	8.40176e-43
ENSG00000168539	ENSG00000158714.9	-0.512795	1.13219e-46	8.61027e-43
ENSG00000168539	ENSG00000104951.14	-0.512741	1.16117e-46	8.83067e-43
ENSG00000168539	ENSG00000164879.6	-0.512703	1.18244e-46	8.99242e-43
ENSG00000176884	ENSG00000174125.6	-0.512334	1.40654e-46	1.06967e-42
ENSG00000168539	ENSG00000162745.9	-0.512224	1.48121e-46	1.12646e-42
ENSG00000176884	ENSG00000120093.10	-0.512076	1.58854e-46	1.20809e-42
ENSG00000176884	ENSG00000163814.6	-0.511872	1.74822e-46	1.32952e-42
ENSG00000176884	ENSG00000188765.7	-0.511345	2.23987e-46	1.70342e-42
ENSG00000176884	ENSG00000126787.11	-0.511284	2.30433e-46	1.75245e-42
ENSG00000176884	ENSG00000253293.4	-0.511276	2.31339e-46	1.75933e-42
ENSG00000176884	ENSG00000253676.1	-0.511051	2.57074e-46	1.95504e-42
ENSG00000168539	ENSG00000233429.8	-0.511033	2.59291e-46	1.97191e-42
ENSG00000168539	ENSG00000176597.10	-0.51093	2.71995e-46	2.06852e-42
ENSG00000176884	ENSG00000267045.1	-0.51076	2.94549e-46	2.24004e-42
ENSG00000176884	ENSG00000197747.7	-0.510704	3.02432e-46	2.29999e-42
ENSG00000168539	ENSG00000170961.6	-0.510395	3.4945e-46	2.65757e-42
ENSG00000168539	ENSG00000196126.9	-0.510328	3.60564e-46	2.74209e-42
ENSG00000176884	ENSG00000225131.2	-0.510322	3.61704e-46	2.75076e-42
ENSG00000176884	ENSG00000269378.1	-0.509929	4.3463e-46	3.30536e-42
ENSG00000176884	ENSG00000179750.14	-0.509923	4.35728e-46	3.31371e-42
ENSG00000176884	ENSG00000110057.6	-0.509741	4.74491e-46	3.6085e-42
ENSG00000176884	ENSG00000166920.9	-0.509477	5.36677e-46	4.08143e-42
ENSG00000176884	ENSG00000080986.11	-0.509271	5.90741e-46	4.49259e-42
ENSG00000168539	ENSG00000160446.17	-0.509244	5.98313e-46	4.55017e-42
ENSG00000176884	ENSG00000162511.7	-0.509083	6.44811e-46	4.90379e-42
ENSG00000176884	ENSG00000131042.12	-0.508691	7.73944e-46	5.88584e-42
ENSG00000168539	ENSG00000105383.13	-0.508593	8.10126e-46	6.16101e-42
ENSG00000168539	ENSG00000175544.12	-0.508545	8.28065e-46	6.29744e-42
ENSG00000176884	ENSG00000249014.2	-0.508417	8.7914e-46	6.68586e-42
ENSG00000176884	ENSG00000234664.1	-0.508375	8.96368e-46	6.81688e-42
ENSG00000168539	ENSG00000179583.16	-0.508234	9.56966e-46	7.27773e-42
ENSG00000168539	ENSG00000173917.10	-0.508195	9.74608e-46	7.41189e-42
ENSG00000176884	ENSG00000172322.12	-0.50817	9.86091e-46	7.49922e-42
ENSG00000168539	ENSG00000279713.1	-0.508094	1.02114e-45	7.76573e-42
ENSG00000176884	ENSG00000266835.4	-0.508086	1.02491e-45	7.79446e-42
ENSG00000176884	ENSG00000236876.3	-0.507915	1.10988e-45	8.44061e-42
ENSG00000176884	ENSG00000162745.9	-0.50764	1.26076e-45	9.58807e-42
ENSG00000168539	ENSG00000196209.11	-0.507467	1.36591e-45	1.03878e-41
ENSG00000176884	ENSG00000129173.11	-0.507401	1.40868e-45	1.0713e-41
ENSG00000168539	ENSG00000173200.11	-0.507398	1.41051e-45	1.07269e-41
ENSG00000168539	ENSG00000106333.11	-0.507379	1.42313e-45	1.08229e-41
ENSG00000168539	ENSG00000157240.3	-0.507208	1.5398e-45	1.17101e-41
ENSG00000168539	ENSG00000163814.6	-0.507161	1.57382e-45	1.19689e-41
ENSG00000168539	ENSG00000158517.12	-0.507161	1.5741e-45	1.1971e-41
ENSG00000176884	ENSG00000139178.9	-0.507051	1.6564e-45	1.2597e-41
ENSG00000176884	ENSG00000134802.16	-0.50703	1.67209e-45	1.27162e-41
ENSG00000168539	ENSG00000271984.1	-0.507005	1.69209e-45	1.28684e-41
ENSG00000176884	ENSG00000172197.10	-0.506939	1.74396e-45	1.32628e-41
ENSG00000176884	ENSG00000165071.13	-0.506921	1.75884e-45	1.3376e-41
ENSG00000176884	ENSG00000164692.16	-0.50686	1.80881e-45	1.3756e-41
ENSG00000168539	ENSG00000165140.8	-0.506841	1.82522e-45	1.38808e-41
ENSG00000176884	ENSG00000280721.1	-0.506813	1.84917e-45	1.40629e-41
ENSG00000176884	ENSG00000233834.5	-0.506647	1.99631e-45	1.51819e-41
ENSG00000176884	ENSG00000142227.9	-0.506412	2.22479e-45	1.69195e-41
ENSG00000176884	ENSG00000177363.4	-0.506329	2.31236e-45	1.75855e-41
ENSG00000168539	ENSG00000177096.7	-0.506297	2.34664e-45	1.78462e-41
ENSG00000168539	ENSG00000075884.11	-0.506296	2.34706e-45	1.78494e-41
ENSG00000168539	ENSG00000105967.14	-0.506153	2.50769e-45	1.90709e-41
ENSG00000176884	ENSG00000205403.11	-0.505931	2.77831e-45	2.11291e-41
ENSG00000168539	ENSG00000150961.13	-0.505819	2.92517e-45	2.22459e-41
ENSG00000168539	ENSG00000116791.12	-0.505817	2.92801e-45	2.22675e-41
ENSG00000176884	ENSG00000230330.1	-0.505752	3.01703e-45	2.29445e-41
ENSG00000168539	ENSG00000064886.12	-0.505286	3.73815e-45	2.84286e-41
ENSG00000168539	ENSG00000224861.1	-0.505267	3.77079e-45	2.86768e-41
ENSG00000168539	ENSG00000090382.5	-0.505076	4.11762e-45	3.13145e-41
ENSG00000176884	ENSG00000225217.1	-0.505074	4.12161e-45	3.13448e-41
ENSG00000168539	ENSG00000231389.6	-0.505009	4.24644e-45	3.22942e-41
ENSG00000168539	ENSG00000171812.9	-0.504964	4.33474e-45	3.29657e-41
ENSG00000176884	ENSG00000137869.12	-0.50483	4.60942e-45	3.50546e-41
ENSG00000168539	ENSG00000160791.13	-0.504814	4.64363e-45	3.53148e-41
ENSG00000176884	ENSG00000197520.9	-0.504749	4.78518e-45	3.63913e-41
ENSG00000176884	ENSG00000223865.9	-0.50474	4.80543e-45	3.65453e-41
ENSG00000176884	ENSG00000166278.13	-0.504731	4.82401e-45	3.66866e-41
ENSG00000168539	ENSG00000105011.7	-0.504555	5.22995e-45	3.97738e-41
ENSG00000168539	ENSG00000155659.13	-0.50453	5.29086e-45	4.0237e-41
ENSG00000176884	ENSG00000254369.5	-0.50452	5.31636e-45	4.04309e-41
ENSG00000168539	ENSG00000237499.5	-0.50411	6.41428e-45	4.87806e-41
ENSG00000168539	ENSG00000253250.2	-0.503957	6.88051e-45	5.23263e-41
ENSG00000168539	ENSG00000274565.1	-0.503759	7.53183e-45	5.72796e-41
ENSG00000168539	ENSG00000225217.1	-0.503636	7.96873e-45	6.06022e-41
ENSG00000176884	ENSG00000122122.9	-0.503515	8.42214e-45	6.40504e-41
ENSG00000168539	ENSG00000223551.1	-0.503284	9.36044e-45	7.11862e-41
ENSG00000168539	ENSG00000223865.9	-0.503218	9.64768e-45	7.33706e-41
ENSG00000176884	ENSG00000176842.13	-0.503096	1.01997e-44	7.7569e-41
ENSG00000176884	ENSG00000135437.8	-0.503053	1.04007e-44	7.90973e-41
ENSG00000176884	ENSG00000241081.1	-0.503027	1.05242e-44	8.00366e-41
ENSG00000168539	ENSG00000167850.3	-0.502948	1.0914e-44	8.30009e-41
ENSG00000168539	ENSG00000100336.16	-0.502937	1.09684e-44	8.34149e-41
ENSG00000176884	ENSG00000157456.6	-0.502894	1.11829e-44	8.50459e-41
ENSG00000176884	ENSG00000226608.3	-0.502696	1.22433e-44	9.31104e-41
ENSG00000168539	ENSG00000156127.6	-0.502654	1.24801e-44	9.49109e-41
ENSG00000168539	ENSG00000187037.7	-0.502602	1.27779e-44	9.71758e-41
ENSG00000168539	ENSG00000108821.12	-0.502573	1.295e-44	9.8485e-41
ENSG00000176884	ENSG00000108511.9	-0.502235	1.51064e-44	1.14884e-40
ENSG00000176884	ENSG00000147168.11	-0.502123	1.58954e-44	1.20884e-40
ENSG00000176884	ENSG00000117151.11	-0.502047	1.64526e-44	1.25122e-40
ENSG00000168539	ENSG00000136542.7	-0.501493	2.1162e-44	1.60937e-40
ENSG00000176884	ENSG00000204262.10	-0.501465	2.14344e-44	1.63009e-40
ENSG00000176884	ENSG00000174807.3	-0.501366	2.24213e-44	1.70514e-40
ENSG00000168539	ENSG00000147168.11	-0.501266	2.34679e-44	1.78474e-40
ENSG00000176884	ENSG00000188257.9	-0.501257	2.35629e-44	1.79196e-40
ENSG00000168539	ENSG00000085840.11	-0.501153	2.47008e-44	1.8785e-40
ENSG00000168539	ENSG00000237181.1	-0.50113	2.49579e-44	1.89805e-40
ENSG00000176884	ENSG00000167613.14	-0.501058	2.57842e-44	1.96089e-40
ENSG00000168539	ENSG00000108511.9	-0.501024	2.6183e-44	1.99122e-40
ENSG00000168539	ENSG00000177409.10	-0.501019	2.62483e-44	1.99618e-40
ENSG00000168539	ENSG00000214787.7	-0.500886	2.78785e-44	2.12016e-40
ENSG00000168539	ENSG00000139178.9	-0.500753	2.96043e-44	2.2514e-40
ENSG00000176884	ENSG00000230067.3	-0.500722	3.00352e-44	2.28418e-40
ENSG00000176884	ENSG00000213740.2	-0.500517	3.29476e-44	2.50567e-40
ENSG00000168539	ENSG00000127507.16	-0.5005	3.32101e-44	2.52563e-40
ENSG00000176884	ENSG00000104518.9	-0.500483	3.34682e-44	2.54525e-40
ENSG00000176884	ENSG00000156127.6	-0.500412	3.45489e-44	2.62745e-40
ENSG00000176884	ENSG00000275830.1	-0.500252	3.71421e-44	2.82466e-40
ENSG00000168539	ENSG00000095303.13	-0.500234	3.74569e-44	2.8486e-40
ENSG00000168539	ENSG00000227145.1	-0.499987	4.18775e-44	3.18478e-40
ENSG00000176884	ENSG00000213399.3	-0.499707	4.75336e-44	3.61493e-40
ENSG00000168539	ENSG00000166920.9	-0.499347	5.59044e-44	4.25153e-40
ENSG00000168539	ENSG00000177469.12	-0.498949	6.68957e-44	5.08742e-40
ENSG00000176884	ENSG00000127507.16	-0.498925	6.76113e-44	5.14184e-40
ENSG00000168539	ENSG00000086991.11	-0.49892	6.77747e-44	5.15427e-40
ENSG00000176884	ENSG00000169413.2	-0.49886	6.96425e-44	5.29631e-40
ENSG00000168539	ENSG00000242512.7	-0.498487	8.23596e-44	6.26345e-40
ENSG00000168539	ENSG00000170439.6	-0.498282	9.02881e-44	6.86641e-40
ENSG00000176884	ENSG00000227094.1	-0.498228	9.25277e-44	7.03673e-40
ENSG00000168539	ENSG00000134460.14	-0.498188	9.41924e-44	7.16333e-40
ENSG00000168539	ENSG00000106004.4	-0.498186	9.42943e-44	7.17108e-40
ENSG00000168539	ENSG00000185839.3	-0.498157	9.55203e-44	7.26432e-40
ENSG00000176884	ENSG00000173917.10	-0.498092	9.83279e-44	7.47784e-40
ENSG00000176884	ENSG00000128713.12	-0.498073	9.91801e-44	7.54265e-40
ENSG00000176884	ENSG00000163661.3	-0.498037	1.0083e-43	7.66812e-40
ENSG00000176884	ENSG00000271984.1	-0.497981	1.03397e-43	7.86332e-40
ENSG00000176884	ENSG00000253882.5	-0.497976	1.03604e-43	7.87909e-40
ENSG00000168539	ENSG00000168779.18	-0.497845	1.09907e-43	8.35841e-40
ENSG00000176884	ENSG00000042493.14	-0.497643	1.20302e-43	9.14898e-40
ENSG00000168539	ENSG00000172322.12	-0.497554	1.25204e-43	9.52175e-40
ENSG00000168539	ENSG00000184293.6	-0.497445	1.315e-43	1.00006e-39
ENSG00000176884	ENSG00000160255.15	-0.497211	1.45982e-43	1.1102e-39
ENSG00000176884	ENSG00000121594.10	-0.497117	1.52304e-43	1.15827e-39
ENSG00000168539	ENSG00000165178.9	-0.496993	1.60948e-43	1.22401e-39
ENSG00000176884	ENSG00000100196.9	-0.496964	1.63049e-43	1.23999e-39
ENSG00000168539	ENSG00000198885.8	-0.496901	1.67729e-43	1.27558e-39
ENSG00000176884	ENSG00000235655.3	-0.496867	1.70313e-43	1.29523e-39
ENSG00000168539	ENSG00000001036.12	-0.496817	1.74121e-43	1.32419e-39
ENSG00000176884	ENSG00000024526.15	-0.496696	1.83859e-43	1.39825e-39
ENSG00000176884	ENSG00000106006.6	-0.496627	1.89564e-43	1.44163e-39
ENSG00000176884	ENSG00000235508.3	-0.496547	1.96528e-43	1.4946e-39
ENSG00000168539	ENSG00000123892.10	-0.496473	2.0308e-43	1.54442e-39
ENSG00000176884	ENSG00000106823.11	-0.496252	2.24155e-43	1.7047e-39
ENSG00000168539	ENSG00000142945.11	-0.496198	2.29661e-43	1.74657e-39
ENSG00000168539	ENSG00000267045.1	-0.496194	2.30022e-43	1.74932e-39
ENSG00000168539	ENSG00000221869.4	-0.495988	2.52158e-43	1.91766e-39
ENSG00000176884	ENSG00000158517.12	-0.495687	2.88399e-43	2.19328e-39
ENSG00000168539	ENSG00000121594.10	-0.495669	2.90715e-43	2.21088e-39
ENSG00000176884	ENSG00000139572.3	-0.495623	2.96803e-43	2.25718e-39
ENSG00000168539	ENSG00000187653.11	-0.495513	3.11623e-43	2.3699e-39
ENSG00000168539	ENSG00000123080.9	-0.495491	3.14767e-43	2.39381e-39
ENSG00000168539	ENSG00000182742.5	-0.495087	3.76644e-43	2.86438e-39
ENSG00000168539	ENSG00000251593.1	-0.495053	3.82387e-43	2.90806e-39
ENSG00000168539	ENSG00000106952.6	-0.494787	4.30478e-43	3.27379e-39
ENSG00000176884	ENSG00000216866.5	-0.494644	4.58734e-43	3.48868e-39
ENSG00000168539	ENSG00000260850.1	-0.494602	4.67307e-43	3.55387e-39
ENSG00000168539	ENSG00000121621.6	-0.494529	4.82749e-43	3.67131e-39
ENSG00000176884	ENSG00000168899.4	-0.494453	4.99191e-43	3.79635e-39
ENSG00000168539	ENSG00000105974.10	-0.494271	5.41134e-43	4.11533e-39
ENSG00000176884	ENSG00000123342.14	-0.494265	5.42681e-43	4.12709e-39
ENSG00000168539	ENSG00000102174.8	-0.494257	5.44618e-43	4.14182e-39
ENSG00000168539	ENSG00000188015.8	-0.49425	5.46295e-43	4.15458e-39
ENSG00000176884	ENSG00000254332.1	-0.494227	5.51814e-43	4.19655e-39
ENSG00000168539	ENSG00000163661.3	-0.49402	6.04908e-43	4.60033e-39
ENSG00000168539	ENSG00000182487.11	-0.493845	6.53601e-43	4.97063e-39
ENSG00000176884	ENSG00000162458.11	-0.49363	7.19015e-43	5.46811e-39
ENSG00000176884	ENSG00000222047.7	-0.49356	7.41717e-43	5.64076e-39
ENSG00000176884	ENSG00000120833.12	-0.493557	7.42671e-43	5.64801e-39
ENSG00000168539	ENSG00000148848.13	-0.493214	8.64033e-43	6.57097e-39
ENSG00000176884	ENSG00000215895.4	-0.493139	8.93429e-43	6.79452e-39
ENSG00000176884	ENSG00000279713.1	-0.493124	8.99436e-43	6.84021e-39
ENSG00000176884	ENSG00000273812.1	-0.493082	9.16027e-43	6.96639e-39
ENSG00000176884	ENSG00000157240.3	-0.493035	9.35434e-43	7.11397e-39
ENSG00000176884	ENSG00000123473.14	-0.493032	9.36443e-43	7.12165e-39
ENSG00000176884	ENSG00000123427.14	-0.492947	9.72605e-43	7.39666e-39
ENSG00000168539	ENSG00000234147.1	-0.492937	9.76571e-43	7.42683e-39
ENSG00000168539	ENSG00000253552.6	-0.49288	1.00176e-42	7.61836e-39
ENSG00000168539	ENSG00000165168.7	-0.492718	1.07561e-42	8.18005e-39
ENSG00000168539	ENSG00000177045.7	-0.492662	1.10287e-42	8.38729e-39
ENSG00000176884	ENSG00000027869.10	-0.492427	1.22318e-42	9.30228e-39
ENSG00000176884	ENSG00000213539.4	-0.49238	1.24868e-42	9.4962e-39
ENSG00000176884	ENSG00000260850.1	-0.492289	1.29991e-42	9.88585e-39
ENSG00000176884	ENSG00000001036.12	-0.492267	1.31236e-42	9.98053e-39
ENSG00000168539	ENSG00000166278.13	-0.49223	1.33397e-42	1.01449e-38
ENSG00000168539	ENSG00000155530.2	-0.492051	1.44315e-42	1.09752e-38
ENSG00000176884	ENSG00000160791.13	-0.491978	1.49059e-42	1.13359e-38
ENSG00000168539	ENSG00000010704.17	-0.491962	1.50117e-42	1.14164e-38
ENSG00000176884	ENSG00000015413.8	-0.491754	1.64481e-42	1.25088e-38
ENSG00000168539	ENSG00000222047.7	-0.49149	1.84742e-42	1.40497e-38
ENSG00000168539	ENSG00000012211.11	-0.491423	1.90227e-42	1.44667e-38
ENSG00000176884	ENSG00000087077.10	-0.491214	2.08597e-42	1.58638e-38
ENSG00000168539	ENSG00000136634.5	-0.491159	2.13654e-42	1.62484e-38
ENSG00000168539	ENSG00000106483.10	-0.491148	2.1473e-42	1.63302e-38
ENSG00000176884	ENSG00000120318.14	-0.491126	2.16767e-42	1.64851e-38
ENSG00000168539	ENSG00000259207.6	-0.490824	2.47443e-42	1.8818e-38
ENSG00000168539	ENSG00000176842.13	-0.490802	2.49847e-42	1.90009e-38
ENSG00000176884	ENSG00000165304.6	-0.490792	2.50936e-42	1.90837e-38
ENSG00000168539	ENSG00000275713.1	-0.490644	2.67805e-42	2.03666e-38
ENSG00000168539	ENSG00000232368.1	-0.490627	2.69798e-42	2.05181e-38
ENSG00000168539	ENSG00000168899.4	-0.490561	2.77687e-42	2.11181e-38
ENSG00000168539	ENSG00000235363.1	-0.490351	3.04446e-42	2.31531e-38
ENSG00000176884	ENSG00000100985.7	-0.490091	3.41145e-42	2.59441e-38
ENSG00000176884	ENSG00000131203.11	-0.489836	3.81339e-42	2.90008e-38
ENSG00000176884	ENSG00000012211.11	-0.489553	4.31635e-42	3.28258e-38
ENSG00000168539	ENSG00000115165.8	-0.489477	4.46217e-42	3.39348e-38
ENSG00000168539	ENSG00000230148.7	-0.489393	4.62845e-42	3.51994e-38
ENSG00000176884	ENSG00000010704.17	-0.489354	4.70713e-42	3.57977e-38
ENSG00000168539	ENSG00000165071.13	-0.489093	5.27375e-42	4.01068e-38
ENSG00000176884	ENSG00000182742.5	-0.489043	5.39071e-42	4.09964e-38
ENSG00000168539	ENSG00000198353.7	-0.48899	5.51714e-42	4.19578e-38
ENSG00000168539	ENSG00000142227.9	-0.488729	6.1813e-42	4.70087e-38
ENSG00000168539	ENSG00000213740.2	-0.48871	6.23339e-42	4.74049e-38
ENSG00000168539	ENSG00000266835.4	-0.488653	6.38931e-42	4.85907e-38
ENSG00000168539	ENSG00000115163.13	-0.488644	6.41404e-42	4.87788e-38
ENSG00000176884	ENSG00000249565.2	-0.488634	6.44237e-42	4.89942e-38
ENSG00000176884	ENSG00000176597.10	-0.488592	6.55988e-42	4.98879e-38
ENSG00000176884	ENSG00000177409.10	-0.488514	6.7888e-42	5.16288e-38
ENSG00000168539	ENSG00000003436.13	-0.488392	7.15682e-42	5.44276e-38
ENSG00000168539	ENSG00000225131.2	-0.488373	7.21752e-42	5.48892e-38
ENSG00000176884	ENSG00000197905.7	-0.488252	7.60841e-42	5.78619e-38
ENSG00000168539	ENSG00000129173.11	-0.488161	7.91448e-42	6.01896e-38
ENSG00000168539	ENSG00000258818.3	-0.48815	7.95066e-42	6.04648e-38
ENSG00000168539	ENSG00000247774.5	-0.488136	8.00217e-42	6.08565e-38
ENSG00000176884	ENSG00000266928.1	-0.48813	8.02098e-42	6.09996e-38
ENSG00000168539	ENSG00000105997.21	-0.487972	8.59227e-42	6.53442e-38
ENSG00000176884	ENSG00000213763.4	-0.487916	8.80222e-42	6.69409e-38
ENSG00000176884	ENSG00000214787.7	-0.487725	9.56382e-42	7.27328e-38
ENSG00000176884	ENSG00000177469.12	-0.487609	1.00588e-41	7.64973e-38
ENSG00000176884	ENSG00000234147.1	-0.487471	1.06778e-41	8.12049e-38
ENSG00000176884	ENSG00000160013.7	-0.487398	1.10205e-41	8.38111e-38
ENSG00000176884	ENSG00000179583.16	-0.487278	1.16103e-41	8.82962e-38
ENSG00000176884	ENSG00000107438.7	-0.487248	1.17637e-41	8.94626e-38
ENSG00000168539	ENSG00000204577.10	-0.487164	1.21993e-41	9.27754e-38
ENSG00000168539	ENSG00000177363.4	-0.487101	1.25365e-41	9.53397e-38
ENSG00000176884	ENSG00000142173.13	-0.487091	1.25879e-41	9.57313e-38
ENSG00000176884	ENSG00000108950.10	-0.487042	1.28595e-41	9.77961e-38
ENSG00000168539	ENSG00000183072.9	-0.486623	1.5413e-41	1.17216e-37
ENSG00000176884	ENSG00000116717.10	-0.486494	1.62968e-41	1.23937e-37
ENSG00000176884	ENSG00000217027.1	-0.486479	1.64031e-41	1.24745e-37
ENSG00000168539	ENSG00000197576.12	-0.486464	1.65108e-41	1.25565e-37
ENSG00000168539	ENSG00000102265.10	-0.486442	1.66704e-41	1.26778e-37
ENSG00000176884	ENSG00000174343.5	-0.48644	1.66844e-41	1.26885e-37
ENSG00000176884	ENSG00000187037.7	-0.486402	1.69609e-41	1.28988e-37
ENSG00000176884	ENSG00000075884.11	-0.48629	1.78003e-41	1.35371e-37
ENSG00000168539	ENSG00000101160.12	-0.486229	1.82765e-41	1.38993e-37
ENSG00000176884	ENSG00000173110.7	-0.486191	1.85773e-41	1.4128e-37
ENSG00000168539	ENSG00000143382.12	-0.486191	1.85829e-41	1.41323e-37
ENSG00000176884	ENSG00000102174.8	-0.486072	1.95615e-41	1.48765e-37
ENSG00000176884	ENSG00000144481.15	-0.485903	2.10402e-41	1.60011e-37
ENSG00000176884	ENSG00000184188.6	-0.485899	2.10755e-41	1.60279e-37
ENSG00000176884	ENSG00000196604.10	-0.485852	2.15064e-41	1.63556e-37
ENSG00000168539	ENSG00000233328.3	-0.485711	2.28553e-41	1.73815e-37
ENSG00000168539	ENSG00000231313.2	-0.485639	2.35743e-41	1.79283e-37
ENSG00000176884	ENSG00000105996.6	-0.485595	2.40265e-41	1.82722e-37
ENSG00000168539	ENSG00000184661.12	-0.485523	2.478e-41	1.88452e-37
ENSG00000168539	ENSG00000271605.4	-0.485521	2.48044e-41	1.88638e-37
ENSG00000176884	ENSG00000175063.15	-0.485473	2.53218e-41	1.92572e-37
ENSG00000176884	ENSG00000147872.8	-0.485328	2.69598e-41	2.0503e-37
ENSG00000168539	ENSG00000104972.13	-0.485203	2.84429e-41	2.16309e-37
ENSG00000168539	ENSG00000169245.5	-0.485174	2.88032e-41	2.19048e-37
ENSG00000176884	ENSG00000155530.2	-0.485104	2.96843e-41	2.25749e-37
ENSG00000176884	ENSG00000165178.9	-0.485088	2.98825e-41	2.27256e-37
ENSG00000176884	ENSG00000274565.1	-0.484948	3.17502e-41	2.4146e-37
ENSG00000176884	ENSG00000220267.1	-0.48469	3.54652e-41	2.69713e-37
ENSG00000176884	ENSG00000179299.15	-0.484562	3.74756e-41	2.85002e-37
ENSG00000176884	ENSG00000155659.13	-0.484392	4.03116e-41	3.0657e-37
ENSG00000176884	ENSG00000132205.9	-0.484258	4.26969e-41	3.2471e-37
ENSG00000176884	ENSG00000240342.3	-0.484053	4.66179e-41	3.54529e-37
ENSG00000168539	ENSG00000236876.3	-0.484022	4.72488e-41	3.59327e-37
ENSG00000176884	ENSG00000154839.8	-0.483984	4.80265e-41	3.65241e-37
ENSG00000168539	ENSG00000159399.8	-0.483959	4.85347e-41	3.69106e-37
ENSG00000176884	ENSG00000150457.8	-0.483872	5.03789e-41	3.83132e-37
ENSG00000176884	ENSG00000164056.9	-0.483852	5.08161e-41	3.86456e-37
ENSG00000176884	ENSG00000167850.3	-0.483807	5.18121e-41	3.94031e-37
ENSG00000168539	ENSG00000253676.1	-0.483741	5.3283e-41	4.05217e-37
ENSG00000168539	ENSG00000213539.4	-0.483708	5.40355e-41	4.1094e-37
ENSG00000168539	ENSG00000258745.1	-0.483572	5.72746e-41	4.35573e-37
ENSG00000176884	ENSG00000136634.5	-0.483554	5.77246e-41	4.38995e-37
ENSG00000176884	ENSG00000249485.1	-0.483536	5.81854e-41	4.425e-37
ENSG00000168539	ENSG00000143119.11	-0.483482	5.95473e-41	4.52857e-37
ENSG00000176884	ENSG00000130300.7	-0.483385	6.20554e-41	4.71931e-37
ENSG00000168539	ENSG00000269378.1	-0.483317	6.38938e-41	4.85912e-37
ENSG00000176884	ENSG00000137807.12	-0.483303	6.42813e-41	4.88859e-37
ENSG00000176884	ENSG00000124635.8	-0.483269	6.52188e-41	4.95989e-37
ENSG00000176884	ENSG00000123219.11	-0.483177	6.78332e-41	5.15872e-37
ENSG00000168539	ENSG00000042493.14	-0.483077	7.07981e-41	5.3842e-37
ENSG00000168539	ENSG00000134802.16	-0.483059	7.13343e-41	5.42497e-37
ENSG00000176884	ENSG00000112715.19	-0.48301	7.28657e-41	5.54144e-37
ENSG00000176884	ENSG00000236060.2	-0.482986	7.35995e-41	5.59724e-37
ENSG00000168539	ENSG00000117399.12	-0.482889	7.67064e-41	5.83353e-37
ENSG00000176884	ENSG00000128710.5	-0.482866	7.74664e-41	5.89132e-37
ENSG00000176884	ENSG00000204577.10	-0.482819	7.90601e-41	6.01252e-37
ENSG00000176884	ENSG00000106366.8	-0.48276	8.10655e-41	6.16503e-37
ENSG00000168539	ENSG00000139354.9	-0.482717	8.25733e-41	6.2797e-37
ENSG00000168539	ENSG00000253958.1	-0.482685	8.36989e-41	6.3653e-37
ENSG00000176884	ENSG00000087303.15	-0.482479	9.1384e-41	6.94975e-37
ENSG00000168539	ENSG00000188765.7	-0.482454	9.23495e-41	7.02318e-37
ENSG00000176884	ENSG00000218358.2	-0.482411	9.4083e-41	7.15501e-37
ENSG00000168539	ENSG00000185607.5	-0.48236	9.61525e-41	7.3124e-37
ENSG00000176884	ENSG00000197757.7	-0.482246	1.00925e-40	7.67532e-37
ENSG00000168539	ENSG00000136231.12	-0.481984	1.12849e-40	8.58213e-37
ENSG00000168539	ENSG00000205403.11	-0.481956	1.14207e-40	8.68542e-37
ENSG00000168539	ENSG00000120833.12	-0.481915	1.16217e-40	8.83829e-37
ENSG00000176884	ENSG00000258818.3	-0.481914	1.16246e-40	8.84052e-37
ENSG00000168539	ENSG00000273983.1	-0.481904	1.16784e-40	8.88143e-37
ENSG00000168539	ENSG00000112297.13	-0.481794	1.22385e-40	9.30736e-37
ENSG00000168539	ENSG00000236591.1	-0.481676	1.28675e-40	9.78573e-37
ENSG00000176884	ENSG00000159399.8	-0.481616	1.31995e-40	1.00382e-36
ENSG00000176884	ENSG00000142798.15	-0.481429	1.42917e-40	1.08688e-36
ENSG00000168539	ENSG00000117676.12	-0.481363	1.46983e-40	1.11781e-36
ENSG00000176884	ENSG00000137462.6	-0.481293	1.51399e-40	1.15139e-36
ENSG00000176884	ENSG00000258867.4	-0.481258	1.53675e-40	1.1687e-36
ENSG00000176884	ENSG00000233380.1	-0.481137	1.61784e-40	1.23037e-36
ENSG00000176884	ENSG00000182326.13	-0.480944	1.75621e-40	1.33559e-36
ENSG00000168539	ENSG00000100558.7	-0.480929	1.76734e-40	1.34406e-36
ENSG00000168539	ENSG00000234664.1	-0.480924	1.77091e-40	1.34678e-36
ENSG00000176884	ENSG00000109805.8	-0.480736	1.91761e-40	1.45834e-36
ENSG00000168539	ENSG00000242267.5	-0.480663	1.97857e-40	1.5047e-36
ENSG00000176884	ENSG00000234009.1	-0.480449	2.16646e-40	1.64759e-36
ENSG00000176884	ENSG00000106483.10	-0.480281	2.32605e-40	1.76896e-36
ENSG00000176884	ENSG00000171522.5	-0.480169	2.43859e-40	1.85455e-36
ENSG00000176884	ENSG00000075275.15	-0.480144	2.46421e-40	1.87403e-36
ENSG00000176884	ENSG00000229132.2	-0.480125	2.48432e-40	1.88933e-36
ENSG00000176884	ENSG00000178458.5	-0.479876	2.76028e-40	2.09919e-36
ENSG00000176884	ENSG00000073792.14	-0.479827	2.8179e-40	2.14301e-36
ENSG00000176884	ENSG00000013588.5	-0.479591	3.11433e-40	2.36844e-36
ENSG00000176884	ENSG00000253330.1	-0.479472	3.27461e-40	2.49034e-36
ENSG00000176884	ENSG00000236591.1	-0.479433	3.32865e-40	2.53144e-36
ENSG00000168539	ENSG00000150457.8	-0.478951	4.08041e-40	3.10315e-36
ENSG00000168539	ENSG00000241081.1	-0.478905	4.1596e-40	3.16338e-36
ENSG00000168539	ENSG00000184106.7	-0.478783	4.37828e-40	3.32968e-36
ENSG00000176884	ENSG00000134057.13	-0.478653	4.62494e-40	3.51727e-36
ENSG00000168539	ENSG00000266928.1	-0.478615	4.69961e-40	3.57405e-36
ENSG00000168539	ENSG00000027869.10	-0.478554	4.8231e-40	3.66797e-36
ENSG00000176884	ENSG00000151725.10	-0.478499	4.93546e-40	3.75342e-36
ENSG00000176884	ENSG00000171812.9	-0.478447	5.04389e-40	3.83588e-36
ENSG00000168539	ENSG00000226608.3	-0.478445	5.04937e-40	3.84005e-36
ENSG00000168539	ENSG00000233834.5	-0.478262	5.45301e-40	4.14701e-36
ENSG00000176884	ENSG00000095303.13	-0.478202	5.5912e-40	4.25211e-36
ENSG00000176884	ENSG00000232888.4	-0.478182	5.64031e-40	4.28945e-36
ENSG00000168539	ENSG00000095970.15	-0.478149	5.71835e-40	4.3488e-36
ENSG00000168539	ENSG00000075275.15	-0.478066	5.92047e-40	4.50252e-36
ENSG00000168539	ENSG00000249014.2	-0.478008	6.06638e-40	4.61348e-36
ENSG00000176884	ENSG00000115165.8	-0.477902	6.34378e-40	4.82444e-36
ENSG00000168539	ENSG00000101916.11	-0.477816	6.57683e-40	5.00168e-36
ENSG00000168539	ENSG00000204252.11	-0.477692	6.92819e-40	5.26889e-36
ENSG00000176884	ENSG00000137078.7	-0.47758	7.2611e-40	5.52207e-36
ENSG00000176884	ENSG00000229994.1	-0.477555	7.33944e-40	5.58165e-36
ENSG00000176884	ENSG00000123146.18	-0.477496	7.5214e-40	5.72003e-36
ENSG00000176884	ENSG00000253958.1	-0.477168	8.63162e-40	6.56435e-36
ENSG00000168539	ENSG00000107249.20	-0.477066	9.00779e-40	6.85042e-36
ENSG00000176884	ENSG00000196735.10	-0.476985	9.32108e-40	7.08868e-36
ENSG00000168539	ENSG00000253293.4	-0.476954	9.44136e-40	7.18016e-36
ENSG00000176884	ENSG00000231167.3	-0.47673	1.03714e-39	7.88744e-36
ENSG00000176884	ENSG00000214612.3	-0.476715	1.04359e-39	7.9365e-36
ENSG00000176884	ENSG00000090889.11	-0.476696	1.05184e-39	7.99926e-36
ENSG00000176884	ENSG00000180818.4	-0.476646	1.0743e-39	8.17005e-36
ENSG00000176884	ENSG00000278828.1	-0.476357	1.21226e-39	9.21923e-36
ENSG00000176884	ENSG00000249026.2	-0.47621	1.28891e-39	9.80214e-36
ENSG00000168539	ENSG00000164692.16	-0.476129	1.33333e-39	1.01399e-35
ENSG00000176884	ENSG00000152763.15	-0.476063	1.37045e-39	1.04223e-35
ENSG00000176884	ENSG00000171848.12	-0.476053	1.37633e-39	1.0467e-35
ENSG00000176884	ENSG00000167900.10	-0.476027	1.3913e-39	1.05808e-35
ENSG00000168539	ENSG00000196735.10	-0.475949	1.43757e-39	1.09327e-35
ENSG00000168539	ENSG00000137078.7	-0.475926	1.45144e-39	1.10382e-35
ENSG00000176884	ENSG00000119408.15	-0.475901	1.46645e-39	1.11524e-35
ENSG00000168539	ENSG00000012779.9	-0.475804	1.52709e-39	1.16136e-35
ENSG00000176884	ENSG00000164761.7	-0.475747	1.56356e-39	1.18909e-35
ENSG00000176884	ENSG00000228981.3	-0.47563	1.64161e-39	1.24844e-35
ENSG00000176884	ENSG00000185338.4	-0.475623	1.64648e-39	1.25215e-35
ENSG00000168539	ENSG00000182326.13	-0.475619	1.6493e-39	1.2543e-35
ENSG00000176884	ENSG00000229453.2	-0.475513	1.72412e-39	1.31119e-35
ENSG00000176884	ENSG00000230798.4	-0.475423	1.79008e-39	1.36136e-35
ENSG00000176884	ENSG00000155254.11	-0.475391	1.81428e-39	1.37976e-35
ENSG00000168539	ENSG00000134690.9	-0.475268	1.90955e-39	1.45221e-35
ENSG00000176884	ENSG00000122592.7	-0.475243	1.92921e-39	1.46716e-35
ENSG00000168539	ENSG00000230330.1	-0.475039	2.10024e-39	1.59723e-35
ENSG00000176884	ENSG00000135451.11	-0.475008	2.12769e-39	1.61811e-35
ENSG00000176884	ENSG00000204277.1	-0.474881	2.24326e-39	1.706e-35
ENSG00000176884	ENSG00000139055.5	-0.474835	2.28662e-39	1.73897e-35
ENSG00000168539	ENSG00000100196.9	-0.474723	2.39507e-39	1.82145e-35
ENSG00000176884	ENSG00000230581.2	-0.474672	2.44643e-39	1.86051e-35
ENSG00000168539	ENSG00000197496.5	-0.47457	2.55214e-39	1.9409e-35
ENSG00000176884	ENSG00000235001.3	-0.474453	2.67925e-39	2.03757e-35
ENSG00000176884	ENSG00000219487.2	-0.474303	2.85216e-39	2.16907e-35
ENSG00000176884	ENSG00000250746.1	-0.474201	2.97533e-39	2.26274e-35
ENSG00000168539	ENSG00000145386.8	-0.474021	3.20605e-39	2.4382e-35
ENSG00000168539	ENSG00000171522.5	-0.473981	3.2592e-39	2.47862e-35
ENSG00000176884	ENSG00000123009.4	-0.473981	3.25966e-39	2.47897e-35
ENSG00000176884	ENSG00000196209.11	-0.473962	3.28607e-39	2.49906e-35
ENSG00000168539	ENSG00000163823.3	-0.473793	3.52386e-39	2.67989e-35
ENSG00000176884	ENSG00000117676.12	-0.473697	3.66683e-39	2.78863e-35
ENSG00000176884	ENSG00000101160.12	-0.47367	3.70772e-39	2.81972e-35
ENSG00000176884	ENSG00000259394.2	-0.473518	3.94848e-39	3.00282e-35
ENSG00000176884	ENSG00000204252.11	-0.473496	3.98553e-39	3.031e-35
ENSG00000176884	ENSG00000173432.9	-0.47336	4.2159e-39	3.20619e-35
ENSG00000176884	ENSG00000118785.12	-0.473283	4.35337e-39	3.31074e-35
ENSG00000176884	ENSG00000229567.1	-0.473282	4.35437e-39	3.3115e-35
ENSG00000176884	ENSG00000253954.3	-0.473219	4.46877e-39	3.3985e-35
ENSG00000176884	ENSG00000221869.4	-0.473192	4.51921e-39	3.43686e-35
ENSG00000168539	ENSG00000135077.7	-0.473016	4.86097e-39	3.69677e-35
ENSG00000176884	ENSG00000078081.6	-0.472962	4.96953e-39	3.77933e-35
ENSG00000168539	ENSG00000131203.11	-0.472956	4.98339e-39	3.78987e-35
ENSG00000176884	ENSG00000105383.13	-0.47294	5.01644e-39	3.815e-35
ENSG00000168539	ENSG00000249565.2	-0.472735	5.45959e-39	4.15202e-35
ENSG00000168539	ENSG00000235508.3	-0.472612	5.74485e-39	4.36896e-35
ENSG00000176884	ENSG00000230148.7	-0.472605	5.76006e-39	4.38052e-35
ENSG00000176884	ENSG00000182492.14	-0.472598	5.77714e-39	4.39352e-35
ENSG00000176884	ENSG00000196834.10	-0.472589	5.79939e-39	4.41043e-35
ENSG00000168539	ENSG00000137869.12	-0.472485	6.05281e-39	4.60316e-35
ENSG00000168539	ENSG00000086730.15	-0.472458	6.1213e-39	4.65525e-35
ENSG00000176884	ENSG00000101057.14	-0.472182	6.85944e-39	5.2166e-35
ENSG00000176884	ENSG00000225492.5	-0.472155	6.93424e-39	5.27349e-35
ENSG00000176884	ENSG00000188460.4	-0.472115	7.05182e-39	5.36291e-35
ENSG00000168539	ENSG00000115457.8	-0.47209	7.1222e-39	5.41643e-35
ENSG00000176884	ENSG00000188488.12	-0.471971	7.48019e-39	5.68869e-35
ENSG00000176884	ENSG00000270882.2	-0.471928	7.61487e-39	5.79111e-35
ENSG00000176884	ENSG00000144810.14	-0.471829	7.93378e-39	6.03364e-35
ENSG00000176884	ENSG00000069011.14	-0.471798	8.03455e-39	6.11028e-35
ENSG00000176884	ENSG00000165891.14	-0.471284	9.92792e-39	7.55018e-35
ENSG00000176884	ENSG00000091128.11	-0.47128	9.94236e-39	7.56117e-35
ENSG00000168539	ENSG00000213399.3	-0.471249	1.00716e-38	7.65949e-35
ENSG00000168539	ENSG00000230067.3	-0.47124	1.01072e-38	7.68655e-35
ENSG00000176884	ENSG00000121236.18	-0.470964	1.13208e-38	8.60949e-35
ENSG00000168539	ENSG00000129654.7	-0.470947	1.13989e-38	8.66884e-35
ENSG00000168539	ENSG00000091128.11	-0.470807	1.20743e-38	9.18251e-35
ENSG00000176884	ENSG00000173200.11	-0.470792	1.2147e-38	9.23776e-35
ENSG00000176884	ENSG00000117122.12	-0.47076	1.23099e-38	9.36167e-35
ENSG00000176884	ENSG00000242512.7	-0.470692	1.26584e-38	9.62669e-35
ENSG00000168539	ENSG00000080986.11	-0.470601	1.31404e-38	9.99326e-35
ENSG00000176884	ENSG00000147443.11	-0.470578	1.32616e-38	1.00854e-34
ENSG00000176884	ENSG00000269242.1	-0.470161	1.5734e-38	1.19657e-34
ENSG00000176884	ENSG00000104368.16	-0.47007	1.63314e-38	1.24201e-34
ENSG00000176884	ENSG00000266920.1	-0.469992	1.68643e-38	1.28253e-34
ENSG00000176884	ENSG00000148735.13	-0.469743	1.86714e-38	1.41996e-34
ENSG00000168539	ENSG00000188257.9	-0.469709	1.89345e-38	1.43997e-34
ENSG00000168539	ENSG00000205129.7	-0.469701	1.89973e-38	1.44475e-34
ENSG00000168539	ENSG00000253330.1	-0.469676	1.91917e-38	1.45953e-34
ENSG00000168539	ENSG00000173110.7	-0.469529	2.0381e-38	1.54998e-34
ENSG00000176884	ENSG00000256745.1	-0.469496	2.0658e-38	1.57104e-34
ENSG00000168539	ENSG00000185338.4	-0.469456	2.09916e-38	1.59641e-34
ENSG00000168539	ENSG00000131724.9	-0.469322	2.21726e-38	1.68623e-34
ENSG00000176884	ENSG00000258256.1	-0.469291	2.24626e-38	1.70828e-34
ENSG00000176884	ENSG00000237352.2	-0.468932	2.6007e-38	1.97783e-34
ENSG00000176884	ENSG00000095970.15	-0.468902	2.63271e-38	2.00218e-34
ENSG00000168539	ENSG00000126787.11	-0.468764	2.78431e-38	2.11747e-34
ENSG00000176884	ENSG00000182487.11	-0.468743	2.80799e-38	2.13548e-34
ENSG00000168539	ENSG00000258867.4	-0.468714	2.84165e-38	2.16107e-34
ENSG00000176884	ENSG00000012223.11	-0.468602	2.9752e-38	2.26264e-34
ENSG00000168539	ENSG00000179750.14	-0.46835	3.29573e-38	2.5064e-34
ENSG00000176884	ENSG00000240350.2	-0.468344	3.30407e-38	2.51275e-34
ENSG00000176884	ENSG00000112297.13	-0.468183	3.52768e-38	2.6828e-34
ENSG00000168539	ENSG00000204262.10	-0.467842	4.05211e-38	3.08163e-34
ENSG00000176884	ENSG00000150687.10	-0.467829	4.07481e-38	3.0989e-34
ENSG00000168539	ENSG00000165078.10	-0.467797	4.12668e-38	3.13834e-34
ENSG00000176884	ENSG00000128714.5	-0.467644	4.3913e-38	3.33958e-34
ENSG00000168539	ENSG00000112984.10	-0.467516	4.62673e-38	3.51863e-34
ENSG00000176884	ENSG00000229145.1	-0.467495	4.66564e-38	3.54822e-34
ENSG00000176884	ENSG00000029559.6	-0.467384	4.88106e-38	3.71205e-34
ENSG00000176884	ENSG00000240376.1	-0.467322	5.0046e-38	3.80599e-34
ENSG00000168539	ENSG00000254369.5	-0.467286	5.0786e-38	3.86228e-34
ENSG00000168539	ENSG00000100368.12	-0.467217	5.22397e-38	3.97283e-34
ENSG00000176884	ENSG00000079257.6	-0.467179	5.30478e-38	4.03428e-34
ENSG00000176884	ENSG00000242267.5	-0.467107	5.4614e-38	4.1534e-34
ENSG00000168539	ENSG00000240342.3	-0.467026	5.64344e-38	4.29183e-34
ENSG00000168539	ENSG00000206337.9	-0.466948	5.82461e-38	4.42961e-34
ENSG00000168539	ENSG00000185905.3	-0.466826	6.11986e-38	4.65416e-34
ENSG00000176884	ENSG00000085491.14	-0.466794	6.19925e-38	4.71453e-34
ENSG00000168539	ENSG00000130300.7	-0.466771	6.25808e-38	4.75927e-34
ENSG00000176884	ENSG00000273615.1	-0.466539	6.87439e-38	5.22797e-34
ENSG00000168539	ENSG00000179299.15	-0.466464	7.08577e-38	5.38873e-34
ENSG00000176884	ENSG00000234589.4	-0.466323	7.50095e-38	5.70447e-34
ENSG00000176884	ENSG00000197496.5	-0.465948	8.72857e-38	6.63808e-34
ENSG00000176884	ENSG00000089685.13	-0.465861	9.04146e-38	6.87603e-34
ENSG00000176884	ENSG00000175592.7	-0.465831	9.15291e-38	6.96079e-34
ENSG00000168539	ENSG00000225492.5	-0.465633	9.91136e-38	7.53759e-34
ENSG00000176884	ENSG00000188820.11	-0.465587	1.00982e-37	7.67969e-34
ENSG00000168539	ENSG00000078081.6	-0.465472	1.05761e-37	8.04315e-34
ENSG00000176884	ENSG00000214110.3	-0.465265	1.15002e-37	8.74591e-34
ENSG00000168539	ENSG00000112303.12	-0.465197	1.18164e-37	8.98638e-34
ENSG00000176884	ENSG00000240463.1	-0.465163	1.19787e-37	9.10981e-34
ENSG00000176884	ENSG00000159556.8	-0.465162	1.19853e-37	9.11485e-34
ENSG00000168539	ENSG00000124635.8	-0.465088	1.23471e-37	9.38997e-34
ENSG00000168539	ENSG00000220267.1	-0.465056	1.25085e-37	9.51271e-34
ENSG00000168539	ENSG00000150782.10	-0.465003	1.2777e-37	9.71693e-34
ENSG00000168539	ENSG00000164778.4	-0.464849	1.35967e-37	1.03403e-33
ENSG00000168539	ENSG00000226329.2	-0.464793	1.39073e-37	1.05765e-33
ENSG00000168539	ENSG00000273812.1	-0.464572	1.51971e-37	1.15574e-33
ENSG00000168539	ENSG00000115956.9	-0.464367	1.65002e-37	1.25484e-33
ENSG00000176884	ENSG00000141753.6	-0.464362	1.65346e-37	1.25746e-33
ENSG00000176884	ENSG00000105967.14	-0.464259	1.72341e-37	1.31065e-33
ENSG00000176884	ENSG00000206337.9	-0.464235	1.74037e-37	1.32355e-33
ENSG00000176884	ENSG00000228118.3	-0.464216	1.75346e-37	1.3335e-33
ENSG00000176884	ENSG00000184260.5	-0.464169	1.78665e-37	1.35874e-33
ENSG00000168539	ENSG00000237352.2	-0.464118	1.82366e-37	1.38689e-33
ENSG00000168539	ENSG00000108950.10	-0.464103	1.835e-37	1.39551e-33
ENSG00000176884	ENSG00000250133.2	-0.464072	1.8579e-37	1.41293e-33
ENSG00000168539	ENSG00000125245.11	-0.464022	1.89523e-37	1.44133e-33
ENSG00000168539	ENSG00000142700.10	-0.463791	2.07972e-37	1.58163e-33
ENSG00000176884	ENSG00000213493.3	-0.463785	2.0841e-37	1.58496e-33
ENSG00000168539	ENSG00000217027.1	-0.463718	2.14121e-37	1.62839e-33
ENSG00000176884	ENSG00000100097.10	-0.46363	2.21781e-37	1.68664e-33
ENSG00000168539	ENSG00000123342.14	-0.463612	2.23408e-37	1.69902e-33
ENSG00000168539	ENSG00000227094.1	-0.463591	2.25343e-37	1.71373e-33
ENSG00000168539	ENSG00000114013.14	-0.463479	2.35629e-37	1.79196e-33
ENSG00000168539	ENSG00000258256.1	-0.46344	2.39351e-37	1.82027e-33
ENSG00000176884	ENSG00000164611.11	-0.463384	2.44817e-37	1.86183e-33
ENSG00000176884	ENSG00000125245.11	-0.463365	2.46675e-37	1.87596e-33
ENSG00000176884	ENSG00000276269.1	-0.463309	2.52196e-37	1.91795e-33
ENSG00000176884	ENSG00000249859.6	-0.463265	2.56698e-37	1.95219e-33
ENSG00000168539	ENSG00000119408.15	-0.46323	2.60334e-37	1.97984e-33
ENSG00000176884	ENSG00000101916.11	-0.463211	2.62337e-37	1.99508e-33
ENSG00000176884	ENSG00000166803.9	-0.46318	2.65646e-37	2.02024e-33
ENSG00000176884	ENSG00000125735.9	-0.463175	2.66105e-37	2.02373e-33
ENSG00000176884	ENSG00000128709.11	-0.463117	2.72427e-37	2.07181e-33
ENSG00000168539	ENSG00000116717.10	-0.463104	2.73824e-37	2.08243e-33
ENSG00000168539	ENSG00000121807.5	-0.463103	2.73909e-37	2.08308e-33
ENSG00000168539	ENSG00000235655.3	-0.463101	2.74152e-37	2.08492e-33
ENSG00000168539	ENSG00000230798.4	-0.463024	2.82688e-37	2.14984e-33
ENSG00000176884	ENSG00000121807.5	-0.463016	2.83612e-37	2.15687e-33
ENSG00000176884	ENSG00000099994.10	-0.46294	2.92313e-37	2.22304e-33
ENSG00000168539	ENSG00000160013.7	-0.462593	3.35916e-37	2.55464e-33
ENSG00000176884	ENSG00000116824.4	-0.462567	3.39385e-37	2.58102e-33
ENSG00000176884	ENSG00000143119.11	-0.462416	3.60516e-37	2.74172e-33
ENSG00000176884	ENSG00000230191.1	-0.462366	3.67728e-37	2.79657e-33
ENSG00000176884	ENSG00000142700.10	-0.462313	3.75628e-37	2.85665e-33
ENSG00000168539	ENSG00000278828.1	-0.462255	3.84438e-37	2.92365e-33
ENSG00000168539	ENSG00000216866.5	-0.462236	3.87296e-37	2.94539e-33
ENSG00000168539	ENSG00000138646.7	-0.462234	3.8758e-37	2.94754e-33
ENSG00000176884	ENSG00000184293.6	-0.462117	4.06155e-37	3.08881e-33
ENSG00000176884	ENSG00000234546.2	-0.46208	4.1216e-37	3.13448e-33
ENSG00000168539	ENSG00000090339.7	-0.462066	4.14488e-37	3.15218e-33
ENSG00000168539	ENSG00000137101.11	-0.461717	4.7632e-37	3.62241e-33
ENSG00000168539	ENSG00000164761.7	-0.461716	4.76506e-37	3.62383e-33
ENSG00000168539	ENSG00000280721.1	-0.461673	4.84779e-37	3.68674e-33
ENSG00000176884	ENSG00000137101.11	-0.46165	4.89153e-37	3.72001e-33
ENSG00000176884	ENSG00000242814.2	-0.461644	4.90294e-37	3.72868e-33
ENSG00000176884	ENSG00000136235.14	-0.461439	5.31981e-37	4.04571e-33
ENSG00000168539	ENSG00000174807.3	-0.461187	5.88128e-37	4.47271e-33
ENSG00000168539	ENSG00000231789.2	-0.461138	5.9976e-37	4.56118e-33
ENSG00000176884	ENSG00000133048.11	-0.461123	6.03288e-37	4.588e-33
ENSG00000176884	ENSG00000196136.15	-0.461038	6.24027e-37	4.74573e-33
ENSG00000176884	ENSG00000172965.13	-0.461033	6.25186e-37	4.75454e-33
ENSG00000176884	ENSG00000247774.5	-0.460943	6.47905e-37	4.92732e-33
ENSG00000176884	ENSG00000112096.15	-0.460826	6.78763e-37	5.16199e-33
ENSG00000176884	ENSG00000112303.12	-0.460769	6.94295e-37	5.28012e-33
ENSG00000168539	ENSG00000130303.11	-0.460656	7.2628e-37	5.52336e-33
ENSG00000168539	ENSG00000178789.7	-0.460616	7.3769e-37	5.61013e-33
ENSG00000176884	ENSG00000178999.11	-0.460604	7.41415e-37	5.63846e-33
ENSG00000168539	ENSG00000121236.18	-0.460569	7.51692e-37	5.71662e-33
ENSG00000168539	ENSG00000142798.15	-0.460503	7.71645e-37	5.86836e-33
ENSG00000168539	ENSG00000155254.11	-0.460435	7.92671e-37	6.02826e-33
ENSG00000176884	ENSG00000196183.5	-0.460061	9.19423e-37	6.99222e-33
ENSG00000168539	ENSG00000166145.13	-0.459825	1.00944e-36	7.67681e-33
ENSG00000176884	ENSG00000258427.3	-0.459671	1.07297e-36	8.15996e-33
ENSG00000176884	ENSG00000137673.7	-0.459595	1.10579e-36	8.4095e-33
ENSG00000176884	ENSG00000165078.10	-0.459419	1.18537e-36	9.01475e-33
ENSG00000176884	ENSG00000266913.1	-0.459404	1.19208e-36	9.06574e-33
ENSG00000176884	ENSG00000104611.10	-0.459293	1.24572e-36	9.47372e-33
ENSG00000176884	ENSG00000139329.4	-0.459159	1.31338e-36	9.98822e-33
ENSG00000176884	ENSG00000111341.8	-0.459125	1.33124e-36	1.01241e-32
ENSG00000168539	ENSG00000229567.1	-0.45907	1.3606e-36	1.03474e-32
ENSG00000176884	ENSG00000213553.4	-0.459069	1.36085e-36	1.03493e-32
ENSG00000176884	ENSG00000090339.7	-0.459053	1.36969e-36	1.04165e-32
ENSG00000176884	ENSG00000220583.1	-0.458988	1.40527e-36	1.06871e-32
ENSG00000176884	ENSG00000258745.1	-0.458556	1.66648e-36	1.26736e-32
ENSG00000176884	ENSG00000226329.2	-0.458443	1.74208e-36	1.32485e-32
ENSG00000168539	ENSG00000240758.2	-0.458279	1.85815e-36	1.41312e-32
ENSG00000176884	ENSG00000237350.1	-0.458113	1.98363e-36	1.50855e-32
ENSG00000176884	ENSG00000257017.7	-0.458107	1.98837e-36	1.51216e-32
ENSG00000168539	ENSG00000249485.1	-0.458085	2.00559e-36	1.52525e-32
ENSG00000176884	ENSG00000227173.1	-0.45806	2.02521e-36	1.54017e-32
ENSG00000168539	ENSG00000214612.3	-0.458049	2.03439e-36	1.54716e-32
ENSG00000176884	ENSG00000233406.5	-0.458021	2.05689e-36	1.56427e-32
ENSG00000168539	ENSG00000116824.4	-0.458006	2.06911e-36	1.57356e-32
ENSG00000176884	ENSG00000135245.9	-0.45791	2.14849e-36	1.63393e-32
ENSG00000168539	ENSG00000234546.2	-0.457894	2.16259e-36	1.64465e-32
ENSG00000168539	ENSG00000179869.13	-0.457689	2.34375e-36	1.78242e-32
ENSG00000176884	ENSG00000106952.6	-0.457627	2.40165e-36	1.82646e-32
ENSG00000168539	ENSG00000099994.10	-0.457526	2.4984e-36	1.90003e-32
ENSG00000176884	ENSG00000188219.13	-0.457468	2.5566e-36	1.9443e-32
ENSG00000168539	ENSG00000188820.11	-0.457452	2.57231e-36	1.95624e-32
ENSG00000176884	ENSG00000107249.20	-0.457322	2.70755e-36	2.05909e-32
ENSG00000176884	ENSG00000164136.15	-0.457264	2.76985e-36	2.10647e-32
ENSG00000168539	ENSG00000215895.4	-0.457151	2.89492e-36	2.20158e-32
ENSG00000168539	ENSG00000236060.2	-0.457105	2.94758e-36	2.24163e-32
ENSG00000176884	ENSG00000180806.4	-0.457093	2.96126e-36	2.25204e-32
ENSG00000176884	ENSG00000228630.4	-0.45702	3.04728e-36	2.31746e-32
ENSG00000168539	ENSG00000142173.13	-0.456684	3.47616e-36	2.64362e-32
ENSG00000176884	ENSG00000226396.1	-0.456639	3.53793e-36	2.6906e-32
ENSG00000176884	ENSG00000132432.12	-0.456609	3.57993e-36	2.72254e-32
ENSG00000168539	ENSG00000270882.2	-0.456385	3.90769e-36	2.9718e-32
ENSG00000168539	ENSG00000275830.1	-0.456372	3.92812e-36	2.98733e-32
ENSG00000168539	ENSG00000115461.4	-0.456287	4.06056e-36	3.08806e-32
ENSG00000176884	ENSG00000231298.5	-0.456264	4.09815e-36	3.11665e-32
ENSG00000168539	ENSG00000225101.4	-0.456196	4.20762e-36	3.1999e-32
ENSG00000168539	ENSG00000012223.11	-0.455943	4.64477e-36	3.53235e-32
ENSG00000168539	ENSG00000164136.15	-0.455721	5.06676e-36	3.85327e-32
ENSG00000176884	ENSG00000271605.4	-0.455693	5.12187e-36	3.89519e-32
ENSG00000168539	ENSG00000253882.5	-0.455656	5.19694e-36	3.95227e-32
ENSG00000168539	ENSG00000106366.8	-0.45561	5.29032e-36	4.02329e-32
ENSG00000168539	ENSG00000173432.9	-0.455546	5.42493e-36	4.12566e-32
ENSG00000168539	ENSG00000155307.16	-0.455538	5.44115e-36	4.138e-32
ENSG00000176884	ENSG00000236552.2	-0.455451	5.62834e-36	4.28036e-32
ENSG00000176884	ENSG00000254893.4	-0.455255	6.07691e-36	4.62149e-32
ENSG00000176884	ENSG00000100342.19	-0.455224	6.14997e-36	4.67705e-32
ENSG00000176884	ENSG00000183696.12	-0.45492	6.92211e-36	5.26426e-32
ENSG00000168539	ENSG00000120318.14	-0.454878	7.03777e-36	5.35223e-32
ENSG00000168539	ENSG00000123473.14	-0.454799	7.25577e-36	5.51801e-32
ENSG00000168539	ENSG00000213763.4	-0.454781	7.30742e-36	5.55729e-32
ENSG00000176884	ENSG00000182183.13	-0.45467	7.63207e-36	5.80419e-32
ENSG00000168539	ENSG00000118785.12	-0.454629	7.75319e-36	5.8963e-32
ENSG00000176884	ENSG00000249852.1	-0.454625	7.76676e-36	5.90662e-32
ENSG00000168539	ENSG00000147872.8	-0.454489	8.18723e-36	6.22639e-32
ENSG00000168539	ENSG00000229994.1	-0.454186	9.20864e-36	7.00317e-32
ENSG00000176884	ENSG00000123485.10	-0.454009	9.86477e-36	7.50216e-32
ENSG00000176884	ENSG00000205129.7	-0.453873	1.04022e-35	7.91088e-32
ENSG00000176884	ENSG00000164283.11	-0.453824	1.05987e-35	8.0603e-32
ENSG00000176884	ENSG00000235674.2	-0.453781	1.07795e-35	8.19782e-32
ENSG00000176884	ENSG00000170379.18	-0.45378	1.07832e-35	8.20061e-32
ENSG00000168539	ENSG00000254332.1	-0.453672	1.1244e-35	8.55104e-32
ENSG00000176884	ENSG00000229644.6	-0.453439	1.23045e-35	9.35754e-32
ENSG00000176884	ENSG00000256338.2	-0.453424	1.23787e-35	9.41398e-32
ENSG00000168539	ENSG00000232888.4	-0.453418	1.24054e-35	9.43431e-32
ENSG00000176884	ENSG00000218175.2	-0.453317	1.29018e-35	9.81179e-32
ENSG00000168539	ENSG00000137673.7	-0.45331	1.29374e-35	9.83889e-32
ENSG00000168539	ENSG00000234009.1	-0.453295	1.30101e-35	9.89415e-32
ENSG00000176884	ENSG00000232702.3	-0.45327	1.31372e-35	9.99081e-32
ENSG00000176884	ENSG00000149948.12	-0.452932	1.49764e-35	1.13895e-31
ENSG00000176884	ENSG00000162840.4	-0.452929	1.49951e-35	1.14038e-31
ENSG00000168539	ENSG00000224950.2	-0.452923	1.50254e-35	1.14268e-31
ENSG00000176884	ENSG00000213005.3	-0.452911	1.50987e-35	1.14826e-31
ENSG00000176884	ENSG00000224397.4	-0.452752	1.60574e-35	1.22116e-31
ENSG00000176884	ENSG00000233668.1	-0.45259	1.70904e-35	1.29972e-31
ENSG00000176884	ENSG00000159167.10	-0.452486	1.77934e-35	1.35319e-31
ENSG00000168539	ENSG00000132205.9	-0.45246	1.79722e-35	1.36679e-31
ENSG00000168539	ENSG00000237980.1	-0.452385	1.85036e-35	1.4072e-31
ENSG00000168539	ENSG00000174343.5	-0.452183	1.99966e-35	1.52075e-31
ENSG00000176884	ENSG00000115461.4	-0.45209	2.07333e-35	1.57677e-31
ENSG00000168539	ENSG00000196604.10	-0.452057	2.09953e-35	1.5967e-31
ENSG00000168539	ENSG00000107438.7	-0.452036	2.11639e-35	1.60952e-31
ENSG00000168539	ENSG00000112096.15	-0.45202	2.12963e-35	1.61958e-31
ENSG00000168539	ENSG00000250746.1	-0.451809	2.31041e-35	1.75707e-31
ENSG00000168539	ENSG00000165304.6	-0.451748	2.36485e-35	1.79847e-31
ENSG00000176884	ENSG00000217241.1	-0.451743	2.37006e-35	1.80243e-31
ENSG00000176884	ENSG00000232021.5	-0.451709	2.40109e-35	1.82603e-31
ENSG00000168539	ENSG00000172243.16	-0.451592	2.51156e-35	1.91004e-31
ENSG00000176884	ENSG00000107485.14	-0.451491	2.6115e-35	1.98604e-31
ENSG00000168539	ENSG00000100342.19	-0.451467	2.63593e-35	2.00462e-31
ENSG00000168539	ENSG00000143768.10	-0.451259	2.85551e-35	2.17162e-31
ENSG00000168539	ENSG00000179715.11	-0.451231	2.88571e-35	2.19458e-31
ENSG00000168539	ENSG00000164185.4	-0.45097	3.19036e-35	2.42627e-31
ENSG00000168539	ENSG00000204540.9	-0.450931	3.23902e-35	2.46327e-31
ENSG00000176884	ENSG00000224831.3	-0.450852	3.3393e-35	2.53954e-31
ENSG00000176884	ENSG00000135077.7	-0.450817	3.38415e-35	2.57365e-31
ENSG00000176884	ENSG00000228305.2	-0.450795	3.41218e-35	2.59496e-31
ENSG00000176884	ENSG00000134028.13	-0.450495	3.82883e-35	2.91182e-31
ENSG00000168539	ENSG00000024526.15	-0.45044	3.9109e-35	2.97424e-31
ENSG00000168539	ENSG00000269242.1	-0.450385	3.99436e-35	3.03771e-31
ENSG00000168539	ENSG00000157456.6	-0.450355	4.03996e-35	3.07239e-31
ENSG00000176884	ENSG00000133055.7	-0.450348	4.05079e-35	3.08062e-31
ENSG00000168539	ENSG00000144810.14	-0.450328	4.08321e-35	3.10528e-31
ENSG00000168539	ENSG00000182183.13	-0.450317	4.09908e-35	3.11735e-31
ENSG00000168539	ENSG00000240463.1	-0.450255	4.19845e-35	3.19292e-31
ENSG00000168539	ENSG00000125735.9	-0.450112	4.43426e-35	3.37226e-31
ENSG00000168539	ENSG00000081237.17	-0.450099	4.45718e-35	3.38969e-31
ENSG00000176884	ENSG00000213857.3	-0.450005	4.62119e-35	3.51442e-31
ENSG00000176884	ENSG00000271503.4	-0.449916	4.78098e-35	3.63593e-31
ENSG00000168539	ENSG00000105996.6	-0.449859	4.88542e-35	3.71536e-31
ENSG00000168539	ENSG00000123427.14	-0.449766	5.06302e-35	3.85042e-31
ENSG00000168539	ENSG00000231167.3	-0.449653	5.28694e-35	4.02071e-31
ENSG00000176884	ENSG00000261614.1	-0.449615	5.36429e-35	4.07954e-31
ENSG00000168539	ENSG00000175592.7	-0.449495	5.61735e-35	4.27199e-31
ENSG00000176884	ENSG00000140379.7	-0.449487	5.63462e-35	4.28513e-31
ENSG00000168539	ENSG00000106006.6	-0.449431	5.75524e-35	4.37686e-31
ENSG00000168539	ENSG00000173662.18	-0.44936	5.91311e-35	4.49692e-31
ENSG00000168539	ENSG00000231298.5	-0.449348	5.94059e-35	4.51782e-31
ENSG00000176884	ENSG00000131401.10	-0.449287	6.08237e-35	4.62564e-31
ENSG00000176884	ENSG00000251587.1	-0.449208	6.26789e-35	4.76673e-31
ENSG00000168539	ENSG00000183696.12	-0.44902	6.73479e-35	5.12181e-31
ENSG00000176884	ENSG00000233270.1	-0.449006	6.77034e-35	5.14884e-31
ENSG00000176884	ENSG00000185834.10	-0.449003	6.77904e-35	5.15546e-31
ENSG00000176884	ENSG00000204540.9	-0.4489	7.05111e-35	5.36237e-31
ENSG00000168539	ENSG00000273615.1	-0.448885	7.0916e-35	5.39316e-31
ENSG00000176884	ENSG00000133110.13	-0.448713	7.57222e-35	5.75867e-31
ENSG00000168539	ENSG00000147443.11	-0.448637	7.79564e-35	5.92858e-31
ENSG00000168539	ENSG00000100985.7	-0.448619	7.84839e-35	5.9687e-31
ENSG00000168539	ENSG00000162692.9	-0.448463	8.32894e-35	6.33416e-31
ENSG00000176884	ENSG00000255909.1	-0.448459	8.34249e-35	6.34446e-31
ENSG00000176884	ENSG00000165168.7	-0.448368	8.63696e-35	6.56841e-31
ENSG00000176884	ENSG00000166145.13	-0.448344	8.71488e-35	6.62766e-31
ENSG00000168539	ENSG00000240376.1	-0.448331	8.75801e-35	6.66047e-31
ENSG00000176884	ENSG00000213851.3	-0.448289	8.89816e-35	6.76705e-31
ENSG00000176884	ENSG00000162595.4	-0.448209	9.17643e-35	6.97868e-31
ENSG00000168539	ENSG00000248208.1	-0.448201	9.20458e-35	7.00008e-31
ENSG00000176884	ENSG00000224950.2	-0.448159	9.35166e-35	7.11194e-31
ENSG00000168539	ENSG00000248996.1	-0.448022	9.85136e-35	7.49196e-31
ENSG00000168539	ENSG00000173947.12	-0.448011	9.89261e-35	7.52333e-31
ENSG00000176884	ENSG00000242299.1	-0.447983	9.99988e-35	7.60491e-31
ENSG00000168539	ENSG00000123219.11	-0.447972	1.00411e-34	7.63629e-31
ENSG00000168539	ENSG00000233952.1	-0.447806	1.06974e-34	8.13536e-31
ENSG00000176884	ENSG00000232672.1	-0.447795	1.07413e-34	8.16876e-31
ENSG00000176884	ENSG00000086730.15	-0.447752	1.09182e-34	8.30328e-31
ENSG00000176884	ENSG00000258645.2	-0.447713	1.10787e-34	8.42531e-31
ENSG00000176884	ENSG00000143768.10	-0.447688	1.11878e-34	8.50832e-31
ENSG00000176884	ENSG00000167600.12	-0.447681	1.12147e-34	8.5288e-31
ENSG00000176884	ENSG00000214391.3	-0.447643	1.13812e-34	8.65538e-31
ENSG00000168539	ENSG00000197905.7	-0.447634	1.14163e-34	8.68212e-31
ENSG00000176884	ENSG00000240758.2	-0.44752	1.19249e-34	9.06892e-31
ENSG00000168539	ENSG00000150337.12	-0.447499	1.20183e-34	9.13989e-31
ENSG00000168539	ENSG00000125730.15	-0.447357	1.26875e-34	9.64885e-31
ENSG00000176884	ENSG00000145649.7	-0.44735	1.27205e-34	9.67396e-31
ENSG00000168539	ENSG00000234589.4	-0.447344	1.27468e-34	9.69392e-31
ENSG00000176884	ENSG00000162739.12	-0.447339	1.27708e-34	9.71218e-31
ENSG00000176884	ENSG00000179172.8	-0.447334	1.27945e-34	9.73019e-31
ENSG00000176884	ENSG00000143382.12	-0.44732	1.28654e-34	9.78412e-31
ENSG00000168539	ENSG00000107485.14	-0.447273	1.30983e-34	9.96126e-31
ENSG00000168539	ENSG00000115380.17	-0.447007	1.44892e-34	1.1019e-30
ENSG00000176884	ENSG00000131724.9	-0.446917	1.49913e-34	1.14009e-30
ENSG00000176884	ENSG00000122642.9	-0.446802	1.56611e-34	1.19103e-30
ENSG00000176884	ENSG00000130592.12	-0.446639	1.66548e-34	1.2666e-30
ENSG00000176884	ENSG00000231940.1	-0.44651	1.74933e-34	1.33037e-30
ENSG00000176884	ENSG00000157335.18	-0.446348	1.85967e-34	1.41428e-30
ENSG00000176884	ENSG00000172183.13	-0.446233	1.942e-34	1.47689e-30
ENSG00000176884	ENSG00000235013.1	-0.446206	1.96248e-34	1.49247e-30
ENSG00000168539	ENSG00000147206.15	-0.446194	1.97085e-34	1.49883e-30
ENSG00000168539	ENSG00000256262.1	-0.446187	1.97646e-34	1.5031e-30
ENSG00000168539	ENSG00000233380.1	-0.446187	1.97674e-34	1.50331e-30
ENSG00000168539	ENSG00000171051.7	-0.446059	2.07421e-34	1.57744e-30
ENSG00000176884	ENSG00000258895.1	-0.445941	2.16915e-34	1.64964e-30
ENSG00000176884	ENSG00000231817.6	-0.445925	2.18198e-34	1.6594e-30
ENSG00000168539	ENSG00000112715.19	-0.445828	2.26359e-34	1.72146e-30
ENSG00000176884	ENSG00000225101.4	-0.445781	2.30393e-34	1.75214e-30
ENSG00000176884	ENSG00000104972.13	-0.445699	2.3765e-34	1.80733e-30
ENSG00000176884	ENSG00000100385.12	-0.445677	2.39679e-34	1.82276e-30
ENSG00000176884	ENSG00000082929.7	-0.445599	2.46774e-34	1.87671e-30
ENSG00000176884	ENSG00000197744.5	-0.445569	2.49586e-34	1.8981e-30
ENSG00000176884	ENSG00000279274.1	-0.445559	2.50541e-34	1.90536e-30
ENSG00000176884	ENSG00000012779.9	-0.445475	2.58611e-34	1.96674e-30
ENSG00000168539	ENSG00000249852.1	-0.445374	2.68698e-34	2.04345e-30
ENSG00000168539	ENSG00000228981.3	-0.44535	2.71163e-34	2.0622e-30
ENSG00000168539	ENSG00000186810.7	-0.445337	2.72507e-34	2.07241e-30
ENSG00000176884	ENSG00000248693.1	-0.445312	2.7505e-34	2.09175e-30
ENSG00000176884	ENSG00000237214.3	-0.445262	2.80245e-34	2.13126e-30
ENSG00000176884	ENSG00000133106.13	-0.445235	2.83117e-34	2.15311e-30
ENSG00000168539	ENSG00000235545.1	-0.445228	2.83886e-34	2.15895e-30
ENSG00000168539	ENSG00000133055.7	-0.44519	2.87993e-34	2.19019e-30
ENSG00000168539	ENSG00000259394.2	-0.445141	2.93395e-34	2.23127e-30
ENSG00000176884	ENSG00000231503.4	-0.445132	2.94348e-34	2.23852e-30
ENSG00000168539	ENSG00000013588.5	-0.445056	3.02951e-34	2.30394e-30
ENSG00000176884	ENSG00000123610.4	-0.445025	3.06491e-34	2.33087e-30
ENSG00000168539	ENSG00000132122.10	-0.444991	3.1042e-34	2.36074e-30
ENSG00000168539	ENSG00000162739.12	-0.444823	3.30652e-34	2.51461e-30
ENSG00000168539	ENSG00000145649.7	-0.444814	3.31838e-34	2.52363e-30
ENSG00000176884	ENSG00000237999.2	-0.444735	3.41816e-34	2.59951e-30
ENSG00000176884	ENSG00000176183.8	-0.444579	3.62455e-34	2.75647e-30
ENSG00000176884	ENSG00000138646.7	-0.444542	3.67556e-34	2.79527e-30
ENSG00000176884	ENSG00000231848.1	-0.444485	3.75616e-34	2.85656e-30
ENSG00000176884	ENSG00000258153.1	-0.44446	3.79123e-34	2.88323e-30
ENSG00000176884	ENSG00000186810.7	-0.444383	3.90263e-34	2.96795e-30
ENSG00000176884	ENSG00000130303.11	-0.444346	3.95783e-34	3.00993e-30
ENSG00000176884	ENSG00000178789.7	-0.444291	4.03914e-34	3.07176e-30
ENSG00000168539	ENSG00000232021.5	-0.444258	4.09018e-34	3.11058e-30
ENSG00000176884	ENSG00000149131.14	-0.444135	4.28449e-34	3.25836e-30
ENSG00000176884	ENSG00000204362.5	-0.4441	4.33998e-34	3.30056e-30
ENSG00000176884	ENSG00000230216.1	-0.444099	4.34198e-34	3.30208e-30
ENSG00000176884	ENSG00000234782.3	-0.443916	4.65129e-34	3.53731e-30
ENSG00000168539	ENSG00000228118.3	-0.443894	4.68928e-34	3.5662e-30
ENSG00000176884	ENSG00000253525.1	-0.443857	4.75509e-34	3.61625e-30
ENSG00000176884	ENSG00000091136.12	-0.443854	4.76101e-34	3.62075e-30
ENSG00000168539	ENSG00000164056.9	-0.443784	4.88742e-34	3.71688e-30
ENSG00000168539	ENSG00000175063.15	-0.443655	5.12959e-34	3.90105e-30
ENSG00000176884	ENSG00000218582.2	-0.443637	5.16473e-34	3.92778e-30
ENSG00000168539	ENSG00000269640.4	-0.443582	5.27194e-34	4.00931e-30
ENSG00000168539	ENSG00000229644.6	-0.443472	5.49357e-34	4.17786e-30
ENSG00000176884	ENSG00000228974.5	-0.443435	5.57117e-34	4.23688e-30
ENSG00000176884	ENSG00000230777.1	-0.443381	5.68493e-34	4.32339e-30
ENSG00000168539	ENSG00000241399.5	-0.443369	5.70944e-34	4.34203e-30
ENSG00000168539	ENSG00000257017.7	-0.443291	5.87933e-34	4.47123e-30
ENSG00000176884	ENSG00000172215.5	-0.443285	5.89283e-34	4.4815e-30
ENSG00000176884	ENSG00000228347.1	-0.443226	6.02493e-34	4.58196e-30
ENSG00000168539	ENSG00000123146.18	-0.443166	6.16068e-34	4.6852e-30
ENSG00000176884	ENSG00000163823.3	-0.443123	6.26021e-34	4.76089e-30
ENSG00000176884	ENSG00000222038.3	-0.443084	6.35397e-34	4.83219e-30
ENSG00000168539	ENSG00000154839.8	-0.443058	6.41547e-34	4.87897e-30
ENSG00000176884	ENSG00000158402.17	-0.443029	6.48434e-34	4.93134e-30
ENSG00000176884	ENSG00000115884.9	-0.44302	6.50798e-34	4.94932e-30
ENSG00000176884	ENSG00000179344.15	-0.442853	6.92672e-34	5.26777e-30
ENSG00000168539	ENSG00000230191.1	-0.442834	6.97623e-34	5.30542e-30
ENSG00000168539	ENSG00000188460.4	-0.442828	6.99224e-34	5.3176e-30
ENSG00000168539	ENSG00000235001.3	-0.442798	7.07068e-34	5.37725e-30
ENSG00000168539	ENSG00000109805.8	-0.44279	7.09143e-34	5.39303e-30
ENSG00000168539	ENSG00000276269.1	-0.442772	7.13963e-34	5.42969e-30
ENSG00000176884	ENSG00000227992.1	-0.442756	7.1823e-34	5.46214e-30
ENSG00000168539	ENSG00000219487.2	-0.442743	7.21841e-34	5.4896e-30
ENSG00000168539	ENSG00000249859.6	-0.442718	7.28669e-34	5.54153e-30
ENSG00000176884	ENSG00000255397.1	-0.442673	7.40987e-34	5.63521e-30
ENSG00000168539	ENSG00000229132.2	-0.442656	7.45523e-34	5.6697e-30
ENSG00000168539	ENSG00000213493.3	-0.442655	7.45994e-34	5.67328e-30
ENSG00000176884	ENSG00000236739.3	-0.442614	7.57552e-34	5.76118e-30
ENSG00000168539	ENSG00000188488.12	-0.442587	7.65237e-34	5.81963e-30
ENSG00000176884	ENSG00000229944.3	-0.442287	8.56017e-34	6.51001e-30
ENSG00000176884	ENSG00000259051.1	-0.442274	8.59875e-34	6.53935e-30
ENSG00000176884	ENSG00000115380.17	-0.442166	8.9531e-34	6.80883e-30
ENSG00000176884	ENSG00000185905.3	-0.442131	9.07182e-34	6.89912e-30
ENSG00000168539	ENSG00000130487.5	-0.4421	9.1784e-34	6.98017e-30
ENSG00000176884	ENSG00000204434.5	-0.442	9.52548e-34	7.24413e-30
ENSG00000176884	ENSG00000213080.3	-0.441968	9.64221e-34	7.3329e-30
ENSG00000176884	ENSG00000150782.10	-0.44187	9.99887e-34	7.60414e-30
ENSG00000176884	ENSG00000249740.1	-0.441851	1.00698e-33	7.65807e-30
ENSG00000176884	ENSG00000228462.1	-0.441749	1.04601e-33	7.95491e-30
ENSG00000176884	ENSG00000132122.10	-0.44163	1.09344e-33	8.31563e-30
ENSG00000168539	ENSG00000021355.11	-0.441558	1.12343e-33	8.54372e-30
ENSG00000176884	ENSG00000276980.1	-0.44155	1.12638e-33	8.56612e-30
ENSG00000168539	ENSG00000236552.2	-0.441542	1.12977e-33	8.59193e-30
ENSG00000176884	ENSG00000123388.4	-0.441541	1.13021e-33	8.59525e-30
ENSG00000168539	ENSG00000271503.4	-0.441496	1.14941e-33	8.74128e-30
ENSG00000168539	ENSG00000179344.15	-0.441439	1.17407e-33	8.92877e-30
ENSG00000176884	ENSG00000171540.7	-0.441431	1.17749e-33	8.95479e-30
ENSG00000168539	ENSG00000085491.14	-0.441415	1.18475e-33	9.01006e-30
ENSG00000168539	ENSG00000273341.1	-0.441219	1.27444e-33	9.69214e-30
ENSG00000168539	ENSG00000127951.5	-0.441165	1.30027e-33	9.88858e-30
ENSG00000168539	ENSG00000226396.1	-0.440969	1.39834e-33	1.06343e-29
ENSG00000176884	ENSG00000128692.8	-0.440883	1.44405e-33	1.0982e-29
ENSG00000168539	ENSG00000140379.7	-0.440837	1.46886e-33	1.11707e-29
ENSG00000176884	ENSG00000177045.7	-0.440811	1.48313e-33	1.12792e-29
ENSG00000176884	ENSG00000235174.1	-0.440769	1.50651e-33	1.1457e-29
ENSG00000176884	ENSG00000130487.5	-0.440712	1.5388e-33	1.17026e-29
ENSG00000176884	ENSG00000180389.6	-0.440572	1.62054e-33	1.23242e-29
ENSG00000176884	ENSG00000233952.1	-0.440502	1.66308e-33	1.26477e-29
ENSG00000168539	ENSG00000259171.1	-0.440449	1.69637e-33	1.29009e-29
ENSG00000176884	ENSG00000160883.9	-0.440437	1.70413e-33	1.29599e-29
ENSG00000176884	ENSG00000248996.1	-0.440335	1.76999e-33	1.34607e-29
ENSG00000168539	ENSG00000196136.15	-0.440312	1.78474e-33	1.35729e-29
ENSG00000176884	ENSG00000047457.12	-0.440267	1.81507e-33	1.38036e-29
ENSG00000168539	ENSG00000100385.12	-0.440114	1.92106e-33	1.46097e-29
ENSG00000168539	ENSG00000162595.4	-0.440054	1.96438e-33	1.49391e-29
ENSG00000176884	ENSG00000254387.1	-0.439989	2.01201e-33	1.53013e-29
ENSG00000176884	ENSG00000145040.3	-0.439975	2.02271e-33	1.53827e-29
ENSG00000176884	ENSG00000135903.17	-0.43993	2.05612e-33	1.56368e-29
ENSG00000168539	ENSG00000196183.5	-0.439907	2.07369e-33	1.57704e-29
ENSG00000176884	ENSG00000234287.1	-0.439897	2.08152e-33	1.583e-29
ENSG00000176884	ENSG00000198406.7	-0.439853	2.11586e-33	1.60911e-29
ENSG00000176884	ENSG00000123685.7	-0.439805	2.15384e-33	1.63799e-29
ENSG00000168539	ENSG00000015413.8	-0.4398	2.15753e-33	1.6408e-29
ENSG00000176884	ENSG00000260342.2	-0.439717	2.22549e-33	1.69248e-29
ENSG00000168539	ENSG00000249026.2	-0.43951	2.40233e-33	1.82698e-29
ENSG00000176884	ENSG00000213296.4	-0.439507	2.40501e-33	1.82901e-29
ENSG00000168539	ENSG00000253954.3	-0.439474	2.43409e-33	1.85112e-29
ENSG00000176884	ENSG00000093009.8	-0.439451	2.45533e-33	1.86728e-29
ENSG00000176884	ENSG00000152592.12	-0.439444	2.46148e-33	1.87195e-29
ENSG00000176884	ENSG00000213846.4	-0.439335	2.56299e-33	1.94915e-29
ENSG00000168539	ENSG00000240350.2	-0.439142	2.75293e-33	2.0936e-29
ENSG00000176884	ENSG00000021355.11	-0.439093	2.80275e-33	2.13149e-29
ENSG00000176884	ENSG00000213275.2	-0.439086	2.81026e-33	2.1372e-29
ENSG00000176884	ENSG00000115956.9	-0.439001	2.89968e-33	2.20521e-29
ENSG00000168539	ENSG00000135245.9	-0.438993	2.90797e-33	2.21151e-29
ENSG00000176884	ENSG00000180638.16	-0.438949	2.95602e-33	2.24805e-29
ENSG00000176884	ENSG00000163064.6	-0.438894	3.01597e-33	2.29365e-29
ENSG00000168539	ENSG00000029559.6	-0.438889	3.022e-33	2.29823e-29
ENSG00000176884	ENSG00000222041.9	-0.438862	3.05226e-33	2.32124e-29
ENSG00000168539	ENSG00000117226.10	-0.438734	3.19998e-33	2.43358e-29
ENSG00000176884	ENSG00000123364.4	-0.438661	3.28786e-33	2.50042e-29
ENSG00000176884	ENSG00000163081.2	-0.438615	3.34343e-33	2.54267e-29
ENSG00000168539	ENSG00000014257.14	-0.438571	3.39829e-33	2.5844e-29
ENSG00000168539	ENSG00000135451.11	-0.438508	3.47872e-33	2.64557e-29
ENSG00000168539	ENSG00000144481.15	-0.438422	3.58998e-33	2.73018e-29
ENSG00000168539	ENSG00000008323.14	-0.438354	3.68139e-33	2.79969e-29
ENSG00000168539	ENSG00000160883.9	-0.438323	3.72381e-33	2.83196e-29
ENSG00000168539	ENSG00000239998.4	-0.438174	3.93438e-33	2.99209e-29
ENSG00000168539	ENSG00000260187.1	-0.43815	3.96811e-33	3.01775e-29
ENSG00000176884	ENSG00000250444.1	-0.438091	4.05603e-33	3.08461e-29
ENSG00000176884	ENSG00000256262.1	-0.438077	4.0762e-33	3.09995e-29
ENSG00000176884	ENSG00000230897.1	-0.438046	4.12282e-33	3.1354e-29
ENSG00000168539	ENSG00000149380.10	-0.437983	4.21973e-33	3.20911e-29
ENSG00000176884	ENSG00000230478.1	-0.437887	4.37148e-33	3.32451e-29
ENSG00000176884	ENSG00000184557.4	-0.437836	4.45426e-33	3.38747e-29
ENSG00000176884	ENSG00000234093.3	-0.437607	4.84668e-33	3.6859e-29
ENSG00000168539	ENSG00000128713.12	-0.437542	4.96367e-33	3.77487e-29
ENSG00000176884	ENSG00000234743.1	-0.437515	5.01302e-33	3.8124e-29
ENSG00000176884	ENSG00000232389.1	-0.437513	5.01636e-33	3.81494e-29
ENSG00000168539	ENSG00000204277.1	-0.437447	5.1401e-33	3.90904e-29
ENSG00000176884	ENSG00000122176.10	-0.437415	5.20002e-33	3.95461e-29
ENSG00000168539	ENSG00000258451.1	-0.437378	5.27161e-33	4.00906e-29
ENSG00000176884	ENSG00000164778.4	-0.437331	5.36272e-33	4.07835e-29
ENSG00000168539	ENSG00000162458.11	-0.437307	5.41086e-33	4.11496e-29
ENSG00000168539	ENSG00000132432.12	-0.437151	5.73042e-33	4.35798e-29
ENSG00000168539	ENSG00000236739.3	-0.436889	6.30779e-33	4.79708e-29
ENSG00000168539	ENSG00000151725.10	-0.436841	6.42109e-33	4.88324e-29
ENSG00000176884	ENSG00000115232.12	-0.436771	6.58789e-33	5.01009e-29
ENSG00000168539	ENSG00000047457.12	-0.436745	6.64981e-33	5.05718e-29
ENSG00000168539	ENSG00000172215.5	-0.43669	6.78458e-33	5.15967e-29
ENSG00000168539	ENSG00000251604.1	-0.436618	6.9658e-33	5.29749e-29
ENSG00000168539	ENSG00000090889.11	-0.436491	7.29739e-33	5.54966e-29
ENSG00000168539	ENSG00000162814.9	-0.43649	7.30081e-33	5.55227e-29
ENSG00000176884	ENSG00000226098.4	-0.436353	7.67615e-33	5.83771e-29
ENSG00000176884	ENSG00000260747.1	-0.436346	7.69607e-33	5.85286e-29
ENSG00000176884	ENSG00000279423.1	-0.436325	7.75647e-33	5.8988e-29
ENSG00000168539	ENSG00000079257.6	-0.4363	7.82766e-33	5.95294e-29
ENSG00000168539	ENSG00000235674.2	-0.436294	7.84341e-33	5.96491e-29
ENSG00000176884	ENSG00000177294.6	-0.436271	7.91144e-33	6.01665e-29
ENSG00000168539	ENSG00000242814.2	-0.436209	8.09146e-33	6.15356e-29
ENSG00000168539	ENSG00000171049.8	-0.436142	8.2928e-33	6.30667e-29
ENSG00000176884	ENSG00000089127.11	-0.436126	8.34273e-33	6.34464e-29
ENSG00000168539	ENSG00000224397.4	-0.43611	8.392e-33	6.38211e-29
ENSG00000168539	ENSG00000218358.2	-0.436084	8.47e-33	6.44143e-29
ENSG00000176884	ENSG00000219023.1	-0.436035	8.62558e-33	6.55975e-29
ENSG00000176884	ENSG00000228285.2	-0.435977	8.81012e-33	6.7001e-29
ENSG00000176884	ENSG00000147206.15	-0.435901	9.05745e-33	6.88819e-29
ENSG00000176884	ENSG00000109674.3	-0.43573	9.64246e-33	7.33309e-29
ENSG00000168539	ENSG00000070190.11	-0.435712	9.70392e-33	7.37983e-29
ENSG00000176884	ENSG00000213885.3	-0.435691	9.78064e-33	7.43818e-29
ENSG00000176884	ENSG00000248180.1	-0.43555	1.02964e-32	7.83045e-29
ENSG00000168539	ENSG00000249740.1	-0.435518	1.04155e-32	7.92098e-29
ENSG00000176884	ENSG00000234337.4	-0.435501	1.04806e-32	7.97051e-29
ENSG00000168539	ENSG00000178458.5	-0.435443	1.0707e-32	8.14266e-29
ENSG00000168539	ENSG00000137807.12	-0.435426	1.07725e-32	8.19246e-29
ENSG00000168539	ENSG00000256745.1	-0.435204	1.16827e-32	8.88468e-29
ENSG00000176884	ENSG00000142156.13	-0.434996	1.26002e-32	9.58243e-29
ENSG00000168539	ENSG00000182492.14	-0.434978	1.26831e-32	9.64549e-29
ENSG00000168539	ENSG00000255189.1	-0.434941	1.28546e-32	9.77591e-29
ENSG00000176884	ENSG00000101825.7	-0.434935	1.28851e-32	9.7991e-29
ENSG00000176884	ENSG00000236972.2	-0.434912	1.29956e-32	9.88313e-29
ENSG00000176884	ENSG00000213075.7	-0.434911	1.29989e-32	9.8857e-29
ENSG00000176884	ENSG00000129654.7	-0.434878	1.31577e-32	1.00064e-28
ENSG00000176884	ENSG00000213867.4	-0.434846	1.33093e-32	1.01217e-28
ENSG00000176884	ENSG00000249210.1	-0.434735	1.38607e-32	1.0541e-28
ENSG00000176884	ENSG00000259171.1	-0.434585	1.46384e-32	1.11325e-28
ENSG00000176884	ENSG00000248873.1	-0.434534	1.49115e-32	1.13402e-28
ENSG00000168539	ENSG00000167600.12	-0.434526	1.4952e-32	1.1371e-28
ENSG00000168539	ENSG00000233406.5	-0.434445	1.54012e-32	1.17126e-28
ENSG00000176884	ENSG00000274267.1	-0.434445	1.54038e-32	1.17146e-28
ENSG00000176884	ENSG00000171051.7	-0.434387	1.5728e-32	1.19612e-28
ENSG00000176884	ENSG00000235084.3	-0.434263	1.64542e-32	1.25134e-28
ENSG00000176884	ENSG00000272839.1	-0.434244	1.65672e-32	1.25994e-28
ENSG00000176884	ENSG00000233859.2	-0.434194	1.68703e-32	1.28299e-28
ENSG00000176884	ENSG00000227347.1	-0.434177	1.69747e-32	1.29093e-28
ENSG00000176884	ENSG00000149380.10	-0.434057	1.77318e-32	1.34851e-28
ENSG00000176884	ENSG00000253173.3	-0.433874	1.89532e-32	1.44139e-28
ENSG00000168539	ENSG00000104611.10	-0.433692	2.02446e-32	1.53961e-28
ENSG00000168539	ENSG00000213553.4	-0.433617	2.08023e-32	1.58202e-28
ENSG00000176884	ENSG00000078399.14	-0.433579	2.10927e-32	1.6041e-28
ENSG00000176884	ENSG00000134333.12	-0.43355	2.13171e-32	1.62116e-28
ENSG00000168539	ENSG00000162542.12	-0.433548	2.13334e-32	1.6224e-28
ENSG00000176884	ENSG00000125730.15	-0.433521	2.15396e-32	1.63809e-28
ENSG00000176884	ENSG00000228612.2	-0.433512	2.1615e-32	1.64382e-28
ENSG00000176884	ENSG00000268412.2	-0.433374	2.27252e-32	1.72825e-28
ENSG00000176884	ENSG00000237931.1	-0.433277	2.35317e-32	1.78959e-28
ENSG00000168539	ENSG00000171848.12	-0.433076	2.53102e-32	1.92484e-28
ENSG00000168539	ENSG00000166979.11	-0.433069	2.53742e-32	1.92971e-28
ENSG00000168539	ENSG00000196834.10	-0.43299	2.61094e-32	1.98562e-28
ENSG00000168539	ENSG00000218175.2	-0.432771	2.82668e-32	2.14969e-28
ENSG00000176884	ENSG00000220472.1	-0.432653	2.94959e-32	2.24316e-28
ENSG00000168539	ENSG00000258788.3	-0.432635	2.96933e-32	2.25818e-28
ENSG00000176884	ENSG00000270714.1	-0.432594	3.01382e-32	2.29201e-28
ENSG00000168539	ENSG00000229671.1	-0.432564	3.04631e-32	2.31672e-28
ENSG00000176884	ENSG00000259079.1	-0.43247	3.15199e-32	2.39709e-28
ENSG00000168539	ENSG00000272839.1	-0.432339	3.3042e-32	2.51284e-28
ENSG00000176884	ENSG00000214203.4	-0.432316	3.33224e-32	2.53417e-28
ENSG00000168539	ENSG00000238279.1	-0.432188	3.48992e-32	2.65408e-28
ENSG00000176884	ENSG00000121743.3	-0.432143	3.54689e-32	2.69741e-28
ENSG00000168539	ENSG00000251587.1	-0.432029	3.69517e-32	2.81017e-28
ENSG00000168539	ENSG00000087303.15	-0.431931	3.82809e-32	2.91126e-28
ENSG00000176884	ENSG00000197582.5	-0.431855	3.93543e-32	2.99289e-28
ENSG00000168539	ENSG00000184188.6	-0.431847	3.94571e-32	3.00071e-28
ENSG00000168539	ENSG00000261614.1	-0.431678	4.19366e-32	3.18928e-28
ENSG00000168539	ENSG00000128710.5	-0.431661	4.21959e-32	3.209e-28
ENSG00000176884	ENSG00000213280.2	-0.431606	4.30416e-32	3.27331e-28
ENSG00000168539	ENSG00000112299.7	-0.431605	4.30576e-32	3.27453e-28
ENSG00000176884	ENSG00000213430.6	-0.431594	4.32293e-32	3.28759e-28
ENSG00000176884	ENSG00000258451.1	-0.43158	4.34422e-32	3.30378e-28
ENSG00000168539	ENSG00000229453.2	-0.43158	4.34429e-32	3.30384e-28
ENSG00000168539	ENSG00000253525.1	-0.431577	4.34903e-32	3.30743e-28
ENSG00000176884	ENSG00000225475.1	-0.431504	4.46484e-32	3.39551e-28
ENSG00000176884	ENSG00000263266.2	-0.431424	4.59529e-32	3.49472e-28
ENSG00000168539	ENSG00000165891.14	-0.431418	4.60589e-32	3.50278e-28
ENSG00000176884	ENSG00000169253.3	-0.431365	4.69421e-32	3.56995e-28
ENSG00000168539	ENSG00000230581.2	-0.43124	4.91018e-32	3.73419e-28
ENSG00000168539	ENSG00000255397.1	-0.431239	4.91171e-32	3.73536e-28
ENSG00000176884	ENSG00000155307.16	-0.431239	4.91181e-32	3.73543e-28
ENSG00000176884	ENSG00000234241.1	-0.431171	5.03356e-32	3.82802e-28
ENSG00000176884	ENSG00000233503.1	-0.431121	5.12504e-32	3.89759e-28
ENSG00000168539	ENSG00000139329.4	-0.431066	5.22893e-32	3.9766e-28
ENSG00000176884	ENSG00000243517.1	-0.431047	5.26454e-32	4.00369e-28
ENSG00000168539	ENSG00000136235.14	-0.430979	5.39438e-32	4.10243e-28
ENSG00000176884	ENSG00000237730.1	-0.430971	5.41051e-32	4.11469e-28
ENSG00000168539	ENSG00000233668.1	-0.430916	5.5175e-32	4.19606e-28
ENSG00000176884	ENSG00000133136.4	-0.430884	5.5812e-32	4.24451e-28
ENSG00000168539	ENSG00000184260.5	-0.430862	5.62605e-32	4.27861e-28
ENSG00000168539	ENSG00000272382.1	-0.430858	5.63371e-32	4.28443e-28
ENSG00000168539	ENSG00000157335.18	-0.430857	5.63631e-32	4.28641e-28
ENSG00000168539	ENSG00000133106.13	-0.430855	5.64074e-32	4.28978e-28
ENSG00000176884	ENSG00000150337.12	-0.430824	5.7025e-32	4.33675e-28
ENSG00000176884	ENSG00000134222.15	-0.430789	5.77506e-32	4.39193e-28
ENSG00000176884	ENSG00000130635.14	-0.430784	5.78534e-32	4.39975e-28
ENSG00000176884	ENSG00000114013.14	-0.43078	5.79427e-32	4.40654e-28
ENSG00000176884	ENSG00000269640.4	-0.430666	6.03699e-32	4.59113e-28
ENSG00000176884	ENSG00000241061.3	-0.430613	6.1525e-32	4.67898e-28
ENSG00000176884	ENSG00000260187.1	-0.430594	6.19524e-32	4.71148e-28
ENSG00000176884	ENSG00000157765.10	-0.430464	6.49105e-32	4.93644e-28
ENSG00000176884	ENSG00000100368.12	-0.430404	6.63283e-32	5.04426e-28
ENSG00000168539	ENSG00000069011.14	-0.430376	6.69847e-32	5.09419e-28
ENSG00000168539	ENSG00000246430.5	-0.430342	6.78105e-32	5.15699e-28
ENSG00000176884	ENSG00000138755.5	-0.430321	6.83327e-32	5.1967e-28
ENSG00000176884	ENSG00000213449.2	-0.43021	7.11016e-32	5.40728e-28
ENSG00000176884	ENSG00000279965.1	-0.430184	7.17636e-32	5.45762e-28
ENSG00000168539	ENSG00000121743.3	-0.430086	7.43244e-32	5.65237e-28
ENSG00000176884	ENSG00000265273.1	-0.430083	7.44091e-32	5.65882e-28
ENSG00000176884	ENSG00000272202.1	-0.430051	7.52591e-32	5.72345e-28
ENSG00000176884	ENSG00000279252.1	-0.429997	7.67473e-32	5.83663e-28
ENSG00000176884	ENSG00000236592.5	-0.42996	7.77672e-32	5.91419e-28
ENSG00000168539	ENSG00000268157.1	-0.429882	7.99742e-32	6.08203e-28
ENSG00000176884	ENSG00000274447.1	-0.429871	8.02883e-32	6.10592e-28
ENSG00000168539	ENSG00000213275.2	-0.429856	8.07153e-32	6.1384e-28
ENSG00000176884	ENSG00000112077.14	-0.429785	8.27948e-32	6.29654e-28
ENSG00000168539	ENSG00000254503.1	-0.429756	8.3663e-32	6.36257e-28
ENSG00000176884	ENSG00000233287.1	-0.42975	8.38533e-32	6.37704e-28
ENSG00000176884	ENSG00000005073.5	-0.429715	8.48867e-32	6.45564e-28
ENSG00000176884	ENSG00000241680.1	-0.429655	8.67346e-32	6.59617e-28
ENSG00000176884	ENSG00000109113.16	-0.429602	8.84146e-32	6.72393e-28
ENSG00000176884	ENSG00000255737.2	-0.429586	8.8922e-32	6.76252e-28
ENSG00000168539	ENSG00000254893.4	-0.429572	8.93678e-32	6.79642e-28
ENSG00000168539	ENSG00000227173.1	-0.42957	8.94058e-32	6.79931e-28
ENSG00000176884	ENSG00000229400.1	-0.429523	9.09267e-32	6.91498e-28
ENSG00000168539	ENSG00000225422.4	-0.429475	9.24965e-32	7.03436e-28
ENSG00000168539	ENSG00000164251.4	-0.429434	9.3874e-32	7.13912e-28
ENSG00000176884	ENSG00000214255.5	-0.429358	9.64535e-32	7.33529e-28
ENSG00000168539	ENSG00000123685.7	-0.429292	9.87792e-32	7.51216e-28
ENSG00000176884	ENSG00000180785.8	-0.429174	1.03013e-31	7.83413e-28
ENSG00000176884	ENSG00000244482.8	-0.429153	1.03795e-31	7.89363e-28
ENSG00000176884	ENSG00000198502.5	-0.429134	1.04502e-31	7.9474e-28
ENSG00000168539	ENSG00000100097.10	-0.429094	1.05995e-31	8.06093e-28
ENSG00000176884	ENSG00000248415.1	-0.429094	1.06003e-31	8.06151e-28
ENSG00000168539	ENSG00000237350.1	-0.428964	1.11049e-31	8.44529e-28
ENSG00000176884	ENSG00000236330.1	-0.428933	1.12269e-31	8.53805e-28
ENSG00000176884	ENSG00000145287.9	-0.428914	1.13051e-31	8.59752e-28
ENSG00000176884	ENSG00000221818.7	-0.428845	1.15884e-31	8.81296e-28
ENSG00000168539	ENSG00000131401.10	-0.428834	1.16313e-31	8.84561e-28
ENSG00000168539	ENSG00000259004.1	-0.428822	1.16831e-31	8.88499e-28
ENSG00000176884	ENSG00000180758.11	-0.428635	1.24906e-31	9.4991e-28
ENSG00000168539	ENSG00000228347.1	-0.428558	1.28367e-31	9.76234e-28
ENSG00000176884	ENSG00000115009.10	-0.428423	1.34681e-31	1.02425e-27
ENSG00000176884	ENSG00000225496.1	-0.428411	1.3525e-31	1.02858e-27
ENSG00000176884	ENSG00000266989.1	-0.428324	1.39549e-31	1.06127e-27
ENSG00000176884	ENSG00000037965.5	-0.42826	1.42757e-31	1.08567e-27
ENSG00000176884	ENSG00000159708.16	-0.428155	1.482e-31	1.12706e-27
ENSG00000168539	ENSG00000123009.4	-0.428083	1.52046e-31	1.15631e-27
ENSG00000176884	ENSG00000180644.6	-0.428066	1.52988e-31	1.16348e-27
ENSG00000176884	ENSG00000179715.11	-0.428056	1.53489e-31	1.16728e-27
ENSG00000176884	ENSG00000127951.5	-0.427893	1.62654e-31	1.23699e-27
ENSG00000168539	ENSG00000150687.10	-0.427891	1.628e-31	1.23809e-27
ENSG00000176884	ENSG00000241399.5	-0.427823	1.6679e-31	1.26844e-27
ENSG00000168539	ENSG00000167646.12	-0.427774	1.69708e-31	1.29063e-27
ENSG00000168539	ENSG00000258427.3	-0.42776	1.7056e-31	1.29711e-27
ENSG00000168539	ENSG00000247311.2	-0.42768	1.7547e-31	1.33445e-27
ENSG00000168539	ENSG00000151650.7	-0.427672	1.7599e-31	1.33841e-27
ENSG00000168539	ENSG00000122642.9	-0.427606	1.8015e-31	1.37004e-27
ENSG00000176884	ENSG00000183022.5	-0.42759	1.81163e-31	1.37774e-27
ENSG00000176884	ENSG00000234115.2	-0.427574	1.82258e-31	1.38607e-27
ENSG00000176884	ENSG00000234080.3	-0.427488	1.87903e-31	1.429e-27
ENSG00000176884	ENSG00000233589.1	-0.427447	1.90623e-31	1.44969e-27
ENSG00000176884	ENSG00000226284.1	-0.427444	1.90847e-31	1.45139e-27
ENSG00000176884	ENSG00000268157.1	-0.427331	1.98695e-31	1.51107e-27
ENSG00000168539	ENSG00000198502.5	-0.427325	1.99065e-31	1.51389e-27
ENSG00000176884	ENSG00000267147.2	-0.427201	2.08038e-31	1.58213e-27
ENSG00000176884	ENSG00000235587.2	-0.427118	2.14296e-31	1.62972e-27
ENSG00000168539	ENSG00000133048.11	-0.427036	2.20632e-31	1.67791e-27
ENSG00000176884	ENSG00000164185.4	-0.426978	2.25166e-31	1.71238e-27
ENSG00000176884	ENSG00000014257.14	-0.426974	2.25508e-31	1.71499e-27
ENSG00000168539	ENSG00000115009.10	-0.426912	2.30519e-31	1.7531e-27
ENSG00000176884	ENSG00000269985.1	-0.426844	2.36105e-31	1.79558e-27
ENSG00000176884	ENSG00000246430.5	-0.426837	2.36705e-31	1.80014e-27
ENSG00000176884	ENSG00000237980.1	-0.42682	2.3818e-31	1.81136e-27
ENSG00000168539	ENSG00000185862.6	-0.426751	2.44074e-31	1.85618e-27
ENSG00000176884	ENSG00000272196.2	-0.426704	2.48125e-31	1.88699e-27
ENSG00000176884	ENSG00000166979.11	-0.426599	2.57586e-31	1.95894e-27
ENSG00000168539	ENSG00000110848.7	-0.426573	2.59975e-31	1.97711e-27
ENSG00000168539	ENSG00000136689.17	-0.426516	2.65293e-31	2.01755e-27
ENSG00000176884	ENSG00000113088.5	-0.426498	2.66975e-31	2.03034e-27
ENSG00000176884	ENSG00000251604.1	-0.426424	2.74057e-31	2.0842e-27
ENSG00000168539	ENSG00000109113.16	-0.426421	2.74364e-31	2.08654e-27
ENSG00000176884	ENSG00000144158.4	-0.426415	2.74943e-31	2.09094e-27
ENSG00000176884	ENSG00000175294.5	-0.426399	2.76489e-31	2.1027e-27
ENSG00000176884	ENSG00000236238.2	-0.426395	2.76892e-31	2.10576e-27
ENSG00000176884	ENSG00000234118.1	-0.42634	2.82266e-31	2.14663e-27
ENSG00000176884	ENSG00000185483.10	-0.426322	2.84152e-31	2.16097e-27
ENSG00000176884	ENSG00000238041.3	-0.426261	2.90315e-31	2.20784e-27
ENSG00000176884	ENSG00000197769.5	-0.426237	2.92798e-31	2.22673e-27
ENSG00000176884	ENSG00000212695.5	-0.426212	2.95353e-31	2.24616e-27
ENSG00000176884	ENSG00000213574.2	-0.426175	2.9927e-31	2.27595e-27
ENSG00000176884	ENSG00000128262.7	-0.426175	2.99331e-31	2.27641e-27
ENSG00000168539	ENSG00000266920.1	-0.426173	2.99482e-31	2.27756e-27
ENSG00000176884	ENSG00000173662.18	-0.426167	3.00147e-31	2.28262e-27
ENSG00000176884	ENSG00000163220.10	-0.426146	3.02395e-31	2.29972e-27
ENSG00000176884	ENSG00000236603.2	-0.4261	3.07319e-31	2.33716e-27
ENSG00000176884	ENSG00000179869.13	-0.426083	3.09232e-31	2.35171e-27
ENSG00000176884	ENSG00000106819.10	-0.426073	3.10335e-31	2.3601e-27
ENSG00000176884	ENSG00000226525.5	-0.426022	3.15931e-31	2.40266e-27
ENSG00000176884	ENSG00000124575.6	-0.42602	3.16156e-31	2.40436e-27
ENSG00000176884	ENSG00000124102.4	-0.426019	3.16263e-31	2.40518e-27
ENSG00000168539	ENSG00000049249.7	-0.425967	3.22097e-31	2.44955e-27
ENSG00000168539	ENSG00000089127.11	-0.425815	3.39888e-31	2.58485e-27
ENSG00000168539	ENSG00000244482.8	-0.425803	3.41347e-31	2.59594e-27
ENSG00000176884	ENSG00000162542.12	-0.425661	3.58867e-31	2.72918e-27
ENSG00000176884	ENSG00000171049.8	-0.425635	3.6228e-31	2.75514e-27
ENSG00000168539	ENSG00000164283.11	-0.425598	3.67005e-31	2.79107e-27
ENSG00000168539	ENSG00000220583.1	-0.425598	3.67063e-31	2.79152e-27
ENSG00000176884	ENSG00000273341.1	-0.425539	3.74766e-31	2.8501e-27
ENSG00000168539	ENSG00000108691.8	-0.425529	3.75988e-31	2.85939e-27
ENSG00000168539	ENSG00000214110.3	-0.425397	3.94057e-31	2.9968e-27
ENSG00000176884	ENSG00000007866.17	-0.425283	4.10206e-31	3.11962e-27
ENSG00000176884	ENSG00000187944.2	-0.425247	4.15413e-31	3.15922e-27
ENSG00000168539	ENSG00000101057.14	-0.42521	4.2088e-31	3.20079e-27
ENSG00000168539	ENSG00000204362.5	-0.425163	4.27819e-31	3.25357e-27
ENSG00000176884	ENSG00000213569.4	-0.42514	4.31303e-31	3.28006e-27
ENSG00000168539	ENSG00000105851.9	-0.425089	4.39148e-31	3.33972e-27
ENSG00000176884	ENSG00000153283.11	-0.425038	4.47217e-31	3.40108e-27
ENSG00000176884	ENSG00000258788.3	-0.42501	4.51609e-31	3.43449e-27
ENSG00000176884	ENSG00000162723.8	-0.424959	4.5987e-31	3.49731e-27
ENSG00000168539	ENSG00000142156.13	-0.424821	4.82727e-31	3.67114e-27
ENSG00000168539	ENSG00000234782.3	-0.424789	4.88184e-31	3.71264e-27
ENSG00000176884	ENSG00000239998.4	-0.424688	5.05854e-31	3.84702e-27
ENSG00000176884	ENSG00000234906.7	-0.42458	5.25519e-31	3.99657e-27
ENSG00000176884	ENSG00000236534.1	-0.424464	5.47382e-31	4.16284e-27
ENSG00000176884	ENSG00000108691.8	-0.424445	5.51069e-31	4.19088e-27
ENSG00000168539	ENSG00000197757.7	-0.424423	5.55206e-31	4.22234e-27
ENSG00000176884	ENSG00000229349.2	-0.424299	5.80005e-31	4.41094e-27
ENSG00000168539	ENSG00000217241.1	-0.424299	5.80048e-31	4.41127e-27
ENSG00000176884	ENSG00000104918.6	-0.424218	5.96871e-31	4.53921e-27
ENSG00000176884	ENSG00000254979.4	-0.424209	5.98779e-31	4.55371e-27
ENSG00000168539	ENSG00000230777.1	-0.424181	6.04657e-31	4.59841e-27
ENSG00000176884	ENSG00000232801.1	-0.424136	6.14306e-31	4.6718e-27
ENSG00000176884	ENSG00000253821.1	-0.424128	6.16014e-31	4.68479e-27
ENSG00000176884	ENSG00000234964.4	-0.424117	6.1841e-31	4.70301e-27
ENSG00000168539	ENSG00000134057.13	-0.424105	6.20982e-31	4.72257e-27
ENSG00000176884	ENSG00000101278.6	-0.424094	6.23431e-31	4.74119e-27
ENSG00000176884	ENSG00000217716.3	-0.424043	6.34559e-31	4.82582e-27
ENSG00000176884	ENSG00000129038.14	-0.423933	6.59743e-31	5.01735e-27
ENSG00000176884	ENSG00000167286.8	-0.423923	6.61936e-31	5.03402e-27
ENSG00000176884	ENSG00000213169.3	-0.423901	6.6713e-31	5.07352e-27
ENSG00000176884	ENSG00000166530.8	-0.423873	6.7369e-31	5.12341e-27
ENSG00000176884	ENSG00000111335.11	-0.423839	6.81821e-31	5.18525e-27
ENSG00000176884	ENSG00000243547.1	-0.42383	6.83908e-31	5.20112e-27
ENSG00000168539	ENSG00000276980.1	-0.423829	6.84231e-31	5.20357e-27
ENSG00000168539	ENSG00000155760.2	-0.423818	6.86758e-31	5.22279e-27
ENSG00000168539	ENSG00000229145.1	-0.423785	6.9479e-31	5.28388e-27
ENSG00000176884	ENSG00000102024.16	-0.423664	7.24878e-31	5.5127e-27
ENSG00000176884	ENSG00000213315.5	-0.423586	7.44963e-31	5.66545e-27
ENSG00000176884	ENSG00000263179.1	-0.423584	7.45611e-31	5.67037e-27
ENSG00000176884	ENSG00000136689.17	-0.42352	7.6243e-31	5.79828e-27
ENSG00000176884	ENSG00000215004.3	-0.423454	7.80345e-31	5.93452e-27
ENSG00000176884	ENSG00000237857.2	-0.423425	7.88475e-31	5.99635e-27
ENSG00000168539	ENSG00000180818.4	-0.423406	7.93678e-31	6.03592e-27
ENSG00000176884	ENSG00000258476.4	-0.423334	8.13961e-31	6.19017e-27
ENSG00000176884	ENSG00000216624.2	-0.423293	8.25691e-31	6.27938e-27
ENSG00000168539	ENSG00000225511.5	-0.423266	8.33437e-31	6.33829e-27
ENSG00000168539	ENSG00000145287.9	-0.423203	8.52084e-31	6.4801e-27
ENSG00000176884	ENSG00000249911.1	-0.423157	8.66116e-31	6.58681e-27
ENSG00000176884	ENSG00000258711.2	-0.423086	8.87747e-31	6.75132e-27
ENSG00000168539	ENSG00000258476.4	-0.423058	8.96435e-31	6.81738e-27
ENSG00000176884	ENSG00000233514.1	-0.422897	9.48613e-31	7.2142e-27
ENSG00000176884	ENSG00000224415.1	-0.422881	9.53915e-31	7.25452e-27
ENSG00000176884	ENSG00000236562.4	-0.422841	9.6732e-31	7.35647e-27
ENSG00000176884	ENSG00000170801.8	-0.422826	9.72452e-31	7.3955e-27
ENSG00000168539	ENSG00000139055.5	-0.422811	9.77596e-31	7.43461e-27
ENSG00000168539	ENSG00000122592.7	-0.422751	9.98095e-31	7.59051e-27
ENSG00000168539	ENSG00000256338.2	-0.422646	1.03557e-30	7.87552e-27
ENSG00000176884	ENSG00000088827.11	-0.422416	1.12221e-30	8.53441e-27
ENSG00000168539	ENSG00000167286.8	-0.422386	1.13406e-30	8.62455e-27
ENSG00000176884	ENSG00000249489.1	-0.422362	1.14354e-30	8.69662e-27
ENSG00000176884	ENSG00000243498.2	-0.422207	1.20706e-30	9.17967e-27
ENSG00000168539	ENSG00000233270.1	-0.422172	1.22197e-30	9.29305e-27
ENSG00000176884	ENSG00000243829.1	-0.422135	1.23786e-30	9.41394e-27
ENSG00000176884	ENSG00000231684.3	-0.422086	1.25923e-30	9.57642e-27
ENSG00000168539	ENSG00000130592.12	-0.42207	1.26634e-30	9.63049e-27
ENSG00000176884	ENSG00000198851.8	-0.421987	1.30357e-30	9.91362e-27
ENSG00000176884	ENSG00000248208.1	-0.421914	1.33718e-30	1.01693e-26
ENSG00000176884	ENSG00000240950.1	-0.421909	1.33972e-30	1.01885e-26
ENSG00000168539	ENSG00000258711.2	-0.421892	1.34765e-30	1.02489e-26
ENSG00000176884	ENSG00000196083.8	-0.421743	1.41935e-30	1.07942e-26
ENSG00000168539	ENSG00000237214.3	-0.42173	1.42562e-30	1.08418e-26
ENSG00000176884	ENSG00000223877.4	-0.421699	1.44138e-30	1.09617e-26
ENSG00000176884	ENSG00000219951.4	-0.421695	1.44334e-30	1.09766e-26
ENSG00000176884	ENSG00000238172.2	-0.421682	1.45008e-30	1.10278e-26
ENSG00000176884	ENSG00000225422.4	-0.421657	1.46271e-30	1.11239e-26
ENSG00000176884	ENSG00000232346.1	-0.421641	1.47051e-30	1.11832e-26
ENSG00000168539	ENSG00000248873.1	-0.421563	1.51118e-30	1.14925e-26
ENSG00000176884	ENSG00000268034.1	-0.421516	1.53637e-30	1.16841e-26
ENSG00000176884	ENSG00000215817.4	-0.421463	1.56505e-30	1.19022e-26
ENSG00000176884	ENSG00000236124.1	-0.421449	1.57242e-30	1.19582e-26
ENSG00000176884	ENSG00000223823.1	-0.421365	1.61927e-30	1.23146e-26
ENSG00000176884	ENSG00000244422.3	-0.421339	1.63409e-30	1.24273e-26
ENSG00000176884	ENSG00000231120.3	-0.421327	1.64091e-30	1.24791e-26
ENSG00000176884	ENSG00000250526.1	-0.421309	1.65071e-30	1.25537e-26
ENSG00000176884	ENSG00000148926.8	-0.421306	1.65258e-30	1.25679e-26
ENSG00000176884	ENSG00000236565.3	-0.42121	1.70897e-30	1.29967e-26
ENSG00000176884	ENSG00000077984.5	-0.421159	1.7396e-30	1.32297e-26
ENSG00000168539	ENSG00000213793.4	-0.421146	1.74754e-30	1.329e-26
ENSG00000176884	ENSG00000236480.1	-0.421112	1.76839e-30	1.34486e-26
ENSG00000176884	ENSG00000228499.1	-0.421094	1.7792e-30	1.35308e-26
ENSG00000168539	ENSG00000185834.10	-0.421091	1.78134e-30	1.35471e-26
ENSG00000176884	ENSG00000106565.16	-0.421038	1.81444e-30	1.37988e-26
ENSG00000176884	ENSG00000213326.4	-0.420957	1.86602e-30	1.41911e-26
ENSG00000176884	ENSG00000268812.3	-0.420902	1.90181e-30	1.44633e-26
ENSG00000168539	ENSG00000213857.3	-0.420898	1.90474e-30	1.44856e-26
ENSG00000176884	ENSG00000173947.12	-0.420896	1.90628e-30	1.44973e-26
ENSG00000176884	ENSG00000279461.1	-0.420759	1.99905e-30	1.52028e-26
ENSG00000168539	ENSG00000198851.8	-0.420541	2.15606e-30	1.63968e-26
ENSG00000168539	ENSG00000113088.5	-0.420408	2.25825e-30	1.7174e-26
ENSG00000176884	ENSG00000235251.2	-0.420343	2.30937e-30	1.75628e-26
ENSG00000176884	ENSG00000242457.1	-0.420334	2.31652e-30	1.76172e-26
ENSG00000176884	ENSG00000227890.1	-0.420248	2.38729e-30	1.81553e-26
ENSG00000168539	ENSG00000243517.1	-0.420185	2.43997e-30	1.8556e-26
ENSG00000168539	ENSG00000167900.10	-0.420127	2.48935e-30	1.89315e-26
ENSG00000168539	ENSG00000279965.1	-0.420121	2.49434e-30	1.89694e-26
ENSG00000168539	ENSG00000259051.1	-0.420039	2.5665e-30	1.95183e-26
ENSG00000168539	ENSG00000228974.5	-0.419913	2.68074e-30	2.0387e-26
ENSG00000168539	ENSG00000228612.2	-0.419893	2.69984e-30	2.05323e-26
ENSG00000168539	ENSG00000166803.9	-0.419809	2.77892e-30	2.11337e-26
ENSG00000176884	ENSG00000236811.1	-0.419736	2.85029e-30	2.16765e-26
ENSG00000168539	ENSG00000197582.5	-0.419721	2.86564e-30	2.17932e-26
ENSG00000176884	ENSG00000238279.1	-0.41972	2.86612e-30	2.17969e-26
ENSG00000176884	ENSG00000256737.1	-0.419712	2.87395e-30	2.18564e-26
ENSG00000176884	ENSG00000219986.2	-0.419699	2.88709e-30	2.19563e-26
ENSG00000176884	ENSG00000237264.4	-0.41962	2.96727e-30	2.25661e-26
ENSG00000176884	ENSG00000238150.1	-0.419595	2.99324e-30	2.27636e-26
ENSG00000176884	ENSG00000187942.10	-0.419565	3.02387e-30	2.29965e-26
ENSG00000176884	ENSG00000232004.1	-0.419528	3.06354e-30	2.32982e-26
ENSG00000176884	ENSG00000170689.9	-0.419517	3.07517e-30	2.33866e-26
ENSG00000176884	ENSG00000223540.1	-0.41951	3.08199e-30	2.34385e-26
ENSG00000176884	ENSG00000008323.14	-0.41951	3.08212e-30	2.34395e-26
ENSG00000168539	ENSG00000213885.3	-0.419492	3.10133e-30	2.35856e-26
ENSG00000176884	ENSG00000223668.1	-0.419415	3.1857e-30	2.42273e-26
ENSG00000176884	ENSG00000251151.2	-0.419373	3.23209e-30	2.458e-26
ENSG00000176884	ENSG00000228938.3	-0.419312	3.30041e-30	2.50996e-26
ENSG00000168539	ENSG00000232702.3	-0.419261	3.3596e-30	2.55498e-26
ENSG00000168539	ENSG00000105352.9	-0.419258	3.36298e-30	2.55755e-26
ENSG00000168539	ENSG00000206199.8	-0.419199	3.43197e-30	2.61002e-26
ENSG00000176884	ENSG00000112299.7	-0.419134	3.51071e-30	2.6699e-26
ENSG00000168539	ENSG00000188219.13	-0.419003	3.67324e-30	2.7935e-26
ENSG00000176884	ENSG00000224959.1	-0.418886	3.82419e-30	2.9083e-26
ENSG00000168539	ENSG00000073792.14	-0.418842	3.88229e-30	2.95248e-26
ENSG00000176884	ENSG00000272382.1	-0.418798	3.94255e-30	2.99831e-26
ENSG00000176884	ENSG00000261557.1	-0.418785	3.95982e-30	3.01145e-26
ENSG00000176884	ENSG00000231878.1	-0.418755	4.00085e-30	3.04264e-26
ENSG00000168539	ENSG00000228651.1	-0.418726	4.04099e-30	3.07318e-26
ENSG00000176884	ENSG00000162814.9	-0.418726	4.04177e-30	3.07376e-26
ENSG00000176884	ENSG00000233846.2	-0.418668	4.12292e-30	3.13548e-26
ENSG00000176884	ENSG00000233876.2	-0.418639	4.16462e-30	3.1672e-26
ENSG00000168539	ENSG00000119535.16	-0.418542	4.30646e-30	3.27506e-26
ENSG00000168539	ENSG00000153283.11	-0.418539	4.31073e-30	3.27831e-26
ENSG00000168539	ENSG00000242299.1	-0.418501	4.36794e-30	3.32182e-26
ENSG00000176884	ENSG00000234797.5	-0.418484	4.39309e-30	3.34095e-26
ENSG00000168539	ENSG00000274447.1	-0.418476	4.40573e-30	3.35056e-26
ENSG00000168539	ENSG00000183734.4	-0.418415	4.49927e-30	3.4217e-26
ENSG00000176884	ENSG00000260326.1	-0.418308	4.66793e-30	3.54996e-26
ENSG00000168539	ENSG00000089685.13	-0.418276	4.72036e-30	3.58983e-26
ENSG00000176884	ENSG00000237632.3	-0.41825	4.76229e-30	3.62172e-26
ENSG00000176884	ENSG00000255189.1	-0.418231	4.7941e-30	3.64592e-26
ENSG00000168539	ENSG00000162840.4	-0.418217	4.8165e-30	3.66295e-26
ENSG00000176884	ENSG00000268222.1	-0.418198	4.84799e-30	3.6869e-26
ENSG00000176884	ENSG00000213201.3	-0.418187	4.86697e-30	3.70133e-26
ENSG00000168539	ENSG00000148735.13	-0.418131	4.96095e-30	3.7728e-26
ENSG00000168539	ENSG00000235354.1	-0.418106	5.005e-30	3.8063e-26
ENSG00000176884	ENSG00000183486.11	-0.418078	5.05357e-30	3.84324e-26
ENSG00000168539	ENSG00000258153.1	-0.418069	5.06935e-30	3.85524e-26
ENSG00000176884	ENSG00000177197.7	-0.418055	5.09229e-30	3.87269e-26
ENSG00000168539	ENSG00000178999.11	-0.418006	5.18016e-30	3.93951e-26
ENSG00000176884	ENSG00000243859.3	-0.418002	5.18617e-30	3.94409e-26
ENSG00000176884	ENSG00000248626.1	-0.417982	5.22306e-30	3.97214e-26
ENSG00000176884	ENSG00000106511.5	-0.417867	5.43436e-30	4.13283e-26
ENSG00000176884	ENSG00000248780.1	-0.417842	5.47968e-30	4.16729e-26
ENSG00000176884	ENSG00000026751.15	-0.417841	5.48155e-30	4.16872e-26
ENSG00000168539	ENSG00000185483.10	-0.417833	5.49786e-30	4.18112e-26
ENSG00000168539	ENSG00000128709.11	-0.417794	5.57095e-30	4.2367e-26
ENSG00000176884	ENSG00000141574.6	-0.417764	5.62879e-30	4.28069e-26
ENSG00000176884	ENSG00000229207.1	-0.417732	5.69137e-30	4.32829e-26
ENSG00000176884	ENSG00000258675.1	-0.417637	5.88035e-30	4.472e-26
ENSG00000176884	ENSG00000179157.4	-0.417588	5.98178e-30	4.54915e-26
ENSG00000168539	ENSG00000117122.12	-0.417547	6.06613e-30	4.6133e-26
ENSG00000176884	ENSG00000223460.1	-0.417431	6.31267e-30	4.80078e-26
ENSG00000168539	ENSG00000213296.4	-0.417408	6.36201e-30	4.83831e-26
ENSG00000168539	ENSG00000077984.5	-0.417397	6.3871e-30	4.85739e-26
ENSG00000176884	ENSG00000259790.1	-0.417386	6.41023e-30	4.87498e-26
ENSG00000176884	ENSG00000240036.4	-0.41734	6.51343e-30	4.95346e-26
ENSG00000176884	ENSG00000235354.1	-0.417324	6.54863e-30	4.98023e-26
ENSG00000176884	ENSG00000254023.1	-0.417312	6.57652e-30	5.00144e-26
ENSG00000176884	ENSG00000257790.1	-0.417202	6.82946e-30	5.1938e-26
ENSG00000176884	ENSG00000225094.3	-0.417108	7.05284e-30	5.36368e-26
ENSG00000168539	ENSG00000234118.1	-0.417106	7.0587e-30	5.36814e-26
ENSG00000168539	ENSG00000270933.1	-0.417073	7.13913e-30	5.42931e-26
ENSG00000176884	ENSG00000277358.1	-0.417038	7.22509e-30	5.49468e-26
ENSG00000168539	ENSG00000230216.1	-0.416975	7.38238e-30	5.6143e-26
ENSG00000168539	ENSG00000228630.4	-0.41693	7.49638e-30	5.70099e-26
ENSG00000168539	ENSG00000149131.14	-0.416881	7.62356e-30	5.79772e-26
ENSG00000168539	ENSG00000231940.1	-0.416819	7.78892e-30	5.92348e-26
ENSG00000168539	ENSG00000149948.12	-0.416794	7.85467e-30	5.97348e-26
ENSG00000168539	ENSG00000254387.1	-0.416782	7.8879e-30	5.99875e-26
ENSG00000176884	ENSG00000276924.1	-0.41671	8.08359e-30	6.14757e-26
ENSG00000176884	ENSG00000244192.1	-0.416695	8.12468e-30	6.17882e-26
ENSG00000168539	ENSG00000258675.1	-0.416663	8.21631e-30	6.2485e-26
ENSG00000168539	ENSG00000128262.7	-0.416639	8.28432e-30	6.30023e-26
ENSG00000176884	ENSG00000159217.8	-0.416638	8.28664e-30	6.30199e-26
ENSG00000176884	ENSG00000229133.1	-0.416622	8.33061e-30	6.33543e-26
ENSG00000176884	ENSG00000225573.4	-0.416516	8.6388e-30	6.56981e-26
ENSG00000168539	ENSG00000231848.1	-0.416465	8.79367e-30	6.68758e-26
ENSG00000176884	ENSG00000225511.5	-0.416356	9.12721e-30	6.94125e-26
ENSG00000168539	ENSG00000230897.1	-0.416321	9.23696e-30	7.02471e-26
ENSG00000176884	ENSG00000236319.2	-0.416304	9.28929e-30	7.06451e-26
ENSG00000176884	ENSG00000169248.11	-0.416251	9.46046e-30	7.19468e-26
ENSG00000176884	ENSG00000240087.3	-0.416195	9.64422e-30	7.33443e-26
ENSG00000168539	ENSG00000173762.6	-0.416158	9.76477e-30	7.42611e-26
ENSG00000168539	ENSG00000211697.3	-0.416121	9.89251e-30	7.52325e-26
ENSG00000168539	ENSG00000213846.4	-0.416097	9.97215e-30	7.58382e-26
ENSG00000176884	ENSG00000259004.1	-0.416054	1.01213e-29	7.69726e-26
ENSG00000176884	ENSG00000244076.1	-0.416045	1.01513e-29	7.72008e-26
ENSG00000176884	ENSG00000257907.2	-0.415926	1.05717e-29	8.03974e-26
ENSG00000176884	ENSG00000251453.1	-0.415838	1.08961e-29	8.28649e-26
ENSG00000168539	ENSG00000234241.1	-0.415838	1.08974e-29	8.28746e-26
ENSG00000176884	ENSG00000172243.16	-0.415801	1.1034e-29	8.39137e-26
ENSG00000168539	ENSG00000249911.1	-0.415765	1.11709e-29	8.49547e-26
ENSG00000168539	ENSG00000270980.1	-0.415755	1.12109e-29	8.52589e-26
ENSG00000176884	ENSG00000099953.8	-0.415714	1.13662e-29	8.64402e-26
ENSG00000176884	ENSG00000228847.1	-0.415632	1.16909e-29	8.8909e-26
ENSG00000176884	ENSG00000110848.7	-0.415551	1.20165e-29	9.13857e-26
ENSG00000168539	ENSG00000111341.8	-0.415551	1.20175e-29	9.1393e-26
ENSG00000176884	ENSG00000049249.7	-0.415535	1.20855e-29	9.19104e-26
ENSG00000176884	ENSG00000243445.1	-0.415499	1.22349e-29	9.30462e-26
ENSG00000168539	ENSG00000169495.4	-0.415476	1.23275e-29	9.37509e-26
ENSG00000176884	ENSG00000228665.2	-0.415429	1.25286e-29	9.52802e-26
ENSG00000176884	ENSG00000233839.1	-0.415403	1.26426e-29	9.61471e-26
ENSG00000176884	ENSG00000183734.4	-0.415381	1.27354e-29	9.6853e-26
ENSG00000176884	ENSG00000239917.3	-0.415287	1.31493e-29	1.00001e-25
ENSG00000176884	ENSG00000224953.1	-0.415245	1.3339e-29	1.01443e-25
ENSG00000168539	ENSG00000133110.13	-0.415145	1.38012e-29	1.04958e-25
ENSG00000168539	ENSG00000250133.2	-0.41513	1.38719e-29	1.05496e-25
ENSG00000176884	ENSG00000250568.1	-0.415075	1.41377e-29	1.07517e-25
ENSG00000168539	ENSG00000219023.1	-0.414918	1.49161e-29	1.13437e-25
ENSG00000168539	ENSG00000258645.2	-0.414909	1.49576e-29	1.13752e-25
ENSG00000176884	ENSG00000272282.1	-0.414885	1.5081e-29	1.14691e-25
ENSG00000176884	ENSG00000177776.8	-0.414836	1.53338e-29	1.16613e-25
ENSG00000168539	ENSG00000224831.3	-0.414829	1.53728e-29	1.1691e-25
ENSG00000176884	ENSG00000238103.4	-0.414824	1.53998e-29	1.17116e-25
ENSG00000176884	ENSG00000230356.1	-0.414794	1.55561e-29	1.18304e-25
ENSG00000168539	ENSG00000169508.6	-0.414714	1.59857e-29	1.21571e-25
ENSG00000176884	ENSG00000223361.5	-0.4147	1.60634e-29	1.22162e-25
ENSG00000168539	ENSG00000169083.14	-0.414663	1.62645e-29	1.23691e-25
ENSG00000176884	ENSG00000241473.1	-0.41463	1.6451e-29	1.2511e-25
ENSG00000168539	ENSG00000106565.16	-0.41459	1.66749e-29	1.26812e-25
ENSG00000168539	ENSG00000111335.11	-0.414503	1.71796e-29	1.30651e-25
ENSG00000168539	ENSG00000255909.1	-0.414487	1.72696e-29	1.31335e-25
ENSG00000176884	ENSG00000235385.1	-0.414485	1.72806e-29	1.31419e-25
ENSG00000168539	ENSG00000213075.7	-0.414458	1.74432e-29	1.32656e-25
ENSG00000176884	ENSG00000174371.15	-0.414442	1.75397e-29	1.33389e-25
ENSG00000168539	ENSG00000136315.4	-0.414429	1.76178e-29	1.33983e-25
ENSG00000176884	ENSG00000239776.2	-0.414425	1.76384e-29	1.3414e-25
ENSG00000176884	ENSG00000230629.2	-0.41436	1.80331e-29	1.37142e-25
ENSG00000176884	ENSG00000000971.14	-0.414315	1.83084e-29	1.39236e-25
ENSG00000176884	ENSG00000246985.6	-0.414259	1.86609e-29	1.41916e-25
ENSG00000176884	ENSG00000226798.1	-0.41424	1.87825e-29	1.42841e-25
ENSG00000176884	ENSG00000213793.4	-0.414195	1.90747e-29	1.45063e-25
ENSG00000168539	ENSG00000251453.1	-0.414187	1.91262e-29	1.45455e-25
ENSG00000168539	ENSG00000115232.12	-0.41414	1.94302e-29	1.47767e-25
ENSG00000176884	ENSG00000230838.1	-0.414071	1.98939e-29	1.51293e-25
ENSG00000176884	ENSG00000220105.2	-0.41406	1.99669e-29	1.51848e-25
ENSG00000176884	ENSG00000135114.11	-0.414054	2.00099e-29	1.52175e-25
ENSG00000176884	ENSG00000159184.7	-0.413973	2.05706e-29	1.5644e-25
ENSG00000168539	ENSG00000138755.5	-0.413849	2.14544e-29	1.63161e-25
ENSG00000176884	ENSG00000268223.2	-0.413798	2.18261e-29	1.65987e-25
ENSG00000176884	ENSG00000236680.1	-0.413698	2.2583e-29	1.71744e-25
ENSG00000176884	ENSG00000254244.1	-0.413632	2.30883e-29	1.75586e-25
ENSG00000168539	ENSG00000269985.1	-0.413595	2.33862e-29	1.77852e-25
ENSG00000176884	ENSG00000225022.1	-0.413575	2.35389e-29	1.79013e-25
ENSG00000176884	ENSG00000142089.14	-0.413571	2.35764e-29	1.79299e-25
ENSG00000168539	ENSG00000234906.7	-0.413503	2.41264e-29	1.83482e-25
ENSG00000176884	ENSG00000227850.1	-0.41346	2.44747e-29	1.8613e-25
ENSG00000176884	ENSG00000206199.8	-0.413446	2.45968e-29	1.87059e-25
ENSG00000168539	ENSG00000180758.11	-0.41336	2.53203e-29	1.92561e-25
ENSG00000176884	ENSG00000228169.3	-0.413346	2.54429e-29	1.93493e-25
ENSG00000176884	ENSG00000241007.1	-0.413335	2.5534e-29	1.94186e-25
ENSG00000168539	ENSG00000145040.3	-0.413294	2.58936e-29	1.96921e-25
ENSG00000168539	ENSG00000226098.4	-0.413262	2.61783e-29	1.99086e-25
ENSG00000168539	ENSG00000122176.10	-0.413141	2.72722e-29	2.07405e-25
ENSG00000176884	ENSG00000242477.1	-0.413141	2.72767e-29	2.07439e-25
ENSG00000176884	ENSG00000272491.1	-0.4131	2.76536e-29	2.10306e-25
ENSG00000168539	ENSG00000226791.5	-0.412963	2.89634e-29	2.20267e-25
ENSG00000176884	ENSG00000227621.1	-0.412873	2.98641e-29	2.27117e-25
ENSG00000168539	ENSG00000270714.1	-0.412864	2.9955e-29	2.27808e-25
ENSG00000168539	ENSG00000241061.3	-0.41283	3.02963e-29	2.30403e-25
ENSG00000168539	ENSG00000228462.1	-0.4128	3.06099e-29	2.32788e-25
ENSG00000168539	ENSG00000235013.1	-0.412794	3.06742e-29	2.33277e-25
ENSG00000168539	ENSG00000006747.13	-0.412794	3.06757e-29	2.33288e-25
ENSG00000176884	ENSG00000235297.3	-0.412714	3.15165e-29	2.39683e-25
ENSG00000176884	ENSG00000245205.3	-0.412541	3.34112e-29	2.54092e-25
ENSG00000168539	ENSG00000165105.9	-0.412518	3.36656e-29	2.56027e-25
ENSG00000176884	ENSG00000270933.1	-0.412341	3.57447e-29	2.71839e-25
ENSG00000168539	ENSG00000213080.3	-0.412306	3.61702e-29	2.75074e-25
ENSG00000176884	ENSG00000218502.3	-0.4123	3.62451e-29	2.75644e-25
ENSG00000176884	ENSG00000081237.17	-0.412261	3.67285e-29	2.7932e-25
ENSG00000168539	ENSG00000170379.18	-0.412224	3.71839e-29	2.82784e-25
ENSG00000168539	ENSG00000213851.3	-0.412221	3.72253e-29	2.83098e-25
ENSG00000176884	ENSG00000228844.1	-0.412129	3.83984e-29	2.9202e-25
ENSG00000176884	ENSG00000214222.2	-0.412119	3.85248e-29	2.92981e-25
ENSG00000176884	ENSG00000271590.1	-0.412042	3.95477e-29	3.0076e-25
ENSG00000168539	ENSG00000229400.1	-0.412034	3.96524e-29	3.01556e-25
ENSG00000168539	ENSG00000144031.10	-0.411941	4.09108e-29	3.11127e-25
ENSG00000176884	ENSG00000072110.12	-0.411889	4.16327e-29	3.16616e-25
ENSG00000168539	ENSG00000159167.10	-0.411887	4.16596e-29	3.16822e-25
ENSG00000176884	ENSG00000171631.13	-0.41185	4.21809e-29	3.20786e-25
ENSG00000168539	ENSG00000123485.10	-0.411767	4.33886e-29	3.2997e-25
ENSG00000168539	ENSG00000235174.1	-0.411708	4.42623e-29	3.36615e-25
ENSG00000176884	ENSG00000215093.3	-0.411685	4.45955e-29	3.39149e-25
ENSG00000176884	ENSG00000244251.1	-0.411642	4.52509e-29	3.44133e-25
ENSG00000168539	ENSG00000234337.4	-0.41156	4.65137e-29	3.53737e-25
ENSG00000176884	ENSG00000162692.9	-0.411498	4.75056e-29	3.6128e-25
ENSG00000176884	ENSG00000213750.4	-0.411467	4.80046e-29	3.65075e-25
ENSG00000176884	ENSG00000230956.2	-0.411356	4.98316e-29	3.7897e-25
ENSG00000176884	ENSG00000228834.1	-0.411288	5.09813e-29	3.87713e-25
ENSG00000176884	ENSG00000176826.14	-0.411083	5.46114e-29	4.1532e-25
ENSG00000176884	ENSG00000187537.12	-0.411073	5.48055e-29	4.16796e-25
ENSG00000168539	ENSG00000160654.8	-0.410989	5.63634e-29	4.28643e-25
ENSG00000176884	ENSG00000228718.1	-0.410971	5.67081e-29	4.31265e-25
ENSG00000176884	ENSG00000225246.1	-0.410964	5.68548e-29	4.32381e-25
ENSG00000168539	ENSG00000150637.7	-0.41095	5.71159e-29	4.34367e-25
ENSG00000168539	ENSG00000186973.9	-0.410799	6.00879e-29	4.56968e-25
ENSG00000168539	ENSG00000250444.1	-0.410699	6.21467e-29	4.72626e-25
ENSG00000168539	ENSG00000104918.6	-0.410665	6.28476e-29	4.77956e-25
ENSG00000176884	ENSG00000228218.1	-0.410659	6.29871e-29	4.79017e-25
ENSG00000168539	ENSG00000272282.1	-0.410639	6.34132e-29	4.82257e-25
ENSG00000176884	ENSG00000172638.11	-0.410584	6.45849e-29	4.91168e-25
ENSG00000176884	ENSG00000249921.2	-0.410533	6.56978e-29	4.99631e-25
ENSG00000176884	ENSG00000232699.3	-0.410518	6.604e-29	5.02235e-25
ENSG00000176884	ENSG00000240023.1	-0.410454	6.74662e-29	5.1308e-25
ENSG00000176884	ENSG00000105374.8	-0.410395	6.88178e-29	5.23359e-25
ENSG00000168539	ENSG00000205929.8	-0.410391	6.89021e-29	5.24e-25
ENSG00000168539	ENSG00000234093.3	-0.410266	7.18543e-29	5.46452e-25
ENSG00000168539	ENSG00000188396.3	-0.410251	7.2224e-29	5.49263e-25
ENSG00000176884	ENSG00000249464.4	-0.410167	7.42978e-29	5.65035e-25
ENSG00000168539	ENSG00000088827.11	-0.410155	7.45811e-29	5.6719e-25
ENSG00000176884	ENSG00000244681.1	-0.410127	7.52886e-29	5.7257e-25
ENSG00000168539	ENSG00000180638.16	-0.410112	7.56827e-29	5.75567e-25
ENSG00000176884	ENSG00000250144.1	-0.4101	7.59691e-29	5.77745e-25
ENSG00000176884	ENSG00000107159.11	-0.409962	7.9567e-29	6.05107e-25
ENSG00000168539	ENSG00000268812.3	-0.409824	8.33304e-29	6.33728e-25
ENSG00000176884	ENSG00000237668.1	-0.409812	8.36736e-29	6.36338e-25
ENSG00000168539	ENSG00000224746.1	-0.409803	8.39112e-29	6.38145e-25
ENSG00000168539	ENSG00000179172.8	-0.409778	8.46199e-29	6.43535e-25
ENSG00000168539	ENSG00000225475.1	-0.409749	8.54642e-29	6.49955e-25
ENSG00000168539	ENSG00000272908.1	-0.409749	8.54677e-29	6.49982e-25
ENSG00000176884	ENSG00000260057.4	-0.409713	8.64968e-29	6.57808e-25
ENSG00000168539	ENSG00000237931.1	-0.409703	8.67823e-29	6.59979e-25
ENSG00000168539	ENSG00000078098.12	-0.409697	8.69634e-29	6.61356e-25
ENSG00000176884	ENSG00000204194.1	-0.409636	8.87615e-29	6.75031e-25
ENSG00000176884	ENSG00000230580.1	-0.409606	8.96362e-29	6.81684e-25
ENSG00000168539	ENSG00000279274.1	-0.40958	9.0417e-29	6.87621e-25
ENSG00000176884	ENSG00000232883.1	-0.409551	9.13175e-29	6.9447e-25
ENSG00000176884	ENSG00000236801.1	-0.409521	9.22295e-29	7.01406e-25
ENSG00000176884	ENSG00000240776.1	-0.4094	9.60469e-29	7.30436e-25
ENSG00000176884	ENSG00000144031.10	-0.409399	9.60746e-29	7.30647e-25
ENSG00000168539	ENSG00000165923.14	-0.40938	9.66906e-29	7.35332e-25
[truncated: 6,261 more rows]
