# Supplementary material for: Deciphering of Adult Glioma Vulnerabilities through Expression Pattern Analysis of GABA, Glutamate and Calcium Neurotransmitter Genes
Source: J Pers Med. 2022 Apr 14;12(4):633. doi: 10.3390/jpm12040633 (PMC9030730; doi:10.3390/jpm12040633)
Supplement: Supplementary file 1 [file jpm-12-00633-s001.zip › supplementary_data_tableS7_immune_cell_type_enrichment.xlsx]

## Sheet: CIBERSORT_pval
Supplementary data Table S7. Comparison of immune cell type enrichment among NT-1-4 glioma clusters generated by the CIBERSORT analysis tool.
cell_type	cluster1	cluster2	pvalue
B_cell_naive	NT-4	NT-1	8.43143e-06
B_cell_naive	NT-4	NT-2	0.00500091
B_cell_naive	NT-4	NT-3	0.0225055
B_cell_naive	NT-1	NT-2	3.22062e-10
B_cell_naive	NT-1	NT-3	0.39508
B_cell_naive	NT-2	NT-3	8.25666e-05
B_cell_memory	NT-4	NT-1	0.000548766
B_cell_memory	NT-4	NT-2	0.000128643
B_cell_memory	NT-4	NT-3	0.167674
B_cell_memory	NT-1	NT-2	2.80809e-10
B_cell_memory	NT-1	NT-3	0.179893
B_cell_memory	NT-2	NT-3	0.000149661
B_cell_plasma	NT-4	NT-1	2.3323e-35
B_cell_plasma	NT-4	NT-2	9.72743e-09
B_cell_plasma	NT-4	NT-3	7.64243e-07
B_cell_plasma	NT-1	NT-2	1.72511e-42
B_cell_plasma	NT-1	NT-3	2.41908e-09
B_cell_plasma	NT-2	NT-3	6.81307e-14
T_cell_CD8+	NT-4	NT-1	0.0238409
T_cell_CD8+	NT-4	NT-2	2.01001e-08
T_cell_CD8+	NT-4	NT-3	0.00142677
T_cell_CD8+	NT-1	NT-2	0.000756848
T_cell_CD8+	NT-1	NT-3	0.162234
T_cell_CD8+	NT-2	NT-3	0.210892
T_cell_CD4+_naive	NT-4	NT-1	0.00208907
T_cell_CD4+_naive	NT-4	NT-2	2.33723e-11
T_cell_CD4+_naive	NT-4	NT-3	0.000111211
T_cell_CD4+_naive	NT-1	NT-2	2.10683e-19
T_cell_CD4+_naive	NT-1	NT-3	0.174209
T_cell_CD4+_naive	NT-2	NT-3	1.66793e-20
T_cell_CD4+_memory_resting	NT-4	NT-1	1.03024e-13
T_cell_CD4+_memory_resting	NT-4	NT-2	0.000133318
T_cell_CD4+_memory_resting	NT-4	NT-3	1.93445e-07
T_cell_CD4+_memory_resting	NT-1	NT-2	9.90683e-23
T_cell_CD4+_memory_resting	NT-1	NT-3	0.955066
T_cell_CD4+_memory_resting	NT-2	NT-3	1.57494e-12
T_cell_CD4+_memory_activated	NT-4	NT-1	0.389309
T_cell_CD4+_memory_activated	NT-4	NT-2	0.00207736
T_cell_CD4+_memory_activated	NT-4	NT-3	0.113532
T_cell_CD4+_memory_activated	NT-1	NT-2	0.0023485
T_cell_CD4+_memory_activated	NT-1	NT-3	0.0418782
T_cell_CD4+_memory_activated	NT-2	NT-3	0.312061
T_cell_follicular_helper	NT-4	NT-1	4.30275e-08
T_cell_follicular_helper	NT-4	NT-2	0.778775
T_cell_follicular_helper	NT-4	NT-3	2.12196e-09
T_cell_follicular_helper	NT-1	NT-2	1.97745e-07
T_cell_follicular_helper	NT-1	NT-3	0.0970371
T_cell_follicular_helper	NT-2	NT-3	6.17114e-09
T_cell_regulatory_(Tregs)	NT-4	NT-1	1.48024e-11
T_cell_regulatory_(Tregs)	NT-4	NT-2	2.51504e-07
T_cell_regulatory_(Tregs)	NT-4	NT-3	0.593284
T_cell_regulatory_(Tregs)	NT-1	NT-2	9.70329e-23
T_cell_regulatory_(Tregs)	NT-1	NT-3	2.46819e-08
T_cell_regulatory_(Tregs)	NT-2	NT-3	8.55709e-05
T_cell_gamma_delta	NT-4	NT-1	0.891258
T_cell_gamma_delta	NT-4	NT-2	0.524723
T_cell_gamma_delta	NT-4	NT-3	0.943496
T_cell_gamma_delta	NT-1	NT-2	0.475196
T_cell_gamma_delta	NT-1	NT-3	0.980178
T_cell_gamma_delta	NT-2	NT-3	0.604732
NK_cell_resting	NT-4	NT-1	1.21231e-05
NK_cell_resting	NT-4	NT-2	8.43846e-05
NK_cell_resting	NT-4	NT-3	0.969471
NK_cell_resting	NT-1	NT-2	2.88529e-13
NK_cell_resting	NT-1	NT-3	0.000828858
NK_cell_resting	NT-2	NT-3	0.0053417
NK_cell_activated	NT-4	NT-1	0.345928
NK_cell_activated	NT-4	NT-2	1.9873e-06
NK_cell_activated	NT-4	NT-3	0.914475
NK_cell_activated	NT-1	NT-2	4.69421e-09
NK_cell_activated	NT-1	NT-3	0.348499
NK_cell_activated	NT-2	NT-3	0.000542468
Monocyte	NT-4	NT-1	0.836223
Monocyte	NT-4	NT-2	1.41583e-09
Monocyte	NT-4	NT-3	1.43984e-05
Monocyte	NT-1	NT-2	7.44979e-10
Monocyte	NT-1	NT-3	1.25097e-05
Monocyte	NT-2	NT-3	0.661469
Macrophage_M0	NT-4	NT-1	0.628244
Macrophage_M0	NT-4	NT-2	1.89474e-06
Macrophage_M0	NT-4	NT-3	0.0249052
Macrophage_M0	NT-1	NT-2	1.34373e-06
Macrophage_M0	NT-1	NT-3	0.0107815
Macrophage_M0	NT-2	NT-3	0.0736504
Macrophage_M1	NT-4	NT-1	0.520683
Macrophage_M1	NT-4	NT-2	1.41708e-08
Macrophage_M1	NT-4	NT-3	0.451552
Macrophage_M1	NT-1	NT-2	3.78475e-08
Macrophage_M1	NT-1	NT-3	0.229893
Macrophage_M1	NT-2	NT-3	0.000520772
Macrophage_M2	NT-4	NT-1	1.48803e-17
Macrophage_M2	NT-4	NT-2	3.55003e-05
Macrophage_M2	NT-4	NT-3	0.233433
Macrophage_M2	NT-1	NT-2	3.90265e-30
Macrophage_M2	NT-1	NT-3	2.01294e-08
Macrophage_M2	NT-2	NT-3	7.53612e-06
Myeloid_dendritic_cell_resting	NT-4	NT-1	0.0106981
Myeloid_dendritic_cell_resting	NT-4	NT-2	0.710623
Myeloid_dendritic_cell_resting	NT-4	NT-3	0.036419
Myeloid_dendritic_cell_resting	NT-1	NT-2	0.0311795
Myeloid_dendritic_cell_resting	NT-1	NT-3	6.51555e-05
Myeloid_dendritic_cell_resting	NT-2	NT-3	0.0230741
Myeloid_dendritic_cell_activated	NT-4	NT-1	0.960751
Myeloid_dendritic_cell_activated	NT-4	NT-2	0.0084826
Myeloid_dendritic_cell_activated	NT-4	NT-3	0.0289951
Myeloid_dendritic_cell_activated	NT-1	NT-2	0.0129882
Myeloid_dendritic_cell_activated	NT-1	NT-3	0.0276663
Myeloid_dendritic_cell_activated	NT-2	NT-3	0.000164115
Mast_cell_activated	NT-4	NT-1	0.000429981
Mast_cell_activated	NT-4	NT-2	0.0840245
Mast_cell_activated	NT-4	NT-3	0.9593
Mast_cell_activated	NT-1	NT-2	6.26814e-08
Mast_cell_activated	NT-1	NT-3	0.0161115
Mast_cell_activated	NT-2	NT-3	0.188404
Mast_cell_resting	NT-4	NT-1	0.312119
Mast_cell_resting	NT-4	NT-2	0.000791904
Mast_cell_resting	NT-4	NT-3	0.0808112
Mast_cell_resting	NT-1	NT-2	7.99543e-06
Mast_cell_resting	NT-1	NT-3	0.00445775
Mast_cell_resting	NT-2	NT-3	0.339005
Eosinophil	NT-4	NT-1	0.0100793
Eosinophil	NT-4	NT-2	0.00452309
Eosinophil	NT-4	NT-3	0.0338347
Eosinophil	NT-1	NT-2	0.885558
Eosinophil	NT-1	NT-3	0.851945
Eosinophil	NT-2	NT-3	0.944603
Neutrophil	NT-4	NT-1	0.000447216
Neutrophil	NT-4	NT-2	1.66058e-06
Neutrophil	NT-4	NT-3	0.0454056
Neutrophil	NT-1	NT-2	5.16636e-12
Neutrophil	NT-1	NT-3	0.235736
Neutrophil	NT-2	NT-3	4.44128e-08
