# Supplementary material for: Deciphering of Adult Glioma Vulnerabilities through Expression Pattern Analysis of GABA, Glutamate and Calcium Neurotransmitter Genes
Source: J Pers Med. 2022 Apr 14;12(4):633. doi: 10.3390/jpm12040633 (PMC9030730; doi:10.3390/jpm12040633)
Supplement: Supplementary file 1 [file jpm-12-00633-s001.zip › supplementary_data_tableS8_epidemio_biomol_distribution.xlsx]

## Sheet: CGGA_IDHall_formated_data
Supplementary data Table S8. Distribution of biomolecular and epidemiological variables among CGGA NT-1-4 like glioma clusters.
variable	category	NT-1 Like (n = 189)	NT-2 Like (n = 259)	NT-3 Like (n = 166)	NT-4 Like (n = 275)
Age_in_years	Min.	17	11	14	8
Age_in_years	1st Qu.	34	41	35	32
Age_in_years	Median	41	47.5	43	38
Age_in_years	Mean	41.5026	48.7674	42.6265	38.9745
Age_in_years	3rd Qu.	49	59	49.75	45
Age_in_years	Max.	70	79	70	69
Gender	Female	75/189 (39.68%)	102/259 (39.38%)	78/166 (46.99%)	113/275 (41.09%)
Gender	Male	114/189 (60.32%)	157/259 (60.62%)	88/166 (53.01%)	162/275 (58.91%)
Histology	Astrocytoma	103/189 (54.5%)	66/259 (25.48%)	74/166 (44.58%)	115/275 (41.82%)
Histology	Glioblastoma	47/189 (24.87%)	188/259 (72.59%)	37/166 (22.29%)	72/275 (26.18%)
Histology	Oligodendroglioma	39/189 (20.63%)	5/259 (1.93%)	55/166 (33.13%)	86/275 (31.27%)
Histology	Unknown	0/189 (0%)	0/259 (0%)	0/166 (0%)	2/275 (0.73%)
Grade	G2	80/189 (42.33%)	25/259 (9.65%)	49/166 (29.52%)	102/275 (37.09%)
Grade	G3	62/189 (32.8%)	46/259 (17.76%)	80/166 (48.19%)	99/275 (36%)
Grade	G4	47/189 (24.87%)	188/259 (72.59%)	37/166 (22.29%)	72/275 (26.18%)
Grade	Unknown	0/189 (0%)	0/259 (0%)	0/166 (0%)	2/275 (0.73%)
classification	IDHmut 1p19q-codel	31/189 (16.4%)	4/259 (1.54%)	58/166 (34.94%)	89/275 (32.36%)
classification	IDHmut non-1p19q-codel	81/189 (42.86%)	33/259 (12.74%)	64/166 (38.55%)	137/275 (49.82%)
classification	IDHwt	77/189 (40.74%)	222/259 (85.71%)	44/166 (26.51%)	49/275 (17.82%)
IDH_mutation_status	Mutant	112/189 (59.26%)	37/259 (14.29%)	122/166 (73.49%)	226/275 (82.18%)
IDH_mutation_status	WT	77/189 (40.74%)	222/259 (85.71%)	44/166 (26.51%)	49/275 (17.82%)
1p19q_codeletion_status	Codel	37/189 (19.58%)	6/259 (2.32%)	61/166 (36.75%)	90/275 (32.73%)
1p19q_codeletion_status	Non-codel	152/189 (80.42%)	253/259 (97.68%)	105/166 (63.25%)	185/275 (67.27%)
