# Supplementary figures and images for: Deciphering of Adult Glioma Vulnerabilities through Expression Pattern Analysis of GABA, Glutamate and Calcium Neurotransmitter Genes
Source: MDPI journal article supplement (doi:10.3390/jpm12040633), 2022-04-14

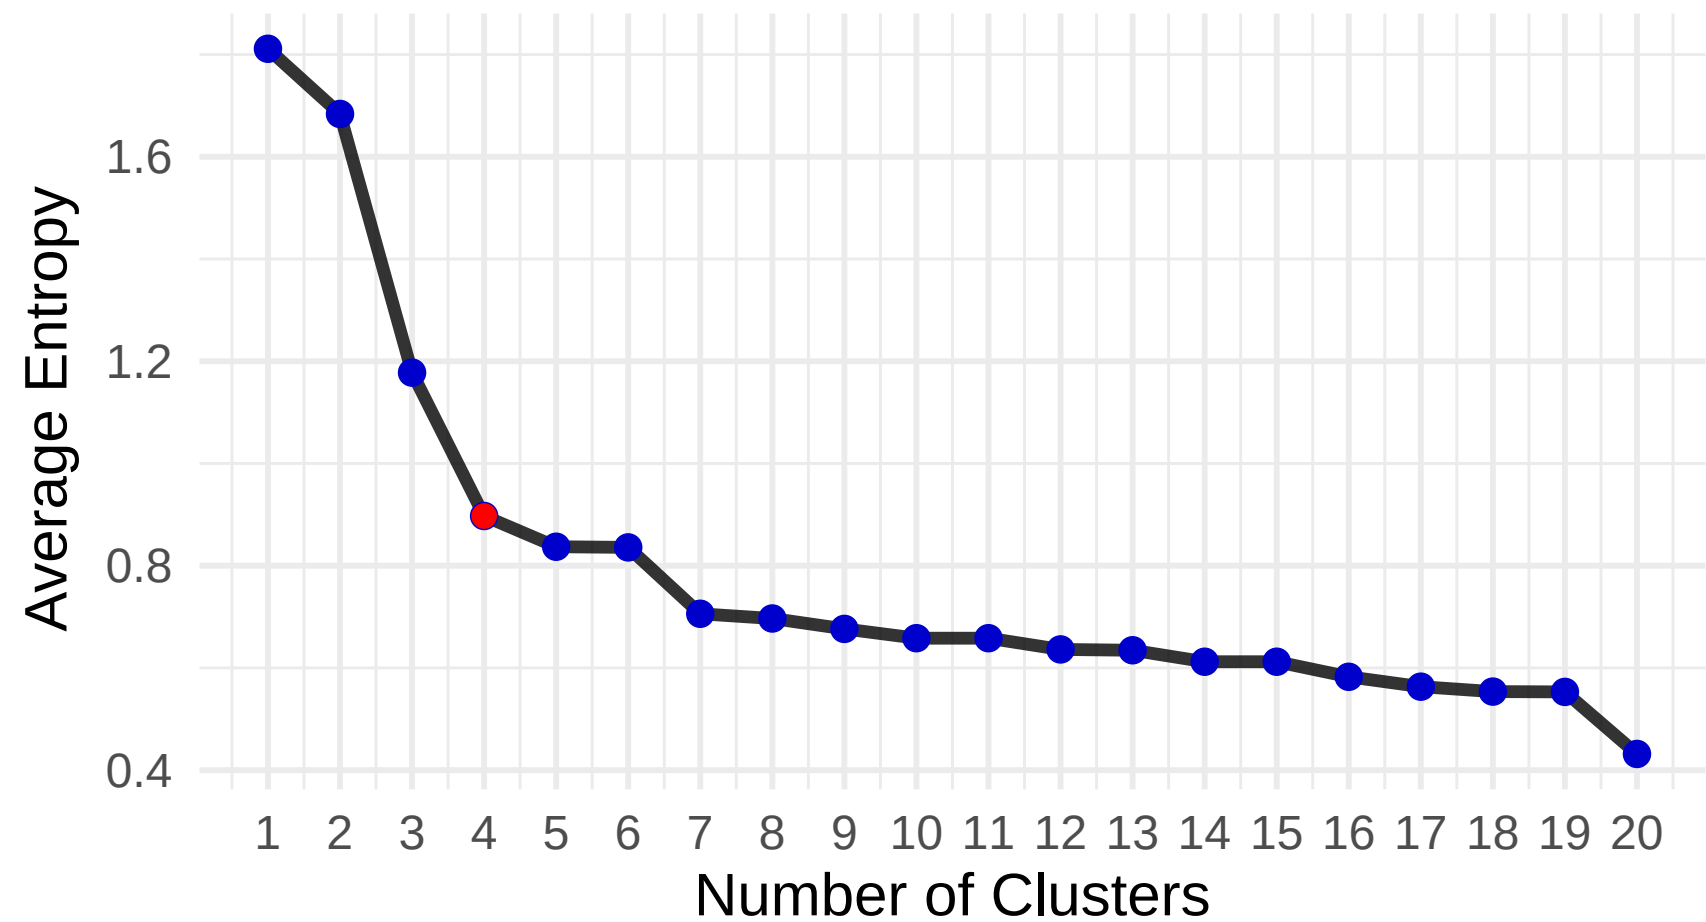

Supplement: s1 [file s1]

Negative correlated-gene GO terms

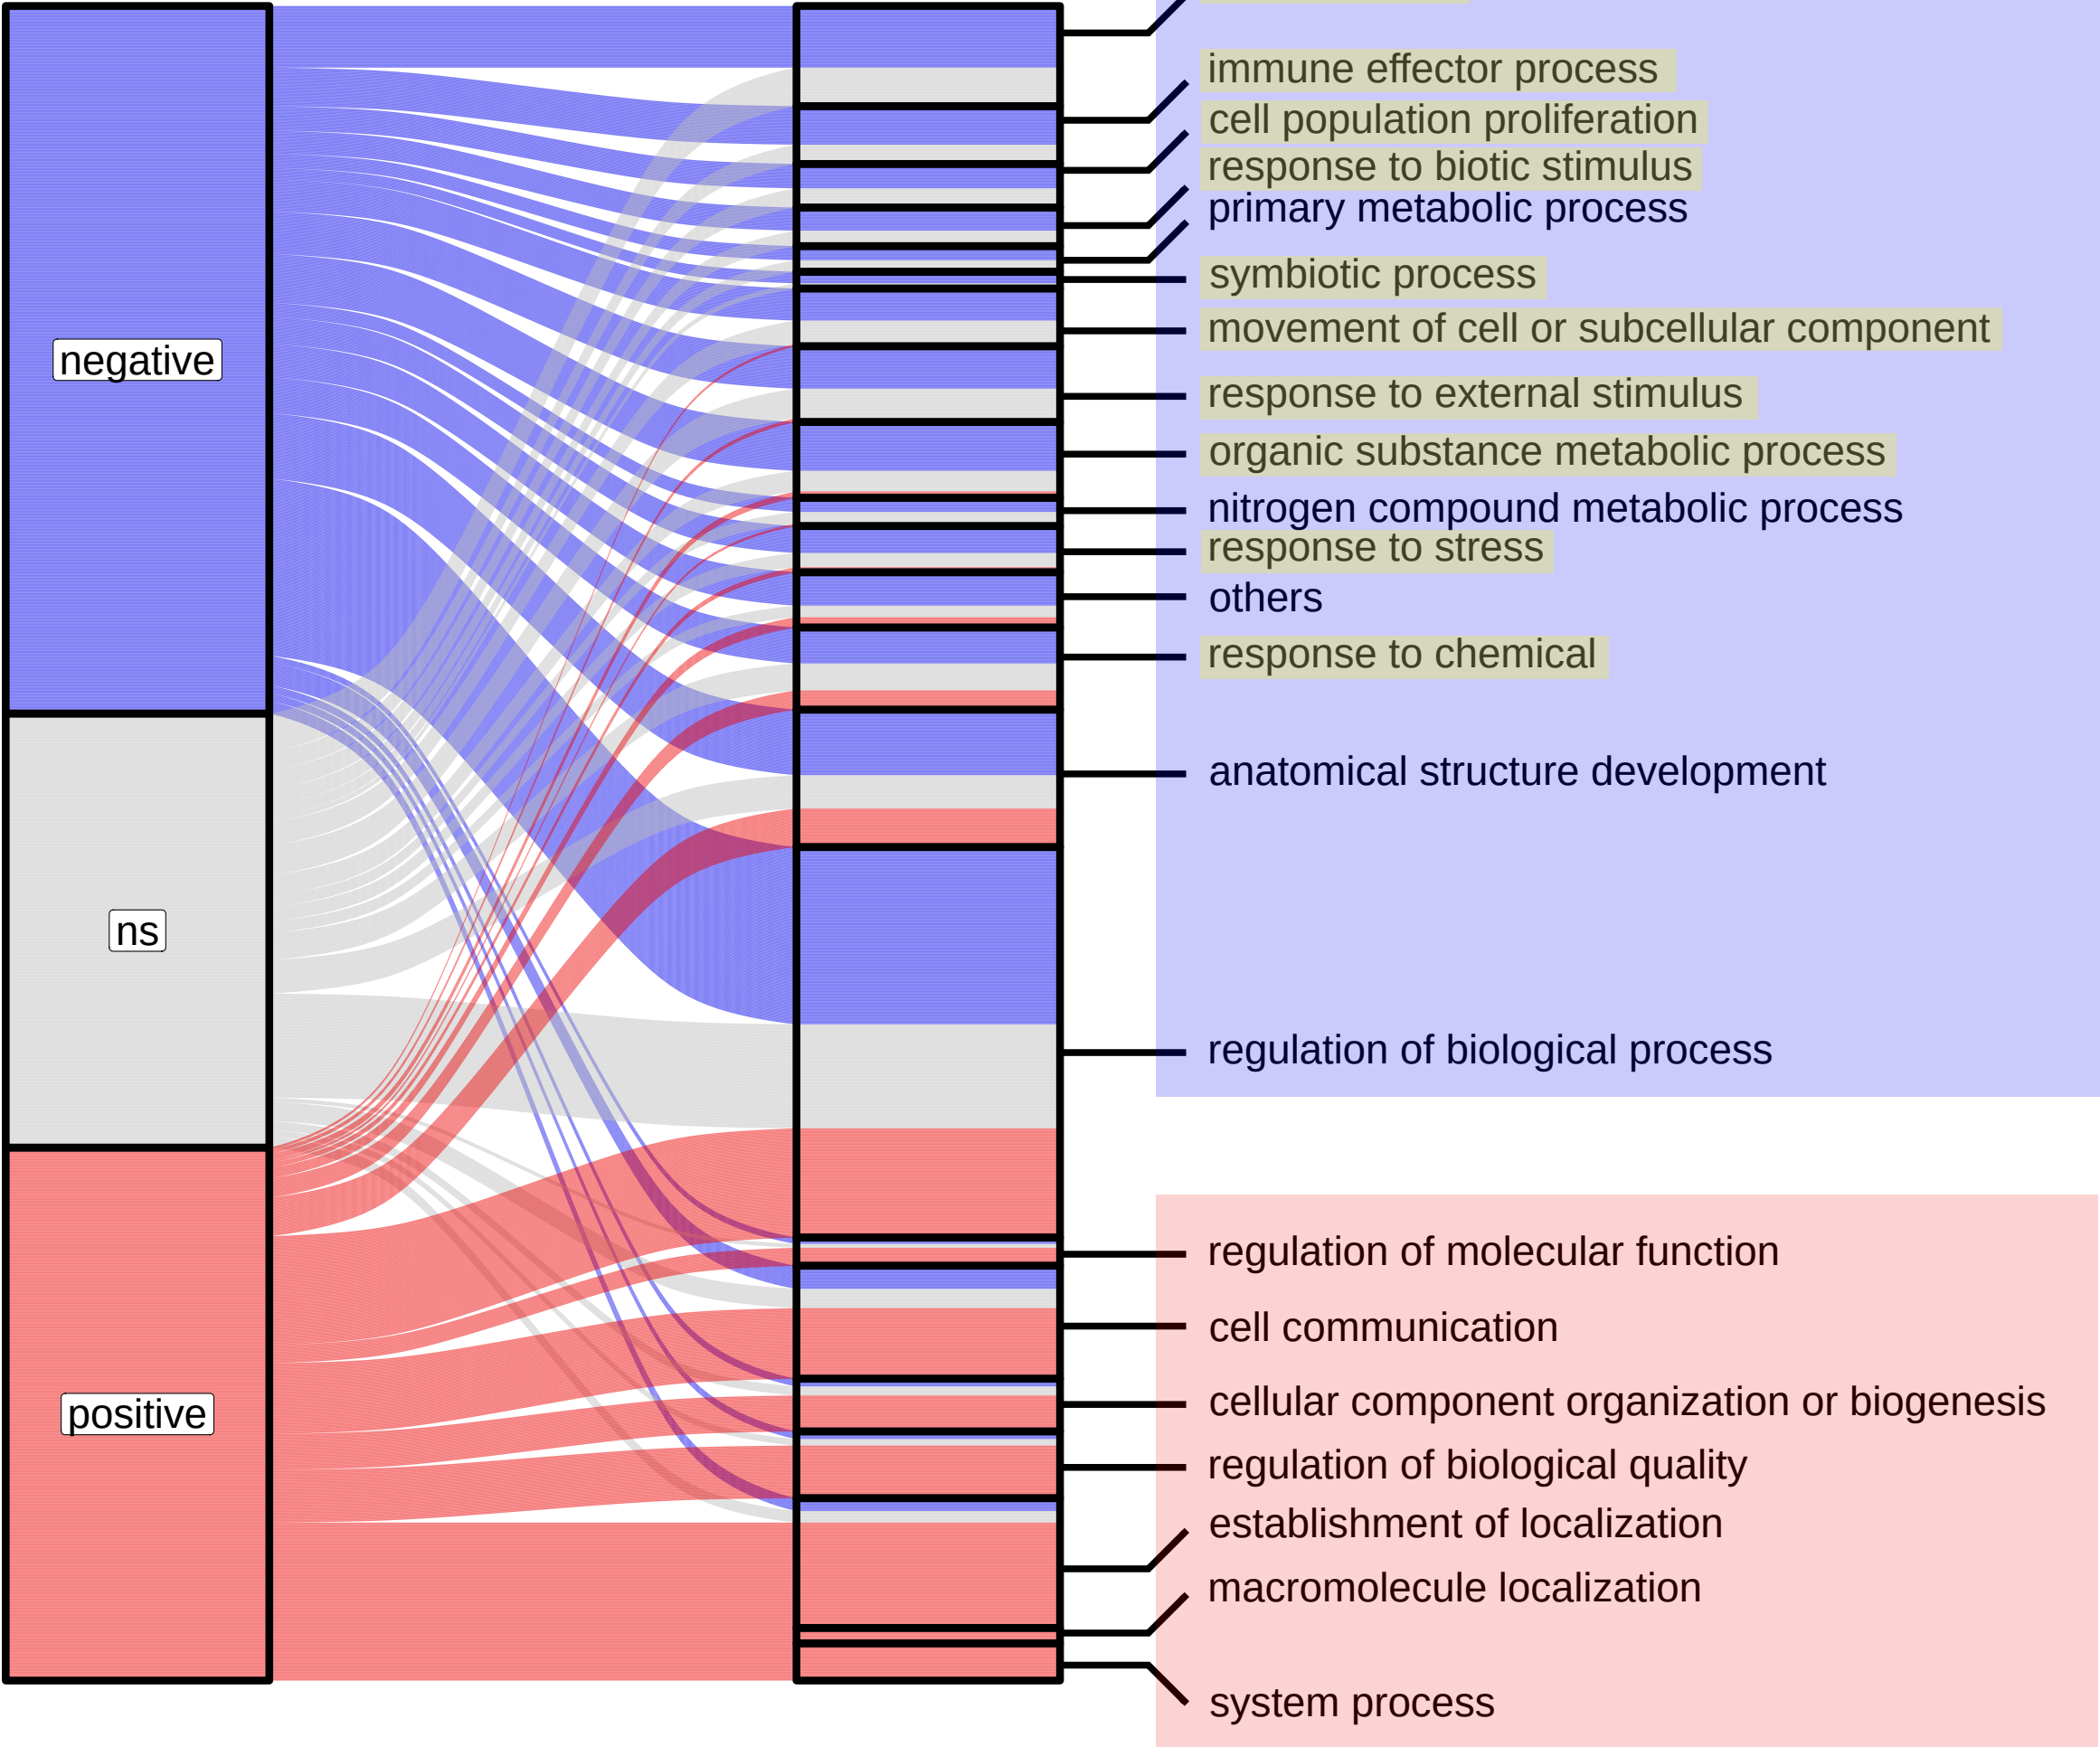

Supplement: s1 [file s1]

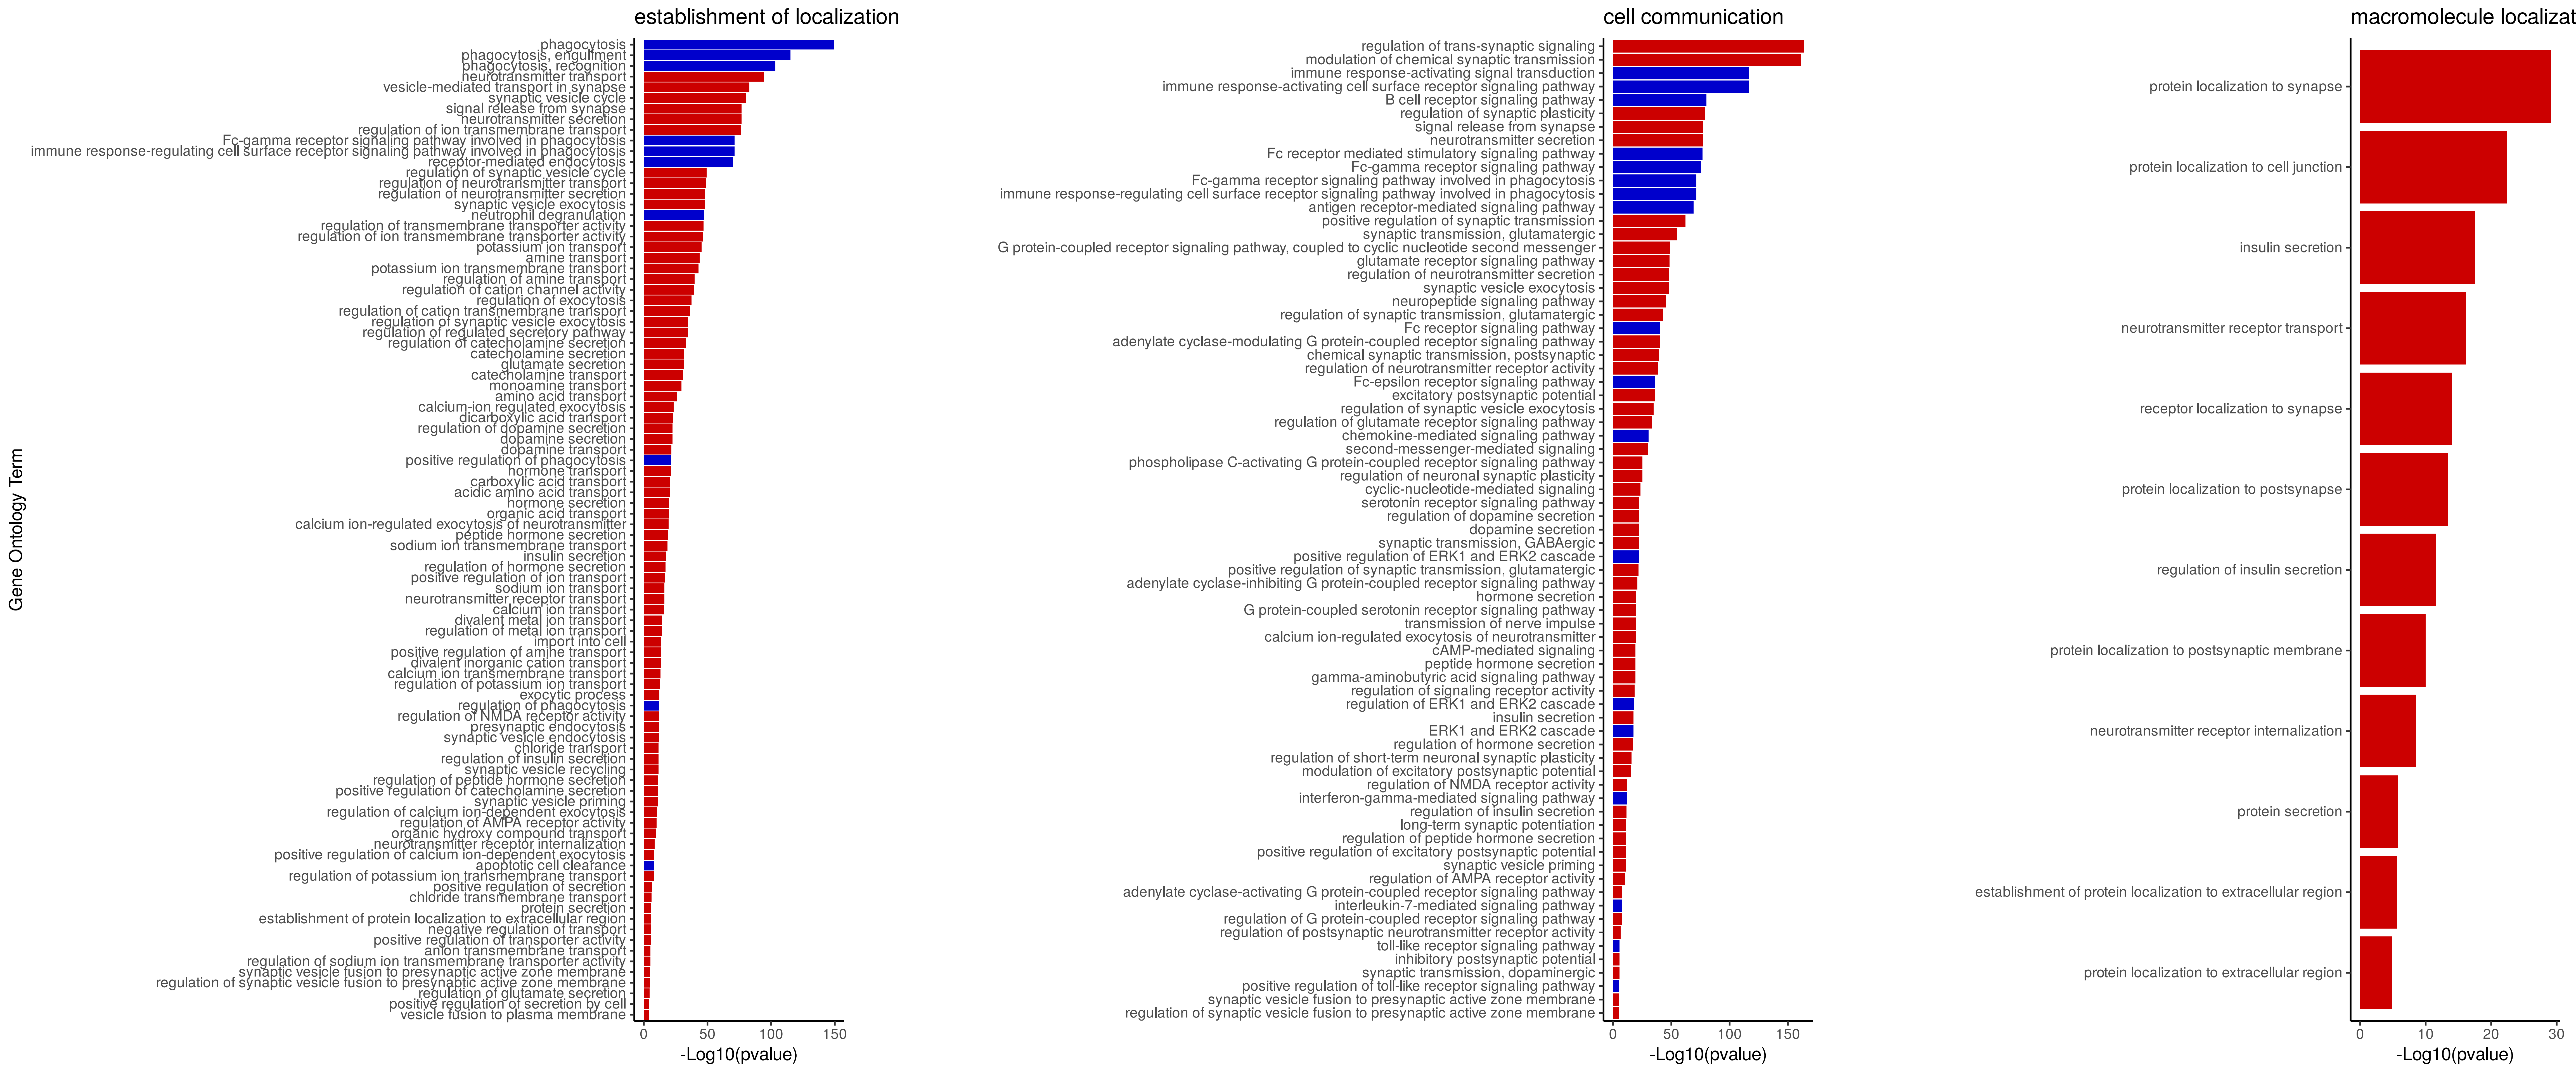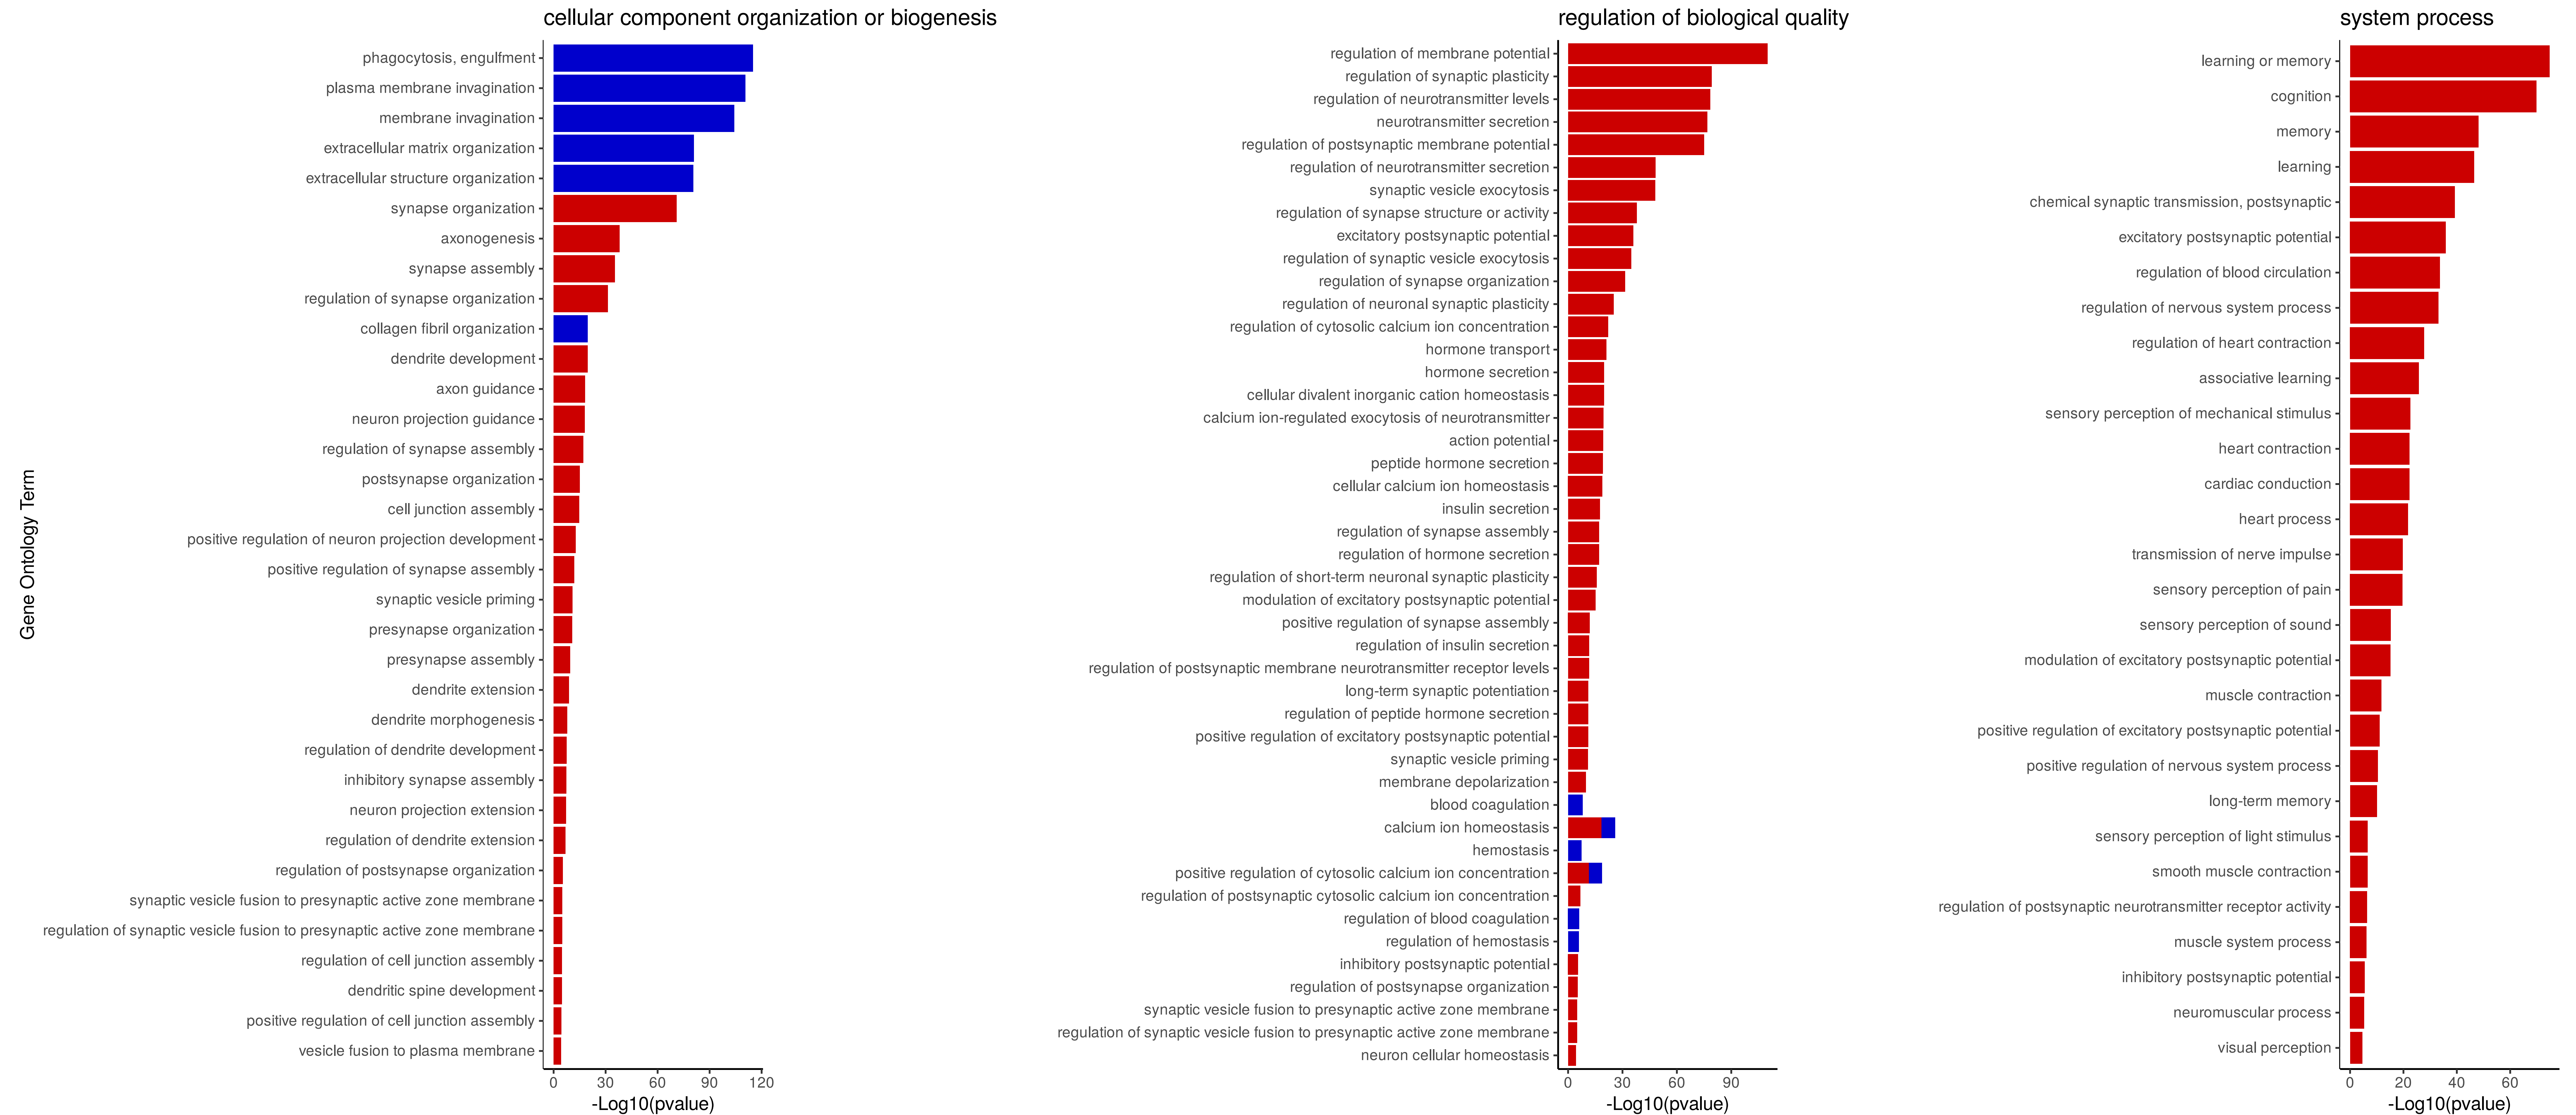

Supplement: s1 [file s1]

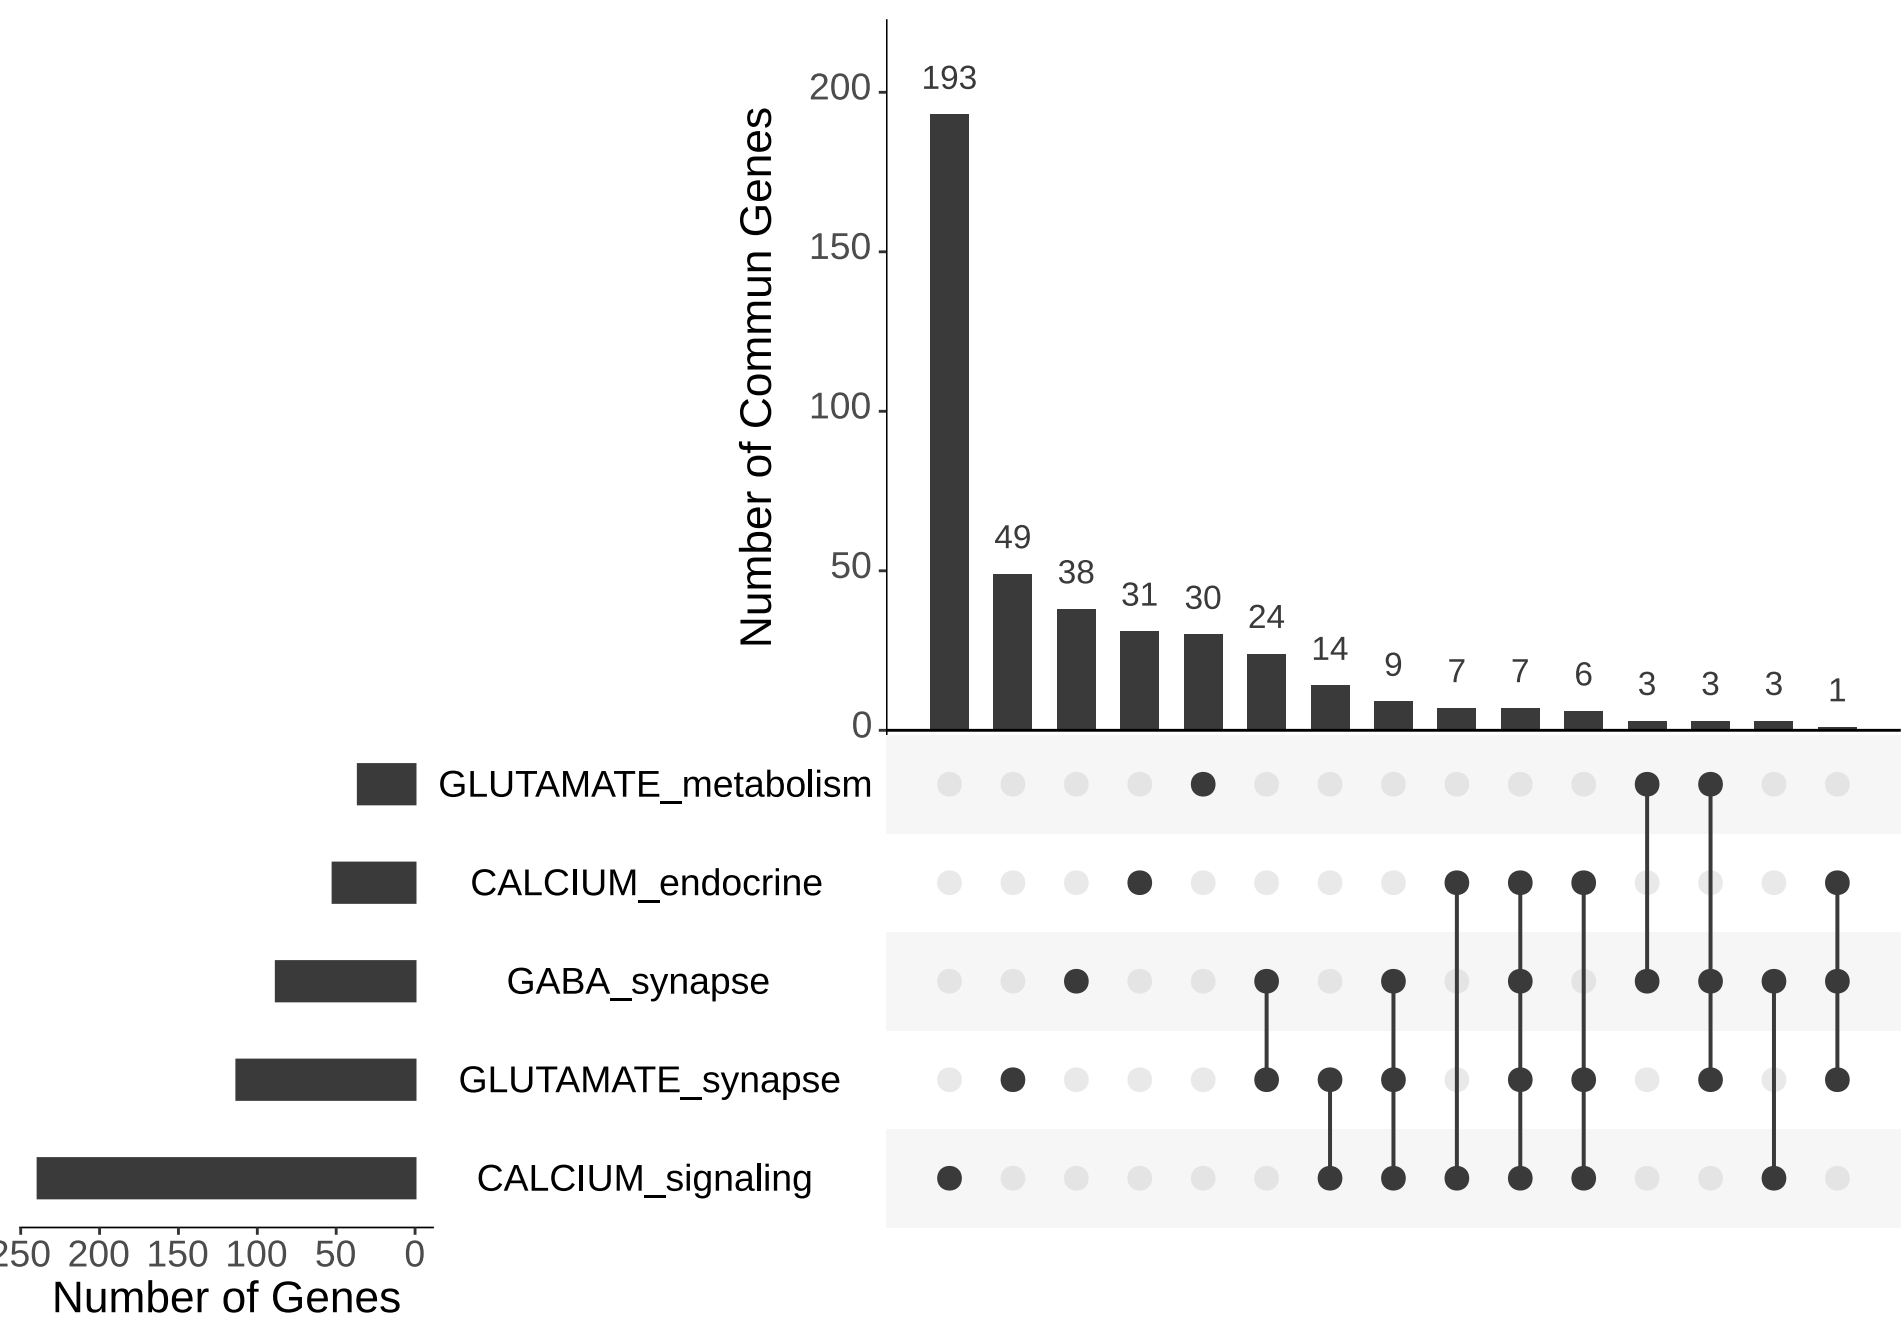

Supplement: s1 [file s1]
